# Supplementary material for: Rational assembly of synthetic marine biofilm community with chitinase production
Source: Research Square preprint supplement (doi:10.21203/rs.3.rs-9419003/v1), 2026-06-04
Supplement: Supplementary file 1 [file 5e31d3749d7331789f4f0d7a.docx]

**Supplementary Table 2**: Chemical composition of selective media

| **Isolates** | **Media code** | **Media composition** | **Growth parameters** |
| --- | --- | --- | --- |
| H02 | M-A-5a | hMA+100ug/mL Nafcillin + 500 ug/mL cloxacillin | 24 hrs/30°C |
| H13 | M-A-17 | hMA+40ug/mL Thalium (I) acetate | 2-3 days/30°C; small semitransparent (H2, H22 and ATLC3 grow faster, not reliable in their presence) |
| H22 | M-A-16 | hMA+100ug/mL 5-Fluorouracil + 50ug/mL Cupric chloride | 5-7 days/30°C, yellow |
| H25 | M-A-14 | hMA+25ug/mL Spiramycin | 3 days/30°C small size colonies (B27 full size) |
| H26 | M-A-15 | hMA+50ug/mL Benzethonium chloride + 50ug/mL Dodecyl trimethyl ammonium bromide | 24 hrs/30°C – small  Full size – 48 hrs |
| H29 | M-A-7 | hMA+25ug/mL Dodecyl trimethyl ammonium bromide + 25ug/mL 2',2'-dipridyl | 24 hrs/30°C – small  (H2 grows full size) |
| ATLC3 | M-A-10 | hMA+ 50ug/mL Penicillin G sodium salt | 24 hrs/30°C |
| ATLC8b | M-A-11 | hMA+ 50ug/mL cephalothin + 50ug/mL Potassium chromate | 24 hrs/30°C, semitransparent |
| B27 | M-A-14a | hMA+ 50ug/mL Spiramycin | 2 days/30°C |

**Supplementary Table 3:** Water contact angle measurement of community members and PVC material

| **Taxonomic ID** | **Isolate** | **Mean CA [°] ± SD** |
| --- | --- | --- |
| *Alteromonas oceani* strain S35 | H02 | 65.91 |
| *Marinobacter adhaerens* HP15 | H13 | 11.48 |
| *Marinobacter dokdonensis* DSW-8 | H22 | 24.73 |
| *Psychrobacter piscatorii* T-3-2 | H25 | 22.47 |
| *Psychrobacter piscatorii* T-3-2 | H26 | 15.16 |
| *Psychrobacter piscatorii* T-3-2 | H27 | 16.46 |
| *Psychrobacter piscatorii* T-3-2 | H29 | 9.61 |
| *Pseudoalteromonas sp.* ATL1 | ATL1 | 17.82 |
| *Pseudoalteromonas piscicida* ATL3 | ATL3 | 16.54 |
| *Rheinheimera sp.* ATLC3 | ATL28 | 12.7 |
| *Simiduia agarivorans* ATLC8b | ATLC3 | 14.88 |
| *Pseudoalteromonas piscicida* ATL28 | ATLC8b | 14.4 |
| *Isoptericola dokdonensis* ATLC11 | ATLC11 | 13.12 5.29 |
| *Roseobacter denitrificans* Och 114 | B2 | 13.87 |
| *Diniroseobacter shibae* DFL12 | B11 | 11.25 2.19 |
| *Phaeobacter gallaeciensis* BS107 | B13 | 16.79 |
| *Phaeobacter sp.* Y41 | B27 | 11.95 |
| PVC coupon |  | 90.77 |

CA- water contact angle, SD = standard deviation calculated from nine independent measurements.
