# Supplementary material for: Rational assembly of synthetic marine biofilm community with chitinase production
Source: Research Square preprint supplement (doi:10.21203/rs.3.rs-9419003/v1), 2026-06-04
Supplement: Supplementary file 1 [file 014fdf35ef4789e5e7f049b4.xlsx]

## Sheet: venn_diagram_data
Supplementary Table 1: Venn diagram data for Figure 2a with species and traits
S.N.	Assembly_id	species	taxon	chitinase-production	adhesion	colonization-resistance	drag-reducing
0	GCA_002237595.1	Labrenzia sp. VG12	2021862	TRUE	TRUE	TRUE	TRUE
1	GCA_011009015.1	Spartinivicinus ruber	2683272	TRUE	TRUE	TRUE	TRUE
2	GCA_002876085.1	Vibrio lentus	136468	TRUE	TRUE	FALSE	TRUE
3	GCA_002877235.1	Vibrio lentus	136468	TRUE	TRUE	FALSE	TRUE
4	GCA_002873075.1	Vibrio lentus	136468	TRUE	TRUE	FALSE	TRUE
5	GCA_001705665.1	Thioclava sp. SK-1	1889770	TRUE	TRUE	FALSE	TRUE
6	GCA_000238315.4	Pseudoalteromonas piscicida	1279016	TRUE	TRUE	FALSE	TRUE
7	GCA_002694315.1	Spongiibacter sp.	2024860	TRUE	TRUE	FALSE	TRUE
8	GCA_002718075.1	Pseudomonadales bacterium	1891229	TRUE	TRUE	FALSE	TRUE
9	GCA_002874305.1	Vibrio lentus	136468	TRUE	TRUE	FALSE	TRUE
10	GCA_002708905.1	Pseudomonadales bacterium	1891229	TRUE	TRUE	FALSE	TRUE
11	GCA_000473895.1	Rubidibacter lacunae	582515	TRUE	TRUE	FALSE	TRUE
12	GCA_002718735.1	Halobacteriovoraceae bacterium	2026745	TRUE	TRUE	FALSE	TRUE
13	GCA_002709295.1	Phycisphaerae bacterium	2026778	TRUE	TRUE	FALSE	TRUE
14	GCA_002690755.1	Phycisphaerae bacterium	2026778	TRUE	TRUE	FALSE	TRUE
15	GCA_001999225.1	Pseudoalteromonas aliena	247523	TRUE	TRUE	FALSE	TRUE
16	GCA_014763045.1	Sulfitobacter aestuariivivens	2766981	TRUE	TRUE	FALSE	TRUE
17	GCA_001635565.1	Alcanivorax sp. HI0011	1822220	TRUE	TRUE	FALSE	TRUE
18	GCA_014163635.1	Pseudoalteromonas sp. SR44-8	2760933	TRUE	TRUE	FALSE	TRUE
19	GCA_900104145.1	Pseudovibrio sp. Tun.PSC04-5.I4	1798213	TRUE	TRUE	FALSE	TRUE
20	GCA_002875825.1	Vibrio lentus	136468	TRUE	TRUE	FALSE	TRUE
21	GCA_000455705.1	Pseudomonas aeruginosa	1333855	TRUE	TRUE	FALSE	TRUE
22	GCA_002719755.1	Spongiibacter sp.	2024860	TRUE	TRUE	FALSE	TRUE
23	GCA_009649685.1	Kriegella sp. EG-1	2664451	TRUE	TRUE	FALSE	TRUE
24	GCA_900163965.1	Vibrio ruber	1123498	TRUE	TRUE	FALSE	TRUE
25	GCA_002716305.1	Peredibacter sp.	2024850	TRUE	TRUE	FALSE	TRUE
26	GCA_002688475.1	Idiomarinaceae bacterium	1898113	TRUE	TRUE	TRUE	FALSE
27	GCA_002876415.1	Vibrio lentus	136468	TRUE	TRUE	FALSE	TRUE
28	GCA_002712005.1	Halobacteriovoraceae bacterium	2026745	TRUE	TRUE	FALSE	TRUE
29	GCA_011806535.1	Vibrio campbellii	680	TRUE	TRUE	FALSE	TRUE
30	GCA_014163985.1	Pseudoalteromonas sp. SR41-4	2760950	TRUE	TRUE	FALSE	TRUE
31	GCA_001625575.1	Pseudoalteromonas luteoviolacea	1365255	TRUE	TRUE	FALSE	TRUE
32	GCA_002874235.1	Vibrio lentus	136468	TRUE	TRUE	FALSE	TRUE
33	GCA_002731975.1	Coxiellaceae bacterium	2026727	TRUE	TRUE	FALSE	TRUE
34	GCA_001625715.1	Pseudoalteromonas luteoviolacea	1365256	TRUE	TRUE	FALSE	TRUE
35	GCA_002872615.1	Vibrio lentus	136468	TRUE	TRUE	FALSE	TRUE
36	GCA_001974565.1	Vibrio sp. 10N.222.47.A9	1903178	TRUE	TRUE	FALSE	TRUE
37	GCA_000334195.1	Vibrio campbellii	1224742	TRUE	TRUE	FALSE	TRUE
38	GCA_009735315.1	Kocuria sediminis	1038857	TRUE	TRUE	FALSE	TRUE
39	GCA_002686755.1	Verrucomicrobiales bacterium	2026801	TRUE	TRUE	TRUE	FALSE
40	GCA_002686625.1	Candidatus Poribacteria bacterium	2026781	TRUE	TRUE	FALSE	TRUE
41	GCA_002877725.1	Vibrio lentus	136468	TRUE	TRUE	FALSE	TRUE
42	GCA_002915595.1	Marortus luteolus	2067667	TRUE	TRUE	FALSE	TRUE
43	GCA_014164125.1	Pseudoalteromonas sp. SG44-8	2760958	TRUE	TRUE	FALSE	TRUE
44	GCA_002717465.1	Chloroflexi bacterium	2026724	TRUE	TRUE	FALSE	TRUE
45	GCA_002875785.1	Vibrio lentus	136468	TRUE	TRUE	FALSE	TRUE
46	GCA_002876795.1	Vibrio lentus	136468	TRUE	TRUE	FALSE	TRUE
47	GCA_002874275.1	Vibrio lentus	136468	TRUE	TRUE	FALSE	TRUE
48	GCA_002707495.1	Halobacteriovoraceae bacterium	2026745	TRUE	TRUE	FALSE	TRUE
49	GCA_001456255.1	Vibrio natriegens	1219067	TRUE	TRUE	FALSE	TRUE
50	GCA_002696215.1	Muricauda sp.	192149	TRUE	TRUE	FALSE	TRUE
51	GCA_014163915.1	Pseudoalteromonas sp. SR41-8	2760946	TRUE	TRUE	FALSE	TRUE
52	GCA_001634705.1	Alcanivorax sp. HI0013	1822221	TRUE	TRUE	FALSE	TRUE
53	GCA_002701315.1	Pseudomonadales bacterium	1891229	TRUE	TRUE	FALSE	TRUE
54	GCA_002875745.1	Vibrio lentus	136468	TRUE	TRUE	FALSE	TRUE
55	GCA_002877415.1	Vibrio lentus	136468	TRUE	TRUE	FALSE	TRUE
56	GCA_011440395.1	Pseudomaricurvus alcaniphilus	1166482	TRUE	TRUE	FALSE	TRUE
57	GCA_002875625.1	Vibrio lentus	136468	TRUE	TRUE	FALSE	TRUE
58	GCA_013248905.1	Shewanella sp. VB17	2739432	TRUE	TRUE	FALSE	TRUE
59	GCA_001691195.1	Vibrio lentus	136468	TRUE	TRUE	FALSE	TRUE
60	GCA_002237405.1	Pseudomonas aeruginosa	287	TRUE	TRUE	FALSE	TRUE
61	GCA_900188335.1	Tropicimonas sediminicola	1031541	TRUE	TRUE	FALSE	TRUE
62	GCA_002875845.1	Vibrio lentus	136468	TRUE	TRUE	FALSE	TRUE
63	GCA_002874555.1	Vibrio lentus	136468	TRUE	TRUE	FALSE	TRUE
64	GCA_900141635.1	Peptoclostridium litorale	1121324	TRUE	TRUE	TRUE	FALSE
65	GCA_014705705.1	Spongiibacter pelagi	2760804	TRUE	TRUE	FALSE	TRUE
66	GCA_002876105.1	Vibrio lentus	136468	TRUE	TRUE	FALSE	TRUE
67	GCA_002712625.1	Saprospirales bacterium	2026790	TRUE	TRUE	FALSE	TRUE
68	GCA_001625655.1	Pseudoalteromonas luteoviolacea	1365250	TRUE	TRUE	FALSE	TRUE
69	GCA_002873115.1	Vibrio lentus	136468	TRUE	TRUE	FALSE	TRUE
70	GCA_002873475.1	Vibrio lentus	136468	TRUE	TRUE	FALSE	TRUE
71	GCA_002875805.1	Vibrio lentus	136468	TRUE	TRUE	FALSE	TRUE
72	GCA_002875665.1	Vibrio lentus	136468	TRUE	TRUE	FALSE	TRUE
73	GCA_002237425.1	Pseudomonas aeruginosa	287	TRUE	TRUE	FALSE	TRUE
74	GCA_002208135.1	Pseudoalteromonas piscicida	43662	TRUE	TRUE	FALSE	TRUE
75	GCA_002875385.1	Vibrio sp. 10N.222.52.B12	1880840	TRUE	TRUE	FALSE	TRUE
76	GCA_002872865.1	Vibrio lentus	136468	TRUE	TRUE	FALSE	TRUE
77	GCA_002872925.1	Vibrio lentus	136468	TRUE	TRUE	FALSE	TRUE
78	GCA_002876365.1	Vibrio lentus	136468	TRUE	TRUE	FALSE	TRUE
79	GCA_004328055.1	unclassified	1197472	TRUE	TRUE	FALSE	TRUE
80	GCA_014164575.1	Pseudoalteromonas sp. SG41-1	2760979	TRUE	TRUE	FALSE	TRUE
81	GCA_000091325.1	Shewanella violacea	637905	TRUE	TRUE	FALSE	TRUE
82	GCA_000155555.1	Coleofasciculus chthonoplastes	118168	TRUE	TRUE	FALSE	TRUE
83	GCA_002694845.1	Tistrella sp.	2024861	TRUE	TRUE	FALSE	TRUE
84	GCA_001635525.1	Alcanivorax sp. HI0007	1822218	TRUE	TRUE	FALSE	TRUE
85	GCA_002701845.1	Pseudomonadales bacterium	1891229	TRUE	TRUE	FALSE	TRUE
86	GCA_002877445.1	Vibrio lentus	136468	TRUE	TRUE	FALSE	TRUE
87	GCA_002692685.1	Rhodobiaceae bacterium	2026785	TRUE	TRUE	FALSE	TRUE
88	GCA_009363455.1	Vibrio sp. THAF64	2587860	TRUE	TRUE	FALSE	TRUE
89	GCA_002874445.1	Vibrio lentus	136468	TRUE	TRUE	FALSE	TRUE
90	GCA_002873185.1	Vibrio lentus	136468	TRUE	TRUE	FALSE	TRUE
91	GCA_000013765.1	Shewanella denitrificans	318161	TRUE	TRUE	FALSE	TRUE
92	GCA_002874135.1	Vibrio lentus	136468	TRUE	TRUE	FALSE	TRUE
93	GCA_002872835.1	Vibrio lentus	136468	TRUE	TRUE	FALSE	TRUE
94	GCA_002875945.1	Vibrio lentus	136468	TRUE	TRUE	FALSE	TRUE
95	GCA_002711825.1	Muricauda sp.	192149	TRUE	TRUE	FALSE	TRUE
96	GCA_002874155.1	Vibrio lentus	136468	TRUE	TRUE	FALSE	TRUE
97	GCA_002873995.1	Vibrio lentus	136468	TRUE	TRUE	FALSE	TRUE
98	GCA_000192865.1	Marinomonas mediterranea	717774	TRUE	TRUE	FALSE	TRUE
99	GCA_004323735.1	Streptomonospora litoralis	2498135	TRUE	TRUE	FALSE	TRUE
100	GCA_002706505.1	Spongiibacter sp.	2024860	TRUE	TRUE	FALSE	TRUE
101	GCA_002877115.1	Vibrio lentus	136468	TRUE	TRUE	FALSE	TRUE
102	GCA_009496005.1	Tritonibacter litoralis	2662264	TRUE	TRUE	FALSE	TRUE
103	GCA_002874165.1	Vibrio lentus	136468	TRUE	TRUE	FALSE	TRUE
104	GCA_002874085.1	Vibrio lentus	136468	TRUE	TRUE	FALSE	TRUE
105	GCA_002878635.1	Vibrio lentus	136468	TRUE	TRUE	FALSE	TRUE
106	GCA_005116575.1	Desulforhopalus sp. IMCC35007	2569543	TRUE	TRUE	FALSE	TRUE
107	GCA_002872955.1	Vibrio lentus	136468	TRUE	TRUE	FALSE	TRUE
108	GCA_002686015.1	Acidiferrobacteraceae bacterium	2024893	TRUE	TRUE	FALSE	TRUE
109	GCA_002702705.1	Anaerolineaceae bacterium	2024896	TRUE	TRUE	FALSE	TRUE
110	GCA_000024465.1	Candidatus Puniceispirillum marinum	488538	TRUE	TRUE	FALSE	TRUE
111	GCA_000464435.1	Vibrio campbellii	1224742	TRUE	TRUE	FALSE	TRUE
112	GCA_001767235.1	Moorena producens	1458985	TRUE	TRUE	FALSE	TRUE
113	GCA_014490785.1	Kosakonia sp. SMBL-WEM22	2725560	TRUE	TRUE	FALSE	TRUE
114	GCA_002709065.1	Tistrella sp.	2024861	TRUE	TRUE	FALSE	TRUE
115	GCA_000364845.1	Marinobacter nanhaiticus	626887	TRUE	TRUE	FALSE	TRUE
116	GCA_002872855.1	Vibrio lentus	136468	TRUE	TRUE	FALSE	TRUE
117	GCA_001857985.1	Bacillus velezensis	492670	TRUE	TRUE	FALSE	TRUE
118	GCA_002876065.1	Vibrio lentus	136468	TRUE	TRUE	FALSE	TRUE
119	GCA_001303045.1	Gammaproteobacteria bacterium SG8_11	1703402	TRUE	TRUE	FALSE	TRUE
120	GCA_900188295.1	Paracoccus sediminis	1214787	TRUE	TRUE	FALSE	TRUE
121	GCA_002693615.1	Nocardioides sp.	35761	TRUE	TRUE	FALSE	TRUE
122	GCA_014076915.1	Colwellia sp. MB02u-14	2759815	TRUE	TRUE	FALSE	TRUE
123	GCA_014076845.1	Colwellia sp. MB3u-41	2759811	TRUE	TRUE	FALSE	TRUE
124	GCA_000300005.1	Alcanivorax dieselolei	930169	TRUE	TRUE	FALSE	TRUE
125	GCA_002874115.1	Vibrio lentus	136468	TRUE	TRUE	FALSE	TRUE
126	GCA_001634855.1	Alcanivorax sp. HI0035	1822229	TRUE	TRUE	FALSE	TRUE
127	GCA_001707825.1	Enterovibrio pacificus	1080227	TRUE	TRUE	FALSE	TRUE
128	GCA_002875715.1	Vibrio lentus	136468	TRUE	TRUE	FALSE	TRUE
129	GCA_001691055.1	Aliivibrio logei	688	TRUE	TRUE	TRUE	FALSE
130	GCA_001680025.1	Vibrio natriegens	1219067	TRUE	TRUE	FALSE	TRUE
131	GCA_002721375.1	Verrucomicrobiales bacterium	2026801	TRUE	TRUE	TRUE	FALSE
132	GCA_002875965.1	Vibrio lentus	136468	TRUE	TRUE	FALSE	TRUE
133	GCA_011040495.1	Pseudohalocynthiibacter aestuariivivens	1591409	TRUE	TRUE	FALSE	TRUE
134	GCA_001999205.1	Bacillus sp. 275	1941347	TRUE	TRUE	FALSE	TRUE
135	GCA_002715525.1	Owenweeksia sp.	2024847	TRUE	TRUE	TRUE	FALSE
136	GCA_002877535.1	Vibrio lentus	136468	TRUE	TRUE	FALSE	TRUE
137	GCA_014164235.1	Pseudoalteromonas sp. SG44-17	2760963	TRUE	TRUE	FALSE	TRUE
138	GCA_001661675.2	Croceicoccus marinus	450378	TRUE	TRUE	FALSE	TRUE
139	GCA_001625595.1	Pseudoalteromonas luteoviolacea	1365253	TRUE	TRUE	FALSE	TRUE
140	GCA_002876285.1	Vibrio lentus	136468	TRUE	TRUE	FALSE	TRUE
141	GCA_003312585.1	Vibrio campbellii	1088888	TRUE	TRUE	FALSE	TRUE
142	GCA_000304635.1	Rhodopirellula baltica	993517	TRUE	TRUE	FALSE	TRUE
143	GCA_020147905.1	Pseudomonas aeruginosa	287	TRUE	TRUE	FALSE	TRUE
144	GCA_015207455.1	Microcoleus sp. LEGE 07076	915322	TRUE	TRUE	FALSE	TRUE
145	GCA_000974945.1	Pseudoalteromonas luteoviolacea	1129367	TRUE	TRUE	FALSE	TRUE
146	GCA_007995015.1	Luteibaculum oceani	1294296	TRUE	TRUE	FALSE	TRUE
147	GCA_002877485.1	Vibrio lentus	136468	TRUE	TRUE	FALSE	TRUE
148	GCA_000695255.1	Photobacterium galatheae	1654360	TRUE	TRUE	FALSE	TRUE
149	GCA_014076795.1	Colwellia sp. MB3u-28	2759812	TRUE	TRUE	FALSE	TRUE
150	GCA_002874515.1	Vibrio lentus	136468	TRUE	TRUE	FALSE	TRUE
151	GCA_002762595.1	Serratia marcescens	615	TRUE	TRUE	FALSE	TRUE
152	GCA_002874485.1	Vibrio lentus	136468	TRUE	TRUE	FALSE	TRUE
153	GCA_011009535.1	Adonisia turfae	2304604	TRUE	TRUE	FALSE	TRUE
154	GCA_002698645.1	Legionellales bacterium	2026754	TRUE	TRUE	FALSE	TRUE
155	GCA_002876845.1	Vibrio lentus	136468	TRUE	TRUE	FALSE	TRUE
156	GCA_900116575.1	Pseudovibrio denitrificans	258256	TRUE	TRUE	FALSE	TRUE
157	GCA_000353245.1	Bacillus stratosphericus	1236481	TRUE	TRUE	FALSE	TRUE
158	GCA_000244955.1	Saccharomonospora marina	882083	TRUE	TRUE	FALSE	TRUE
159	GCA_000152445.1	Vibrio cholerae	345074	TRUE	TRUE	FALSE	TRUE
160	GCA_015207525.1	Nodosilinea sp. LEGE 06152	2777966	TRUE	TRUE	FALSE	TRUE
161	GCA_009901525.1	Kordia antarctica	1218801	TRUE	TRUE	FALSE	TRUE
162	GCA_900112265.1	Pseudoalteromonas denitrificans	1123010	TRUE	TRUE	FALSE	TRUE
163	GCA_002876405.1	Vibrio lentus	136468	TRUE	TRUE	FALSE	TRUE
164	GCA_900112515.1	Tritonibacter multivorans	928856	TRUE	TRUE	FALSE	TRUE
165	GCA_002876025.1	Vibrio lentus	136468	TRUE	TRUE	FALSE	TRUE
166	GCA_002876255.1	Vibrio lentus	136468	TRUE	TRUE	FALSE	TRUE
167	GCA_002689655.1	Rhodopirellula sp.	2024855	TRUE	TRUE	FALSE	TRUE
168	GCA_002695025.1	Owenweeksia sp.	2024847	TRUE	TRUE	TRUE	FALSE
169	GCA_003987355.1	Pseudidiomarina aestuarii	624146	TRUE	TRUE	FALSE	TRUE
170	GCA_002721595.1	Idiomarinaceae bacterium	1898113	TRUE	TRUE	TRUE	FALSE
171	GCA_000318075.1	Vibrio cholerae	693743	TRUE	TRUE	FALSE	TRUE
172	GCA_001625705.1	Pseudoalteromonas luteoviolacea	1365257	TRUE	TRUE	FALSE	TRUE
173	GCA_005885635.1	Maribacter algarum	2578118	TRUE	TRUE	FALSE	TRUE
174	GCA_001433715.1	Alteromonas stellipolaris	1160720	TRUE	TRUE	FALSE	TRUE
175	GCA_002257665.1	Rubricoccus marinus	716817	TRUE	TRUE	FALSE	TRUE
176	GCA_002878515.1	Vibrio lentus	136468	TRUE	TRUE	FALSE	TRUE
177	GCA_002699205.1	Muricauda sp.	192149	TRUE	TRUE	FALSE	TRUE
178	GCA_900142175.1	Maribacter aquivivus	228958	TRUE	TRUE	FALSE	TRUE
179	GCA_001750185.1	Pseudoalteromonas luteoviolacea	1129367	TRUE	TRUE	FALSE	TRUE
180	GCA_009676865.1	Vibrio sp. THAF191d	2661922	TRUE	TRUE	FALSE	TRUE
181	GCA_002730815.1	Spongiibacter sp.	2024860	TRUE	TRUE	FALSE	TRUE
182	GCA_002687035.1	Croceicoccus sp.	1927144	TRUE	TRUE	FALSE	TRUE
183	GCA_003991405.1	Pseudorhodobacter sp. E13	2487931	TRUE	TRUE	FALSE	TRUE
184	GCA_009708195.1	Vibrio sp. THAF191c	2661921	TRUE	TRUE	FALSE	TRUE
185	GCA_000814765.1	Pseudoalteromonas luteoviolacea	43657	TRUE	TRUE	FALSE	TRUE
186	GCA_001304455.1	Thiotrichales bacterium SG8_50	1703416	TRUE	TRUE	FALSE	TRUE
187	GCA_009910675.1	Photobacterium alginatilyticum	1775171	TRUE	TRUE	FALSE	TRUE
188	GCA_002730895.1	Cupriavidus sp.	1873897	TRUE	TRUE	FALSE	TRUE
189	GCA_002694745.1	Croceicoccus sp.	1927144	TRUE	TRUE	FALSE	TRUE
190	GCA_000473545.1	Vibrio cyclitrophicus	1136163	TRUE	TRUE	FALSE	TRUE
191	GCA_003856525.1	Vibrio viridaestus	2487322	TRUE	TRUE	FALSE	TRUE
192	GCA_001625565.1	Pseudoalteromonas luteoviolacea	1365254	TRUE	TRUE	FALSE	TRUE
193	GCA_002720865.1	Halobacteriovorax sp.	2020862	TRUE	TRUE	FALSE	TRUE
194	GCA_001974605.1	Vibrio lentus	136468	TRUE	TRUE	FALSE	TRUE
195	GCA_009725985.1	Zobellia amurskyensis	248905	TRUE	TRUE	FALSE	TRUE
196	GCA_002683295.1	Pseudomonadales bacterium	1891229	TRUE	TRUE	FALSE	TRUE
197	GCA_002873265.1	Vibrio lentus	136468	TRUE	TRUE	FALSE	TRUE
198	GCA_000376545.2	Tritonibacter mobilis	1265309	TRUE	TRUE	FALSE	TRUE
199	GCA_900102755.1	Prauserella marina	530584	TRUE	TRUE	FALSE	TRUE
200	GCA_000332115.1	Nonlabens dokdonensis	592029	TRUE	TRUE	FALSE	TRUE
201	GCA_014230145.1	Pelagicoccus albus	415222	TRUE	TRUE	FALSE	TRUE
202	GCA_001635515.1	Alcanivorax sp. HI0003	1822217	TRUE	TRUE	FALSE	TRUE
203	GCA_002703625.1	Sandaracinus sp.	2024858	TRUE	TRUE	FALSE	TRUE
204	GCA_002873555.1	Vibrio lentus	136468	TRUE	TRUE	FALSE	TRUE
205	GCA_002876225.1	Vibrio lentus	136468	TRUE	TRUE	FALSE	TRUE
206	GCA_001635455.1	Vibrio sp. HI00D65	1822216	TRUE	TRUE	FALSE	TRUE
207	GCA_020147865.1	Bacillus safensis	561879	TRUE	TRUE	FALSE	TRUE
208	GCA_001625645.1	Pseudoalteromonas luteoviolacea	1365249	TRUE	TRUE	FALSE	TRUE
209	GCA_002726155.1	Alcanivorax sp.	1872427	TRUE	TRUE	FALSE	TRUE
210	GCA_000024805.1	Haliangium ochraceum	502025	TRUE	TRUE	FALSE	TRUE
211	GCA_002874075.1	Vibrio lentus	136468	TRUE	TRUE	FALSE	TRUE
212	GCA_000744275.1	Gillisia sp. Hel_I_29	1249975	TRUE	TRUE	FALSE	TRUE
213	GCA_013403865.1	Winogradskyella costae	2697008	TRUE	TRUE	FALSE	TRUE
214	GCA_003574485.1	Facilibium subflavum	2219058	TRUE	TRUE	FALSE	TRUE
215	GCA_001681925.1	Tritonibacter mobilis	379347	TRUE	TRUE	FALSE	TRUE
216	GCA_013394675.1	Winogradskyella helgolandensis	2697010	TRUE	TRUE	FALSE	TRUE
217	GCA_013404085.1	Winogradskyella helgolandensis	2697010	TRUE	TRUE	FALSE	TRUE
218	GCA_000281085.1	Catenovulum agarivorans	659495	TRUE	TRUE	FALSE	TRUE
219	GCA_014154945.1	Tautonia rosea	2728037	TRUE	TRUE	FALSE	TRUE
220	GCA_001681475.1	Tritonibacter mobilis	379347	TRUE	TRUE	FALSE	TRUE
221	GCA_000382005.1	Pseudoalteromonas piscicida	1279016	TRUE	TRUE	FALSE	TRUE
222	GCA_001682005.1	Tritonibacter mobilis	379347	TRUE	TRUE	FALSE	TRUE
223	GCA_008711465.1	Francisella sp. SYW-9	2610888	TRUE	TRUE	FALSE	TRUE
224	GCA_002148795.1	Oceanibaculum nanhaiense	1909734	TRUE	TRUE	FALSE	TRUE
225	GCA_010993815.1	Flagellimonas sp. HSM57	2654675	TRUE	TRUE	FALSE	TRUE
226	GCA_002320815.1	Myxococcales bacterium UBA1660	1961462	TRUE	TRUE	FALSE	TRUE
227	GCA_000308335.1	Stenotrophomonas maltophilia	1118235	TRUE	TRUE	FALSE	TRUE
228	GCA_001894885.1	Rhodococcus marinonascens	1219020	TRUE	TRUE	FALSE	TRUE
229	GCA_001681355.1	Tritonibacter mobilis	379347	TRUE	TRUE	FALSE	TRUE
230	GCA_001681405.1	Tritonibacter mobilis	379347	TRUE	TRUE	FALSE	TRUE
231	GCA_000745975.1	Desulfobacter vibrioformis	1121398	TRUE	TRUE	FALSE	TRUE
232	GCA_001683015.1	Tritonibacter mobilis	379347	TRUE	TRUE	FALSE	TRUE
233	GCA_001681285.1	Tritonibacter mobilis	379347	TRUE	TRUE	FALSE	TRUE
234	GCA_017948405.1	Psychrosphaera aestuarii	1266052	TRUE	TRUE	FALSE	TRUE
235	GCA_001681525.1	Tritonibacter mobilis	379347	TRUE	TRUE	FALSE	TRUE
236	GCA_014879975.1	Vibrio bathopelagicus	2777577	TRUE	TRUE	FALSE	TRUE
237	GCA_000422345.1	Spongiibacter marinus	1122224	TRUE	TRUE	FALSE	TRUE
238	GCA_000379465.1	Sciscionella marina	1123244	TRUE	TRUE	FALSE	TRUE
239	GCA_000256245.1	Vibrio cyclitrophicus	1136165	TRUE	TRUE	FALSE	TRUE
240	GCA_001681385.1	Tritonibacter mobilis	379347	TRUE	TRUE	FALSE	TRUE
241	GCA_001681955.1	Tritonibacter mobilis	379347	TRUE	TRUE	FALSE	TRUE
242	GCA_004360155.1	Paraglaciecola marina	2500157	TRUE	TRUE	FALSE	TRUE
243	GCA_000276645.1	Pseudoalteromonas sp. NJ631	493915	TRUE	TRUE	FALSE	TRUE
244	GCA_001681445.1	Tritonibacter mobilis	379347	TRUE	TRUE	FALSE	TRUE
245	GCA_013403985.1	Winogradskyella ludwigii	2686076	TRUE	TRUE	FALSE	TRUE
246	GCA_000473205.1	Pseudophaeobacter arcticus	999550	FALSE	TRUE	TRUE	TRUE
247	GCA_000373985.1	Desulfobacter curvatus	1121396	TRUE	TRUE	FALSE	TRUE
248	GCA_009746565.1	Mariniflexile maritimum	2682493	TRUE	TRUE	FALSE	TRUE
249	GCA_005281835.1	Vibrio profundi	1774960	TRUE	TRUE	FALSE	TRUE
250	GCA_000620085.1	Marinobacterium jannaschii	1122200	TRUE	TRUE	FALSE	TRUE
251	GCA_000422525.1	Halodesulfovibrio aestuarii	1121434	TRUE	TRUE	FALSE	TRUE
252	GCA_013623835.1	Brevibacterium oceani	358099	TRUE	TRUE	FALSE	TRUE
253	GCA_013403925.1	Winogradskyella wichelsiae	2697007	TRUE	TRUE	FALSE	TRUE
254	GCA_000256425.1	Vibrio cyclitrophicus	1136174	TRUE	TRUE	FALSE	TRUE
255	GCA_000332135.1	Anabaena sp. PCC 7108	163908	TRUE	TRUE	FALSE	TRUE
256	GCA_001723685.1	Candidatus Marithrix sp. Canyon 246	1827136	TRUE	TRUE	FALSE	TRUE
257	GCA_902551335.1	uncultured Candidatus Actinomarina sp.	1985113	TRUE	TRUE	FALSE	TRUE
258	GCA_001681815.1	Tritonibacter mobilis	379347	TRUE	TRUE	FALSE	TRUE
259	GCA_001682035.1	Tritonibacter mobilis	379347	TRUE	TRUE	FALSE	TRUE
260	GCA_004360225.1	Alcanivorax sp. 24	2545266	TRUE	TRUE	FALSE	TRUE
261	GCA_016469335.1	Flocculibacter collagenilyticus	2744479	TRUE	TRUE	FALSE	TRUE
262	GCA_001723665.1	Candidatus Marithrix sp. Canyon 246	1827136	TRUE	TRUE	FALSE	TRUE
263	GCA_001681485.1	Tritonibacter mobilis	379347	TRUE	TRUE	FALSE	TRUE
264	GCA_001681335.1	Tritonibacter mobilis	379347	TRUE	TRUE	FALSE	TRUE
265	GCA_014154995.1	Tautonia rosea	2728037	TRUE	TRUE	FALSE	TRUE
266	GCA_000262345.1	Streptomyces xiaopingdaonensis	1565415	TRUE	TRUE	FALSE	TRUE
267	GCA_001681975.1	Tritonibacter mobilis	379347	TRUE	TRUE	FALSE	TRUE
268	GCA_006381105.1	Flavicella sediminum	2585141	TRUE	TRUE	FALSE	TRUE
269	GCA_001661495.1	Pseudoalteromonas prydzensis	1315282	TRUE	TRUE	FALSE	TRUE
270	GCA_001681515.1	Tritonibacter mobilis	379347	TRUE	TRUE	FALSE	TRUE
271	GCA_000444805.1	Bacillus safensis	561879	TRUE	TRUE	FALSE	TRUE
272	GCA_001681905.1	Tritonibacter mobilis	379347	TRUE	TRUE	FALSE	TRUE
273	GCA_000259875.1	Vibrio campbellii	1088888	TRUE	TRUE	FALSE	TRUE
274	GCA_000716085.1	Streptomyces sp. NRRL B-24501	1463834	TRUE	TRUE	FALSE	TRUE
275	GCA_012931685.1	Hanstruepera ponticola	2042995	TRUE	TRUE	TRUE	FALSE
276	GCA_001681535.1	Tritonibacter mobilis	379347	TRUE	TRUE	FALSE	TRUE
277	GCA_001681415.1	Tritonibacter mobilis	379347	TRUE	TRUE	FALSE	TRUE
278	GCA_001681365.1	Tritonibacter mobilis	379347	TRUE	TRUE	FALSE	TRUE
279	GCA_000688315.1	Maribacter sp. Hel_I_7	1249997	TRUE	TRUE	FALSE	TRUE
280	GCA_012958305.1	Tautonia rosea	2728037	TRUE	TRUE	FALSE	TRUE
281	GCA_900106965.1	Celeribacter indicus	1208324	FALSE	TRUE	FALSE	TRUE
282	GCA_014076885.1	Colwellia sp. MB3u-22	2759813	TRUE	TRUE	FALSE	FALSE
283	GCA_002713405.1	Crocinitomicaceae bacterium	2026728	TRUE	TRUE	FALSE	FALSE
284	GCA_001304105.1	Deltaproteobacteria bacterium SM23_61	1703399	TRUE	TRUE	FALSE	FALSE
285	GCA_002688135.1	Parcubacteria group bacterium	2026774	TRUE	TRUE	FALSE	FALSE
286	GCA_002729575.1	Oceanospirillaceae bacterium	1899355	TRUE	TRUE	FALSE	FALSE
287	GCA_002726605.1	Candidatus Poribacteria bacterium	2026781	FALSE	TRUE	FALSE	TRUE
288	GCA_001691135.1	Aliivibrio fischeri	668	TRUE	TRUE	FALSE	FALSE
289	GCA_002699065.1	Roseibacillus sp.	2024856	TRUE	TRUE	FALSE	FALSE
290	GCA_000168915.3	Vibrio cholerae	412614	TRUE	TRUE	FALSE	FALSE
291	GCA_014062315.1	Gelidibacter maritimus	2761487	FALSE	TRUE	FALSE	TRUE
292	GCA_001632025.1	Prochlorococcus marinus	1801625	TRUE	TRUE	FALSE	FALSE
293	GCA_002694205.1	Idiomarina sp.	1874361	TRUE	TRUE	FALSE	FALSE
294	GCA_003172875.1	Leucothrix pacifica	1247513	TRUE	TRUE	FALSE	FALSE
295	GCA_000176215.1	Vibrio metoecus	1481663	TRUE	TRUE	FALSE	FALSE
296	GCA_015207255.1	Romeria gracilis	915328	TRUE	TRUE	FALSE	FALSE
297	GCA_900167935.1	Maribacter arcticus	561365	TRUE	TRUE	FALSE	FALSE
298	GCA_002684595.1	Novosphingobium sp.	1874826	TRUE	TRUE	FALSE	FALSE
299	GCA_002725775.1	Planctomycetaceae bacterium	2026779	TRUE	TRUE	FALSE	FALSE
300	GCA_002874925.1	Vibrio lentus	136468	TRUE	TRUE	FALSE	FALSE
301	GCA_002710215.1	Chloroflexi bacterium	2026724	TRUE	TRUE	FALSE	FALSE
302	GCA_002706605.1	Rhodovulum sp.	34009	TRUE	TRUE	FALSE	FALSE
303	GCA_002715285.1	Acidobacteria bacterium	1978231	TRUE	TRUE	FALSE	FALSE
304	GCA_000265405.1	Belliella baltica	866536	TRUE	TRUE	FALSE	FALSE
305	GCA_002742265.1	Maribacter sp. 4G9	1889777	TRUE	TRUE	FALSE	FALSE
306	GCA_003233725.1	Mesonia sp. K7	2218606	TRUE	TRUE	FALSE	FALSE
307	GCA_014163775.1	Shewanella sp. SR43-8	2760938	TRUE	TRUE	FALSE	FALSE
308	GCA_005047655.1	Sinimarinibacterium sp. CAU 1509	2562283	TRUE	TRUE	FALSE	FALSE
309	GCA_002876485.1	Vibrio tasmaniensis	212663	TRUE	TRUE	FALSE	FALSE
310	GCA_004323665.1	Escherichia sp. E10V4	2478971	FALSE	TRUE	FALSE	TRUE
311	GCA_002709045.1	Planctomycetaceae bacterium	2026779	TRUE	TRUE	FALSE	FALSE
312	GCA_002690655.1	Pedosphaera sp.	2024890	TRUE	TRUE	FALSE	FALSE
313	GCA_900142005.1	Dethiosulfatibacter aminovorans	1121476	TRUE	TRUE	FALSE	FALSE
314	GCA_002723175.1	Crocinitomicaceae bacterium	2026728	TRUE	TRUE	FALSE	FALSE
315	GCA_900115105.1	Yoonia tamlensis	390270	TRUE	TRUE	FALSE	FALSE
316	GCA_004634185.1	Flavobacterium arcticum	1784713	TRUE	TRUE	FALSE	FALSE
317	GCA_002694385.1	Sneathiella sp.	1964365	FALSE	TRUE	FALSE	TRUE
318	GCA_015207445.1	Coleofasciculus sp. LEGE 07081	2777967	FALSE	TRUE	FALSE	TRUE
319	GCA_000015245.1	Shewanella amazonensis	326297	TRUE	TRUE	FALSE	FALSE
320	GCA_002729215.1	Rubrivirga sp.	1885344	TRUE	TRUE	FALSE	FALSE
321	GCA_002725545.1	Candidatus Marinimicrobia bacterium	2026760	TRUE	TRUE	FALSE	FALSE
322	GCA_002695705.1	Gemmatimonadetes bacterium	2026742	TRUE	TRUE	FALSE	FALSE
323	GCA_002722955.1	Planctomycetaceae bacterium	2026779	TRUE	TRUE	FALSE	FALSE
324	GCA_002709205.1	Roseibacillus sp.	2024856	TRUE	TRUE	FALSE	FALSE
325	GCA_000764025.1	Pseudohaliea rubra	1265313	TRUE	TRUE	FALSE	FALSE
326	GCA_002689185.1	Balneola sp.	2024824	TRUE	TRUE	FALSE	FALSE
327	GCA_000156295.1	marine gamma proteobacterium HTCC2148	247634	TRUE	TRUE	FALSE	FALSE
328	GCA_002720375.1	Crocinitomicaceae bacterium	2026728	TRUE	TRUE	FALSE	FALSE
329	GCA_000348925.1	Cesiribacter andamanensis	1279009	TRUE	TRUE	FALSE	FALSE
330	GCA_004104375.1	Leeuwenhoekiella aequorea	283736	TRUE	TRUE	FALSE	FALSE
331	GCA_002283365.1	Rubrivirga marina	1196024	TRUE	TRUE	FALSE	FALSE
332	GCA_001304135.1	Omnitrophica WOR_2 bacterium SM23_72	1703777	TRUE	TRUE	FALSE	FALSE
333	GCA_002872555.1	Vibrio sp. 10N.286.55.E10	1884479	TRUE	TRUE	FALSE	FALSE
334	GCA_002687525.1	Micrococcales bacterium	2026762	TRUE	TRUE	FALSE	FALSE
335	GCA_002694145.1	Porticoccaceae bacterium	2026782	TRUE	TRUE	FALSE	FALSE
336	GCA_002720515.1	Myxococcales bacterium	2026763	TRUE	TRUE	FALSE	FALSE
337	GCA_002702725.1	Porticoccaceae bacterium	2026782	TRUE	TRUE	FALSE	FALSE
338	GCA_900114675.1	Yoonia litorea	1123755	TRUE	TRUE	FALSE	FALSE
339	GCA_001303135.1	Parcubacteria bacterium DG_72	1703764	TRUE	TRUE	FALSE	FALSE
340	GCA_002723205.1	Alteromonadaceae bacterium	1916082	TRUE	TRUE	FALSE	FALSE
341	GCA_002721455.1	Alteromonadaceae bacterium	1916082	TRUE	TRUE	FALSE	FALSE
342	GCA_002690985.1	Alteromonas sp.	232	TRUE	TRUE	FALSE	FALSE
343	GCA_002699745.1	Crocinitomicaceae bacterium	2026728	TRUE	TRUE	FALSE	FALSE
344	GCA_012641515.1	Nesterenkonia sedimenti	1463632	TRUE	TRUE	FALSE	FALSE
345	GCA_001303955.1	Bacteroides sp. SM23_62	1703352	TRUE	TRUE	FALSE	FALSE
346	GCA_002698705.1	Formosa sp.	2018467	TRUE	TRUE	FALSE	FALSE
347	GCA_014164085.1	Pseudoalteromonas sp. SG45-5	2760954	TRUE	TRUE	FALSE	FALSE
348	GCA_002707535.1	Candidatus Marinimicrobia bacterium	2026760	TRUE	TRUE	FALSE	FALSE
349	GCA_900176475.1	Tropicibacter naphthalenivorans	441103	TRUE	TRUE	FALSE	FALSE
350	GCA_002696075.1	Balneola sp.	2024824	TRUE	TRUE	FALSE	FALSE
351	GCA_000014705.1	Shewanella frigidimarina	318167	TRUE	TRUE	FALSE	FALSE
352	GCA_001303365.1	Myxococcales bacterium SG8_38_1	1703408	TRUE	TRUE	FALSE	FALSE
353	GCA_900129995.1	Caloranaerobacter azorensis	1121264	TRUE	TRUE	FALSE	FALSE
354	GCA_002729725.1	Puniceicoccaceae bacterium	2026784	TRUE	TRUE	FALSE	FALSE
355	GCA_900107635.1	Flavobacterium gillisiae	150146	TRUE	TRUE	FALSE	FALSE
356	GCA_007050985.1	Gramella sabulilitoris	2583991	TRUE	TRUE	FALSE	FALSE
357	GCA_002690915.1	Crocinitomicaceae bacterium	2026728	TRUE	TRUE	FALSE	FALSE
358	GCA_000196315.1	Croceibacter atlanticus	216432	TRUE	TRUE	FALSE	FALSE
359	GCA_002683825.1	Planctomycetota bacterium	2026780	FALSE	TRUE	FALSE	TRUE
360	GCA_007197775.1	Thalassotalea sp. PS06	2594005	TRUE	TRUE	FALSE	FALSE
361	GCA_002708315.1	Lentimicrobiaceae bacterium	2026756	TRUE	TRUE	FALSE	FALSE
362	GCA_002875635.1	Enterovibrio norvegicus	188144	TRUE	TRUE	FALSE	FALSE
363	GCA_001304495.1	bacterium SM23_57	1703763	TRUE	TRUE	FALSE	FALSE
364	GCA_013364175.1	Streptomyces sp. NA02536	2742133	FALSE	TRUE	FALSE	TRUE
365	GCA_009659405.1	Idiomarina sp. FeN1	2665225	TRUE	TRUE	FALSE	FALSE
366	GCA_002709385.1	Waddliaceae bacterium	2026802	FALSE	TRUE	TRUE	FALSE
367	GCA_900129155.1	Marinomonas polaris	1122206	FALSE	TRUE	FALSE	TRUE
368	GCA_002701525.1	Candidatus Marinimicrobia bacterium	2026760	TRUE	TRUE	FALSE	FALSE
369	GCA_003095655.1	Dokdonia sp. Dokd-P16	2173169	TRUE	TRUE	FALSE	FALSE
370	GCA_014164025.1	Pseudoalteromonas sp. SG45-6	2760953	TRUE	TRUE	FALSE	FALSE
371	GCA_002724575.1	Gemmatimonadetes bacterium	2026742	TRUE	TRUE	FALSE	FALSE
372	GCA_001303065.1	Gammaproteobacteria bacterium SG8_15	1703403	TRUE	TRUE	FALSE	FALSE
373	GCA_014524565.1	Croceimicrobium hydrocarbonivorans	2761580	TRUE	TRUE	FALSE	FALSE
374	GCA_002722375.1	Sulfitobacter sp.	1903071	FALSE	TRUE	FALSE	TRUE
375	GCA_002707125.1	Chloroflexi bacterium	2026724	TRUE	TRUE	FALSE	FALSE
376	GCA_002717085.1	Dehalococcoidia bacterium	2026734	TRUE	TRUE	FALSE	FALSE
377	GCA_002684355.1	Formosa sp.	2018467	TRUE	TRUE	FALSE	FALSE
378	GCA_002696025.1	Crocinitomicaceae bacterium	2026728	TRUE	TRUE	FALSE	FALSE
379	GCA_002872545.1	Vibrio sp. 10N.286.55.E12	1884480	TRUE	TRUE	FALSE	FALSE
380	GCA_001886415.1	Alteromonas mediterranea	314275	TRUE	TRUE	FALSE	FALSE
381	GCA_002683715.1	Microbacterium sp.	51671	TRUE	TRUE	FALSE	FALSE
382	GCA_014077115.1	Colwellia sp. MB02u-19	2759825	TRUE	TRUE	FALSE	FALSE
383	GCA_000981765.1	Kangiella geojedonensis	914150	TRUE	TRUE	FALSE	FALSE
384	GCA_002707865.1	Magnetococcales bacterium	2026759	FALSE	TRUE	FALSE	TRUE
385	GCA_002722795.1	Crocinitomicaceae bacterium	2026728	TRUE	TRUE	FALSE	FALSE
386	GCA_001303995.1	candidate division Zixibacteria bacterium SM23_73	1703425	TRUE	TRUE	FALSE	FALSE
387	GCA_001691025.1	Aliivibrio sp. 1S165	1840086	TRUE	TRUE	FALSE	FALSE
388	GCA_002683475.1	Haliea sp.	1932666	TRUE	TRUE	FALSE	FALSE
389	GCA_002707035.1	Microbacterium sp.	51671	FALSE	TRUE	FALSE	TRUE
390	GCA_000350545.1	Desulfotignum phosphitoxidans	1286635	FALSE	TRUE	FALSE	TRUE
391	GCA_002694225.1	Alteromonas sp.	232	TRUE	TRUE	FALSE	FALSE
392	GCA_002729275.1	Roseibacillus sp.	2024856	TRUE	TRUE	FALSE	FALSE
393	GCA_002687595.1	Halomonas sp.	1486246	TRUE	TRUE	FALSE	FALSE
394	GCA_004421105.1	Nitrosococcus wardiae	1814290	FALSE	TRUE	FALSE	TRUE
395	GCA_002717915.1	Candidatus Marinimicrobia bacterium	2026760	TRUE	TRUE	FALSE	FALSE
396	GCA_002710865.1	Phyllobacteriaceae bacterium	1871068	TRUE	TRUE	FALSE	FALSE
397	GCA_002726515.1	Planctomycetaceae bacterium	2026779	TRUE	TRUE	FALSE	FALSE
398	GCA_000170815.1	unidentified eubacterium SCB49	50743	TRUE	TRUE	FALSE	FALSE
399	GCA_014164315.1	Pseudoalteromonas sp. SG44-1	2760964	TRUE	TRUE	FALSE	FALSE
400	GCA_016653315.1	Halochromatium roseum	391920	TRUE	TRUE	FALSE	FALSE
401	GCA_013416325.1	Halomonas sedimenti	2729618	FALSE	TRUE	FALSE	TRUE
402	GCA_002709695.1	Candidatus Poribacteria bacterium	2026781	FALSE	TRUE	FALSE	TRUE
403	GCA_014164135.1	Pseudoalteromonas sp. SG45-1	2760957	TRUE	TRUE	FALSE	FALSE
404	GCA_012037645.1	Salinimicrobium oceani	2722702	TRUE	TRUE	FALSE	FALSE
405	GCA_001635675.1	Oleiphilus sp. HI0061	1822239	TRUE	TRUE	FALSE	FALSE
406	GCA_002695775.1	Gemmatimonadetes bacterium	2026742	TRUE	TRUE	FALSE	FALSE
407	GCA_002690295.1	Pseudoalteromonadaceae bacterium	2026783	TRUE	TRUE	FALSE	FALSE
408	GCA_002728605.1	Flavobacteriaceae bacterium	1871037	TRUE	TRUE	FALSE	FALSE
409	GCA_001691235.1	Vibrio sp. ZF57	1840084	TRUE	TRUE	FALSE	FALSE
410	GCA_014490725.1	Paracoccus amoyensis	2760093	FALSE	TRUE	FALSE	TRUE
411	GCA_002689705.1	Marinovum sp.	2024839	TRUE	TRUE	FALSE	FALSE
412	GCA_001635605.1	Sulfitobacter sp. HI0054	1822238	FALSE	TRUE	FALSE	TRUE
413	GCA_000760315.1	Prochlorococcus sp. MIT 0702	1499503	TRUE	TRUE	FALSE	FALSE
414	GCA_002729225.1	Nitrospinae bacterium	2026769	TRUE	TRUE	FALSE	FALSE
415	GCA_003025415.1	Photobacterium aquimaris	512643	TRUE	TRUE	FALSE	FALSE
416	GCA_013249065.1	Winogradskyella litoriviva	1220182	TRUE	TRUE	FALSE	FALSE
417	GCA_002687125.1	Parcubacteria group bacterium	2026774	TRUE	TRUE	FALSE	FALSE
418	GCA_000439495.1	Alteromonas mediterranea	1300254	TRUE	TRUE	FALSE	FALSE
419	GCA_005885675.1	Polaribacter aestuariivivens	2304626	TRUE	TRUE	FALSE	FALSE
420	GCA_002719835.1	Candidatus Marinimicrobia bacterium	2026760	TRUE	TRUE	FALSE	FALSE
421	GCA_002729525.1	Nocardioides sp.	35761	TRUE	TRUE	FALSE	FALSE
422	GCA_002685435.1	Cryomorphaceae bacterium	1898111	TRUE	TRUE	FALSE	FALSE
423	GCA_014306105.1	Pontibacter cellulosilyticus	1720253	TRUE	TRUE	FALSE	FALSE
424	GCA_002707095.1	Haliea sp.	1932666	TRUE	TRUE	FALSE	FALSE
425	GCA_001029455.1	Photobacterium ganghwense	320778	TRUE	TRUE	FALSE	FALSE
426	GCA_000307105.1	Desulfobacula toluolica	651182	FALSE	TRUE	FALSE	TRUE
427	GCA_001664505.1	Acidobacteria bacterium Mor1	1660251	TRUE	TRUE	FALSE	FALSE
428	GCA_002691025.1	Spirochaeta sp.	28185	FALSE	TRUE	FALSE	TRUE
429	GCA_000427335.1	Winogradskyella psychrotolerans	641526	TRUE	TRUE	FALSE	FALSE
430	GCA_002716765.1	Candidatus Magasanikbacteria bacterium	2026717	TRUE	TRUE	FALSE	FALSE
431	GCA_002702575.1	Phycisphaerae bacterium	2026778	TRUE	TRUE	FALSE	FALSE
432	GCA_002722915.1	Acidobacteria bacterium	1978231	TRUE	TRUE	FALSE	FALSE
433	GCA_900116235.1	Marininema halotolerans	1155944	FALSE	TRUE	FALSE	TRUE
434	GCA_000158575.1	Stenotrophomonas sp. SKA14	391601	FALSE	TRUE	FALSE	TRUE
435	GCA_000940995.1	Photobacterium gaetbulicola	658445	TRUE	TRUE	FALSE	FALSE
436	GCA_001458275.1	Thalassobius autumnalis	2072972	FALSE	TRUE	FALSE	TRUE
437	GCA_900182725.1	Thalassobius litoralis	1010611	FALSE	TRUE	FALSE	TRUE
438	GCA_002731795.1	Candidatus Marinimicrobia bacterium	2026760	TRUE	TRUE	FALSE	FALSE
439	GCA_006228125.1	Micromonospora orduensis	1420891	FALSE	TRUE	FALSE	TRUE
440	GCA_002697785.1	Rhodobacteraceae bacterium	1904441	TRUE	TRUE	FALSE	FALSE
441	GCA_002709555.1	Rickettsiales bacterium	2026788	TRUE	TRUE	FALSE	FALSE
442	GCA_000808595.1	Alteromonas macleodii	28108	TRUE	TRUE	FALSE	FALSE
443	GCA_002709125.1	Rickettsiales bacterium	2026788	TRUE	TRUE	FALSE	FALSE
444	GCA_002716325.1	Bryobacterales bacterium	2026791	TRUE	TRUE	FALSE	FALSE
445	GCA_000024725.1	Nitrosococcus halophilus	472759	FALSE	TRUE	FALSE	TRUE
446	GCA_001413955.1	Muricauda eckloniae	346185	TRUE	TRUE	FALSE	FALSE
447	GCA_900188235.1	Lutibacter agarilyticus	1109740	TRUE	TRUE	FALSE	FALSE
448	GCA_002708885.1	Verrucomicrobiales bacterium	2026801	TRUE	TRUE	FALSE	FALSE
449	GCA_001690985.1	Aliivibrio sp. 1S175	1840087	TRUE	TRUE	FALSE	FALSE
450	GCA_001678945.1	Phaeobacter gallaeciensis	60890	FALSE	TRUE	FALSE	TRUE
451	GCA_014077375.1	Colwellia sp. BRX8-2	2759838	TRUE	TRUE	FALSE	FALSE
452	GCA_004405125.1	Jeotgalibacillus salarius	546023	TRUE	TRUE	FALSE	FALSE
453	GCA_018457175.1	Pseudohalocynthiibacter aestuariivivens	1591409	TRUE	TRUE	FALSE	FALSE
454	GCA_002702365.1	Crocinitomicaceae bacterium	2026728	TRUE	TRUE	FALSE	FALSE
455	GCA_000756615.1	Paenibacillus durus	44251	FALSE	TRUE	FALSE	TRUE
456	GCA_002727735.1	Crocinitomicaceae bacterium	2026728	TRUE	TRUE	FALSE	FALSE
457	GCA_900129915.1	Tepidibacter thalassicus	1123350	TRUE	TRUE	FALSE	FALSE
458	GCA_002691095.1	Kiritimatiellaceae bacterium	2026752	TRUE	TRUE	FALSE	FALSE
459	GCA_001303285.1	Gammaproteobacteria bacterium SG8_31	1703405	TRUE	TRUE	FALSE	FALSE
460	GCA_002721695.1	Roseibacillus sp.	2024856	TRUE	TRUE	FALSE	FALSE
461	GCA_002705125.1	Verrucomicrobiales bacterium	2026801	TRUE	TRUE	FALSE	FALSE
462	GCA_002701645.1	Candidatus Marinimicrobia bacterium	2026760	TRUE	TRUE	FALSE	FALSE
463	GCA_000294775.2	Cytobacillus oceanisediminis	1196031	FALSE	TRUE	FALSE	TRUE
464	GCA_000507245.1	Salinispira pacifica	1307761	TRUE	TRUE	FALSE	FALSE
465	GCA_001971745.1	Lacinutrix venerupis	1486034	TRUE	TRUE	FALSE	FALSE
466	GCA_001635595.1	Pseudoalteromonas shioyasakiensis	1190813	TRUE	TRUE	FALSE	FALSE
467	GCA_011806385.1	Phaeobacter sp. HF9A	2721561	FALSE	TRUE	FALSE	TRUE
468	GCA_011650445.1	Streptomyces sp. VN1	1821625	FALSE	TRUE	FALSE	TRUE
469	GCA_002712395.1	Planctomycetaceae bacterium	2026779	TRUE	TRUE	FALSE	FALSE
470	GCA_001632105.1	Synechococcus sp. MIT S9504	1801628	TRUE	TRUE	FALSE	FALSE
471	GCA_001632075.1	Prochlorococcus marinus	1801623	TRUE	TRUE	FALSE	FALSE
472	GCA_002704965.1	Flavobacteriales bacterium	2021391	TRUE	TRUE	FALSE	FALSE
473	GCA_900109345.1	Maribacter orientalis	228957	FALSE	TRUE	FALSE	TRUE
474	GCA_013364215.1	Verrucosispora sp. NA02020	2742132	FALSE	TRUE	FALSE	TRUE
475	GCA_002729915.1	Idiomarina sp.	1874361	TRUE	TRUE	FALSE	FALSE
476	GCA_002715825.1	Roseibacillus sp.	2024856	TRUE	TRUE	FALSE	FALSE
477	GCA_002689965.1	Pseudoalteromonadaceae bacterium	2026783	TRUE	TRUE	FALSE	FALSE
478	GCA_900141885.1	Mesonia phycicola	579105	TRUE	TRUE	FALSE	FALSE
479	GCA_002688175.1	Chromatiales bacterium	2026725	TRUE	TRUE	FALSE	FALSE
480	GCA_005047595.1	Pontimicrobium aquaticum	2565367	TRUE	TRUE	FALSE	FALSE
481	GCA_005146365.1	Enterovibrio norvegicus	188144	TRUE	TRUE	FALSE	FALSE
482	GCA_000355675.1	Thalassolituus oleivorans	1298593	TRUE	TRUE	FALSE	FALSE
483	GCA_002718115.1	Idiomarina sp.	1874361	TRUE	TRUE	FALSE	FALSE
484	GCA_001631935.1	Synechococcus sp. MIT S9509	1801630	TRUE	TRUE	FALSE	FALSE
485	GCA_002695485.1	Sphingobium sp.	1912891	FALSE	TRUE	FALSE	TRUE
486	GCA_002701745.1	Flammeovirgaceae bacterium	2026740	TRUE	TRUE	FALSE	FALSE
487	GCA_002729795.1	Alteromonadaceae bacterium	1916082	TRUE	TRUE	FALSE	FALSE
488	GCA_003584015.1	Aurantiacibacter xanthus	1784712	FALSE	TRUE	FALSE	TRUE
489	GCA_002715155.1	Aequorivita sp.	1872390	TRUE	TRUE	FALSE	FALSE
490	GCA_002874375.1	Enterovibrio norvegicus	188144	TRUE	TRUE	FALSE	FALSE
491	GCA_002698675.1	Oceanospirillaceae bacterium	1899355	TRUE	TRUE	FALSE	FALSE
492	GCA_002683275.1	Phycisphaerae bacterium	2026778	TRUE	TRUE	FALSE	FALSE
493	GCA_002720945.1	Sandaracinus sp.	2024858	TRUE	TRUE	FALSE	FALSE
494	GCA_002720745.1	Balneola sp.	2024824	TRUE	TRUE	FALSE	FALSE
495	GCA_001304175.1	Anaerolineae bacterium SM23_84	1703388	TRUE	TRUE	FALSE	FALSE
496	GCA_002693945.1	Oleibacter sp.	2024845	TRUE	TRUE	FALSE	FALSE
497	GCA_002876335.1	Vibrio tasmaniensis	212663	TRUE	TRUE	FALSE	FALSE
498	GCA_004145845.1	Loktanella sp. IMCC34160	2510646	TRUE	TRUE	FALSE	FALSE
499	GCA_900156145.1	Chryseobacterium indoltheticum	254	TRUE	TRUE	FALSE	FALSE
500	GCA_002732025.1	Dehalococcoidia bacterium	2026734	TRUE	TRUE	FALSE	FALSE
501	GCA_002713555.1	Planctomycetaceae bacterium	2026779	TRUE	TRUE	FALSE	FALSE
502	GCA_002706545.1	Oceanospirillaceae bacterium	1899355	TRUE	TRUE	FALSE	FALSE
503	GCA_011044175.1	Rasiella rasia	2744027	TRUE	TRUE	FALSE	FALSE
504	GCA_004551525.1	Vibrio ouci	2499078	TRUE	TRUE	FALSE	FALSE
505	GCA_002700245.1	Verrucomicrobiales bacterium	2026801	TRUE	TRUE	FALSE	FALSE
506	GCA_005930815.1	Pseudoalteromonas sp. S979	579570	TRUE	TRUE	FALSE	FALSE
507	GCA_002689825.1	Ponticaulis sp.	2020902	TRUE	TRUE	FALSE	FALSE
508	GCA_001941605.1	Cellulophaga lytica	979	FALSE	TRUE	FALSE	TRUE
509	GCA_002693185.1	Gramella sp.	1931228	TRUE	TRUE	FALSE	FALSE
510	GCA_002691505.1	Verrucomicrobiales bacterium	2026801	TRUE	TRUE	FALSE	FALSE
511	GCA_001294685.1	Idiomarina abyssalis	86102	TRUE	TRUE	FALSE	FALSE
512	GCA_002723415.1	Chloroflexi bacterium	2026724	TRUE	TRUE	FALSE	FALSE
513	GCA_002716585.1	Myxococcales bacterium	2026763	TRUE	TRUE	FALSE	FALSE
514	GCA_001304275.1	Phycisphaerae bacterium SM1_79	1703410	TRUE	TRUE	FALSE	FALSE
515	GCA_014164345.1	Pseudoalteromonas sp. SG43-5	2760968	TRUE	TRUE	FALSE	FALSE
516	GCA_002700325.1	Yangia sp.	2024862	FALSE	TRUE	FALSE	TRUE
517	GCA_002721995.1	Chloroflexi bacterium	2026724	TRUE	TRUE	FALSE	FALSE
518	GCA_001975705.1	Salipiger abyssi	1250539	TRUE	TRUE	FALSE	FALSE
519	GCA_021764745.1	Joostella atrarenae	679257	TRUE	TRUE	FALSE	FALSE
520	GCA_002240205.1	Prosthecochloris sp. GSB1	281093	TRUE	TRUE	FALSE	FALSE
521	GCA_002706025.1	Oceanospirillaceae bacterium	1899355	TRUE	TRUE	FALSE	FALSE
522	GCA_002714805.1	Flavobacteriales bacterium	2021391	TRUE	TRUE	FALSE	FALSE
523	GCA_002686265.1	Planctomycetota bacterium	2026780	TRUE	TRUE	FALSE	FALSE
524	GCA_002707155.1	Crocinitomicaceae bacterium	2026728	TRUE	TRUE	FALSE	FALSE
525	GCA_002709005.1	Hyphomicrobiales bacterium	1909294	TRUE	TRUE	FALSE	FALSE
526	GCA_002702495.1	Verrucomicrobiales bacterium	2026801	TRUE	TRUE	FALSE	FALSE
527	GCA_014164115.1	Pseudoalteromonas sp. SG45-2	2760956	TRUE	TRUE	FALSE	FALSE
528	GCA_002691045.1	Marinovum sp.	2024839	TRUE	TRUE	FALSE	FALSE
529	GCA_002688255.1	Deltaproteobacteria bacterium	2026735	TRUE	TRUE	FALSE	FALSE
530	GCA_002694035.1	Opitutae bacterium	2026771	TRUE	TRUE	FALSE	FALSE
531	GCA_001690925.1	Aliivibrio fischeri	668	TRUE	TRUE	FALSE	FALSE
532	GCA_002731825.1	Myxococcales bacterium	2026763	TRUE	TRUE	FALSE	FALSE
533	GCA_000184325.1	Vibrio furnissii	903510	TRUE	TRUE	FALSE	FALSE
534	GCA_900142245.1	Paramaledivibacter caminithermalis	1121301	TRUE	TRUE	FALSE	FALSE
535	GCA_000024125.1	Robiginitalea biformata	313596	TRUE	TRUE	FALSE	FALSE
536	GCA_900128995.1	Loktanella atrilutea	366533	TRUE	TRUE	FALSE	FALSE
537	GCA_005146345.1	Enterovibrio norvegicus	188144	TRUE	TRUE	FALSE	FALSE
538	GCA_002686225.1	Alteromonas sp.	232	TRUE	TRUE	FALSE	FALSE
539	GCA_006383075.2	Kordia sp. TARA_039_SRF	2530203	TRUE	TRUE	FALSE	FALSE
540	GCA_002715125.1	Idiomarinaceae bacterium	1898113	TRUE	TRUE	FALSE	FALSE
541	GCA_002725695.1	Candidatus Marinimicrobia bacterium	2026760	TRUE	TRUE	FALSE	FALSE
542	GCA_012395815.1	Roseibacterium persicicum	2650661	FALSE	TRUE	FALSE	TRUE
543	GCA_004803465.1	Lewinella litorea	2562452	TRUE	TRUE	FALSE	FALSE
544	GCA_007004065.1	Paenimaribius caenipelagi	2489174	TRUE	TRUE	FALSE	FALSE
545	GCA_002720735.1	Porticoccaceae bacterium	2026782	TRUE	TRUE	FALSE	FALSE
546	GCA_002697345.1	Rhodobacteraceae bacterium	1904441	TRUE	TRUE	FALSE	FALSE
547	GCA_001631985.1	Prochlorococcus sp. MIT 1306	1799667	TRUE	TRUE	FALSE	FALSE
548	GCA_002682945.1	Cryomorphaceae bacterium	1898111	TRUE	TRUE	FALSE	FALSE
549	GCA_002683195.1	Phycisphaerae bacterium	2026778	FALSE	TRUE	FALSE	TRUE
550	GCA_002713705.1	Flavobacteriaceae bacterium	1871037	TRUE	TRUE	FALSE	FALSE
551	GCA_003259275.1	Streptomyces sp. DpondAA-E10	1305832	FALSE	TRUE	FALSE	TRUE
552	GCA_014164185.1	Shewanella sp. SG44-6	2760959	TRUE	TRUE	FALSE	FALSE
553	GCA_002694715.1	Pseudomonas sp.	306	FALSE	TRUE	FALSE	TRUE
554	GCA_000818095.1	Jeotgalibacillus malaysiensis	1508404	TRUE	TRUE	FALSE	FALSE
555	GCA_002712105.1	Kiritimatiellaceae bacterium	2026752	TRUE	TRUE	FALSE	FALSE
556	GCA_002706085.1	Alcanivoracaceae bacterium	2024895	TRUE	TRUE	FALSE	FALSE
557	GCA_013364275.1	Actinomadura sp. NAK00032	2742128	FALSE	TRUE	FALSE	TRUE
558	GCA_000783325.1	Vibrio variabilis	990271	TRUE	TRUE	FALSE	FALSE
559	GCA_002723385.1	Oceanospirillaceae bacterium	1899355	TRUE	TRUE	FALSE	FALSE
560	GCA_003863355.1	Ancylomarina euxinus	2283627	TRUE	TRUE	FALSE	FALSE
561	GCA_003609595.1	Caminicella sporogenes	1121266	TRUE	TRUE	FALSE	FALSE
562	GCA_009910845.1	Chengkuizengella marina	2507566	FALSE	TRUE	FALSE	TRUE
563	GCA_002709755.1	Phycisphaerae bacterium	2026778	TRUE	TRUE	FALSE	FALSE
564	GCA_000973155.1	Grimontia sp. AD028	1581149	TRUE	TRUE	FALSE	FALSE
565	GCA_001303765.1	Chlamydiae bacterium SM23_39	1704235	TRUE	TRUE	FALSE	FALSE
566	GCA_002729325.1	Rhodobacteraceae bacterium	1904441	TRUE	TRUE	FALSE	FALSE
567	GCA_011089875.1	Psychroflexus maritimus	2714865	TRUE	TRUE	FALSE	FALSE
568	GCA_002994635.1	Enhygromyxa salina	215803	FALSE	TRUE	FALSE	TRUE
569	GCA_000829515.1	Jeotgalibacillus campisalis	220754	TRUE	TRUE	FALSE	FALSE
570	GCA_005877035.1	Pseudoalteromonas distincta	77608	TRUE	TRUE	FALSE	FALSE
571	GCA_005930865.1	Pseudoalteromonas sp. S554	2066516	TRUE	TRUE	FALSE	FALSE
572	GCA_004348605.1	Micromonospora fluostatini	1629071	FALSE	TRUE	FALSE	TRUE
573	GCA_002707835.1	Chloroflexi bacterium	2026724	TRUE	TRUE	FALSE	FALSE
574	GCA_002701955.1	Cytophagia bacterium	2026730	TRUE	TRUE	FALSE	FALSE
575	GCA_002683995.1	Verrucomicrobiales bacterium	2026801	TRUE	TRUE	FALSE	FALSE
576	GCA_002692925.1	Hyphomonas sp.	87	TRUE	TRUE	FALSE	FALSE
577	GCA_001303605.1	Planctomycetes bacterium SM23_25	1704028	TRUE	TRUE	FALSE	FALSE
578	GCA_000260115.1	Joostella marina	926559	TRUE	TRUE	FALSE	FALSE
579	GCA_002872765.1	Vibrio sp. 10N.286.45.B6	1880852	TRUE	TRUE	FALSE	FALSE
580	GCA_002705575.1	Candidatus Marinimicrobia bacterium	2026760	TRUE	TRUE	FALSE	FALSE
581	GCA_013315265.1	Sulfitobacter algicola	2614809	TRUE	TRUE	FALSE	FALSE
582	GCA_009734345.1	Idiomarina andamanensis	1940690	TRUE	TRUE	FALSE	FALSE
583	GCA_000299875.1	Celeribacter baekdonensis	1208323	TRUE	TRUE	FALSE	FALSE
584	GCA_002713385.1	Candidatus Marinimicrobia bacterium	2026760	TRUE	TRUE	FALSE	FALSE
585	GCA_002707725.1	Kangiellaceae bacterium	2026751	TRUE	TRUE	FALSE	FALSE
586	GCA_002709545.1	Planctomyces sp.	37635	TRUE	TRUE	FALSE	FALSE
587	GCA_013364335.1	Streptomyces buecherae	2763006	FALSE	TRUE	FALSE	TRUE
588	GCA_014163535.1	Pseudoalteromonas sp. SR45-4	2760929	TRUE	TRUE	FALSE	FALSE
589	GCA_002684955.1	Tistrella sp.	2024861	FALSE	TRUE	FALSE	TRUE
590	GCA_002875905.1	Vibrio sp. 10N.261.46.F12	1880846	TRUE	TRUE	FALSE	FALSE
591	GCA_002724455.1	Verrucomicrobiaceae bacterium	2026800	TRUE	TRUE	FALSE	FALSE
592	GCA_014163665.1	Aliivibrio sp. SR45-2	2760931	TRUE	TRUE	FALSE	FALSE
593	GCA_002704045.1	Candidatus Marinimicrobia bacterium	2026760	TRUE	TRUE	FALSE	FALSE
594	GCA_002719735.1	Alcanivorax sp.	1872427	TRUE	TRUE	FALSE	FALSE
595	GCA_001635805.1	Oleiphilus sp. HI0071	1822246	TRUE	TRUE	FALSE	FALSE
596	GCA_002690905.1	Rhodobacteraceae bacterium	1904441	TRUE	TRUE	FALSE	FALSE
597	GCA_900129175.1	Marinitoga hydrogenitolerans	1122195	TRUE	TRUE	FALSE	FALSE
598	GCA_002685155.1	Myxococcales bacterium	2026763	TRUE	TRUE	FALSE	FALSE
599	GCA_003269425.1	Muricauda aurantiaca	1383885	TRUE	TRUE	FALSE	FALSE
600	GCA_001635155.1	Sulfitobacter sp. HI0082	1822257	FALSE	TRUE	FALSE	TRUE
601	GCA_001767295.1	Colwellia sp. PAMC 20917	1816218	TRUE	TRUE	FALSE	FALSE
602	GCA_000265385.1	Aequorivita sublithincola	746697	TRUE	TRUE	FALSE	FALSE
603	GCA_001635225.1	Oleiphilus sp. HI0086	1822260	TRUE	TRUE	FALSE	FALSE
604	GCA_900176595.1	Aquiflexum balticum	758820	FALSE	TRUE	FALSE	TRUE
605	GCA_900109075.1	Myroides marinus	703342	TRUE	TRUE	FALSE	FALSE
606	GCA_900112595.1	Algibacter pectinivorans	870482	TRUE	TRUE	FALSE	FALSE
607	GCA_014163715.1	Shewanella sp. SR44-4	2760935	TRUE	TRUE	FALSE	FALSE
608	GCA_001974575.1	Vibrio sp. 10N.261.45.E1	1903177	TRUE	TRUE	FALSE	FALSE
609	GCA_002730255.1	Halieaceae bacterium	2026743	TRUE	TRUE	FALSE	FALSE
610	GCA_008014675.1	Lewinella aurantiaca	2602767	TRUE	TRUE	FALSE	FALSE
611	GCA_014163735.1	Shewanella sp. SR44-3	2760936	TRUE	TRUE	FALSE	FALSE
612	GCA_900116285.1	Sulfitobacter marinus	394264	FALSE	TRUE	FALSE	TRUE
613	GCA_002719515.1	Haliea sp.	1932666	TRUE	TRUE	FALSE	FALSE
614	GCA_002875485.1	Vibrio sp. 10N.222.54.B6	1884468	TRUE	TRUE	FALSE	FALSE
615	GCA_002703245.1	Microbacterium sp.	51671	FALSE	TRUE	FALSE	TRUE
616	GCA_014163885.1	Pseudoalteromonas sp. SR43-2	2760944	TRUE	TRUE	FALSE	FALSE
617	GCA_900129005.1	Leeuwenhoekiella marinoflava	1122159	TRUE	TRUE	FALSE	FALSE
618	GCA_002875685.1	Vibrio sp. 10N.261.45.E11	1880843	TRUE	TRUE	FALSE	FALSE
619	GCA_001635175.1	Alcanivorax sp. HI0083	1822258	TRUE	TRUE	FALSE	FALSE
620	GCA_002697225.1	Candidatus Poribacteria bacterium	2026781	TRUE	TRUE	FALSE	FALSE
621	GCA_001635765.1	Oleiphilus sp. HI0068	1822244	TRUE	TRUE	FALSE	FALSE
622	GCA_002698785.1	Verrucomicrobiales bacterium	2026801	FALSE	TRUE	FALSE	TRUE
623	GCA_000153485.2	Psychroflexus torquis	313595	TRUE	TRUE	FALSE	FALSE
624	GCA_007859325.1	Luteimonas marina	488485	TRUE	TRUE	FALSE	FALSE
625	GCA_003369575.1	Oceanobacillus arenosus	1229153	TRUE	TRUE	FALSE	FALSE
626	GCA_002711615.1	Rhodothermaceae bacterium	2026787	TRUE	TRUE	FALSE	FALSE
627	GCA_002702065.1	Anaerolineaceae bacterium	2024896	FALSE	TRUE	TRUE	FALSE
628	GCA_002738205.1	Hahellaceae bacterium	2048971	FALSE	TRUE	FALSE	TRUE
629	GCA_002874745.1	Vibrio lentus	136468	TRUE	TRUE	FALSE	FALSE
630	GCA_002706885.1	Phycisphaerae bacterium	2026778	TRUE	TRUE	FALSE	FALSE
631	GCA_002119585.1	Vibrio alginolyticus	663	TRUE	TRUE	FALSE	FALSE
632	GCA_001302805.1	candidate division KD3-62 bacterium DG_56	1704032	TRUE	TRUE	FALSE	FALSE
633	GCA_002706985.1	Sneathiella sp.	1964365	FALSE	TRUE	FALSE	TRUE
634	GCA_013376415.1	Muricauda chongwuensis	2697365	TRUE	TRUE	FALSE	FALSE
635	GCA_002722315.1	Xanthomonadales bacterium	2006849	TRUE	TRUE	FALSE	FALSE
636	GCA_002719595.1	Verrucomicrobiales bacterium	2026801	TRUE	TRUE	FALSE	FALSE
637	GCA_009867075.1	Streptomyces sp. NHF165	2175864	FALSE	TRUE	FALSE	TRUE
638	GCA_014077095.1	Colwellia sp. MB02u-6	2759824	TRUE	TRUE	FALSE	FALSE
639	GCA_014076925.1	Colwellia sp. MB02u-11	2759816	TRUE	TRUE	FALSE	FALSE
640	GCA_001303805.1	candidate division WOR_3 bacterium SM23_60	1703780	TRUE	TRUE	FALSE	FALSE
641	GCA_002726935.1	Candidatus Saccharibacteria bacterium	2026720	TRUE	TRUE	FALSE	FALSE
642	GCA_900167435.1	Marinactinospora thermotolerans	1122192	FALSE	TRUE	FALSE	TRUE
643	GCA_002729845.1	Alcanivorax sp.	1872427	TRUE	TRUE	FALSE	FALSE
644	GCA_002726945.1	Deltaproteobacteria bacterium	2026735	TRUE	TRUE	FALSE	FALSE
645	GCA_002709825.1	Xanthomonadales bacterium	2006849	TRUE	TRUE	FALSE	FALSE
646	GCA_002726335.1	Gemmatimonadaceae bacterium	2026741	TRUE	TRUE	FALSE	FALSE
647	GCA_002693685.1	Leeuwenhoekiella sp.	1977054	TRUE	TRUE	FALSE	FALSE
648	GCA_014117385.1	Pseudoalteromonas sp. MT33b	2759705	TRUE	TRUE	FALSE	FALSE
649	GCA_000166295.1	Marinobacter adhaerens	225937	TRUE	TRUE	FALSE	FALSE
650	GCA_000158115.1	Vibrio sp. 16	391586	TRUE	TRUE	FALSE	FALSE
651	GCA_002093115.1	Geothermobacter hydrogeniphilus	1969733	TRUE	TRUE	FALSE	FALSE
652	GCA_014164055.1	Shewanella sp. SR41-2	2760951	TRUE	TRUE	FALSE	FALSE
653	GCA_000740745.1	Nitrosococcus oceani	314279	TRUE	TRUE	FALSE	FALSE
654	GCA_005930855.1	Pseudoalteromonas sp. S980	579571	TRUE	TRUE	FALSE	FALSE
655	GCA_002708795.1	Paracoccus sp.	267	TRUE	TRUE	FALSE	FALSE
656	GCA_001304445.1	Acidithiobacillales bacterium SG8_45	1703383	TRUE	TRUE	FALSE	FALSE
657	GCA_002727035.1	Methylobacterium sp.	409	FALSE	TRUE	FALSE	TRUE
658	GCA_009735555.1	Labilibaculum euxinus	2686357	TRUE	TRUE	FALSE	FALSE
659	GCA_001458195.1	Ruegeria atlantica	81569	TRUE	TRUE	FALSE	FALSE
660	GCA_900114595.1	Desulfomicrobium norvegicum	52561	TRUE	TRUE	FALSE	FALSE
661	GCA_011806405.1	Pseudooceanicola sp. HF7	2721560	TRUE	TRUE	FALSE	FALSE
662	GCA_002729295.1	Verrucomicrobiales bacterium	2026801	TRUE	TRUE	FALSE	FALSE
663	GCA_014349155.1	Lewinella lacunae	1517758	FALSE	TRUE	FALSE	TRUE
664	GCA_002149085.1	Vibrio alginolyticus	663	TRUE	TRUE	FALSE	FALSE
665	GCA_002873045.1	Vibrio sp. 10N.286.46.E10	1884477	TRUE	TRUE	FALSE	FALSE
666	GCA_002715105.1	Balneola sp.	2024824	TRUE	TRUE	FALSE	FALSE
667	GCA_002954645.1	Polaribacter gangjinensis	574710	TRUE	TRUE	FALSE	FALSE
668	GCA_002731695.1	Porticoccaceae bacterium	2026782	TRUE	TRUE	FALSE	FALSE
669	GCA_014077215.1	Colwellia sp. MB02u-1	2759829	TRUE	TRUE	FALSE	FALSE
670	GCA_001632045.1	Prochlorococcus marinus	1801622	TRUE	TRUE	FALSE	FALSE
671	GCA_014077125.1	Colwellia sp. MB02u-18	2759826	TRUE	TRUE	FALSE	FALSE
672	GCA_900129165.1	Anaerotignum propionicum	991789	TRUE	TRUE	FALSE	FALSE
673	GCA_000213655.1	Alteromonas naphthalenivorans	715451	TRUE	TRUE	FALSE	FALSE
674	GCA_002715365.1	Myxococcales bacterium	2026763	TRUE	TRUE	FALSE	FALSE
675	GCA_900114125.1	Nereida ignava	1122600	FALSE	TRUE	FALSE	TRUE
676	GCA_002696485.1	Altibacter sp.	2024823	TRUE	TRUE	FALSE	FALSE
677	GCA_002710725.1	Spongiibacteraceae bacterium	2026793	TRUE	TRUE	FALSE	FALSE
678	GCA_002731335.1	Alcanivorax sp.	1872427	TRUE	TRUE	FALSE	FALSE
679	GCA_000153065.1	Synechococcus sp. RS9917	221360	TRUE	TRUE	FALSE	FALSE
680	GCA_009363315.1	Labrenzia sp. THAF191b	2587867	FALSE	TRUE	FALSE	TRUE
681	GCA_001403915.1	Roseibium aggregatum	187304	FALSE	TRUE	FALSE	TRUE
682	GCA_002725515.1	Dehalococcoidia bacterium	2026734	TRUE	TRUE	FALSE	FALSE
683	GCA_000348905.1	Bhargavaea cecembensis	1235279	TRUE	TRUE	FALSE	FALSE
684	GCA_001302785.1	candidate division WOR-1 bacterium DG_54_3	1703775	TRUE	TRUE	FALSE	FALSE
685	GCA_012395805.1	Labrenzia sp. 5N	2723402	FALSE	TRUE	FALSE	TRUE
686	GCA_001050835.1	Crocosphaera watsonii	423472	TRUE	TRUE	FALSE	FALSE
687	GCA_002695785.1	Hyphomonas sp.	87	TRUE	TRUE	FALSE	FALSE
688	GCA_002717635.1	Crocinitomicaceae bacterium	2026728	TRUE	TRUE	FALSE	FALSE
689	GCA_014077085.1	Colwellia sp. MB02u-9	2759823	TRUE	TRUE	FALSE	FALSE
690	GCA_002711465.1	Candidatus Marinimicrobia bacterium	2026760	TRUE	TRUE	FALSE	FALSE
691	GCA_014297465.1	Ramlibacter sp. USB13	2764187	TRUE	TRUE	FALSE	FALSE
692	GCA_002700705.1	Candidatus Marinimicrobia bacterium	2026760	TRUE	TRUE	FALSE	FALSE
693	GCA_014279555.1	Synechococcus sp. SYN20	1050714	TRUE	TRUE	FALSE	FALSE
694	GCA_002686945.1	Planctomycetota bacterium	2026780	TRUE	TRUE	FALSE	FALSE
695	GCA_001634725.1	Sulfitobacter sp. HI0021	1822224	FALSE	TRUE	FALSE	TRUE
696	GCA_001304225.1	candidate division Zixibacteria bacterium SM1_73	1703424	TRUE	TRUE	FALSE	FALSE
697	GCA_009709615.1	Winogradskyella ouciana	2608631	FALSE	TRUE	FALSE	TRUE
698	GCA_011759385.1	Oleiagrimonas sp. C23AA	2719047	TRUE	TRUE	FALSE	FALSE
699	GCA_013364155.1	Streptomyces sp. NA02950	2742137	FALSE	TRUE	FALSE	TRUE
700	GCA_002876325.1	Vibrio sp. 10N.261.52.A1	1880849	TRUE	TRUE	FALSE	FALSE
701	GCA_002724235.1	Opitutales bacterium	2026772	TRUE	TRUE	FALSE	FALSE
702	GCA_900100315.1	Streptomyces indicus	417292	FALSE	TRUE	FALSE	TRUE
703	GCA_007859755.1	Blastopirellula retiformator	2527970	TRUE	TRUE	FALSE	FALSE
704	GCA_001663395.1	Staphylococcus sp. AntiMn-1	1715860	TRUE	TRUE	FALSE	FALSE
705	GCA_002690925.1	Rhodopirellula sp.	2024855	TRUE	TRUE	FALSE	FALSE
706	GCA_002711455.1	Muricauda sp.	192149	FALSE	TRUE	FALSE	TRUE
707	GCA_014905135.1	Sulfurimonas paralvinellae	317658	TRUE	TRUE	FALSE	FALSE
708	GCA_004005565.1	Lujinxingia sediminis	2480984	TRUE	TRUE	FALSE	FALSE
709	GCA_001302885.1	Spirochaetes bacterium DG_61	1704237	TRUE	TRUE	FALSE	FALSE
710	GCA_014163845.1	Shewanella sp. SR43-4	2760942	TRUE	TRUE	FALSE	FALSE
711	GCA_900188395.1	Desulfurobacterium atlanticum	240169	TRUE	TRUE	FALSE	FALSE
712	GCA_002723335.1	Haliea sp.	1932666	TRUE	TRUE	FALSE	FALSE
713	GCA_002708925.1	Rhodobacteraceae bacterium	1904441	FALSE	TRUE	FALSE	TRUE
714	GCA_900129785.1	Algoriphagus halophilus	226505	FALSE	TRUE	FALSE	TRUE
715	GCA_001458335.1	Cognatishimia activa	1715691	FALSE	TRUE	TRUE	FALSE
716	GCA_000212355.1	Dokdonia sp. 4H-3-7-5	983548	TRUE	TRUE	FALSE	FALSE
717	GCA_002874195.1	Vibrio sp. 10N.286.45.E10	1884476	TRUE	TRUE	FALSE	FALSE
718	GCA_002720975.1	Planctomycetota bacterium	2026780	TRUE	TRUE	FALSE	FALSE
719	GCA_007558815.1	Verticiella sediminum	1247510	FALSE	TRUE	FALSE	TRUE
720	GCA_000816465.4	Streptomyces pluripotens	1355015	FALSE	TRUE	FALSE	TRUE
721	GCA_900107255.1	Micromonospora pattaloongensis	405436	FALSE	TRUE	FALSE	TRUE
722	GCA_002703575.1	Crocinitomicaceae bacterium	2026728	TRUE	TRUE	FALSE	FALSE
723	GCA_002704555.1	Deltaproteobacteria bacterium	2026735	TRUE	TRUE	FALSE	FALSE
724	GCA_002699585.1	Anaerolineaceae bacterium	2024896	TRUE	TRUE	FALSE	FALSE
725	GCA_002722935.1	Phycisphaerae bacterium	2026778	TRUE	TRUE	FALSE	FALSE
726	GCA_002009175.1	Streptomyces niveus	193462	FALSE	TRUE	FALSE	TRUE
727	GCA_002716165.1	Deltaproteobacteria bacterium	2026735	TRUE	TRUE	FALSE	FALSE
728	GCA_002703145.1	Puniceicoccaceae bacterium	2026784	TRUE	TRUE	FALSE	FALSE
729	GCA_002876915.1	Vibrio sp. 10N.261.49.E11	1880848	TRUE	TRUE	FALSE	FALSE
730	GCA_002072955.1	Methyloprofundus sedimenti	1420851	TRUE	TRUE	FALSE	FALSE
731	GCA_900110425.1	Salinihabitans flavidus	569882	TRUE	TRUE	FALSE	FALSE
732	GCA_002724155.1	Crocinitomicaceae bacterium	2026728	TRUE	TRUE	FALSE	FALSE
733	GCA_014077195.1	Colwellia sp. BRX9-1	2759830	TRUE	TRUE	FALSE	FALSE
734	GCA_014164325.1	Pseudoalteromonas sp. SG43-4	2760969	TRUE	TRUE	FALSE	FALSE
735	GCA_900111025.1	Hyunsoonleella jejuensis	419940	TRUE	TRUE	FALSE	FALSE
736	GCA_000152485.1	Vibrio antiquarius	150340	TRUE	TRUE	FALSE	FALSE
737	GCA_900188325.1	Ekhidna lutea	447679	TRUE	TRUE	FALSE	FALSE
738	GCA_003173795.1	Pseudoalteromonas sp. meg-B1	2203192	TRUE	TRUE	FALSE	FALSE
739	GCA_001889605.1	Aquibium oceanicum	1670800	TRUE	TRUE	FALSE	FALSE
740	GCA_002688235.1	Erythrobacteraceae bacterium	2026738	TRUE	TRUE	FALSE	FALSE
741	GCA_002731535.1	Planctomycetaceae bacterium	2026779	TRUE	TRUE	FALSE	FALSE
742	GCA_002711245.1	Halobacteriovoraceae bacterium	2026745	TRUE	TRUE	FALSE	FALSE
743	GCA_014164535.1	Pseudoalteromonas sp. SG41-2	2760978	TRUE	TRUE	FALSE	FALSE
744	GCA_002689335.1	Verrucomicrobiales bacterium	2026801	TRUE	TRUE	FALSE	FALSE
745	GCA_002684295.1	Idiomarina sp.	1874361	TRUE	TRUE	FALSE	FALSE
746	GCA_002710665.1	Sutterellaceae bacterium	2026794	TRUE	TRUE	FALSE	FALSE
747	GCA_002694765.1	Xanthomarina sp.	1931211	TRUE	TRUE	FALSE	FALSE
748	GCA_004104355.1	Photobacterium chitinilyticum	2485123	TRUE	TRUE	FALSE	FALSE
749	GCA_002709085.1	Pseudooceanicola sp.	1914328	FALSE	TRUE	FALSE	TRUE
750	GCA_012933585.1	unclassified	1218	TRUE	TRUE	FALSE	FALSE
751	GCA_002696965.1	Flavobacteriales bacterium	2021391	TRUE	TRUE	FALSE	FALSE
752	GCA_002688155.1	Phycisphaerae bacterium	2026778	TRUE	TRUE	FALSE	FALSE
753	GCA_002693575.1	Alteromonas sp.	232	TRUE	TRUE	FALSE	FALSE
754	GCA_002703505.1	Candidatus Marinimicrobia bacterium	2026760	TRUE	TRUE	FALSE	FALSE
755	GCA_002708845.1	Leeuwenhoekiella sp.	1977054	TRUE	TRUE	FALSE	FALSE
756	GCA_002727915.1	Verrucomicrobiales bacterium	2026801	TRUE	TRUE	FALSE	FALSE
757	GCA_001886435.1	Alteromonas mediterranea	314275	TRUE	TRUE	FALSE	FALSE
758	GCA_002686595.1	Planctomycetota bacterium	2026780	TRUE	TRUE	FALSE	FALSE
759	GCA_002698575.1	Pimelobacter sp.	51662	TRUE	TRUE	FALSE	FALSE
760	GCA_002873335.1	Vibrio sp. 10N.286.49.B1	1880854	TRUE	TRUE	FALSE	FALSE
761	GCA_004104075.1	Leeuwenhoekiella polynyae	1550906	TRUE	TRUE	FALSE	FALSE
762	GCA_002729415.1	Candidatus Poribacteria bacterium	2026781	FALSE	TRUE	FALSE	TRUE
763	GCA_002708395.1	Dehalococcoidia bacterium	2026734	TRUE	TRUE	FALSE	FALSE
764	GCA_001886815.1	Caldithrix abyssi	880073	FALSE	TRUE	FALSE	TRUE
765	GCA_900142235.1	Tepidibacter formicigenes	1123349	TRUE	TRUE	FALSE	FALSE
766	GCA_900115615.1	Hydrogenimonas thermophila	223786	TRUE	TRUE	FALSE	FALSE
767	GCA_012910715.1	Flavivirga algicola	2729136	FALSE	TRUE	TRUE	FALSE
768	GCA_014076835.1	Colwellia sp. MB3u-64	2759809	TRUE	TRUE	FALSE	FALSE
769	GCA_005930805.1	Pseudoalteromonas sp. S981	579569	TRUE	TRUE	FALSE	FALSE
770	GCA_001652585.1	Thermosulfurimonas dismutans	999894	TRUE	TRUE	FALSE	FALSE
771	GCA_014077065.1	Colwellia sp. MB3u-4	2759822	TRUE	TRUE	FALSE	FALSE
772	GCA_002082175.1	Streptomyces violaceoruber	1935	FALSE	TRUE	FALSE	TRUE
773	GCA_001634835.1	Alcanivorax sp. HI0033	1822228	TRUE	TRUE	FALSE	FALSE
774	GCA_004212215.1	Leptolyngbya sp. LK	2294035	TRUE	TRUE	FALSE	FALSE
775	GCA_001303305.1	Nitrospira bacterium SG8_35_1	1704024	TRUE	TRUE	FALSE	FALSE
776	GCA_002692965.1	Haliea sp.	1932666	TRUE	TRUE	FALSE	FALSE
777	GCA_002699265.1	Flavobacteriaceae bacterium	1871037	TRUE	TRUE	FALSE	FALSE
778	GCA_003025575.1	Photobacterium aphoticum	754436	TRUE	TRUE	FALSE	FALSE
779	GCA_010681825.2	Sulfuriroseicoccus oceanibius	2707525	TRUE	TRUE	FALSE	FALSE
780	GCA_004378355.1	Psychromonas sp. RZ5	2555642	TRUE	TRUE	FALSE	FALSE
781	GCA_014163655.1	Pseudoalteromonas sp. SR45-1	2760932	TRUE	TRUE	FALSE	FALSE
782	GCA_001913155.1	Maribacter hydrothermalis	1836467	TRUE	TRUE	FALSE	FALSE
783	GCA_000341895.1	Pseudodesulfovibrio piezophilus	1322246	FALSE	TRUE	FALSE	TRUE
784	GCA_002685035.1	Alteromonadaceae bacterium	1916082	TRUE	TRUE	FALSE	FALSE
785	GCA_001697185.1	Wenyingzhuangia fucanilytica	1790137	TRUE	TRUE	FALSE	FALSE
786	GCA_900115205.1	Robiginitalea myxolifaciens	400055	TRUE	TRUE	FALSE	FALSE
787	GCA_002696525.1	Candidatus Marinimicrobia bacterium	2026760	TRUE	TRUE	FALSE	FALSE
788	GCA_000267545.1	Stutzerimonas stutzeri	1196835	FALSE	TRUE	FALSE	TRUE
789	GCA_002724285.1	Verrucomicrobiales bacterium	2026801	TRUE	TRUE	FALSE	FALSE
790	GCA_009711355.1	Roseibium sp. RKSG952	2529384	FALSE	TRUE	FALSE	TRUE
791	GCA_014163945.1	Pseudoalteromonas sp. SR41-6	2760948	TRUE	TRUE	FALSE	FALSE
792	GCA_002722845.1	Myxococcales bacterium	2026763	TRUE	TRUE	FALSE	FALSE
793	GCA_900100085.1	Salipiger marinus	555512	FALSE	TRUE	FALSE	TRUE
794	GCA_014164245.1	Pseudoalteromonas sp. SG43-8	2760965	TRUE	TRUE	FALSE	FALSE
795	GCA_000764555.1	Francisella sp. FSC1006	1547445	TRUE	TRUE	FALSE	FALSE
796	GCA_002876665.1	Vibrio sp. 10N.222.55.F9	1884471	TRUE	TRUE	FALSE	FALSE
797	GCA_001304075.1	candidate division BRC1 bacterium SM23_51	1703761	TRUE	TRUE	FALSE	FALSE
798	GCA_001855515.1	Micromonospora sp. WMMB235	1172030	FALSE	TRUE	FALSE	TRUE
799	GCA_002726175.1	Aequorivita sp.	1872390	TRUE	TRUE	FALSE	FALSE
800	GCA_002703645.1	Candidatus Marinimicrobia bacterium	2026760	TRUE	TRUE	FALSE	FALSE
801	GCA_001303205.1	Nitrospira bacterium SG8_3	1704023	TRUE	TRUE	FALSE	FALSE
802	GCA_009363375.1	Labrenzia sp. THAF187b	2587864	FALSE	TRUE	FALSE	TRUE
803	GCA_002700185.1	Pseudozobellia sp.	2024854	TRUE	TRUE	FALSE	FALSE
804	GCA_002730045.1	Sutterellaceae bacterium	2026794	TRUE	TRUE	FALSE	FALSE
805	GCA_002707765.1	Candidatus Marinimicrobia bacterium	2026760	TRUE	TRUE	FALSE	FALSE
806	GCA_002875705.1	Vibrio sp. 10N.261.45.E2	1880844	TRUE	TRUE	FALSE	FALSE
807	GCA_002710685.1	Cytophagaceae bacterium	2026729	TRUE	TRUE	FALSE	FALSE
808	GCA_002711995.1	Halobacteriovoraceae bacterium	2026745	FALSE	TRUE	FALSE	TRUE
809	GCA_002685475.1	Flammeovirgaceae bacterium	2026740	TRUE	TRUE	FALSE	FALSE
810	GCA_007859935.1	Posidoniimonas polymericola	2528002	FALSE	TRUE	FALSE	TRUE
811	GCA_002701115.1	Legionellales bacterium	2026754	TRUE	TRUE	FALSE	FALSE
812	GCA_002714565.1	Rhodopirellula sp.	2024855	TRUE	TRUE	FALSE	FALSE
813	GCA_002714325.1	Crocinitomicaceae bacterium	2026728	TRUE	TRUE	FALSE	FALSE
814	GCA_014076985.1	Colwellia sp. MB3u-8	2759818	TRUE	TRUE	FALSE	FALSE
815	GCA_014076995.1	Colwellia sp. MB3u-43	2759821	TRUE	TRUE	FALSE	FALSE
816	GCA_002876705.1	Enterovibrio norvegicus	188144	TRUE	TRUE	FALSE	FALSE
817	GCA_002712565.1	Gemmatimonadetes bacterium	2026742	TRUE	TRUE	FALSE	FALSE
818	GCA_004376845.1	Psychromonas sp. RZ22	2555643	TRUE	TRUE	FALSE	FALSE
819	GCA_002712905.1	Verrucomicrobiaceae bacterium	2026800	TRUE	TRUE	FALSE	FALSE
820	GCA_002700465.1	Flavobacteriaceae bacterium	1871037	TRUE	TRUE	FALSE	FALSE
821	GCA_000310105.2	Pseudoalteromonas sp. Bsw20308	283699	TRUE	TRUE	FALSE	FALSE
822	GCA_002702315.1	SAR116 cluster bacterium	2024888	TRUE	TRUE	FALSE	FALSE
823	GCA_008064665.1	Parahaliea aestuarii	1852021	TRUE	TRUE	FALSE	FALSE
824	GCA_002720355.1	Verrucomicrobiales bacterium	2026801	TRUE	TRUE	FALSE	FALSE
825	GCA_001304355.1	Planctomycetes bacterium DG_58	1703415	TRUE	TRUE	FALSE	FALSE
826	GCA_014164295.1	Pseudoalteromonas sp. SG43-7	2760966	TRUE	TRUE	FALSE	FALSE
827	GCA_001302835.1	candidate division TA06 bacterium DG_24	1703770	TRUE	TRUE	FALSE	FALSE
828	GCA_002723655.1	Sphingomonadaceae bacterium	1930536	TRUE	TRUE	FALSE	FALSE
829	GCA_003076275.1	Microbulbifer sp. A4B17	359370	FALSE	TRUE	FALSE	TRUE
830	GCA_002685935.1	Planctomycetaceae bacterium	2026779	FALSE	TRUE	FALSE	TRUE
831	GCA_001302865.1	Coxiella sp. DG_40	1703354	TRUE	TRUE	FALSE	FALSE
832	GCA_002684575.1	Verrucomicrobiales bacterium	2026801	TRUE	TRUE	FALSE	FALSE
833	GCA_002713265.1	Acidobacteria bacterium	1978231	TRUE	TRUE	FALSE	FALSE
834	GCA_002697595.1	Candidatus Marinimicrobia bacterium	2026760	TRUE	TRUE	FALSE	FALSE
835	GCA_001303415.1	Myxococcales bacterium SG8_38	1703407	TRUE	TRUE	FALSE	FALSE
836	GCA_014077045.1	Colwellia sp. MB3u-70	2759819	TRUE	TRUE	FALSE	FALSE
837	GCA_005518135.1	Pelagicola litoralis	420403	TRUE	TRUE	FALSE	FALSE
838	GCA_002684115.1	Pseudoalteromonas sp.	53249	TRUE	TRUE	FALSE	FALSE
839	GCA_002994615.1	Enhygromyxa salina	215803	TRUE	TRUE	FALSE	FALSE
840	GCA_001303705.1	candidate division TA06 bacterium SM23_40	1703774	TRUE	TRUE	FALSE	FALSE
841	GCA_000738435.1	Planktomarina temperata	666509	TRUE	TRUE	FALSE	FALSE
842	GCA_014270105.1	Hyunsoonleella aquatilis	2762758	FALSE	TRUE	FALSE	TRUE
843	GCA_002708665.1	Rickettsiales bacterium	2026788	TRUE	TRUE	FALSE	FALSE
844	GCA_002723015.1	Roseibacillus sp.	2024856	TRUE	TRUE	FALSE	FALSE
845	GCA_001690945.1	Aliivibrio fischeri	668	TRUE	TRUE	FALSE	FALSE
846	GCA_002689135.1	Porticoccaceae bacterium	2026782	TRUE	TRUE	FALSE	FALSE
847	GCA_002701375.1	Cyanobium sp. NAT70	2024872	TRUE	FALSE	FALSE	TRUE
848	GCA_002698365.1	Flavobacteriales bacterium	2021391	TRUE	TRUE	FALSE	FALSE
849	GCA_002727005.1	Leeuwenhoekiella sp.	1977054	TRUE	TRUE	FALSE	FALSE
850	GCA_001303025.1	Deltaproteobacteria bacterium SG8_13	1703398	TRUE	TRUE	FALSE	FALSE
851	GCA_002721535.1	Oceanospirillaceae bacterium	1899355	TRUE	TRUE	FALSE	FALSE
852	GCA_000161755.1	Citreicella sp. SE45	501479	FALSE	TRUE	FALSE	TRUE
853	GCA_002729835.1	Synechococcus sp. NP17	2024885	TRUE	FALSE	FALSE	TRUE
854	GCA_006439335.1	Litorilituus lipolyticus	2491017	TRUE	TRUE	FALSE	FALSE
855	GCA_000183745.1	Oceanithermus profundus	670487	TRUE	TRUE	FALSE	FALSE
856	GCA_000363985.1	Pseudoalteromonas agarivorans	1307437	TRUE	TRUE	FALSE	FALSE
857	GCA_001304505.1	Bacteroides sp. SM23_62_1	1703353	TRUE	TRUE	FALSE	FALSE
858	GCA_000224085.1	Muricauda ruestringensis	886377	TRUE	TRUE	FALSE	FALSE
859	GCA_002686085.1	Roseibacillus sp.	2024856	TRUE	TRUE	FALSE	FALSE
860	GCA_001632005.1	Prochlorococcus marinus	1801621	TRUE	TRUE	FALSE	FALSE
861	GCA_002694095.1	Micrococcales bacterium	2026762	TRUE	TRUE	FALSE	FALSE
862	GCA_002699125.1	Anaerolineaceae bacterium	2024896	FALSE	TRUE	FALSE	TRUE
863	GCA_001683415.1	Vibrio cholerae	412614	TRUE	TRUE	FALSE	FALSE
864	GCA_013283425.1	Marinobacterium sp. xm-a-127	2497736	TRUE	TRUE	FALSE	FALSE
865	GCA_002722875.1	Acidobacteria bacterium	1978231	TRUE	TRUE	FALSE	FALSE
866	GCA_002687445.1	Herbaspirillum sp.	1890675	TRUE	TRUE	FALSE	FALSE
867	GCA_011602365.1	Aestuariicella hydrocarbonica	1470433	TRUE	TRUE	FALSE	FALSE
868	GCA_002877645.1	Vibrio lentus	136468	TRUE	TRUE	FALSE	FALSE
869	GCA_002705055.1	Planctomycetota bacterium	2026780	TRUE	TRUE	FALSE	FALSE
870	GCA_013004065.1	Limnobacter sp. SAORIC-580	2732163	TRUE	TRUE	FALSE	FALSE
871	GCA_002729115.1	Crocinitomicaceae bacterium	2026728	TRUE	TRUE	FALSE	FALSE
872	GCA_001304045.1	Bacteroides sp. SM1_62	1703351	TRUE	TRUE	FALSE	FALSE
873	GCA_000950005.1	Photobacterium angustum	661	TRUE	TRUE	FALSE	FALSE
874	GCA_002728215.1	bacterium	1869227	TRUE	TRUE	FALSE	FALSE
875	GCA_900129985.1	Thermosipho atlanticus	1123380	TRUE	TRUE	FALSE	FALSE
876	GCA_001267955.1	Roseivirga seohaensis	1566026	TRUE	TRUE	FALSE	FALSE
877	GCA_002009255.1	Halomonas sp. 'Soap Lake #7'	1962264	FALSE	TRUE	FALSE	TRUE
878	GCA_002693775.1	Crocinitomicaceae bacterium	2026728	TRUE	TRUE	FALSE	FALSE
879	GCA_014164425.1	Pseudoalteromonas sp. SG41-8	2760972	TRUE	TRUE	FALSE	FALSE
880	GCA_000463345.3	Serratia sp. ATCC 39006	104623	FALSE	TRUE	FALSE	TRUE
881	GCA_002149065.1	Vibrio alginolyticus	663	TRUE	TRUE	FALSE	FALSE
882	GCA_014077505.1	Colwellia sp. BRX10-3	2759844	TRUE	TRUE	FALSE	FALSE
883	GCA_005116665.1	unclassified	44011	TRUE	TRUE	FALSE	FALSE
884	GCA_002729375.1	Alteromonas sp.	232	TRUE	TRUE	FALSE	FALSE
885	GCA_001730205.1	Aeromonas caviae	648	TRUE	TRUE	FALSE	FALSE
886	GCA_003172915.1	Meridianimarinicoccus roseus	2072018	TRUE	TRUE	FALSE	FALSE
887	GCA_014163565.1	Pseudoalteromonas sp. SR45-5	2760928	TRUE	TRUE	FALSE	FALSE
888	GCA_001691105.1	Aliivibrio fischeri	668	TRUE	TRUE	FALSE	FALSE
889	GCA_014779715.1	Streptomyces chumphonensis	1214925	FALSE	TRUE	FALSE	TRUE
890	GCA_002224445.1	Arthrobacter sp. 7749	2020130	FALSE	TRUE	FALSE	TRUE
891	GCA_002720825.1	Verrucomicrobiales bacterium	2026801	TRUE	TRUE	FALSE	FALSE
892	GCA_002693365.1	Candidatus Marinimicrobia bacterium	2026760	TRUE	TRUE	FALSE	FALSE
893	GCA_900112295.1	Muricauda antarctica	1055723	TRUE	TRUE	FALSE	FALSE
894	GCA_002720035.1	Verrucomicrobiaceae bacterium	2026800	TRUE	TRUE	FALSE	FALSE
895	GCA_002702655.1	Planctomycetaceae bacterium	2026779	TRUE	TRUE	FALSE	FALSE
896	GCA_009363335.1	Labrenzia sp. THAF191a	2587866	FALSE	TRUE	FALSE	TRUE
897	GCA_002720475.1	Roseovarius sp.	1486281	TRUE	TRUE	FALSE	FALSE
898	GCA_002684605.1	Pelagibacterales bacterium	2026776	TRUE	TRUE	FALSE	FALSE
899	GCA_012933595.1	unclassified	1218	TRUE	TRUE	FALSE	FALSE
900	GCA_002706305.1	Verrucomicrobiales bacterium	2026801	TRUE	TRUE	FALSE	FALSE
901	GCA_002728805.1	Alteromonas sp.	232	TRUE	TRUE	FALSE	FALSE
902	GCA_002709405.1	Rhodobacteraceae bacterium	1904441	TRUE	TRUE	FALSE	FALSE
903	GCA_002686885.1	Pedosphaera sp.	2024890	TRUE	TRUE	FALSE	FALSE
904	GCA_002684175.1	Synechococcus sp. CPC35	2024880	TRUE	TRUE	FALSE	FALSE
905	GCA_002691825.1	Porticoccaceae bacterium	2026782	TRUE	TRUE	FALSE	FALSE
906	GCA_002721625.1	Rheinheimera sp.	1869214	TRUE	TRUE	FALSE	FALSE
907	GCA_002712175.1	Roseovarius sp.	1486281	FALSE	TRUE	FALSE	TRUE
908	GCA_001303665.1	Phycisphaerae bacterium SM23_33	1703412	TRUE	TRUE	FALSE	FALSE
909	GCA_002873395.1	Vibrio sp. 10N.286.49.B3	1880855	TRUE	TRUE	FALSE	FALSE
910	GCA_015207755.1	Nodularia sp. LEGE 06071	2777965	FALSE	TRUE	FALSE	TRUE
911	GCA_002698425.1	Ahrensia sp.	1872419	FALSE	TRUE	FALSE	TRUE
912	GCA_011492965.1	Rubrobacter marinus	2653852	TRUE	TRUE	FALSE	FALSE
913	GCA_002691605.1	Crocinitomicaceae bacterium	2026728	TRUE	TRUE	FALSE	FALSE
914	GCA_001028085.1	Geobacillus sp. 12AMOR1	1629723	TRUE	TRUE	FALSE	FALSE
915	GCA_000341985.1	Acinetobacter baumannii	1278070	FALSE	TRUE	FALSE	TRUE
916	GCA_002714865.1	Xanthomarina sp.	1931211	TRUE	TRUE	FALSE	FALSE
917	GCA_002709305.1	Crocinitomicaceae bacterium	2026728	TRUE	TRUE	FALSE	FALSE
918	GCA_900115165.1	Roseovarius lutimaris	1005928	FALSE	TRUE	FALSE	TRUE
919	GCA_012641465.1	Vibrio agarilyticus	2726741	TRUE	TRUE	FALSE	FALSE
920	GCA_000156335.1	Roseobacter sp. GAI101	391589	TRUE	TRUE	FALSE	FALSE
921	GCA_002100145.1	Vibrio sp. qd031	1603038	TRUE	TRUE	FALSE	FALSE
922	GCA_014077245.1	Colwellia sp. BRX8-9	2759831	TRUE	TRUE	FALSE	FALSE
923	GCA_001635795.1	Oleiphilus sp. HI0069	1822245	TRUE	TRUE	FALSE	FALSE
924	GCA_002685995.1	Micavibrio sp.	2024841	FALSE	TRUE	TRUE	FALSE
925	GCA_014077305.1	Colwellia sp. BRX8-6	2759834	TRUE	TRUE	FALSE	FALSE
926	GCA_002711135.1	Crocinitomicaceae bacterium	2026728	TRUE	TRUE	FALSE	FALSE
927	GCA_007197735.1	Formosa sediminum	2594004	TRUE	TRUE	FALSE	FALSE
928	GCA_002157205.1	Kushneria marisflavi	157779	FALSE	TRUE	FALSE	TRUE
929	GCA_009363535.1	Microbulbifer sp. THAF38	2587856	FALSE	TRUE	FALSE	TRUE
930	GCA_002697445.1	Rhodothermaceae bacterium	2026787	TRUE	TRUE	FALSE	FALSE
931	GCA_002698965.1	Rhodopirellula sp.	2024855	TRUE	TRUE	FALSE	FALSE
932	GCA_001969365.1	Tateyamaria omphalii	299262	TRUE	TRUE	FALSE	FALSE
933	GCA_002726085.1	Acidobacteria bacterium	1978231	TRUE	TRUE	FALSE	FALSE
934	GCA_001971725.1	Winogradskyella sp. J14-2	1936080	TRUE	TRUE	FALSE	FALSE
935	GCA_002192415.1	Paenibacillus donghaensis	414771	FALSE	TRUE	FALSE	TRUE
936	GCA_004745115.1	Escherichia sp. E4930	2044468	FALSE	TRUE	FALSE	TRUE
937	GCA_002729155.1	Leifsonia sp.	1870902	TRUE	TRUE	FALSE	FALSE
938	GCA_009835145.1	Profundibacterium mesophilum	1037889	FALSE	TRUE	TRUE	FALSE
939	GCA_002699685.1	Flavobacteriaceae bacterium	1871037	TRUE	TRUE	FALSE	FALSE
940	GCA_018491765.1	Novosphingobium profundi	1774954	TRUE	TRUE	FALSE	FALSE
941	GCA_002713305.1	Sulfitobacter sp.	1903071	FALSE	TRUE	FALSE	TRUE
942	GCA_003584965.1	Vibrio sp. PID23_8	1583767	TRUE	TRUE	FALSE	FALSE
943	GCA_002700405.1	Flavobacteriaceae bacterium	1871037	TRUE	TRUE	FALSE	FALSE
944	GCA_002684005.1	Balneola sp.	2024824	TRUE	TRUE	FALSE	FALSE
945	GCA_900176285.1	Desulfacinum hydrothermale	1121390	TRUE	TRUE	FALSE	FALSE
946	GCA_002730485.1	Dehalococcoidia bacterium	2026734	TRUE	TRUE	FALSE	FALSE
947	GCA_009184895.1	Tetrasphaera sp. F2B08	2653936	TRUE	TRUE	FALSE	FALSE
948	GCA_002716025.1	Idiomarina sp.	1874361	TRUE	TRUE	FALSE	FALSE
949	GCA_002875605.1	Vibrio sp. 10N.261.45.A6	1880842	TRUE	TRUE	FALSE	FALSE
950	GCA_002710845.1	Candidatus Marinimicrobia bacterium	2026760	TRUE	TRUE	FALSE	FALSE
951	GCA_002717695.1	Candidatus Marinimicrobia bacterium	2026760	TRUE	TRUE	FALSE	FALSE
952	GCA_015143645.1	Paenibacillus sp. P13VS	2697367	FALSE	TRUE	FALSE	TRUE
953	GCA_000314975.1	Aliiglaciecola lipolytica	1127673	TRUE	TRUE	FALSE	FALSE
954	GCA_002725655.1	Opitutales bacterium	2026772	TRUE	TRUE	FALSE	FALSE
955	GCA_001303495.1	Gammaproteobacteria bacterium SG8_47	1703406	TRUE	TRUE	FALSE	FALSE
956	GCA_002742285.1	Amylibacter kogurei	1889778	FALSE	TRUE	FALSE	TRUE
957	GCA_015207935.1	Synechocystis salina	1828742	TRUE	TRUE	FALSE	FALSE
958	GCA_002685255.1	Idiomarinaceae bacterium	1898113	TRUE	TRUE	FALSE	FALSE
959	GCA_007785775.2	Muricauda hadalis	2597517	TRUE	TRUE	FALSE	FALSE
960	GCA_002716005.1	Leeuwenhoekiella sp.	1977054	TRUE	TRUE	FALSE	FALSE
961	GCA_002696185.1	Alcanivorax sp.	1872427	TRUE	TRUE	FALSE	FALSE
962	GCA_002875885.1	Vibrio sp. 10N.261.46.E8	1880845	TRUE	TRUE	FALSE	FALSE
963	GCA_000775725.1	Vibrio sinaloensis	379097	TRUE	TRUE	FALSE	FALSE
964	GCA_002697745.1	Nitratireductor sp.	1872084	FALSE	TRUE	FALSE	TRUE
965	GCA_002698985.1	Saprospirales bacterium	2026790	FALSE	TRUE	FALSE	TRUE
966	GCA_003355455.1	Erythrobacter aureus	2182384	TRUE	TRUE	FALSE	FALSE
967	GCA_014164455.1	Pseudoalteromonas sp. SG41-6	2760974	TRUE	TRUE	FALSE	FALSE
968	GCA_000185805.1	Thermovibrio ammonificans	648996	TRUE	TRUE	FALSE	FALSE
969	GCA_014077345.1	Colwellia sp. BRX8-4	2759836	TRUE	TRUE	FALSE	FALSE
970	GCA_002695645.1	Opitutae bacterium	2026771	TRUE	TRUE	FALSE	FALSE
971	GCA_002714575.1	Flavobacterium sp.	239	TRUE	TRUE	FALSE	FALSE
972	GCA_001304155.1	candidate division Zixibacteria bacterium SM23_73_3	1703427	TRUE	TRUE	FALSE	FALSE
973	GCA_002695655.1	Verrucomicrobiales bacterium	2026801	TRUE	TRUE	FALSE	FALSE
974	GCA_000816475.1	Vibrio sinaloensis	379097	TRUE	TRUE	FALSE	FALSE
975	GCA_001303225.1	candidate division TA06 bacterium DG_78	1703772	TRUE	TRUE	FALSE	FALSE
976	GCA_002686675.1	Candidatus Marinimicrobia bacterium	2026760	TRUE	TRUE	FALSE	FALSE
977	GCA_003626645.1	Streptomyces klenkii	1420899	FALSE	TRUE	FALSE	TRUE
978	GCA_002704905.1	Candidatus Marinimicrobia bacterium	2026760	TRUE	TRUE	FALSE	FALSE
979	GCA_000737595.1	Synechococcus sp. KORDI-52	585425	TRUE	TRUE	FALSE	FALSE
980	GCA_001634975.1	Oleiphilus sp. HI0072	1822247	TRUE	TRUE	FALSE	FALSE
981	GCA_014164385.1	Pseudoalteromonas sp. SG43-3	2760970	TRUE	TRUE	FALSE	FALSE
982	GCA_014164075.1	Pseudoalteromonas sp. SG45-3	2760955	TRUE	TRUE	FALSE	FALSE
983	GCA_002714225.1	Acidimicrobiaceae bacterium	2024894	TRUE	TRUE	FALSE	FALSE
984	GCA_002877735.1	Vibrio sp. 10N.261.54.E10	1884475	TRUE	TRUE	FALSE	FALSE
985	GCA_001886455.1	Alteromonas mediterranea	314275	TRUE	TRUE	FALSE	FALSE
986	GCA_007993065.1	Paracoccus aurantiacus	2599412	TRUE	TRUE	FALSE	FALSE
987	GCA_900188275.1	Dokdonia pacifica	1627892	FALSE	TRUE	TRUE	FALSE
988	GCA_002686835.1	Opitutae bacterium	2026771	TRUE	TRUE	FALSE	FALSE
989	GCA_002714365.1	Thalassospira sp.	1912094	FALSE	TRUE	FALSE	TRUE
990	GCA_000195335.1	Marinithermus hydrothermalis	869210	TRUE	TRUE	FALSE	FALSE
991	GCA_002877015.1	Enterovibrio norvegicus	188144	TRUE	TRUE	FALSE	FALSE
992	GCA_003605645.1	Vibrio sinensis	2302434	TRUE	TRUE	FALSE	FALSE
993	GCA_002684655.1	Planctomycetota bacterium	2026780	TRUE	TRUE	FALSE	FALSE
994	GCA_002715025.1	Flammeovirgaceae bacterium	2026740	TRUE	TRUE	FALSE	FALSE
995	GCA_002874435.1	Vibrio lentus	136468	TRUE	TRUE	FALSE	FALSE
996	GCA_002711205.1	Bdellovibrionaceae bacterium	2026715	TRUE	TRUE	FALSE	FALSE
997	GCA_002716245.1	Alcanivorax sp.	1872427	TRUE	TRUE	FALSE	FALSE
998	GCA_002715685.1	Alcanivorax sp.	1872427	TRUE	TRUE	FALSE	FALSE
999	GCA_004127935.1	Fictibacillus sp. S7	2212476	TRUE	TRUE	FALSE	FALSE
1000	GCA_003570715.1	Gemmobacter lutimaris	2306023	FALSE	TRUE	FALSE	TRUE
1001	GCA_002703065.1	Flavobacteriaceae bacterium	1871037	TRUE	TRUE	FALSE	FALSE
1002	GCA_002725875.1	Deltaproteobacteria bacterium	2026735	TRUE	TRUE	FALSE	FALSE
1003	GCA_002705565.1	Geminicoccus sp.	2024832	TRUE	TRUE	FALSE	FALSE
1004	GCA_002737025.1	Vibrio splendidus	29497	TRUE	TRUE	FALSE	FALSE
1005	GCA_009903685.1	Muricauda ochracea	2696472	TRUE	TRUE	FALSE	FALSE
1006	GCA_002716625.1	Phycisphaeraceae bacterium	2026777	TRUE	TRUE	FALSE	FALSE
1007	GCA_002683025.1	Alcanivorax sp.	1872427	TRUE	TRUE	FALSE	FALSE
1008	GCA_002721975.1	Epsilonproteobacteria bacterium	2026809	TRUE	TRUE	FALSE	FALSE
1009	GCA_900107645.1	Desulfuromusa kysingii	37625	TRUE	TRUE	FALSE	FALSE
1010	GCA_900156525.1	Pontibaca methylaminivorans	515897	FALSE	TRUE	FALSE	TRUE
1011	GCA_900130015.1	Desulfofustis glycolicus	1121409	TRUE	TRUE	FALSE	FALSE
1012	GCA_014076905.1	Colwellia sp. MB02u-7	2759814	TRUE	TRUE	FALSE	FALSE
1013	GCA_013423925.1	Pseudoalteromonas sp. JSTW	2752475	TRUE	TRUE	FALSE	FALSE
1014	GCA_002731055.1	Candidatus Marinimicrobia bacterium	2026760	TRUE	TRUE	FALSE	FALSE
1015	GCA_000808615.1	Photobacterium gaetbulicola	658445	TRUE	TRUE	FALSE	FALSE
1016	GCA_012272835.1	Spongiibacter thalassae	2721624	TRUE	TRUE	FALSE	FALSE
1017	GCA_015355815.1	Nonlabens mediterrranea	1419947	TRUE	TRUE	FALSE	FALSE
1018	GCA_002730115.1	Gemmatimonadetes bacterium	2026742	TRUE	TRUE	FALSE	FALSE
1019	GCA_014163745.1	Pseudoalteromonas sp. SR44-2	2760937	TRUE	TRUE	FALSE	FALSE
1020	GCA_900106635.1	Tritonibacter mobilis	379347	TRUE	TRUE	FALSE	FALSE
1021	GCA_001579905.1	Labrenzia sp. CP4	1674922	FALSE	TRUE	FALSE	TRUE
1022	GCA_000737575.1	Synechococcus sp. KORDI-49	585423	TRUE	TRUE	FALSE	FALSE
1023	GCA_012395255.1	Oleiagrimonas citrea	1665687	FALSE	TRUE	FALSE	TRUE
1024	GCA_900100795.1	Pseudomonas abietaniphila	89065	FALSE	TRUE	FALSE	TRUE
1025	GCA_900141955.1	Aequorivita viscosa	797419	TRUE	TRUE	FALSE	FALSE
1026	GCA_002693405.1	Paracoccus sp.	267	TRUE	TRUE	FALSE	FALSE
1027	GCA_003258595.1	Acuticoccus sediminis	2184697	TRUE	TRUE	FALSE	FALSE
1028	GCA_002382885.1	Streptomyces sp. WZ.A104	2023771	FALSE	TRUE	FALSE	TRUE
1029	GCA_002726345.1	Idiomarina sp.	1874361	TRUE	TRUE	FALSE	FALSE
1030	GCA_002713645.1	Flavobacteriaceae bacterium	1871037	TRUE	TRUE	FALSE	FALSE
1031	GCA_002631205.1	Lewinella marina	438751	TRUE	TRUE	FALSE	FALSE
1032	GCA_003231495.1	Acaryochloris thomasi	1764569	FALSE	TRUE	FALSE	TRUE
1033	GCA_003987315.1	Aliidiomarina haloalkalitolerans	859059	TRUE	TRUE	FALSE	FALSE
1034	GCA_006546625.1	Haloflavibacter putidus	2576776	TRUE	TRUE	FALSE	FALSE
1035	GCA_002875525.1	Vibrio sp. 10N.222.55.C12	1884470	TRUE	TRUE	FALSE	FALSE
1036	GCA_002873035.1	Enterovibrio norvegicus	188144	TRUE	TRUE	FALSE	FALSE
1037	GCA_002701785.1	Candidatus Marinimicrobia bacterium	2026760	TRUE	TRUE	FALSE	FALSE
1038	GCA_014163675.1	Pseudoalteromonas sp. SR44-5	2760934	TRUE	TRUE	FALSE	FALSE
1039	GCA_002879675.3	Streptomyces sp. SMS_SU21	2069440	FALSE	TRUE	FALSE	TRUE
1040	GCA_002693845.1	Alcanivorax sp.	1872427	TRUE	TRUE	FALSE	FALSE
1041	GCA_002875545.1	Enterovibrio norvegicus	188144	TRUE	TRUE	FALSE	FALSE
1042	GCA_002694065.1	Acidiferrobacter sp.	1872107	TRUE	TRUE	FALSE	FALSE
1043	GCA_009363695.1	Bacillus sp. THAF10	2587848	TRUE	TRUE	FALSE	FALSE
1044	GCA_002699605.1	Muricauda sp.	192149	TRUE	TRUE	FALSE	FALSE
1045	GCA_002710745.1	Porticoccaceae bacterium	2026782	TRUE	TRUE	FALSE	FALSE
1046	GCA_006517275.1	Labrenzia sp. PHM005	2590016	FALSE	TRUE	FALSE	TRUE
1047	GCA_002691215.1	Ponticaulis sp.	2020902	TRUE	TRUE	FALSE	FALSE
1048	GCA_001635365.1	Oleiphilus sp. HI0128	1822267	TRUE	TRUE	FALSE	FALSE
1049	GCA_001635315.1	Oleiphilus sp. HI0123	1822265	TRUE	TRUE	FALSE	FALSE
1050	GCA_002692205.1	Legionellales bacterium	2026754	TRUE	TRUE	FALSE	FALSE
1051	GCA_002685395.1	Rheinheimera sp.	1869214	TRUE	TRUE	FALSE	FALSE
1052	GCA_000808535.1	Vibrio sinaloensis	379097	TRUE	TRUE	FALSE	FALSE
1053	GCA_001634945.1	Alcanivorax sp. HI0044	1822234	TRUE	TRUE	FALSE	FALSE
1054	GCA_002719955.1	Deltaproteobacteria bacterium	2026735	TRUE	TRUE	FALSE	FALSE
1055	GCA_013177675.1	Arcobacter acticola	1849015	TRUE	TRUE	FALSE	FALSE
1056	GCA_000836695.1	Wenxinia marina	1123501	FALSE	TRUE	FALSE	TRUE
1057	GCA_002728225.1	Verrucomicrobiales bacterium	2026801	TRUE	TRUE	FALSE	FALSE
1058	GCA_014077325.1	Colwellia sp. BRX8-5	2759835	TRUE	TRUE	FALSE	FALSE
1059	GCA_014077545.1	Colwellia sp. BRX10-1	2759846	TRUE	TRUE	FALSE	FALSE
1060	GCA_001304315.1	candidate division Zixibacteria bacterium SM23_73_2	1703426	TRUE	TRUE	FALSE	FALSE
1061	GCA_007860045.1	Stieleria varia	2528005	FALSE	TRUE	FALSE	TRUE
1062	GCA_002693765.1	Alteromonas sp.	232	TRUE	TRUE	FALSE	FALSE
1063	GCA_007859715.1	Rubinisphaera italica	2527969	TRUE	TRUE	FALSE	FALSE
1064	GCA_002689445.1	Gammaproteobacteria bacterium	1913989	TRUE	TRUE	FALSE	FALSE
1065	GCA_004310335.1	Hyunsoonleella pacifica	1080224	TRUE	TRUE	FALSE	FALSE
1066	GCA_003026365.1	Photobacterium angustum	661	TRUE	TRUE	FALSE	FALSE
1067	GCA_014077415.1	Colwellia sp. BRX10-7	2759840	TRUE	TRUE	FALSE	FALSE
1068	GCA_002874055.1	Vibrio sp. 10N.286.55.C11	1884478	TRUE	TRUE	FALSE	FALSE
1069	GCA_002591625.1	Porticoccaceae bacterium	2026782	TRUE	TRUE	FALSE	FALSE
1070	GCA_002706925.1	Hyphomicrobiales bacterium	1909294	TRUE	TRUE	FALSE	FALSE
1071	GCA_002683675.1	Rheinheimera sp.	1869214	TRUE	TRUE	FALSE	FALSE
1072	GCA_002712945.1	Citromicrobium sp.	2024827	TRUE	TRUE	FALSE	FALSE
1073	GCA_000327045.1	Thioflavicoccus mobilis	765912	TRUE	TRUE	FALSE	FALSE
1074	GCA_900090265.1	Micromonospora rifamycinica	291594	FALSE	TRUE	FALSE	TRUE
1075	GCA_002729175.1	Candidatus Marinimicrobia bacterium	2026760	TRUE	TRUE	FALSE	FALSE
1076	GCA_014163835.1	Pseudoalteromonas sp. SR43-5	2760941	TRUE	TRUE	FALSE	FALSE
1077	GCA_001632065.1	Prochlorococcus marinus	1801624	TRUE	TRUE	FALSE	FALSE
1078	GCA_002724925.1	Oceanospirillaceae bacterium	1899355	TRUE	TRUE	FALSE	FALSE
1079	GCA_002726915.1	Verrucomicrobiales bacterium	2026801	TRUE	TRUE	FALSE	FALSE
1080	GCA_002726575.1	Porticoccaceae bacterium	2026782	TRUE	TRUE	FALSE	FALSE
1081	GCA_002729435.1	Oceanospirillaceae bacterium	1899355	TRUE	TRUE	FALSE	FALSE
1082	GCA_003970385.1	Vibrio aquaticus	2496559	TRUE	TRUE	FALSE	FALSE
1083	GCA_013385175.1	Allochromatium humboldtianum	504901	TRUE	TRUE	FALSE	FALSE
1084	GCA_000415045.1	Enterococcus faecalis	1260363	TRUE	TRUE	FALSE	FALSE
1085	GCA_000209655.1	Pusillimonas sp. T7-7	1007105	FALSE	TRUE	FALSE	TRUE
1086	GCA_002706205.1	Halobacteriovoraceae bacterium	2026745	FALSE	TRUE	FALSE	TRUE
1087	GCA_008086325.1	Acinetobacter nosocomialis	106654	FALSE	TRUE	FALSE	TRUE
1088	GCA_002701185.1	Candidatus Marinimicrobia bacterium	2026760	TRUE	TRUE	FALSE	FALSE
1089	GCA_000299895.1	Idiomarina xiamenensis	740709	FALSE	TRUE	FALSE	TRUE
1090	GCA_004211985.1	Escherichia sp. E10V10	2478970	FALSE	TRUE	FALSE	TRUE
1091	GCA_001303085.1	Gemmatimonas sp. SG8_23	1703356	TRUE	TRUE	FALSE	FALSE
1092	GCA_002702785.1	Leifsonia sp.	1870902	TRUE	TRUE	FALSE	FALSE
1093	GCA_002701765.1	Porticoccaceae bacterium	2026782	TRUE	TRUE	FALSE	FALSE
1094	GCA_000024825.1	Vibrio antiquarius	150340	TRUE	TRUE	FALSE	FALSE
1095	GCA_002709915.1	Roseibacillus sp.	2024856	TRUE	TRUE	FALSE	FALSE
1096	GCA_002695985.1	Roseovarius sp.	1486281	FALSE	TRUE	FALSE	TRUE
1097	GCA_002689925.1	Candidatus Pelagibacter sp.	2024849	TRUE	TRUE	FALSE	FALSE
1098	GCA_014077005.1	Colwellia sp. MB3u-45	2759820	TRUE	TRUE	FALSE	FALSE
1099	GCA_900129395.1	Pseudosulfitobacter pseudonitzschiae	1402135	FALSE	TRUE	FALSE	TRUE
1100	GCA_001635055.1	Sulfitobacter sp. HI0076	1822251	FALSE	TRUE	FALSE	TRUE
1101	GCA_002720595.1	Woeseia sp.	1980636	TRUE	TRUE	FALSE	FALSE
1102	GCA_002874415.1	Vibrio sp. 10N.286.49.C2	1880856	TRUE	TRUE	FALSE	FALSE
1103	GCA_010092445.1	Shewanella sp. Arc9-LZ	2698686	TRUE	TRUE	FALSE	FALSE
1104	GCA_002696005.1	Idiomarina sp.	1874361	TRUE	TRUE	FALSE	FALSE
1105	GCA_000214665.1	Methylomonas methanica	857087	TRUE	TRUE	FALSE	FALSE
1106	GCA_000338295.1	Rhodopirellula europaea	1263867	FALSE	TRUE	FALSE	TRUE
1107	GCA_002727785.1	Dehalococcoidia bacterium	2026734	TRUE	TRUE	FALSE	FALSE
1108	GCA_002709465.1	Alcanivorax sp.	1872427	TRUE	TRUE	FALSE	FALSE
1109	GCA_002715605.1	Pseudozobellia sp.	2024854	TRUE	TRUE	FALSE	FALSE
1110	GCA_900116625.1	Idiomarina abyssalis	86102	TRUE	TRUE	FALSE	FALSE
1111	GCA_900142205.1	Reichenbachiella agariperforans	156994	FALSE	TRUE	TRUE	FALSE
1112	GCA_002729515.1	Deltaproteobacteria bacterium	2026735	TRUE	TRUE	FALSE	FALSE
1113	GCA_002715485.1	Aequorivita sp.	1872390	TRUE	TRUE	FALSE	FALSE
1114	GCA_001304185.1	candidate division TA06 bacterium SM1_40	1703773	TRUE	TRUE	FALSE	FALSE
1115	GCA_002715795.1	Cryomorphaceae bacterium	1898111	TRUE	TRUE	FALSE	FALSE
1116	GCA_002726245.1	Planctomycetaceae bacterium	2026779	FALSE	TRUE	TRUE	FALSE
1117	GCA_002713445.1	bacterium	1869227	TRUE	TRUE	FALSE	FALSE
1118	GCA_002697085.1	Aequorivita sp.	1872390	TRUE	TRUE	FALSE	FALSE
1119	GCA_002683145.1	Myxococcales bacterium	2026763	TRUE	TRUE	FALSE	FALSE
1120	GCA_002722435.1	Legionellales bacterium	2026754	TRUE	TRUE	FALSE	FALSE
1121	GCA_003626535.1	Streptomyces hoynatensis	1141874	FALSE	TRUE	FALSE	TRUE
1122	GCA_001690915.1	Aliivibrio fischeri	668	TRUE	TRUE	FALSE	FALSE
1123	GCA_001303265.1	Gemmatimonas sp. SG8_17	1703355	TRUE	TRUE	FALSE	FALSE
1124	GCA_002080415.1	Roseovarius mucosus	215743	FALSE	TRUE	FALSE	TRUE
1125	GCA_007748115.1	Bremerella volcania	2527984	TRUE	TRUE	FALSE	FALSE
1126	GCA_002877155.1	Vibrio sp. 10N.261.52.E5	1884473	TRUE	TRUE	FALSE	FALSE
1127	GCA_004104055.1	unclassified	283735	TRUE	TRUE	FALSE	FALSE
1128	GCA_002715965.1	Verrucomicrobiales bacterium	2026801	TRUE	TRUE	FALSE	FALSE
1129	GCA_002087085.1	Marispirochaeta aestuarii	1963862	TRUE	TRUE	FALSE	FALSE
1130	GCA_001305615.1	Actibacterium sp. EMB200-NS6	1609966	TRUE	TRUE	FALSE	FALSE
1131	GCA_003176715.1	Micromonospora sp. S4605	1420897	FALSE	TRUE	FALSE	TRUE
1132	GCA_003688895.1	Dokdonia sinensis	2479847	TRUE	TRUE	FALSE	FALSE
1133	GCA_002695285.1	Candidatus Marinimicrobia bacterium	2026760	TRUE	TRUE	FALSE	FALSE
1134	GCA_002726835.1	Haliea sp.	1932666	TRUE	TRUE	FALSE	FALSE
1135	GCA_900100855.1	Idiomarina zobellii	86103	TRUE	TRUE	FALSE	FALSE
1136	GCA_002723275.1	Planctomycetaceae bacterium	2026779	FALSE	TRUE	FALSE	TRUE
1137	GCA_002683215.1	Planctomycetaceae bacterium	2026779	TRUE	TRUE	FALSE	FALSE
1138	GCA_900091425.1	Micromonospora krabiensis	307121	FALSE	TRUE	FALSE	TRUE
1139	GCA_000186245.1	Nitratifractor salsuginis	749222	TRUE	TRUE	FALSE	FALSE
1140	GCA_002713495.1	Flavobacteriaceae bacterium	1871037	TRUE	TRUE	FALSE	FALSE
1141	GCA_002697505.1	Flavobacteriales bacterium	2021391	TRUE	TRUE	FALSE	FALSE
1142	GCA_001458255.1	Thalassobius autumnalis	2072972	FALSE	TRUE	FALSE	TRUE
1143	GCA_002709595.1	Hyphomonas sp.	87	TRUE	TRUE	FALSE	FALSE
1144	GCA_012933605.1	unclassified	1218	TRUE	TRUE	FALSE	FALSE
1145	GCA_002684755.1	Phycisphaerae bacterium	2026778	TRUE	TRUE	FALSE	FALSE
1146	GCA_000176715.1	Vibrio sp. RC586	675815	TRUE	TRUE	FALSE	FALSE
1147	GCA_003858655.1	Amphritea balenae	1278310	TRUE	TRUE	FALSE	FALSE
1148	GCA_009709595.1	Microbacterium sp. ZXX196	2609291	TRUE	TRUE	FALSE	FALSE
1149	GCA_002714715.1	Confluentimicrobium sp.	1931204	FALSE	TRUE	FALSE	TRUE
1150	GCA_002722545.1	Opitutae bacterium	2026771	TRUE	TRUE	FALSE	FALSE
1151	GCA_002696165.1	Phycisphaerae bacterium	2026778	FALSE	TRUE	FALSE	TRUE
1152	GCA_002591605.1	Candidatus Marinimicrobia bacterium	2026760	TRUE	TRUE	FALSE	FALSE
1153	GCA_001458235.1	Cognatishimia activa	1715691	FALSE	TRUE	TRUE	FALSE
1154	GCA_005144745.1	Flavobacterium sp. ASW18X	2572595	TRUE	TRUE	FALSE	FALSE
1155	GCA_002690025.1	Sutterellaceae bacterium	2026794	TRUE	TRUE	FALSE	FALSE
1156	GCA_013141825.1	Marinifilum caeruleilacunae	2499076	TRUE	TRUE	FALSE	FALSE
1157	GCA_002720455.1	Planctomycetota bacterium	2026780	TRUE	TRUE	FALSE	FALSE
1158	GCA_002723155.1	Ponticaulis sp.	2020902	TRUE	TRUE	FALSE	FALSE
1159	GCA_900102315.1	Celeribacter baekdonensis	875171	TRUE	TRUE	FALSE	FALSE
1160	GCA_014077515.1	Colwellia sp. BRX10-2	2759845	TRUE	TRUE	FALSE	FALSE
1161	GCA_001998865.1	Tessaracoccus flavescens	399497	TRUE	TRUE	FALSE	FALSE
1162	GCA_009363775.1	Pseudoalteromonas sp. THAF3	2587843	TRUE	TRUE	FALSE	FALSE
1163	GCA_016722945.1	Desulfofustis sp. PB-SRB1	1385624	TRUE	TRUE	FALSE	FALSE
1164	GCA_002687855.1	Halobacteriovoraceae bacterium	2026745	FALSE	TRUE	FALSE	TRUE
1165	GCA_001294745.1	Idiomarina zobellii	86103	TRUE	TRUE	FALSE	FALSE
1166	GCA_002691125.1	Alteromonas sp.	232	TRUE	TRUE	FALSE	FALSE
1167	GCA_002684095.1	Haliea sp.	1932666	TRUE	TRUE	FALSE	FALSE
1168	GCA_014164175.1	Pseudoalteromonas sp. SG44-5	2760960	TRUE	TRUE	FALSE	FALSE
1169	GCA_014077275.1	Colwellia sp. BRX8-7	2759833	TRUE	TRUE	FALSE	FALSE
1170	GCA_014077185.1	Colwellia sp. MB02u-10	2759828	TRUE	TRUE	FALSE	FALSE
1171	GCA_002717425.1	Deltaproteobacteria bacterium	2026735	TRUE	TRUE	FALSE	FALSE
1172	GCA_000829715.2	Streptomyces lydicamycinicus	1546107	FALSE	TRUE	FALSE	TRUE
1173	GCA_002715905.1	Crocinitomicaceae bacterium	2026728	TRUE	TRUE	FALSE	FALSE
1174	GCA_000808555.1	Vibrio sinaloensis	379097	TRUE	TRUE	FALSE	FALSE
1175	GCA_014163545.1	Pseudoalteromonas sp. SR45-6	2760927	TRUE	TRUE	FALSE	FALSE
1176	GCA_012038135.1	Salinimicrobium nanhaiense	2722701	TRUE	TRUE	FALSE	FALSE
1177	GCA_002724185.1	Acidiferrobacteraceae bacterium	2024893	TRUE	TRUE	FALSE	FALSE
1178	GCA_002696345.1	Myxococcales bacterium	2026763	TRUE	TRUE	FALSE	FALSE
1179	GCA_001303965.1	Anaerolineae bacterium SM23_ 63	1703387	TRUE	TRUE	FALSE	FALSE
1180	GCA_002684495.1	Gammaproteobacteria bacterium	1913989	TRUE	TRUE	FALSE	FALSE
1181	GCA_002706495.1	Roseovarius sp.	1486281	FALSE	TRUE	FALSE	TRUE
1182	GCA_000183425.1	Marivirga tractuosa	643867	TRUE	TRUE	FALSE	FALSE
1183	GCA_900143695.1	Desulfopila aestuarii	1121416	TRUE	TRUE	FALSE	FALSE
1184	GCA_002701165.1	Candidatus Marinimicrobia bacterium	2026760	TRUE	TRUE	FALSE	FALSE
1185	GCA_002716225.1	Croceibacter sp.	2024829	TRUE	TRUE	FALSE	FALSE
1186	GCA_002708985.1	Saprospirales bacterium	2026790	TRUE	TRUE	FALSE	FALSE
1187	GCA_002687025.1	Candidatus Poribacteria bacterium	2026781	TRUE	TRUE	FALSE	FALSE
1188	GCA_000734975.2	Halomonas sp. KO116	1504981	FALSE	TRUE	FALSE	TRUE
1189	GCA_002731275.1	Deltaproteobacteria bacterium	2026735	TRUE	TRUE	FALSE	FALSE
1190	GCA_002727295.1	Anaerolineaceae bacterium	2024896	TRUE	TRUE	FALSE	FALSE
1191	GCA_002116735.1	Marinobacter salarius	1420917	FALSE	TRUE	FALSE	TRUE
1192	GCA_002730615.1	Alcanivorax sp.	1872427	TRUE	TRUE	FALSE	FALSE
1193	GCA_014163815.1	Pseudoalteromonas sp. SR43-6	2760940	TRUE	TRUE	FALSE	FALSE
1194	GCA_002715985.1	Xanthomonadales bacterium	2006849	TRUE	TRUE	FALSE	FALSE
1195	GCA_003987045.1	Pseudidiomarina marina	502366	TRUE	TRUE	FALSE	FALSE
1196	GCA_002705005.1	Sphingomonas sp.	28214	TRUE	TRUE	FALSE	FALSE
1197	GCA_003260125.1	Lujinxingia litoralis	2211119	TRUE	TRUE	FALSE	FALSE
1198	GCA_000204155.1	Micromonospora maris	263358	FALSE	TRUE	FALSE	TRUE
1199	GCA_000760335.1	Prochlorococcus sp. MIT 0703	1499504	TRUE	TRUE	FALSE	FALSE
1200	GCA_014077155.1	Colwellia sp. MB02u-12	2759827	TRUE	TRUE	FALSE	FALSE
1201	GCA_008370495.1	Pseudohalioglobus sediminis	2606449	TRUE	TRUE	FALSE	FALSE
1202	GCA_003172895.1	Leucothrix arctica	1481894	TRUE	TRUE	FALSE	FALSE
1203	GCA_002684995.1	Oceanospirillum sp.	2021254	FALSE	TRUE	FALSE	TRUE
1204	GCA_001685415.1	Serinicoccus hydrothermalis	1758689	TRUE	TRUE	FALSE	FALSE
1205	GCA_002698065.1	Alteromonadaceae bacterium	1916082	TRUE	TRUE	FALSE	FALSE
1206	GCA_002702515.1	Verrucomicrobiales bacterium	2026801	TRUE	TRUE	FALSE	FALSE
1207	GCA_014163785.1	Pseudoalteromonas sp. SR43-7	2760939	TRUE	TRUE	FALSE	FALSE
1208	GCA_002703565.1	Formosa sp.	2018467	TRUE	TRUE	FALSE	FALSE
1209	GCA_002685055.1	Oceanospirillaceae bacterium	1899355	TRUE	TRUE	FALSE	FALSE
1210	GCA_004295345.1	Shewanella maritima	2520507	TRUE	TRUE	FALSE	FALSE
1211	GCA_002685555.1	Alcanivorax sp.	1872427	TRUE	TRUE	FALSE	FALSE
1212	GCA_014164215.1	Shewanella sp. SG44-2	2760962	TRUE	TRUE	FALSE	FALSE
1213	GCA_002725435.1	Gemmatimonadetes bacterium	2026742	TRUE	TRUE	FALSE	FALSE
1214	GCA_002729535.1	Oceanospirillaceae bacterium	1899355	TRUE	TRUE	FALSE	FALSE
1215	GCA_012911815.1	Alteromonas ponticola	2720613	TRUE	TRUE	FALSE	FALSE
1216	GCA_002691835.1	Planctomycetota bacterium	2026780	TRUE	TRUE	FALSE	FALSE
1217	GCA_002716205.1	Hyphomonas sp.	87	TRUE	TRUE	FALSE	FALSE
1218	GCA_002875555.1	Vibrio sp. 10N.261.45.A1	1880841	TRUE	TRUE	FALSE	FALSE
1219	GCA_002732075.1	Nevskiales bacterium	2026766	TRUE	TRUE	FALSE	FALSE
1220	GCA_002685655.1	Planctomycetaceae bacterium	2026779	FALSE	TRUE	FALSE	TRUE
1221	GCA_014164365.1	Pseudoalteromonas sp. SG43-6	2760967	TRUE	TRUE	FALSE	FALSE
1222	GCA_001691015.1	Aliivibrio fischeri	668	TRUE	TRUE	FALSE	FALSE
1223	GCA_003047105.1	Celeribacter baekdonensis	875171	TRUE	TRUE	FALSE	FALSE
1224	GCA_004211995.1	Escherichia sp. E14S1	2478968	FALSE	TRUE	FALSE	TRUE
1225	GCA_000025905.1	Coraliomargarita akajimensis	583355	TRUE	TRUE	FALSE	FALSE
1226	GCA_002163855.1	Winogradskyella sp. PC-19	754417	TRUE	TRUE	FALSE	FALSE
1227	GCA_001856665.1	Rhodobacter sp. LPB0142	1850250	TRUE	TRUE	FALSE	FALSE
1228	GCA_009363595.1	Labrenzia sp. THAF35	2587854	FALSE	TRUE	FALSE	TRUE
1229	GCA_002730525.1	Acidobacteria bacterium	1978231	TRUE	TRUE	FALSE	FALSE
1230	GCA_002722805.1	Hyphomonas sp.	87	TRUE	TRUE	FALSE	FALSE
1231	GCA_002714665.1	Balneola sp.	2024824	TRUE	TRUE	FALSE	FALSE
1232	GCA_011806445.1	Pseudoalteromonas sp. HF66	2721559	TRUE	TRUE	FALSE	FALSE
1233	GCA_002696805.1	Candidatus Marinimicrobia bacterium	2026760	TRUE	TRUE	FALSE	FALSE
1234	GCA_002722675.1	Opitutaceae bacterium	2006848	TRUE	TRUE	FALSE	FALSE
1235	GCA_004358185.1	Antarcticimicrobium luteum	2547397	TRUE	TRUE	FALSE	FALSE
1236	GCA_009617595.1	Tritonibacter aquimaris	2663379	TRUE	TRUE	FALSE	FALSE
1237	GCA_002722255.1	Winogradskyella sp.	1883156	TRUE	TRUE	FALSE	FALSE
1238	GCA_002703365.1	Verrucomicrobiales bacterium	2026801	TRUE	TRUE	FALSE	FALSE
1239	GCA_000300995.1	Alcanivorax hongdengensis	1177179	TRUE	TRUE	FALSE	FALSE
1240	GCA_002725575.1	Verrucomicrobiales bacterium	2026801	TRUE	FALSE	FALSE	TRUE
1241	GCA_002714465.1	Gemmatimonadetes bacterium	2026742	TRUE	TRUE	FALSE	FALSE
1242	GCA_002716385.1	Phycisphaerae bacterium	2026778	TRUE	TRUE	FALSE	FALSE
1243	GCA_002727935.1	Dehalococcoidaceae bacterium	2026731	TRUE	TRUE	FALSE	FALSE
1244	GCA_011492945.1	Rubrobacter tropicus	2653851	TRUE	TRUE	FALSE	FALSE
1245	GCA_002698385.1	Hyphomicrobiales bacterium	1909294	TRUE	TRUE	FALSE	FALSE
1246	GCA_002717145.1	Planctomycetaceae bacterium	2026779	TRUE	TRUE	FALSE	FALSE
1247	GCA_003258835.1	Rhodobium orientis	34017	FALSE	TRUE	FALSE	TRUE
1248	GCA_000757865.1	Prochlorococcus sp. MIT 0801	1501269	TRUE	TRUE	FALSE	FALSE
1249	GCA_002686995.1	Phycisphaeraceae bacterium	2026777	FALSE	TRUE	FALSE	TRUE
1250	GCA_002684315.1	Planctomycetaceae bacterium	2026779	TRUE	TRUE	FALSE	FALSE
1251	GCA_002697625.1	Flavobacteriales bacterium	2021391	TRUE	TRUE	FALSE	FALSE
1252	GCA_002686655.1	Crocinitomicaceae bacterium	2026728	TRUE	TRUE	FALSE	FALSE
1253	GCA_002711755.1	Confluentimicrobium sp.	1931204	TRUE	TRUE	FALSE	FALSE
1254	GCA_900177665.1	Marivirga sericea	1028	TRUE	TRUE	FALSE	FALSE
1255	GCA_002872975.1	Enterovibrio norvegicus	188144	TRUE	TRUE	FALSE	FALSE
1256	GCA_004151355.1	Dermacoccus sp. 147Ba	2510111	TRUE	TRUE	FALSE	FALSE
1257	GCA_003063355.1	Limnohabitans sp. Bal53	1977910	TRUE	TRUE	FALSE	FALSE
1258	GCA_002699145.1	Halioglobus sp.	2024834	TRUE	TRUE	FALSE	FALSE
1259	GCA_002687635.1	Ponticaulis sp.	2020902	TRUE	TRUE	FALSE	FALSE
1260	GCA_002685335.1	Planctomycetaceae bacterium	2026779	FALSE	TRUE	FALSE	TRUE
1261	GCA_009363615.1	Ruegeria sp. THAF33	2587853	TRUE	TRUE	FALSE	FALSE
1262	GCA_002717205.1	Chloroflexi bacterium	2026724	TRUE	TRUE	FALSE	FALSE
1263	GCA_015207395.1	Nodosilinea sp. LEGE 07088	2777968	TRUE	TRUE	FALSE	FALSE
1264	GCA_002875145.1	Vibrio tasmaniensis	212663	TRUE	TRUE	FALSE	FALSE
1265	GCA_001886475.1	Alteromonas sp. RW2A1	1917158	TRUE	TRUE	FALSE	FALSE
1266	GCA_002724495.1	Acidimicrobiaceae bacterium	2024894	TRUE	TRUE	FALSE	FALSE
1267	GCA_002731615.1	Crocinitomicaceae bacterium	2026728	TRUE	TRUE	FALSE	FALSE
1268	GCA_014212065.1	Aequorivita sp. 609	2760087	FALSE	TRUE	TRUE	FALSE
1269	GCA_900113345.1	Phaeobacter italicus	481446	TRUE	TRUE	FALSE	FALSE
1270	GCA_000259575.1	gamma proteobacterium BDW918	1168065	TRUE	TRUE	FALSE	FALSE
1271	GCA_002721815.1	Myxococcales bacterium	2026763	TRUE	TRUE	FALSE	FALSE
1272	GCA_001304015.1	candidate division Zixibacteria bacterium SM23_81	1703428	TRUE	TRUE	FALSE	FALSE
1273	GCA_001632145.1	Prochlorococcus marinus	1801627	TRUE	TRUE	FALSE	FALSE
1274	GCA_014062345.1	Tenacibaculum pelagium	2759527	TRUE	TRUE	FALSE	FALSE
1275	GCA_002698605.1	Candidatus Marinimicrobia bacterium	2026760	TRUE	TRUE	FALSE	FALSE
1276	GCA_002685815.1	Dehalococcoidales bacterium	2026733	TRUE	TRUE	FALSE	FALSE
1277	GCA_002723235.1	Spongiibacteraceae bacterium	2026793	TRUE	TRUE	FALSE	FALSE
1278	GCA_000179555.1	Solidesulfovibrio fructosivorans	596151	TRUE	TRUE	FALSE	FALSE
1279	GCA_002696885.1	Verrucomicrobiales bacterium	2026801	TRUE	TRUE	FALSE	FALSE
1280	GCA_002694685.1	Balneola sp.	2024824	TRUE	TRUE	FALSE	FALSE
1281	GCA_014076955.1	Colwellia sp. Bg11-12	2759817	TRUE	TRUE	FALSE	FALSE
1282	GCA_002689995.1	Candidatus Marinimicrobia bacterium	2026760	TRUE	TRUE	FALSE	FALSE
1283	GCA_001676085.1	Photobacterium aquimaris	512643	TRUE	TRUE	FALSE	FALSE
1284	GCA_002683495.1	Aequorivita sp.	1872390	TRUE	TRUE	FALSE	FALSE
1285	GCA_001302765.1	Deltaproteobacteria bacterium DG_8	1703397	TRUE	TRUE	FALSE	FALSE
1286	GCA_003937815.1	Tenacibaculum litoreum	321269	FALSE	TRUE	FALSE	TRUE
1287	GCA_002702685.1	Planctomyces sp.	37635	FALSE	TRUE	TRUE	FALSE
1288	GCA_002695005.1	Maritimibacter sp.	2003363	FALSE	TRUE	FALSE	TRUE
1289	GCA_001561955.1	Anaerotignum propionicum	991789	TRUE	TRUE	FALSE	FALSE
1290	GCA_002699025.1	Sandaracinus sp.	2024858	TRUE	TRUE	FALSE	FALSE
1291	GCA_001889165.1	Bacillus weihaiensis	1547283	TRUE	TRUE	FALSE	FALSE
1292	GCA_004152935.1	Brumimicrobium glaciale	200475	TRUE	TRUE	FALSE	FALSE
1293	GCA_001304335.1	candidate division TA06 bacterium DG_26	1703771	TRUE	TRUE	FALSE	FALSE
1294	GCA_002702745.1	Flavobacteriaceae bacterium	1871037	TRUE	TRUE	FALSE	FALSE
1295	GCA_000195575.1	Carnobacterium sp. 17-4	208596	TRUE	TRUE	FALSE	FALSE
1296	GCA_900108485.1	Rheinheimera pacifica	173990	FALSE	TRUE	FALSE	TRUE
1297	GCA_002699325.1	Ponticaulis sp.	2020902	TRUE	TRUE	FALSE	FALSE
1298	GCA_016864015.1	Lacinutrix sp. WUR7	2653681	TRUE	TRUE	FALSE	FALSE
1299	GCA_001889005.1	Gramella salexigens	1913577	TRUE	TRUE	FALSE	FALSE
1300	GCA_001634775.1	Sulfitobacter sp. HI0027	1822226	FALSE	TRUE	FALSE	TRUE
1301	GCA_002696065.1	Alteromonas sp.	232	TRUE	TRUE	FALSE	FALSE
1302	GCA_001303465.1	Phycisphaerae bacterium SG8_4	1703409	TRUE	TRUE	FALSE	FALSE
1303	GCA_002721285.1	Crocinitomicaceae bacterium	2026728	TRUE	TRUE	FALSE	FALSE
1304	GCA_002691585.1	Legionellales bacterium	2026754	TRUE	TRUE	FALSE	FALSE
1305	GCA_014163935.1	Pseudoalteromonas sp. SR41-7	2760947	TRUE	TRUE	FALSE	FALSE
1306	GCA_009735515.1	Ancylomarina euxinus	2283627	TRUE	TRUE	FALSE	FALSE
1307	GCA_014164415.1	Pseudoalteromonas sp. SG43-1	2760971	TRUE	TRUE	FALSE	FALSE
1308	GCA_000756565.1	Rhodovulum sp. NI22	1469613	TRUE	TRUE	FALSE	FALSE
1309	GCA_001691095.1	Aliivibrio fischeri	668	TRUE	TRUE	FALSE	FALSE
1310	GCA_002876245.1	Vibrio tasmaniensis	212663	TRUE	TRUE	FALSE	FALSE
1311	GCA_014163875.1	Pseudoalteromonas sp. SR43-3	2760943	TRUE	TRUE	FALSE	FALSE
1312	GCA_003545765.1	Colwellia sp. RSH04	2305464	TRUE	TRUE	FALSE	FALSE
1313	GCA_001632125.1	Prochlorococcus marinus	1801626	TRUE	TRUE	FALSE	FALSE
1314	GCA_900089585.1	Micromonospora sediminicola	946078	FALSE	TRUE	FALSE	TRUE
1315	GCA_002730755.1	Dehalococcoidia bacterium	2026734	TRUE	TRUE	FALSE	FALSE
1316	GCA_002706945.1	Nocardioides sp.	35761	TRUE	TRUE	FALSE	FALSE
1317	GCA_002725915.1	Gemmatimonadetes bacterium	2026742	FALSE	TRUE	FALSE	TRUE
1318	GCA_000176235.1	Vibrio orientalis	675816	TRUE	TRUE	FALSE	FALSE
1319	GCA_001969345.1	Phaeobacter inhibens	221822	TRUE	TRUE	FALSE	FALSE
1320	GCA_900156815.1	Gemmobacter megaterium	1086013	TRUE	TRUE	FALSE	FALSE
1321	GCA_001631965.1	Prochlorococcus sp. MIT 1303	1723647	TRUE	TRUE	FALSE	FALSE
1322	GCA_002876675.1	Vibrio sp. 10N.222.54.F10	1884469	TRUE	TRUE	FALSE	FALSE
1323	GCA_009720625.1	Metabacillus sediminilitoris	2567941	TRUE	TRUE	FALSE	FALSE
1324	GCA_900106675.1	Allgaiera indica	765699	FALSE	TRUE	FALSE	TRUE
1325	GCA_001691065.1	Aliivibrio sp. 1S128	1840085	TRUE	TRUE	FALSE	FALSE
1326	GCA_000241815.1	Caldithrix abyssi	880073	FALSE	TRUE	FALSE	TRUE
1327	GCA_900102075.1	Salipiger thiooxidans	282683	FALSE	TRUE	FALSE	TRUE
1328	GCA_011806485.1	Vibrio diazotrophicus	685	TRUE	TRUE	FALSE	FALSE
1329	GCA_014164225.1	Pseudoalteromonas sp. SG44-4	2760961	TRUE	TRUE	FALSE	FALSE
1330	GCA_900142285.1	Caminicella sporogenes	1121266	TRUE	TRUE	FALSE	FALSE
1331	GCA_900156675.1	Oleibacter marinus	484498	FALSE	TRUE	FALSE	TRUE
1332	GCA_002873195.1	Vibrio sp. 10N.286.48.B7	1880853	TRUE	TRUE	FALSE	FALSE
1333	GCA_013283385.1	Marinobacterium sp. xm-d-510	2497735	TRUE	TRUE	FALSE	FALSE
1334	GCA_002687695.1	Acidobacteria bacterium	1978231	TRUE	TRUE	FALSE	FALSE
1335	GCA_000219855.1	Sulfobacillus acidophilus	1051632	TRUE	TRUE	FALSE	FALSE
1336	GCA_002873455.1	Vibrio splendidus	29497	TRUE	TRUE	FALSE	FALSE
1337	GCA_900103215.1	Kriegella aquimaris	192904	TRUE	TRUE	FALSE	FALSE
1338	GCA_001907195.1	Pontibacter flavimaris	1797110	TRUE	TRUE	FALSE	FALSE
1339	GCA_002695265.1	Croceibacter sp.	2024829	TRUE	TRUE	FALSE	FALSE
1340	GCA_009914765.1	Halodesulfovibrio sp. MK-HDV	2599925	TRUE	TRUE	FALSE	FALSE
1341	GCA_002685565.1	Haliea sp.	1932666	TRUE	TRUE	FALSE	FALSE
1342	GCA_002685075.1	Arcobacter sp.	1872629	FALSE	TRUE	FALSE	TRUE
1343	GCA_002703665.1	Alcanivorax sp.	1872427	TRUE	TRUE	FALSE	FALSE
1344	GCA_000422205.1	Desulfovibrio sp. X2	941449	TRUE	TRUE	FALSE	FALSE
1345	GCA_002729875.1	Chromatiales bacterium	2026725	TRUE	TRUE	FALSE	FALSE
1346	GCA_001303825.1	Gemmatimonas sp. SM23_52	1703359	TRUE	TRUE	FALSE	FALSE
1347	GCA_002717655.1	Phycisphaerae bacterium	2026778	TRUE	TRUE	FALSE	FALSE
1348	GCA_002689045.1	Verrucomicrobiales bacterium	2026801	TRUE	TRUE	FALSE	FALSE
1349	GCA_001507315.1	Micromonospora maris	1003110	FALSE	TRUE	FALSE	TRUE
1350	GCA_002687205.1	Flammeovirgaceae bacterium	2026740	TRUE	TRUE	FALSE	FALSE
1351	GCA_005116645.1	Desulfopila sp. IMCC35006	2569542	TRUE	TRUE	FALSE	FALSE
1352	GCA_002694155.1	Pusillimonas sp. (ex Stolz et al. 2005)	1979962	TRUE	TRUE	FALSE	FALSE
1353	GCA_002608565.1	Vibrio sp. PID17_43	1583451	TRUE	TRUE	FALSE	FALSE
1354	GCA_002723455.1	Pseudoalteromonas sp. 3D05	2045444	TRUE	TRUE	FALSE	FALSE
1355	GCA_001593005.1	Roseivirga ehrenbergii	279360	TRUE	TRUE	FALSE	FALSE
1356	GCA_014164545.1	Shewanella sp. SG41-3	2760977	TRUE	TRUE	FALSE	FALSE
1357	GCA_002687175.1	Parcubacteria group bacterium	2026774	TRUE	TRUE	FALSE	FALSE
1358	GCA_000179315.1	delta proteobacterium NaphS2	88274	TRUE	TRUE	FALSE	FALSE
1359	GCA_001634935.1	Oleiphilus sp. HI0043	1822233	TRUE	TRUE	FALSE	FALSE
1360	GCA_009711525.1	Fulvivirga lutimaris	1819566	TRUE	TRUE	FALSE	FALSE
1361	GCA_002705105.1	Alteromonas sp.	232	TRUE	TRUE	FALSE	FALSE
1362	GCA_002729055.1	Dehalococcoidia bacterium	2026734	TRUE	FALSE	FALSE	TRUE
1363	GCA_002710945.1	Leeuwenhoekiella sp.	1977054	TRUE	TRUE	FALSE	FALSE
1364	GCA_002876185.1	Vibrio sp. 10N.261.51.A7	1884472	TRUE	TRUE	FALSE	FALSE
1365	GCA_013364375.1	Streptomyces sp. NA03103	2742134	FALSE	TRUE	FALSE	TRUE
1366	GCA_014164505.1	Shewanella sp. SG41-4	2760976	TRUE	TRUE	FALSE	FALSE
1367	GCA_002714095.1	Alcanivorax sp.	1872427	TRUE	TRUE	FALSE	FALSE
1368	GCA_000219105.1	Myxococcus fulvus	483219	FALSE	TRUE	FALSE	TRUE
1369	GCA_014164015.1	Pseudoalteromonas sp. SR41-1	2760952	TRUE	TRUE	FALSE	FALSE
1370	GCA_002700285.1	Crocinitomicaceae bacterium	2026728	TRUE	TRUE	FALSE	FALSE
1371	GCA_000521805.1	Marinomonas ushuaiensis	1122207	TRUE	TRUE	FALSE	FALSE
1372	GCA_002712245.1	Candidatus Marinimicrobia bacterium	2026760	TRUE	TRUE	FALSE	FALSE
1373	GCA_900156695.1	Phaeovulum vinaykumarii	407234	TRUE	TRUE	FALSE	FALSE
1374	GCA_002710625.1	Alcanivorax sp.	1872427	TRUE	TRUE	FALSE	FALSE
1375	GCA_002954605.1	Polaribacter butkevichii	218490	TRUE	TRUE	FALSE	FALSE
1376	GCA_001430865.1	Nonlabens sp. MIC269	1476901	TRUE	TRUE	FALSE	FALSE
1377	GCA_002726045.1	Alcanivorax sp.	1872427	TRUE	TRUE	FALSE	FALSE
1378	GCA_001690975.1	Aliivibrio fischeri	668	TRUE	TRUE	FALSE	FALSE
1379	GCA_010669285.1	Kineobactrum salinum	2708301	TRUE	TRUE	FALSE	FALSE
1380	GCA_002711065.1	Candidatus Marinimicrobia bacterium	2026760	TRUE	TRUE	FALSE	FALSE
1381	GCA_002695495.1	Pedosphaera sp.	2024890	TRUE	TRUE	FALSE	FALSE
1382	GCA_900105645.1	Desulfobacula phenolica	90732	FALSE	TRUE	FALSE	TRUE
1383	GCA_002715205.1	Crocinitomicaceae bacterium	2026728	TRUE	TRUE	FALSE	FALSE
1384	GCA_001302905.1	Latescibacteria bacterium DG_63	1703781	TRUE	TRUE	FALSE	FALSE
1385	GCA_002683405.1	Salinisphaeraceae bacterium	2026789	TRUE	TRUE	FALSE	FALSE
1386	GCA_020147925.1	Cytobacillus oceanisediminis	665099	TRUE	TRUE	FALSE	FALSE
1387	GCA_002591705.1	Phycisphaerae bacterium	2026778	TRUE	TRUE	FALSE	FALSE
1388	GCA_002700305.1	Hyphomonas sp.	87	TRUE	TRUE	FALSE	FALSE
1389	GCA_001635845.1	Oleiphilus sp. HI0132	1822270	TRUE	TRUE	FALSE	FALSE
1390	GCA_002712885.1	Acidobacteria bacterium	1978231	TRUE	TRUE	FALSE	FALSE
1391	GCA_002729925.1	Sphingobium sp.	1912891	TRUE	TRUE	FALSE	FALSE
1392	GCA_004327985.1	Marinobacter halodurans	2528979	FALSE	TRUE	FALSE	TRUE
1393	GCA_002713845.1	Pseudoalteromonas sp.	53249	TRUE	TRUE	FALSE	FALSE
1394	GCA_002714925.1	Idiomarina sp.	1874361	TRUE	TRUE	FALSE	FALSE
1395	GCA_000740735.1	Nitrosococcus oceani	1229	TRUE	TRUE	FALSE	FALSE
1396	GCA_000315055.1	Paraglaciecola polaris	1129793	TRUE	TRUE	FALSE	FALSE
1397	GCA_002695945.1	Marinimicrobium sp.	2024837	TRUE	TRUE	FALSE	FALSE
1398	GCA_002688835.1	Colwelliaceae bacterium	2026726	TRUE	TRUE	FALSE	FALSE
1399	GCA_008085455.1	Seonamhaeicola marinus	1912246	TRUE	TRUE	FALSE	FALSE
1400	GCA_000760295.1	Prochlorococcus sp. MIT 0701	1499502	TRUE	TRUE	FALSE	FALSE
1401	GCA_002690945.1	Gammaproteobacteria bacterium	1913989	TRUE	TRUE	FALSE	FALSE
1402	GCA_002716825.1	Halobacteriovorax sp.	2020862	TRUE	TRUE	FALSE	FALSE
1403	GCA_011742065.1	Aquabacterium sp. A08	2718532	TRUE	TRUE	FALSE	FALSE
1404	GCA_002877365.1	Vibrio sp. 10N.261.55.A7	1880851	TRUE	TRUE	FALSE	FALSE
1405	GCA_002724675.1	Deltaproteobacteria bacterium	2026735	TRUE	TRUE	FALSE	FALSE
1406	GCA_000215895.1	Shewanella baltica	693970	TRUE	TRUE	FALSE	FALSE
1407	GCA_009363815.1	Pseudomonas sp. THAF7b	2587845	FALSE	TRUE	FALSE	TRUE
1408	GCA_014163975.1	Pseudoalteromonas sp. SR41-5	2760949	TRUE	TRUE	FALSE	FALSE
1409	GCA_002729675.1	Idiomarina sp.	1874361	TRUE	TRUE	FALSE	FALSE
1410	GCA_002954705.1	Aliivibrio sifiae	566293	TRUE	TRUE	FALSE	FALSE
1411	GCA_002685175.1	Pseudoalteromonas sp.	53249	TRUE	TRUE	FALSE	FALSE
1412	GCA_002688055.1	Bdellovibrionaceae bacterium	2026715	TRUE	TRUE	FALSE	FALSE
1413	GCA_002705245.1	Dehalococcoidia bacterium	2026734	TRUE	TRUE	FALSE	FALSE
1414	GCA_002684505.1	Gammaproteobacteria bacterium	1913989	TRUE	TRUE	FALSE	FALSE
1415	GCA_000819565.1	Celeribacter indicus	1208324	FALSE	TRUE	FALSE	TRUE
1416	GCA_000171895.1	Hydrogenivirga sp. 128-5-R1-1	392423	TRUE	TRUE	FALSE	FALSE
1417	GCA_000155655.1	Nitrosococcus oceani	473788	TRUE	TRUE	FALSE	FALSE
1418	GCA_002076895.1	Cognaticolwellia beringensis	1967665	TRUE	TRUE	FALSE	FALSE
1419	GCA_002684195.1	Hyphomonas sp.	87	TRUE	TRUE	FALSE	FALSE
1420	GCA_002715465.1	Candidatus Marinimicrobia bacterium	2026760	TRUE	TRUE	FALSE	FALSE
1421	GCA_003671915.1	Alcaligenes aquatilis	323284	FALSE	TRUE	FALSE	TRUE
1422	GCA_002717875.1	Candidatus Marinimicrobia bacterium	2026760	TRUE	TRUE	FALSE	FALSE
1423	GCA_010468565.1	Muricauda sp. TY007	2683200	TRUE	TRUE	FALSE	FALSE
1424	GCA_010748895.1	Brevibacillus sp. 7WMA2	2683193	FALSE	TRUE	FALSE	TRUE
1425	GCA_002730695.1	Rhodobiaceae bacterium	2026785	TRUE	TRUE	FALSE	FALSE
1426	GCA_002717605.1	Crocinitomicaceae bacterium	2026728	TRUE	TRUE	FALSE	FALSE
1427	GCA_002729035.1	Candidatus Marinimicrobia bacterium	2026760	TRUE	TRUE	FALSE	FALSE
1428	GCA_002701945.1	Candidatus Marinimicrobia bacterium	2026760	TRUE	TRUE	FALSE	FALSE
1429	GCA_002683585.1	Cryomorphaceae bacterium	1898111	TRUE	TRUE	FALSE	FALSE
1430	GCA_002724995.1	Anaerolineaceae bacterium	2024896	TRUE	TRUE	FALSE	FALSE
1431	GCA_002703185.1	Crocinitomicaceae bacterium	2026728	TRUE	TRUE	FALSE	FALSE
1432	GCA_000280055.1	Alishewanella aestuarii	1197174	TRUE	TRUE	FALSE	FALSE
1433	GCA_003933245.1	Maribacter algicola	2498892	TRUE	TRUE	FALSE	FALSE
1434	GCA_004212325.1	Escherichia sp. E13S3	2484854	FALSE	TRUE	FALSE	TRUE
1435	GCA_001303405.1	Nitrospira bacterium SG8_35_4	1704025	TRUE	TRUE	FALSE	FALSE
1436	GCA_001029435.1	Photobacterium aphoticum	754436	TRUE	TRUE	FALSE	FALSE
1437	GCA_002683555.1	Aequorivita sp.	1872390	TRUE	TRUE	FALSE	FALSE
1438	GCA_001458275.1	Thalassobius autumnalis	2072972	FALSE	TRUE	FALSE	TRUE
1439	GCA_001403915.1	Roseibium aggregatum	187304	FALSE	TRUE	FALSE	TRUE
1440	GCA_001458255.1	Thalassobius autumnalis	2072972	FALSE	TRUE	FALSE	TRUE
1441	GCA_001458235.1	Cognatishimia activa	1715691	FALSE	TRUE	TRUE	FALSE
1442	GCA_001458335.1	Cognatishimia activa	1715691	FALSE	TRUE	TRUE	FALSE
1443	GCA_000338295.1	Rhodopirellula europaea	1263867	FALSE	TRUE	FALSE	TRUE
1444	GCA_001458195.1	Ruegeria atlantica	81569	TRUE	TRUE	FALSE	FALSE
1445	GCA_000383715.1	Verrucomicrobia bacterium SCGC AAA164-E04	1009415	TRUE	TRUE	FALSE	FALSE
1446	GCA_902634135.1	uncultured Marinoscillum sp.	932004	TRUE	TRUE	FALSE	FALSE
1447	GCA_000280905.1	Streptomyces sp. AA1529	1203257	FALSE	TRUE	FALSE	TRUE
1448	GCA_900473935.1	Synechococcus sp. P1	102120	TRUE	TRUE	FALSE	FALSE
1449	GCA_008033385.1	Algibacter pacificus	2599389	TRUE	TRUE	FALSE	FALSE
1450	GCA_902549205.1	uncultured Marinoscillum sp.	932004	TRUE	TRUE	FALSE	FALSE
1451	GCA_000423165.1	Pseudidiomarina sediminum	1122124	TRUE	TRUE	FALSE	FALSE
1452	GCA_900185595.1	Calothrix rhizosoleniae	439482	FALSE	TRUE	FALSE	TRUE
1453	GCA_000688335.1	Sediminibacter sp. Hel_I_10	1392490	TRUE	TRUE	FALSE	FALSE
1454	GCA_000259675.1	Salinispora arenicola	1149863	FALSE	TRUE	FALSE	TRUE
1455	GCA_902527555.1	uncultured Marinoscillum sp.	932004	TRUE	TRUE	FALSE	FALSE
1456	GCA_011378975.1	Cellulophaga sp. Z1A5H	2687291	TRUE	TRUE	FALSE	FALSE
1457	GCA_902569235.1	uncultured Balneola sp.	555950	TRUE	TRUE	FALSE	FALSE
1458	GCA_003667275.1	Mesonia aquimarina	1504967	TRUE	TRUE	FALSE	FALSE
1459	GCA_013033705.1	Ruegeria sp. HKCCA0370	2682995	TRUE	TRUE	FALSE	FALSE
1460	GCA_002019595.1	Priestia abyssalis	1221450	TRUE	TRUE	FALSE	FALSE
1461	GCA_009193215.1	Flavicella marina	1475951	TRUE	TRUE	FALSE	FALSE
1462	GCA_902626295.1	uncultured Candidatus Actinomarina sp.	1985113	TRUE	TRUE	FALSE	FALSE
1463	GCA_000405465.1	Marinimicrobia bacterium SCGC AAA003-E22	699266	TRUE	TRUE	FALSE	FALSE
1464	GCA_902579425.1	uncultured Candidatus Actinomarina sp.	1985113	TRUE	TRUE	FALSE	FALSE
1465	GCA_902609815.1	uncultured Pelagicoccus sp.	1002210	FALSE	TRUE	FALSE	TRUE
1466	GCA_000220705.2	Streptomyces xinghaiensis	1038929	FALSE	TRUE	FALSE	TRUE
1467	GCA_902563535.1	uncultured Candidatus Marinimicrobia bacterium	195045	TRUE	TRUE	FALSE	FALSE
1468	GCA_008711525.1	Cysteiniphilum sp. JM-1	2610891	FALSE	TRUE	FALSE	TRUE
1469	GCA_000421585.1	Thermodesulfatator atlanticus	1123371	TRUE	TRUE	FALSE	FALSE
1470	GCA_003283585.1	bacterium AG-316-D23	2161887	TRUE	TRUE	FALSE	FALSE
1471	GCA_902521955.1	uncultured Candidatus Actinomarina sp.	1985113	TRUE	TRUE	FALSE	FALSE
1472	GCA_000688295.1	Pseudooceanicola nanhaiensis	1122614	FALSE	TRUE	FALSE	TRUE
1473	GCA_902636265.1	uncultured Marinoscillum sp.	932004	TRUE	TRUE	FALSE	FALSE
1474	GCA_002010655.1	Candidatus Hydrothermae bacterium JdFR-74	1935125	TRUE	TRUE	FALSE	FALSE
1475	GCA_003214855.1	Prochlorococcus sp. AG-412-I05	2162496	TRUE	TRUE	FALSE	FALSE
1476	GCA_902605885.1	uncultured Roseobacter sp.	114847	TRUE	TRUE	FALSE	FALSE
1477	GCA_000720335.1	Marmoricola aequoreus	397278	TRUE	TRUE	FALSE	FALSE
1478	GCA_000420665.1	Ponticaulis koreensis	551789	TRUE	TRUE	FALSE	FALSE
1479	GCA_004305975.1	Streptomyces otsuchiensis	2681388	FALSE	TRUE	FALSE	TRUE
1480	GCA_000472285.1	Desulfuromonas sp. TF	1232410	TRUE	TRUE	FALSE	FALSE
1481	GCA_003208815.1	Synechococcus sp. AG-683-B03	2161969	FALSE	TRUE	FALSE	TRUE
1482	GCA_000428585.1	Zooshikella ganghwensis	1123509	FALSE	TRUE	FALSE	TRUE
1483	GCA_002010615.1	bacterium JdFR-70	1935014	TRUE	TRUE	FALSE	FALSE
1484	GCA_011378805.1	Pseudoalteromonas sp. Z9A6	2686352	TRUE	TRUE	FALSE	FALSE
1485	GCA_007567505.1	Shewanella donghaensis	238836	TRUE	TRUE	FALSE	FALSE
1486	GCA_003865345.1	Nonlabens xiamenensis	2341043	TRUE	TRUE	FALSE	FALSE
1487	GCA_009671245.1	Marinicella rhabdoformis	2580566	TRUE	TRUE	FALSE	FALSE
1488	GCA_003281445.1	Prochlorococcus sp. AG-347-K02	2162144	FALSE	TRUE	FALSE	TRUE
1489	GCA_002010475.1	Anaerolineales bacterium JdFR-60	1935095	TRUE	TRUE	FALSE	FALSE
1490	GCA_002010715.1	Candidatus Aminicenantes bacterium JdFR-79	1935109	TRUE	TRUE	FALSE	FALSE
1491	GCA_003313245.1	Primorskyibacter marinus	1977320	TRUE	TRUE	FALSE	FALSE
1492	GCA_902636035.1	uncultured Candidatus Marinimicrobia bacterium	195045	TRUE	TRUE	FALSE	FALSE
1493	GCA_008001015.1	Serinicoccus profundi	1078471	TRUE	TRUE	FALSE	FALSE
1494	GCA_000420385.1	Hippea alviniae	944480	FALSE	TRUE	FALSE	TRUE
1495	GCA_000744395.1	Halomonas sp. TG39a	1415755	FALSE	TRUE	FALSE	TRUE
1496	GCA_000635115.1	Prochlorococcus sp. scB245a_518K17	1471507	TRUE	TRUE	FALSE	FALSE
1497	GCA_902580845.1	uncultured Candidatus Actinomarina sp.	1985113	FALSE	TRUE	FALSE	TRUE
1498	GCA_902510375.1	uncultured Candidatus Marinimicrobia bacterium	195045	TRUE	TRUE	FALSE	FALSE
1499	GCA_902624275.1	uncultured Candidatus Marinimicrobia bacterium	195045	TRUE	TRUE	FALSE	FALSE
1500	GCA_002010535.1	Thermoanaerobacterales bacterium JdFR-68	1935151	TRUE	TRUE	FALSE	FALSE
1501	GCA_003210565.1	Synechococcus sp. AG-683-A02	2161955	TRUE	FALSE	FALSE	TRUE
1502	GCA_001681635.1	Tritonibacter mobilis	379347	TRUE	TRUE	FALSE	FALSE
1503	GCA_003402235.1	Parahaliea mediterranea	651086	TRUE	TRUE	FALSE	FALSE
1504	GCA_008711555.1	Francisella sp. SYW-3	2600578	TRUE	TRUE	FALSE	FALSE
1505	GCA_003284145.1	Prochlorococcus sp. AG-315-K21	2162432	FALSE	TRUE	FALSE	TRUE
1506	GCA_000256485.1	Vibrio splendidus	530557	TRUE	TRUE	FALSE	FALSE
1507	GCA_902630305.1	uncultured Marinoscillum sp.	932004	TRUE	TRUE	FALSE	FALSE
1508	GCA_902529365.1	uncultured Balneola sp.	555950	TRUE	TRUE	FALSE	FALSE
1509	GCA_002011565.1	bacterium JdFR-65	1935011	TRUE	TRUE	FALSE	FALSE
1510	GCA_001682055.1	Tritonibacter mobilis	379347	FALSE	TRUE	FALSE	TRUE
1511	GCA_000429365.1	Pseudodonghicola xiamenensis	1121479	TRUE	TRUE	FALSE	FALSE
1512	GCA_007923265.1	Francisella salimarina	2599927	TRUE	TRUE	FALSE	FALSE
1513	GCA_902525955.1	uncultured Marinoscillum sp.	932004	TRUE	TRUE	FALSE	FALSE
1514	GCA_000473165.1	Leisingera aquimarina	999611	FALSE	TRUE	FALSE	TRUE
1515	GCA_002010815.1	Pseudomonas sp. JdFR-91	1935000	TRUE	TRUE	FALSE	FALSE
1516	GCA_002010545.1	Anaerolineales bacterium JdFR-64	1935099	TRUE	TRUE	FALSE	FALSE
1517	GCA_003347495.1	Pleomorphovibrio marinus	2164132	FALSE	TRUE	FALSE	TRUE
1518	GCA_004360145.1	Aliiroseovarius marinus	2500159	FALSE	TRUE	FALSE	TRUE
1519	GCA_003281085.1	OCS155 cluster bacterium AG-349-E07	2162613	TRUE	TRUE	FALSE	FALSE
1520	GCA_004369005.1	Rheinheimera aquimaris	412437	FALSE	TRUE	FALSE	TRUE
1521	GCA_902559145.1	uncultured Marinoscillum sp.	932004	TRUE	TRUE	FALSE	FALSE
1522	GCA_000341125.1	Nocardiopsis lucentensis	1246460	FALSE	TRUE	FALSE	TRUE
1523	GCA_902629855.1	uncultured Candidatus Marinimicrobia bacterium	195045	TRUE	TRUE	FALSE	FALSE
1524	GCA_000397965.1	Parcubacteria bacterium SCGC AAA040-L21	1052844	TRUE	TRUE	FALSE	FALSE
1525	GCA_013403955.1	Winogradskyella vidalii	2615024	TRUE	TRUE	FALSE	FALSE
1526	GCA_902581045.1	uncultured Candidatus Marinimicrobia bacterium	195045	TRUE	TRUE	FALSE	FALSE
1527	GCA_000300815.1	Gayadomonas joobiniege	1046714	TRUE	TRUE	FALSE	FALSE
1528	GCA_902537075.1	uncultured Candidatus Actinomarina sp.	1985113	TRUE	TRUE	FALSE	FALSE
1529	GCA_000423045.1	Gramella portivictoriae	1121932	TRUE	TRUE	FALSE	FALSE
1530	GCA_001655635.1	Photobacterium sp. J15	265901	FALSE	TRUE	FALSE	TRUE
1531	GCA_002010595.1	Peptococcaceae bacterium JdFR-69	1935150	TRUE	TRUE	FALSE	FALSE
1532	GCA_902578385.1	uncultured Candidatus Marinimicrobia bacterium	195045	TRUE	TRUE	FALSE	FALSE
1533	GCA_013033505.1	Ruegeria sp. HKCCA6948	2682997	FALSE	TRUE	FALSE	TRUE
1534	GCA_016817355.1	Maricaulis parjimensis	144023	TRUE	TRUE	FALSE	FALSE
1535	GCA_004522175.1	Paracoccus ravus	2447760	FALSE	TRUE	FALSE	TRUE
1536	GCA_000385295.1	Verrucomicrobia bacterium SCGC AAA164-N20	1009419	TRUE	TRUE	FALSE	FALSE
1537	GCA_000421285.1	Desulfotignum balticum	1304886	FALSE	TRUE	FALSE	TRUE
1538	GCA_001681755.1	Tritonibacter mobilis	379347	TRUE	TRUE	FALSE	FALSE
1539	GCA_003209655.1	Prochlorococcus sp. AG-442-M23	2162323	TRUE	TRUE	FALSE	FALSE
1540	GCA_013414345.1	Chryseoglobus indicus	2750620	TRUE	TRUE	FALSE	FALSE
1541	GCA_016888515.1	Shimia biformata	1294299	TRUE	TRUE	FALSE	FALSE
1542	GCA_001401755.1	Aquimarina longa	1379258	FALSE	TRUE	FALSE	TRUE
1543	GCA_902551005.1	uncultured Candidatus Actinomarina sp.	1985113	TRUE	TRUE	FALSE	FALSE
1544	GCA_000382325.1	Woodsholea maritima	1123503	TRUE	TRUE	FALSE	FALSE
1545	GCA_902633365.1	uncultured Candidatus Actinomarina sp.	1985113	TRUE	TRUE	FALSE	FALSE
1546	GCA_902625925.1	uncultured Candidatus Marinimicrobia bacterium	195045	TRUE	TRUE	FALSE	FALSE
1547	GCA_003283485.1	bacterium AG-316-P04	2161893	TRUE	TRUE	FALSE	FALSE
1548	GCA_002320695.1	Myxococcales bacterium UBA1671	1961463	TRUE	TRUE	FALSE	FALSE
1549	GCA_000422425.1	Oceanospirillum beijerinckii	1122616	FALSE	TRUE	FALSE	TRUE
1550	GCA_002471515.1	Myxococcales bacterium UBA7319	1961471	TRUE	TRUE	FALSE	FALSE
1551	GCA_001591105.1	Vibrio nereis	1219068	TRUE	TRUE	FALSE	FALSE
1552	GCA_003574425.1	Cysteiniphilum halobium	2219059	TRUE	TRUE	FALSE	FALSE
1553	GCA_000422285.1	Desulfatiglans anilini	1121399	TRUE	TRUE	FALSE	FALSE
1554	GCA_000383775.1	Saccharomonospora halophila	928729	TRUE	TRUE	FALSE	FALSE
1555	GCA_012955605.1	Bacillus fonticola	2728853	TRUE	TRUE	FALSE	FALSE
1556	GCA_003390845.1	Tropicimonas sp. IMCC34043	2248760	FALSE	TRUE	FALSE	TRUE
1557	GCA_902525985.1	uncultured Formosa sp.	255435	TRUE	TRUE	FALSE	FALSE
1558	GCA_002010915.1	Desulfarculaceae bacterium JdFR-97	1935136	TRUE	TRUE	FALSE	FALSE
1559	GCA_013404005.1	Winogradskyella forsetii	2686077	TRUE	TRUE	FALSE	FALSE
1560	GCA_006346335.1	Aequorivita sinensis	1382458	TRUE	TRUE	FALSE	FALSE
1561	GCA_902616605.1	uncultured Marinoscillum sp.	932004	TRUE	TRUE	FALSE	FALSE
1562	GCA_002309695.1	Myxococcales bacterium UBA1203	1961459	TRUE	TRUE	FALSE	FALSE
1563	GCA_011378875.1	Pseudoalteromonas sp. Z9A5	2686355	TRUE	TRUE	FALSE	FALSE
1564	GCA_003990445.1	Pararhodobacter zhoushanensis	2479545	FALSE	TRUE	TRUE	FALSE
1565	GCA_001681595.1	Tritonibacter mobilis	379347	FALSE	TRUE	FALSE	TRUE
1566	GCA_009828585.1	Shewanella litoralis	2282700	TRUE	TRUE	FALSE	FALSE
1567	GCA_011378745.1	Pseudoalteromonas sp. Z1A6	2686349	TRUE	TRUE	FALSE	FALSE
1568	GCA_902540675.1	uncultured Synechococcus sp.	154535	TRUE	TRUE	FALSE	FALSE
1569	GCA_000744105.1	Maribacter forsetii	1392498	TRUE	TRUE	FALSE	FALSE
1570	GCA_902603565.1	uncultured Candidatus Marinimicrobia bacterium	195045	TRUE	TRUE	FALSE	FALSE
1571	GCA_902529115.1	uncultured Balneola sp.	555950	TRUE	TRUE	FALSE	FALSE
1572	GCA_013394655.1	Winogradskyella schleiferi	2686078	TRUE	TRUE	FALSE	FALSE
1573	GCA_002011575.1	bacterium JdFR-66	1935012	TRUE	TRUE	FALSE	FALSE
1574	GCA_003283775.1	Prochlorococcus sp. AG-311-L21	2162392	FALSE	TRUE	FALSE	TRUE
1575	GCA_902621915.1	uncultured Marinoscillum sp.	932004	TRUE	TRUE	FALSE	FALSE
1576	GCA_902596545.1	uncultured Candidatus Actinomarina sp.	1985113	TRUE	TRUE	FALSE	FALSE
1577	GCA_902611255.1	uncultured Candidatus Marinimicrobia bacterium	195045	FALSE	TRUE	TRUE	FALSE
1578	GCA_902579755.1	uncultured Candidatus Marinimicrobia bacterium	195045	TRUE	TRUE	FALSE	FALSE
1579	GCA_011378755.1	Pseudoalteromonas sp. Z1A2	2686350	TRUE	TRUE	FALSE	FALSE
1580	GCA_003347575.1	Tritonibacter mobilis	379347	TRUE	TRUE	FALSE	FALSE
1581	GCA_001683035.1	Tritonibacter mobilis	379347	FALSE	TRUE	FALSE	TRUE
1582	GCA_013394595.1	Winogradskyella forsetii	2686077	TRUE	TRUE	FALSE	FALSE
1583	GCA_000425505.1	Flavobacterium frigidarium	1121890	TRUE	TRUE	FALSE	FALSE
1584	GCA_000378345.1	Hirschia maritima	551275	TRUE	TRUE	FALSE	FALSE
1585	GCA_902526805.1	uncultured Formosa sp.	255435	TRUE	TRUE	FALSE	FALSE
1586	GCA_000382405.1	Mycobacterium sp. 141	1120797	FALSE	TRUE	FALSE	TRUE
1587	GCA_000377745.1	Gilvimarinus chinensis	1121921	TRUE	TRUE	FALSE	FALSE
1588	GCA_001681265.1	Tritonibacter mobilis	379347	TRUE	TRUE	FALSE	FALSE
1589	GCA_000423405.1	Mesonia mobilis	1122226	TRUE	TRUE	FALSE	FALSE
1590	GCA_000374485.1	Algicola sagamiensis	1120963	FALSE	TRUE	FALSE	TRUE
1591	GCA_003215955.1	Prochlorococcus sp. AG-409-C21	2162269	FALSE	TRUE	FALSE	TRUE
1592	GCA_003216435.1	Prochlorococcus sp. AG-402-N21	2162096	FALSE	TRUE	FALSE	TRUE
1593	GCA_001681895.1	Tritonibacter mobilis	379347	FALSE	TRUE	FALSE	TRUE
1594	GCA_003313305.1	Vallitalea guaymasensis	1185412	FALSE	TRUE	FALSE	TRUE
1595	GCA_001681765.1	Tritonibacter mobilis	379347	FALSE	TRUE	FALSE	TRUE
1596	GCA_902635765.1	uncultured Formosa sp.	255435	TRUE	TRUE	FALSE	FALSE
1597	GCA_002010455.1	Dehalococcoides sp. JdFR-58	1935051	TRUE	TRUE	FALSE	FALSE
1598	GCA_000297635.1	Streptomyces sp. AA0539	1210045	FALSE	TRUE	FALSE	TRUE
1599	GCA_902598235.1	uncultured Candidatus Actinomarina sp.	1985113	TRUE	TRUE	FALSE	FALSE
1600	GCA_004959925.1	Pseudooceanicola onchidii	2562279	TRUE	TRUE	FALSE	FALSE
1601	GCA_001899445.1	Candidatus Desulfopertinax cowenii	1919273	TRUE	TRUE	FALSE	FALSE
1602	GCA_002836975.1	Shewanella indica	768528	TRUE	TRUE	FALSE	FALSE
1603	GCA_002395385.1	Myxococcales bacterium UBA4248	1961467	TRUE	TRUE	FALSE	FALSE
1604	GCA_013033515.1	Ruegeria sp. HKCCA6707	2682996	FALSE	TRUE	FALSE	TRUE
1605	GCA_902608015.1	uncultured Candidatus Marinimicrobia bacterium	195045	TRUE	TRUE	FALSE	FALSE
1606	GCA_009832865.1	Colwellia sp. 20A7	2689569	TRUE	TRUE	FALSE	FALSE
1607	GCA_001696575.1	Nitratireductor aquibiodomus	204799	FALSE	TRUE	FALSE	TRUE
1608	GCA_003171655.1	Sphingosinithalassobacter portus	2676234	TRUE	TRUE	FALSE	FALSE
1609	GCA_902632385.1	uncultured Candidatus Marinimicrobia bacterium	195045	TRUE	TRUE	FALSE	FALSE
1610	GCA_000687935.1	Polaribacter sp. Hel_I_88	1250006	TRUE	TRUE	FALSE	FALSE
1611	GCA_902512275.1	uncultured Marinoscillum sp.	932004	TRUE	TRUE	FALSE	FALSE
1612	GCA_902584035.1	uncultured Candidatus Marinimicrobia bacterium	195045	TRUE	TRUE	FALSE	FALSE
1613	GCA_009193265.1	Marinobacter changyiensis	2604091	TRUE	TRUE	FALSE	FALSE
1614	GCA_900474295.1	Synechococcus sp. P1	102120	TRUE	TRUE	FALSE	FALSE
1615	GCA_000405005.1	Candidatus Altimarinus pacificus	1104584	TRUE	TRUE	FALSE	FALSE
1616	GCA_003283945.1	Prochlorococcus sp. AG-316-P23	2162439	FALSE	TRUE	FALSE	TRUE
1617	GCA_001682075.1	Tritonibacter mobilis	379347	FALSE	TRUE	FALSE	TRUE
1618	GCA_902523065.1	uncultured Marinoscillum sp.	932004	TRUE	TRUE	FALSE	FALSE
1619	GCA_002309015.1	Myxococcales bacterium UBA1238	1961460	TRUE	TRUE	FALSE	FALSE
1620	GCA_004006665.1	Halobacteriovorax sp. HLS	2234000	TRUE	TRUE	FALSE	FALSE
1621	GCA_002010665.1	Candidatus Aminicenantes bacterium JdFR-78	1935108	TRUE	TRUE	FALSE	FALSE
1622	GCA_902563935.1	uncultured Candidatus Actinomarina sp.	1985113	FALSE	TRUE	FALSE	TRUE
1623	GCA_002011675.1	Candidatus Hydrothermae bacterium JdFR-73	1935124	TRUE	TRUE	FALSE	FALSE
1624	GCA_002011415.1	Candidatus Acetothermia bacterium JdFR-47	1935101	TRUE	TRUE	FALSE	FALSE
1625	GCA_000402655.1	Marinimicrobia bacterium SCGC AAA298-D23	939857	TRUE	TRUE	FALSE	FALSE
1626	GCA_000382125.1	Eudoraea adriatica	1121875	TRUE	TRUE	FALSE	FALSE
1627	GCA_000482725.1	Psychromonas arctica	1123036	TRUE	TRUE	FALSE	FALSE
1628	GCA_902626505.1	uncultured Marinoscillum sp.	932004	TRUE	TRUE	FALSE	FALSE
1629	GCA_003209225.1	Pelagibacteraceae bacterium AG-464-B04	2162007	TRUE	TRUE	FALSE	FALSE
1630	GCA_001653135.1	Pseudoalteromonas neustonica	1840331	TRUE	TRUE	FALSE	FALSE
1631	GCA_902587475.1	uncultured Candidatus Marinimicrobia bacterium	195045	TRUE	TRUE	FALSE	FALSE
1632	GCA_902565645.1	uncultured Candidatus Actinomarina sp.	1985113	TRUE	TRUE	FALSE	FALSE
1633	GCA_902623005.1	uncultured Coxiella sp.	189542	TRUE	FALSE	FALSE	TRUE
1634	GCA_003212455.1	Prochlorococcus sp. AG-436-P23	2162322	FALSE	TRUE	FALSE	TRUE
1635	GCA_009765275.1	Chachezhania sediminis	2599291	FALSE	TRUE	FALSE	TRUE
1636	GCA_902516385.1	uncultured Candidatus Marinimicrobia bacterium	195045	TRUE	TRUE	FALSE	FALSE
1637	GCA_000429945.1	Desulfogranum japonicum	1121403	TRUE	TRUE	FALSE	FALSE
1638	GCA_002010845.1	Pseudomonas sp. JdFR-92	1935001	FALSE	TRUE	FALSE	TRUE
1639	GCA_014235875.1	Croceivirga lutea	1775167	TRUE	TRUE	FALSE	FALSE
1640	GCA_001681735.1	Tritonibacter mobilis	379347	TRUE	TRUE	FALSE	FALSE
1641	GCA_000423125.1	Haliea salexigens	1121937	TRUE	TRUE	FALSE	FALSE
1642	GCA_000420745.1	Pseudorhodobacter ferrugineus	1123027	FALSE	TRUE	FALSE	TRUE
1643	GCA_902535815.1	uncultured Candidatus Actinomarina sp.	1985113	TRUE	TRUE	FALSE	FALSE
1644	GCA_902525525.1	uncultured Coxiella sp.	189542	TRUE	FALSE	FALSE	TRUE
1645	GCA_902555335.1	uncultured Marinoscillum sp.	932004	TRUE	TRUE	FALSE	FALSE
1646	GCA_000405805.1	Marinimicrobia bacterium SCGC AAA003-L08	939844	TRUE	TRUE	FALSE	FALSE
1647	GCA_011378845.1	Pseudoalteromonas sp. Z9A4	2686353	TRUE	TRUE	FALSE	FALSE
1648	GCA_013394615.1	Winogradskyella forsetii	2686077	TRUE	TRUE	FALSE	FALSE
1649	GCA_000422845.1	Oceanobacter kriegii	1122615	TRUE	TRUE	FALSE	FALSE
1650	GCA_902605145.1	uncultured Formosa sp.	255435	TRUE	TRUE	FALSE	FALSE
1651	GCA_002011425.1	Candidatus Acetothermia bacterium JdFR-48	1935102	TRUE	TRUE	FALSE	FALSE
1652	GCA_001466305.1	Defluviitalea phaphyphila	1473580	TRUE	TRUE	FALSE	FALSE
1653	GCA_015240255.1	Kordiimonas pumila	2161677	FALSE	TRUE	FALSE	TRUE
1654	GCA_000426765.1	Vibrio litoralis	1123493	TRUE	TRUE	FALSE	FALSE
1655	GCA_003216715.1	Prochlorococcus sp. AG-402-L09	2162088	TRUE	TRUE	FALSE	FALSE
1656	GCA_000423005.1	Gelidibacter mesophilus	1121912	FALSE	TRUE	FALSE	TRUE
1657	GCA_902574205.1	uncultured Candidatus Hydrogenedens sp.	1817954	TRUE	TRUE	FALSE	FALSE
1658	GCA_902616255.1	uncultured Synechococcus sp.	154535	TRUE	TRUE	FALSE	FALSE
1659	GCA_003209565.1	Prochlorococcus sp. AG-449-J16	2162525	FALSE	TRUE	FALSE	TRUE
1660	GCA_002010355.1	Candidatus Acetothermia bacterium JdFR-49	1935103	TRUE	TRUE	FALSE	FALSE
1661	GCA_001681875.1	Tritonibacter mobilis	379347	FALSE	TRUE	FALSE	TRUE
1662	GCA_000374105.1	Kangiella aquimarina	261965	TRUE	TRUE	FALSE	FALSE
1663	GCA_902631315.1	uncultured Marinoscillum sp.	932004	TRUE	TRUE	FALSE	FALSE
1664	GCA_003214755.1	Prochlorococcus sp. AG-412-L10	2162499	TRUE	TRUE	FALSE	FALSE
1665	GCA_000259615.1	Salinispora arenicola	391967	FALSE	TRUE	FALSE	TRUE
1666	GCA_002380655.1	Myxococcales bacterium UBA4151	1961466	TRUE	TRUE	FALSE	FALSE
1667	GCA_902516685.1	uncultured Formosa sp.	255435	TRUE	TRUE	FALSE	FALSE
1668	GCA_002011845.1	Desulfarculaceae bacterium JdFR-96	1935135	TRUE	TRUE	FALSE	FALSE
1669	GCA_902630085.1	uncultured Candidatus Marinimicrobia bacterium	195045	TRUE	TRUE	FALSE	FALSE
1670	GCA_902629655.1	uncultured Candidatus Marinimicrobia bacterium	195045	TRUE	TRUE	FALSE	FALSE
1671	GCA_902519475.1	uncultured Thiothrix sp.	223185	FALSE	TRUE	FALSE	TRUE
1672	GCA_902602795.1	uncultured Candidatus Marinimicrobia bacterium	195045	TRUE	TRUE	FALSE	FALSE
1673	GCA_002011815.1	Nitrospirae bacterium JdFR-86	1935147	TRUE	TRUE	FALSE	FALSE
1674	GCA_004115085.1	Longirhabdus pacifica	2305227	FALSE	TRUE	FALSE	TRUE
1675	GCA_001659685.2	Labilibacter marinus	1477105	TRUE	TRUE	FALSE	FALSE
1676	GCA_011378715.1	Psychromonas sp. SA13A	2686346	TRUE	TRUE	FALSE	FALSE
1677	GCA_000365025.1	Robiginitomaculum antarcticum	1123059	TRUE	TRUE	FALSE	FALSE
1678	GCA_011378855.1	Pseudoalteromonas sp. Z1A8	2686354	TRUE	TRUE	FALSE	FALSE
1679	GCA_002011685.1	Deferribacteres bacterium JdFR-76	1935133	TRUE	TRUE	FALSE	FALSE
1680	GCA_000402795.1	Marinimicrobia bacterium SCGC AAA160-C11	1007122	TRUE	TRUE	FALSE	FALSE
1681	GCA_002344285.1	Myxococcales bacterium UBA2376	1961464	TRUE	TRUE	FALSE	FALSE
1682	GCA_000258765.1	Gillisia marina	1167637	TRUE	TRUE	FALSE	FALSE
1683	GCA_002011495.1	Dehalococcoides sp. JdFR-56	1935049	TRUE	TRUE	FALSE	FALSE
1684	GCA_011784865.1	Leeuwenhoekiella sp. ZYFB001	2719912	TRUE	TRUE	FALSE	FALSE
1685	GCA_003049725.1	Oceanimonas marisflavi	2059724	TRUE	TRUE	FALSE	FALSE
1686	GCA_000379485.1	Wenxinia marina	1123501	FALSE	TRUE	FALSE	TRUE
1687	GCA_011378705.1	Pseudoalteromonas sp. SA25	2686347	TRUE	TRUE	FALSE	FALSE
1688	GCA_002010385.1	Candidatus Acetothermia bacterium JdFR-52	1935106	TRUE	TRUE	FALSE	FALSE
1689	GCA_000621705.1	Prolixibacter bellariivorans	1408473	FALSE	TRUE	TRUE	FALSE
1690	GCA_011784885.1	Nonlabens sp. SY33080	2719911	TRUE	TRUE	FALSE	FALSE
1691	GCA_008711455.1	Francisella sp. XLW-1	2610887	TRUE	TRUE	FALSE	FALSE
1692	GCA_000429305.1	Desulfovibrio inopinatus	1121453	FALSE	TRUE	FALSE	TRUE
1693	GCA_000425705.1	Halobacillus kuroshimensis	1121938	TRUE	TRUE	FALSE	FALSE
1694	GCA_902613625.1	uncultured Balneola sp.	555950	TRUE	TRUE	FALSE	FALSE
1695	GCA_000397945.1	Parcubacteria bacterium SCGC AAA036-E14	1052848	TRUE	TRUE	FALSE	FALSE
1696	GCA_008711475.1	Francisella sp. SYW-2	2610886	TRUE	TRUE	FALSE	FALSE
1697	GCA_902569845.1	uncultured Candidatus Actinomarina sp.	1985113	TRUE	TRUE	FALSE	FALSE
1698	GCA_002011735.1	Nitrospirae bacterium JdFR-81	1935142	TRUE	TRUE	FALSE	FALSE
1699	GCA_001681305.1	Tritonibacter mobilis	379347	TRUE	TRUE	FALSE	FALSE
1700	GCA_000746275.1	Thermopetrobacter sp. TC1	1495045	TRUE	TRUE	FALSE	FALSE
1701	GCA_001681605.1	Tritonibacter mobilis	379347	FALSE	TRUE	FALSE	TRUE
1702	GCA_000430665.1	Aquimarina muelleri	1121007	FALSE	TRUE	FALSE	TRUE
1703	GCA_000621625.1	Crocinitomix catalasitica	1408433	TRUE	TRUE	FALSE	FALSE
1704	GCA_002011825.1	Pseudomonas sp. JdFR-93	1935002	FALSE	TRUE	FALSE	TRUE
1705	GCA_002011655.1	Anaerolineales bacterium JdFR-63	1935098	TRUE	TRUE	FALSE	FALSE
1706	GCA_002453135.1	Myxococcales bacterium UBA6777	1961469	TRUE	TRUE	FALSE	FALSE
1707	GCA_003259185.1	Alcanivorax indicus	2202653	TRUE	TRUE	FALSE	FALSE
1708	GCA_018141545.1	Miltoncostaea oceani	2843216	TRUE	TRUE	FALSE	FALSE
1709	GCA_002150785.1	Arenibacter amylolyticus	1406873	FALSE	TRUE	FALSE	TRUE
1710	GCA_000422365.1	Mesoflavibacter zeaxanthinifaciens	1122225	TRUE	TRUE	FALSE	FALSE
1711	GCA_902544355.1	uncultured Balneola sp.	555950	TRUE	TRUE	FALSE	FALSE
1712	GCA_001753705.1	Streptomyces nanshensis	518642	FALSE	TRUE	FALSE	TRUE
1713	GCA_000429125.1	Aequorivita capsosiphonis	1120951	TRUE	TRUE	FALSE	FALSE
1714	GCA_002010685.1	Candidatus Aminicenantes bacterium JdFR-77	1935107	TRUE	TRUE	FALSE	FALSE
1715	GCA_000383735.1	Verrucomicrobia bacterium SCGC AAA164-M04	1009418	TRUE	TRUE	FALSE	FALSE
1716	GCA_002010365.1	Candidatus Acetothermia bacterium JdFR-50	1935104	TRUE	TRUE	FALSE	FALSE
1717	GCA_000717715.1	Streptomyces sp. NRRL B-24484	1463833	FALSE	TRUE	FALSE	TRUE
1718	GCA_902570475.1	uncultured Candidatus Marinimicrobia bacterium	195045	TRUE	TRUE	FALSE	FALSE
1719	GCA_902529555.1	uncultured Candidatus Marinimicrobia bacterium	195045	TRUE	TRUE	FALSE	FALSE
1720	GCA_018141525.1	Miltoncostaea marina	2843215	TRUE	TRUE	FALSE	FALSE
1721	GCA_902557615.1	uncultured Marinoscillum sp.	932004	TRUE	TRUE	FALSE	FALSE
1722	GCA_002087335.1	Pseudophaeobacter leonis	1144477	FALSE	TRUE	FALSE	TRUE
1723	GCA_002408385.1	Myxococcales bacterium UBA5297	1961468	FALSE	TRUE	FALSE	TRUE
1724	GCA_000420085.1	Desulfospira joergensenii	1265505	TRUE	TRUE	FALSE	FALSE
1725	GCA_003990645.1	Shimia sediminis	2497945	TRUE	TRUE	FALSE	FALSE
1726	GCA_004022545.1	Vibrio chagasii	170679	TRUE	TRUE	FALSE	FALSE
1727	GCA_000373405.1	Streptomyces sp. ScaeMP-e10	1156841	FALSE	TRUE	FALSE	TRUE
1728	GCA_902572085.1	uncultured Candidatus Actinomarina sp.	1985113	TRUE	TRUE	FALSE	FALSE
1729	GCA_902619625.1	uncultured Marinoscillum sp.	932004	TRUE	TRUE	FALSE	FALSE
1730	GCA_000745455.1	Mesoaciditoga lauensis	1150474	TRUE	TRUE	FALSE	FALSE
1731	GCA_002011435.1	Candidatus Acetothermia bacterium JdFR-51	1935105	TRUE	TRUE	FALSE	FALSE
1732	GCA_000429485.1	Aliagarivorans marinus	1120969	TRUE	TRUE	FALSE	FALSE
1733	GCA_000379445.1	Fangia hongkongensis	1089439	TRUE	TRUE	FALSE	FALSE
1734	GCA_000421165.1	Marinobacter daepoensis	1122197	TRUE	TRUE	FALSE	FALSE
1735	GCA_003211205.1	Synechococcus sp. AG-673-F03	2161948	TRUE	TRUE	FALSE	FALSE
1736	GCA_001681645.1	Tritonibacter mobilis	379347	FALSE	TRUE	FALSE	TRUE
1737	GCA_000422385.1	Microbacterium indicum	1122238	TRUE	TRUE	FALSE	FALSE
1738	GCA_000402815.1	Marinimicrobia bacterium SCGC AAA160-I06	1007123	TRUE	TRUE	FALSE	FALSE
1739	GCA_902532845.1	uncultured Candidatus Marinimicrobia bacterium	195045	TRUE	TRUE	FALSE	FALSE
1740	GCA_902624155.1	uncultured Candidatus Marinimicrobia bacterium	195045	TRUE	TRUE	FALSE	FALSE
1741	GCA_004010055.1	Psychroflexus aestuariivivens	1795040	TRUE	TRUE	FALSE	FALSE
1742	GCA_902575395.1	uncultured Candidatus Marinimicrobia bacterium	195045	TRUE	TRUE	FALSE	FALSE
1743	GCA_000379805.1	Lewinella cohaerens	1122176	TRUE	TRUE	FALSE	FALSE
1744	GCA_002298025.1	Myxococcales bacterium UBA727	1961470	TRUE	TRUE	FALSE	FALSE
1745	GCA_902615185.1	uncultured Marinoscillum sp.	932004	TRUE	TRUE	FALSE	FALSE
1746	GCA_000334155.1	Halalkalibacterium ligniniphilum	1134413	TRUE	TRUE	FALSE	FALSE
1747	GCA_902588755.1	uncultured Candidatus Actinomarina sp.	1985113	TRUE	TRUE	FALSE	FALSE
1748	GCA_000429965.1	Desulfogranum mediterraneum	1121404	TRUE	TRUE	FALSE	FALSE
1749	GCA_000429505.1	Aliagarivorans taiwanensis	1120970	TRUE	TRUE	FALSE	FALSE
1750	GCA_001681255.1	Tritonibacter mobilis	379347	FALSE	TRUE	FALSE	TRUE
1751	GCA_002722165.1	Candidatus Pelagibacter sp.	2024849	FALSE	TRUE	FALSE	FALSE
1752	GCA_002726285.1	Planctomycetaceae bacterium	2026779	FALSE	TRUE	FALSE	FALSE
1753	GCA_900177335.1	Kocuria indica	1049583	TRUE	FALSE	FALSE	FALSE
1754	GCA_002722705.1	Bdellovibrionaceae bacterium	2026715	FALSE	TRUE	FALSE	FALSE
1755	GCA_002731595.1	Thalassospira sp.	1912094	FALSE	TRUE	FALSE	FALSE
1756	GCA_002720615.1	Alteromonadaceae bacterium	1916082	FALSE	TRUE	FALSE	FALSE
1757	GCA_002703585.1	Halieaceae bacterium	2026743	FALSE	TRUE	FALSE	FALSE
1758	GCA_002691725.1	SAR116 cluster bacterium	2024888	FALSE	TRUE	FALSE	FALSE
1759	GCA_002713215.1	Crocinitomicaceae bacterium	2026728	FALSE	TRUE	FALSE	FALSE
1760	GCA_001971785.1	Seonamhaeicola sp. S2-3	1936081	FALSE	TRUE	FALSE	FALSE
1761	GCA_002876375.1	Vibrio breoganii	553239	FALSE	TRUE	FALSE	FALSE
1762	GCA_002873595.1	Vibrio breoganii	553239	FALSE	TRUE	FALSE	FALSE
1763	GCA_000016065.1	Shewanella loihica	359303	FALSE	TRUE	FALSE	FALSE
1764	GCA_002101295.1	Candidatus Pelagibacter sp. RS40	1977865	FALSE	TRUE	FALSE	FALSE
1765	GCA_002700545.1	Rhodobiaceae bacterium	2026785	FALSE	TRUE	FALSE	FALSE
1766	GCA_002707685.1	Porticoccus sp.	2024853	FALSE	TRUE	FALSE	FALSE
1767	GCA_002690495.1	Legionellales bacterium	2026754	FALSE	TRUE	FALSE	FALSE
1768	GCA_002724315.1	Planctomycetaceae bacterium	2026779	FALSE	TRUE	FALSE	FALSE
1769	GCA_002730655.1	Balneola sp.	2024824	FALSE	TRUE	FALSE	FALSE
1770	GCA_002709365.1	Sphingomonadaceae bacterium	1930536	FALSE	TRUE	FALSE	FALSE
1771	GCA_009296265.1	Thioclava sp. JE_KL1	2651187	FALSE	TRUE	FALSE	FALSE
1772	GCA_000808575.1	Alteromonas marina	203795	FALSE	TRUE	FALSE	FALSE
1773	GCA_014837295.1	Cellulosimicrobium arenosum	2708133	FALSE	TRUE	FALSE	FALSE
1774	GCA_002691385.1	Flammeovirgaceae bacterium	2026740	FALSE	TRUE	FALSE	FALSE
1775	GCA_002703425.1	Aurantimonas sp.	1872654	FALSE	TRUE	FALSE	FALSE
1776	GCA_002696985.1	Mesonia sp.	1960830	FALSE	TRUE	FALSE	FALSE
1777	GCA_007163885.2	Halomonas axialensis	115555	FALSE	TRUE	FALSE	FALSE
1778	GCA_000284615.1	Marinobacter nauticus	1163748	FALSE	TRUE	FALSE	FALSE
1779	GCA_002724975.1	Parcubacteria group bacterium	2026774	TRUE	FALSE	FALSE	FALSE
1780	GCA_002727325.1	Rhodobacterales bacterium	1948890	FALSE	TRUE	FALSE	FALSE
1781	GCA_900115865.1	Donghicola eburneus	393278	FALSE	TRUE	FALSE	FALSE
1782	GCA_002694405.1	Thalassospira sp.	1912094	FALSE	TRUE	FALSE	FALSE
1783	GCA_002237755.1	Lysinibacillus sp. KCTC 33748	1955700	FALSE	TRUE	FALSE	FALSE
1784	GCA_002710955.1	Altererythrobacter sp.	1872480	FALSE	TRUE	FALSE	FALSE
1785	GCA_000828615.1	Thiolapillus brandeum	1076588	FALSE	TRUE	FALSE	FALSE
1786	GCA_014076755.1	Psychrobacter sp. Urea-trap-18	2759807	FALSE	TRUE	FALSE	FALSE
1787	GCA_000314955.1	Paraglaciecola chathamensis	1127672	FALSE	TRUE	FALSE	FALSE
1788	GCA_002691425.1	Roseobacter sp.	1907202	FALSE	TRUE	FALSE	FALSE
1789	GCA_002699245.1	Aestuariivita sp.	1872407	FALSE	TRUE	FALSE	FALSE
1790	GCA_003544895.1	Profundibacter amoris	2171755	FALSE	TRUE	FALSE	FALSE
1791	GCA_900107015.1	Litoreibacter albidus	670155	FALSE	TRUE	FALSE	FALSE
1792	GCA_002722455.1	Chloroflexi bacterium	2026724	FALSE	TRUE	FALSE	FALSE
1793	GCA_009363255.1	Roseivivax sp. THAF197b	2588299	FALSE	TRUE	FALSE	FALSE
1794	GCA_001692855.1	Thalassospira sp. KO164	1798192	FALSE	TRUE	FALSE	FALSE
1795	GCA_002687375.1	Porticoccaceae bacterium	2026782	FALSE	TRUE	FALSE	FALSE
1796	GCA_002689325.1	Rickettsiales bacterium	2026788	FALSE	TRUE	FALSE	FALSE
1797	GCA_000760035.1	Prochlorococcus marinus	167548	FALSE	TRUE	FALSE	FALSE
1798	GCA_002693665.1	Pusillimonas sp. (ex Stolz et al. 2005)	1979962	FALSE	TRUE	FALSE	FALSE
1799	GCA_002696115.1	Roseovarius sp.	1486281	FALSE	TRUE	FALSE	FALSE
1800	GCA_003026475.1	Photobacterium lipolyticum	266810	FALSE	TRUE	FALSE	FALSE
1801	GCA_002704145.1	Pelagibacteraceae bacterium	2026775	FALSE	TRUE	FALSE	FALSE
1802	GCA_002720815.1	Acidobacteria bacterium	1978231	FALSE	TRUE	FALSE	FALSE
1803	GCA_000759975.1	Prochlorococcus marinus	74545	FALSE	TRUE	FALSE	FALSE
1804	GCA_002710565.1	Pseudomonadales bacterium	1891229	FALSE	TRUE	FALSE	FALSE
1805	GCA_002684055.1	Gammaproteobacteria bacterium	1913989	FALSE	TRUE	FALSE	FALSE
1806	GCA_002686465.1	Candidatus Woesebacteria bacterium	2026804	FALSE	TRUE	FALSE	FALSE
1807	GCA_002690125.1	Pseudomonadales bacterium	1891229	FALSE	TRUE	FALSE	FALSE
1808	GCA_002723125.1	Chloroflexi bacterium	2026724	FALSE	TRUE	FALSE	FALSE
1809	GCA_001635735.1	Oleiphilus sp. HI0067	1822243	FALSE	TRUE	FALSE	FALSE
1810	GCA_003667205.1	Kocuria indica	1049583	TRUE	FALSE	FALSE	FALSE
1811	GCA_009830125.1	Kangsaoukella pontilimi	2691042	FALSE	TRUE	FALSE	FALSE
1812	GCA_002714985.1	Flammeovirgaceae bacterium	2026740	FALSE	TRUE	FALSE	FALSE
1813	GCA_002694415.1	Citromicrobium sp.	2024827	FALSE	TRUE	FALSE	FALSE
1814	GCA_002721015.1	Rhodobiaceae bacterium	2026785	FALSE	TRUE	FALSE	FALSE
1815	GCA_002691705.1	Candidatus Pelagibacter sp.	2024849	FALSE	TRUE	FALSE	FALSE
1816	GCA_000760095.1	Prochlorococcus marinus	167551	FALSE	TRUE	FALSE	FALSE
1817	GCA_900129845.1	Cognatiyoonia sediminum	1508389	FALSE	TRUE	FALSE	FALSE
1818	GCA_002706965.1	Pseudoalteromonas sp.	53249	FALSE	TRUE	FALSE	FALSE
1819	GCA_002718055.1	Marinobacter sp.	50741	FALSE	TRUE	FALSE	FALSE
1820	GCA_002696035.1	Balneola sp.	2024824	FALSE	TRUE	FALSE	FALSE
1821	GCA_013378055.1	Parasphingopyxis sp. CP4	2724527	FALSE	TRUE	FALSE	FALSE
1822	GCA_002699085.1	Micavibrio sp.	2024841	FALSE	TRUE	FALSE	FALSE
1823	GCA_002731745.1	Candidatus Marinimicrobia bacterium	2026760	FALSE	TRUE	FALSE	FALSE
1824	GCA_002691405.1	Halieaceae bacterium	2026743	FALSE	TRUE	FALSE	FALSE
1825	GCA_009363555.1	Sulfitobacter sp. THAF37	2587855	FALSE	TRUE	FALSE	FALSE
1826	GCA_003151255.1	Microvirga sp. 17 mud 1-3	2082949	TRUE	FALSE	FALSE	FALSE
1827	GCA_002696905.1	Rhodospirillaceae bacterium	1898112	FALSE	TRUE	FALSE	FALSE
1828	GCA_002720555.1	Nitrospinae bacterium	2026769	FALSE	TRUE	FALSE	FALSE
1829	GCA_000759855.1	Prochlorococcus marinus	59921	FALSE	TRUE	FALSE	FALSE
1830	GCA_010500845.1	unclassified	111500	FALSE	TRUE	FALSE	FALSE
1831	GCA_001635265.1	Oleiphilus sp. HI0118	1822262	FALSE	TRUE	FALSE	FALSE
1832	GCA_002718435.1	Flammeovirgaceae bacterium	2026740	FALSE	TRUE	FALSE	FALSE
1833	GCA_001908835.1	Marivivens sp. JLT3646	1920883	FALSE	TRUE	FALSE	FALSE
1834	GCA_002704825.1	Phycisphaeraceae bacterium	2026777	FALSE	TRUE	FALSE	FALSE
1835	GCA_020148005.1	Modicisalibacter tunisiensis	390637	FALSE	TRUE	FALSE	FALSE
1836	GCA_004347715.1	Halomonas sp. 204	2546095	FALSE	TRUE	FALSE	FALSE
1837	GCA_000155895.1	Candidatus Pelagibacter sp. HTCC7211	439493	FALSE	TRUE	FALSE	FALSE
1838	GCA_002726205.1	Planctomycetaceae bacterium	2026779	FALSE	TRUE	FALSE	FALSE
1839	GCA_002704845.1	Candidatus Marinimicrobia bacterium	2026760	FALSE	TRUE	FALSE	FALSE
1840	GCA_002689405.1	Gammaproteobacteria bacterium	1913989	FALSE	TRUE	FALSE	FALSE
1841	GCA_002687565.1	Acidiferrobacteraceae bacterium	2024893	FALSE	TRUE	FALSE	FALSE
1842	GCA_012276755.1	Marichromatium bheemlicum	365339	FALSE	TRUE	FALSE	FALSE
1843	GCA_001999545.1	Thermosipho melanesiensis	46541	FALSE	TRUE	FALSE	FALSE
1844	GCA_002697905.1	Flammeovirgaceae bacterium	2026740	FALSE	TRUE	FALSE	FALSE
1845	GCA_008830225.1	Pseudodesulfovibrio senegalensis	1721087	FALSE	TRUE	FALSE	FALSE
1846	GCA_002954405.1	Salinibacter sp. 10B	1923971	FALSE	TRUE	FALSE	FALSE
1847	GCA_002724475.1	Candidatus Marinimicrobia bacterium	2026760	FALSE	TRUE	FALSE	FALSE
1848	GCA_900215465.1	Muricauda parva	1247520	FALSE	TRUE	FALSE	FALSE
1849	GCA_002727195.1	Gemmatimonadetes bacterium	2026742	FALSE	TRUE	FALSE	FALSE
1850	GCA_000283275.1	Marinobacter sp. BSs20148	490759	FALSE	TRUE	FALSE	FALSE
1851	GCA_002705465.1	Halieaceae bacterium	2026743	FALSE	TRUE	FALSE	FALSE
1852	GCA_001635715.1	Oleiphilus sp. HI0065	1822241	FALSE	TRUE	FALSE	FALSE
1853	GCA_000342165.1	Pacificimonas flava	1234595	FALSE	TRUE	FALSE	FALSE
1854	GCA_900108075.1	Oleiphilus messinensis	141451	FALSE	TRUE	FALSE	FALSE
1855	GCA_001635615.1	Oleiphilus sp. HI0050	1822236	FALSE	TRUE	FALSE	FALSE
1856	GCA_001039635.1	Crocosphaera watsonii	1284629	TRUE	FALSE	FALSE	FALSE
1857	GCA_002684215.1	Stappia sp.	1870903	FALSE	TRUE	FALSE	FALSE
1858	GCA_012241385.1	Solimonas marina	2714601	FALSE	TRUE	FALSE	FALSE
1859	GCA_000445475.1	Sulfurimonas hongkongensis	1172190	FALSE	TRUE	FALSE	FALSE
1860	GCA_002877685.1	Vibrio breoganii	553239	FALSE	TRUE	FALSE	FALSE
1861	GCA_900155945.1	Marinobacterium stanieri	49186	FALSE	TRUE	FALSE	FALSE
1862	GCA_002876625.1	Vibrio breoganii	553239	FALSE	TRUE	FALSE	FALSE
1863	GCA_013283315.1	Marinobacterium sp. xm-g-59	2497748	FALSE	TRUE	FALSE	FALSE
1864	GCA_002875285.1	Vibrio breoganii	553239	FALSE	TRUE	FALSE	FALSE
1865	GCA_000328625.1	Halobacteroides halobius	748449	FALSE	TRUE	FALSE	FALSE
1866	GCA_002692825.1	Brevundimonas sp.	1871086	FALSE	TRUE	FALSE	FALSE
1867	GCA_002706165.1	Pseudomonas sp.	306	FALSE	TRUE	FALSE	FALSE
1868	GCA_002695955.1	Hyphomonadaceae bacterium	2026748	FALSE	TRUE	FALSE	FALSE
1869	GCA_002704615.1	Cellvibrionales bacterium	2026722	FALSE	TRUE	FALSE	FALSE
1870	GCA_002721355.1	Phycisphaerae bacterium	2026778	TRUE	FALSE	FALSE	FALSE
1871	GCA_005771405.1	Zongyanglinia marina	2578117	FALSE	TRUE	FALSE	FALSE
1872	GCA_002877145.1	Vibrio breoganii	553239	FALSE	TRUE	FALSE	FALSE
1873	GCA_002686175.1	Sphingomonadaceae bacterium	1930536	FALSE	TRUE	FALSE	FALSE
1874	GCA_002694085.1	Marinovum sp.	2024839	FALSE	TRUE	FALSE	FALSE
1875	GCA_002722775.1	Rhodospirillaceae bacterium	1898112	FALSE	TRUE	FALSE	FALSE
1876	GCA_002710155.1	Halomonadaceae bacterium	2026746	FALSE	TRUE	FALSE	FALSE
1877	GCA_002728915.1	Micrococcales bacterium	2026762	TRUE	FALSE	FALSE	FALSE
1878	GCA_001304345.1	Dehalococcoidia bacterium DG_18	1703392	FALSE	TRUE	FALSE	FALSE
1879	GCA_002707645.1	Candidatus Marinimicrobia bacterium	2026760	FALSE	TRUE	FALSE	FALSE
1880	GCA_002689225.1	Afipia sp.	1871052	FALSE	TRUE	FALSE	FALSE
1881	GCA_002692605.1	Opitutae bacterium	2026771	FALSE	TRUE	FALSE	FALSE
1882	GCA_002688445.1	Dehalococcoidia bacterium	2026734	FALSE	TRUE	FALSE	FALSE
1883	GCA_002692155.1	Rhodobacteraceae bacterium	1904441	FALSE	TRUE	FALSE	FALSE
1884	GCA_002717265.1	Pelagibacterales bacterium	2026776	FALSE	TRUE	FALSE	FALSE
1885	GCA_002690595.1	Rickettsiales bacterium	2026788	FALSE	TRUE	FALSE	FALSE
1886	GCA_001458435.1	Thalassobius mediterraneus	340021	FALSE	TRUE	FALSE	FALSE
1887	GCA_002270055.1	Anaeromicrobium sediminis	1478221	FALSE	TRUE	FALSE	FALSE
1888	GCA_900156625.1	Zobellia uliginosa	143224	FALSE	TRUE	FALSE	FALSE
1889	GCA_014076785.1	Colwellia sp. MB3u-55	2759810	FALSE	TRUE	FALSE	FALSE
1890	GCA_002729125.1	Acidimicrobiaceae bacterium	2024894	FALSE	TRUE	FALSE	FALSE
1891	GCA_002688935.1	Aestuariibacter sp.	1872400	FALSE	TRUE	FALSE	FALSE
1892	GCA_014705715.1	Erythrobacter rubeus	2760803	FALSE	TRUE	FALSE	FALSE
1893	GCA_002700145.1	Gordonia sp.	84139	FALSE	FALSE	FALSE	TRUE
1894	GCA_002707795.1	Maricaulis sp.	1486257	FALSE	TRUE	FALSE	FALSE
1895	GCA_002721165.1	Legionellales bacterium	2026754	FALSE	TRUE	FALSE	FALSE
1896	GCA_001303885.1	Planctomycetes bacterium SM23_32	1704029	FALSE	TRUE	FALSE	FALSE
1897	GCA_002683515.1	Rhodobiaceae bacterium	2026785	FALSE	TRUE	FALSE	FALSE
1898	GCA_002684135.1	Roseobacter sp.	1907202	FALSE	TRUE	FALSE	FALSE
1899	GCA_009371975.2	Marinisubtilis pacificus	2591847	TRUE	FALSE	FALSE	FALSE
1900	GCA_002686605.1	Oceanospirillaceae bacterium	1899355	FALSE	TRUE	FALSE	FALSE
1901	GCA_002715745.1	Woeseiaceae bacterium	2026806	FALSE	TRUE	FALSE	FALSE
1902	GCA_002683435.1	Marinobacter sp.	50741	FALSE	TRUE	FALSE	FALSE
1903	GCA_002715085.1	Flavobacterium sp.	239	FALSE	TRUE	FALSE	FALSE
1904	GCA_002712255.1	Alphaproteobacteria bacterium	1913988	FALSE	TRUE	FALSE	FALSE
1905	GCA_011308835.1	Paracoccus xiamenensis	2714901	FALSE	TRUE	FALSE	FALSE
1906	GCA_002731735.1	Gemmatimonadetes bacterium	2026742	FALSE	TRUE	FALSE	FALSE
1907	GCA_900188045.1	Jannaschia aquimarina	935700	FALSE	TRUE	FALSE	FALSE
1908	GCA_002717765.1	Candidatus Marinimicrobia bacterium	2026760	FALSE	TRUE	FALSE	FALSE
1909	GCA_000147355.1	Sulfurimonas autotrophica	563040	FALSE	TRUE	FALSE	FALSE
1910	GCA_000760055.1	Prochlorococcus marinus	167549	FALSE	TRUE	FALSE	FALSE
1911	GCA_002877285.1	Vibrio breoganii	553239	FALSE	TRUE	FALSE	FALSE
1912	GCA_014297445.1	Ramlibacter sp. GTP1	2079448	FALSE	TRUE	FALSE	FALSE
1913	GCA_002699305.1	Martelella sp.	1969699	FALSE	TRUE	FALSE	FALSE
1914	GCA_003944755.1	Rhodovulum robiginosum	68292	FALSE	TRUE	FALSE	FALSE
1915	GCA_002697735.1	Halomonas sp.	1486246	FALSE	TRUE	FALSE	FALSE
1916	GCA_002719115.1	Gemmatimonadetes bacterium	2026742	FALSE	TRUE	FALSE	FALSE
1917	GCA_004793685.1	Marinicauda algicola	2029849	FALSE	TRUE	FALSE	FALSE
1918	GCA_002708185.1	Candidatus Marinimicrobia bacterium	2026760	FALSE	TRUE	FALSE	FALSE
1919	GCA_002702485.1	Opitutae bacterium	2026771	FALSE	TRUE	FALSE	FALSE
1920	GCA_002714885.1	Pseudomonadales bacterium	1891229	FALSE	TRUE	FALSE	FALSE
1921	GCA_002722645.1	Acidobacteria bacterium	1978231	FALSE	TRUE	FALSE	FALSE
1922	GCA_002729885.1	Spirochaetaceae bacterium	1898206	FALSE	TRUE	FALSE	FALSE
1923	GCA_001303345.1	Desulfobacterales bacterium SG8_35	1703400	FALSE	TRUE	FALSE	FALSE
1924	GCA_002710765.1	Rickettsiales bacterium	2026788	FALSE	TRUE	FALSE	FALSE
1925	GCA_000023465.1	Zunongwangia profunda	655815	FALSE	TRUE	FALSE	FALSE
1926	GCA_002718595.1	Gemmatimonadetes bacterium	2026742	FALSE	TRUE	FALSE	FALSE
1927	GCA_018394335.1	Shewanella dokdonensis	712036	FALSE	TRUE	FALSE	FALSE
1928	GCA_002692855.1	Maricaulis sp.	1486257	FALSE	TRUE	FALSE	FALSE
1929	GCA_002691345.1	Synechococcus sp. MED650	2024882	FALSE	TRUE	FALSE	FALSE
1930	GCA_003789015.1	Altererythrobacter sp. FM1	2484537	FALSE	TRUE	FALSE	FALSE
1931	GCA_002691795.1	SAR116 cluster bacterium	2024888	FALSE	TRUE	FALSE	FALSE
1932	GCA_005938215.1	Ruegeria sediminis	2583820	FALSE	TRUE	FALSE	FALSE
1933	GCA_002708715.1	Candidatus Marinimicrobia bacterium	2026760	FALSE	TRUE	FALSE	FALSE
1934	GCA_002716665.1	Gammaproteobacteria bacterium	1913989	FALSE	TRUE	FALSE	FALSE
1935	GCA_900141795.1	Sulfurivirga caldicuralii	364032	FALSE	TRUE	FALSE	FALSE
1936	GCA_002689385.1	Phycisphaerae bacterium	2026778	FALSE	TRUE	FALSE	FALSE
1937	GCA_002708825.1	Phyllobacteriaceae bacterium	1871068	FALSE	TRUE	FALSE	FALSE
1938	GCA_000294555.1	Thermotoga sp. EMP	1157949	FALSE	TRUE	FALSE	FALSE
1939	GCA_001635005.1	Oleibacter sp. HI0075	1822250	FALSE	TRUE	FALSE	FALSE
1940	GCA_000307935.1	SAR86 cluster bacterium SAR86E	1208365	FALSE	TRUE	FALSE	FALSE
1941	GCA_003987475.1	Idiomarina tyrosinivorans	1445662	FALSE	TRUE	FALSE	FALSE
1942	GCA_001458355.1	Thalassobius gelatinovorus	53501	FALSE	TRUE	FALSE	FALSE
1943	GCA_002712845.1	Rhodopirellula sp.	2024855	TRUE	FALSE	FALSE	FALSE
1944	GCA_002721215.1	Cobetia sp.	1873876	FALSE	TRUE	FALSE	FALSE
1945	GCA_002873135.1	Shewanella sp. 10N.286.48.A6	1880833	FALSE	TRUE	FALSE	FALSE
1946	GCA_002684535.1	Pelagibacteraceae bacterium	2026775	FALSE	TRUE	FALSE	FALSE
1947	GCA_001563225.1	Pseudodesulfovibrio indicus	1716143	FALSE	TRUE	FALSE	FALSE
1948	GCA_002705795.1	Gammaproteobacteria bacterium	1913989	FALSE	TRUE	FALSE	FALSE
1949	GCA_001989415.1	Prochlorococcus sp. RS50	1924285	FALSE	TRUE	FALSE	FALSE
1950	GCA_002692285.1	Rhodobiaceae bacterium	2026785	FALSE	TRUE	FALSE	FALSE
1951	GCA_004332405.1	Synechococcus sp. BS56D	2055944	FALSE	TRUE	FALSE	FALSE
1952	GCA_002700885.1	Hyphomonadaceae bacterium	2026748	FALSE	TRUE	FALSE	FALSE
1953	GCA_002721555.1	Rhodopirellula sp.	2024855	FALSE	TRUE	FALSE	FALSE
1954	GCA_007859955.1	Botrimarina colliarenosi	2528001	FALSE	TRUE	FALSE	FALSE
1955	GCA_900114275.1	Celeribacter marinus	1397108	FALSE	TRUE	FALSE	FALSE
1956	GCA_002722325.1	Candidatus Marinimicrobia bacterium	2026760	FALSE	TRUE	FALSE	FALSE
1957	GCA_002711715.1	Pelagibacteraceae bacterium	2026775	FALSE	TRUE	FALSE	FALSE
1958	GCA_002700125.1	Dehalococcoidia bacterium	2026734	FALSE	TRUE	FALSE	FALSE
1959	GCA_002695925.1	Henriciella sp.	1968823	FALSE	TRUE	FALSE	FALSE
1960	GCA_005938225.1	Arenibacterium halophilum	2583821	FALSE	TRUE	FALSE	FALSE
1961	GCA_002716865.1	Dehalococcoidia bacterium	2026734	FALSE	TRUE	FALSE	FALSE
1962	GCA_009856295.1	Pontibacillus yanchengensis	462910	FALSE	TRUE	FALSE	FALSE
1963	GCA_002724695.1	Alphaproteobacteria bacterium	1913988	FALSE	TRUE	FALSE	FALSE
1964	GCA_002721825.1	Magnetovibrio sp.	2024836	FALSE	TRUE	FALSE	FALSE
1965	GCA_002690255.1	Rhodobacteraceae bacterium	1904441	FALSE	TRUE	FALSE	FALSE
1966	GCA_002707065.1	Oceanospirillaceae bacterium	1899355	FALSE	TRUE	FALSE	FALSE
1967	GCA_002705265.1	Pelagibacteraceae bacterium	2026775	FALSE	TRUE	FALSE	FALSE
1968	GCA_002723375.1	Dehalococcoidia bacterium	2026734	FALSE	TRUE	FALSE	FALSE
1969	GCA_003576595.1	Pusillimonas maritima	2026239	FALSE	TRUE	FALSE	FALSE
1970	GCA_002716745.1	Gammaproteobacteria bacterium	1913989	FALSE	TRUE	FALSE	FALSE
1971	GCA_002722175.1	Magnetovibrio sp.	2024836	FALSE	TRUE	FALSE	FALSE
1972	GCA_001758195.1	Pseudohongiella acticola	1524254	FALSE	TRUE	FALSE	FALSE
1973	GCA_002704205.1	Rhodospirillaceae bacterium	1898112	FALSE	TRUE	FALSE	FALSE
1974	GCA_002695205.1	Microbacterium sp.	51671	FALSE	TRUE	FALSE	FALSE
1975	GCA_013282935.1	Marinobacterium sp. xm-d-579	2497734	FALSE	TRUE	FALSE	FALSE
1976	GCA_002726445.1	Cellvibrionales bacterium	2026722	FALSE	TRUE	FALSE	FALSE
1977	GCA_002698505.1	Synechococcus sp. NAT40	2024884	FALSE	TRUE	FALSE	FALSE
1978	GCA_003261095.1	Desulfobacter hydrogenophilus	2291	FALSE	TRUE	FALSE	FALSE
1979	GCA_002873615.1	Shewanella sp. 10N.286.51.B7	1880836	FALSE	TRUE	FALSE	FALSE
1980	GCA_015243575.1	Clostridiales bacterium	1898207	FALSE	TRUE	FALSE	FALSE
1981	GCA_001304415.1	Gemmatimonas sp. SG8_38_2	1703358	FALSE	TRUE	FALSE	FALSE
1982	GCA_002690865.1	Gammaproteobacteria bacterium	1913989	FALSE	TRUE	FALSE	FALSE
1983	GCA_002728795.1	Marinovum sp.	2024839	FALSE	TRUE	FALSE	FALSE
1984	GCA_002847505.1	Acidithiobacillus sp. SH	187490	FALSE	TRUE	FALSE	FALSE
1985	GCA_900111065.1	Myroides profundi	480520	FALSE	TRUE	FALSE	FALSE
1986	GCA_002718475.1	Candidatus Marinimicrobia bacterium	2026760	TRUE	FALSE	FALSE	FALSE
1987	GCA_002720895.1	Pelagibacteraceae bacterium	2026775	FALSE	TRUE	FALSE	FALSE
1988	GCA_002699555.1	Dehalococcoidia bacterium	2026734	FALSE	TRUE	FALSE	FALSE
1989	GCA_002722755.1	Proteobacteria bacterium	1977087	FALSE	TRUE	FALSE	FALSE
1990	GCA_002724745.1	Herbaspirillum sp.	1890675	FALSE	TRUE	FALSE	FALSE
1991	GCA_013388355.1	Flavobacterium sp. LPB0248	2614441	FALSE	TRUE	FALSE	FALSE
1992	GCA_000759875.1	Prochlorococcus marinus	190047	FALSE	TRUE	FALSE	FALSE
1993	GCA_002683135.1	Planctomycetota bacterium	2026780	FALSE	TRUE	FALSE	FALSE
1994	GCA_002683915.1	Marinobacter sp.	50741	FALSE	TRUE	FALSE	FALSE
1995	GCA_002720665.1	Gemmatimonadetes bacterium	2026742	FALSE	TRUE	FALSE	FALSE
1996	GCA_002705165.1	Planctomycetaceae bacterium	2026779	FALSE	TRUE	FALSE	FALSE
1997	GCA_002722885.1	Rhodospirillaceae bacterium	1898112	FALSE	TRUE	FALSE	FALSE
[truncated: 2,481 more rows]
