# Supplementary material for: Rational assembly of synthetic marine biofilm community with chitinase production
Source: Research Square preprint supplement (doi:10.21203/rs.3.rs-9419003/v1), 2026-06-04
Supplement: Supplementary file 2 [file a8fecc87dfc582e1fe2bc5b7.docx]

**Predicting optimal inhibitor pairs for individual member selection**

We aim to identify a set of selective plating conditions to isolate each of *M* total members. We used plate reader absorbance data from Biolog Phentotype Microarray inhibitor plates. Inhibitor measurements may be taken at single time points or multiple time points to capture growth at different stages.

We captured absorbance measurements at 650 nm and 750 nm for inhibitor plates. Accordingly, we define and as the absorbance values for member *m* and inhibitor *x* for sample number *k*, and *tk* is the time in hours at which sample *k* was measured. We subtracted 750 nm background measurements from the corresponding 650 nm absorbance measurements, and we used trapezoidal integration to calculate a cumulative value *Am,x* for each member *m* and inhibitor *x*:

Next, we normalize *Am,x* values to define *Bm,x* which ranges from 0 to 1:

Here, is the minimum of , and is an estimate of the maximum of . To avoid the influence of outliers, we define as the median of the 5 highest values of . We limit the highest value to 1.

Using these normalized cumulative values, we create a raw score *R*{*i*,*j*},*m* for each inhibitor pair {*x*=*i*,*x*=*j*} and each member *m*:

In essence, we are predicting inhibition of inhibitor pair {*i*,*j*} as the product of inhibition caused by each inhibitor independently. While the effect of combined inhibitors is often nonlinear experimentally, this estimate works well towards identifying the most promising combinations for experimental testing and combined dosage optimization.

These raw scores alone can guide identification of the best inhibitor pairs for selecting each member. However, for large community sizes or large numbers of inhibitor pairs, we go a step further towards aiding this identification process by calculating a ‘grade’ for each inhibitor combination and targeted member. Towards this end, for each targeted member *y* we wish to select for, we need to assess how well each inhibitor pair {*i*,*j*} inhibits all other members. We evaluate inhibition of non-targeted isolates relative to the degree of undesired inhibition of the target.  Otherwise, strong inhibition across all taxa (including our targeted one) could generate scores that aren’t too bad, especially for larger communities.  We define the *M* elements of a score vector as follows:

We then define the ideal score:

Finally, we calculate a “grade” for each inhibitor combination that ranges from 0 to 100, regardless of the community size, where 0 is the worst and 100 is perfect.  We first calculate penalties as the Euclidean distance between the actual and ideal score vectors, normalize based on *M*, and cap the penalty at 1:

We then convert the penalty to a grade:

These grades simplify identification of best options for the next experimental steps. In the event that no options are appealing or that none are successful in downstream experiments, another inhibitor screen may be run to acquire better pairs.

**Note:**

The method can be extended to accommodate custom screens in multiwell plates or to plate images, e.g., quantifications of Biolog or tetrazolium dye reduction for each sample.
