# Supplementary material for: Rational assembly of synthetic marine biofilm community with chitinase production
Source: Research Square preprint supplement (doi:10.21203/rs.3.rs-9419003/v1), 2026-06-04
Supplement: Supplementary file 3 [file 5c1db01bc685377c833f3ca0.xlsx]

## Sheet: species_found_traits_2023
Supplementary Table 5: A list of all genome assembly used for trait search
Assembly_id	n_Proteins	Proteins_found	ranking_protsys	interactions	trait_synergy	ranking_traits	taxon	species
GCA_002237595.1	16	['SRFAA|P27206', 'SRFAB|Q04747', 'HfsD|Q9A5L5', 'HfsF|Q9A5M1', 'HfsE|Q9A5M2', 'HfsG|Q9A5M0', 'HfsH|Q9A5L9', 'GalL|C0HLX7', 'sdrC|A0A6A8FED6', 'SRFAC|Q08787', 'yfiB|Q9I4L6', 'sipW|P54506', 'ChiA|P32823', 'HfsC|Q9A5L8', 'HfsA|Q9A5L6', 'SRFAD|Q08788']	5	srf_hfs_chia_gal_sdrc	drag-reducing_adhesion_chitinase-production_colonization-resistance	4	2021862	Labrenzia sp. VG12
GCA_011009015.1	22	['SRFAC|Q08787', 'yfiR|Q9I4L4', 'HfsH|Q9A5L9', 'sdrC|A0A6A8FED6', 'HfsG|Q9A5M0', 'HfsE|Q9A5M2', 'SRFAD|Q08788', 'OmpU|P0C6Q6', 'HfsC|Q9A5L8', 'SRFAB|Q04747', 'GbpA|C3LW75', 'Foo1|A1X158', 'yfiB|Q9I4L6', 'SRFAA|P27206', 'HfsA|Q9A5L6', 'ompA|A0A3B6XXR4', 'HfsD|Q9A5L5', 'sipW|P54506', 'ChiA|P32823', 'GalL|C0HLX7', 'HfsF|Q9A5M1', 'ompW|A0A0F4PBB9']	8	srf_hfs_foo_chia_gal_ompu_sdrc_gbpa	drag-reducing_adhesion_chitinase-production_colonization-resistance	4	2683272	Spartinivicinus ruber
GCA_002876085.1	28	['SRFAB|Q04747', 'CHPC|Q9AD93', 'ompA|A0A3B6XXR4', 'CHPE|Q9X9Z2', 'HfaB|P27343', 'SRFAA|P27206', 'OmpU|P0C6Q6', 'tpbB|A0A0H2Z7X0', 'ompW|A0A0F4PBB9', 'CHPG|Q9KYH3', 'CHPA|Q8CJY7', 'HfsD|Q9A5L5', 'HfsF|Q9A5M1', 'HfsG|Q9A5M0', 'HfsH|Q9A5L9', 'SRFAC|Q08787', 'yfiB|Q9I4L6', 'CHPF|Q9KYG7', 'CHPH|Q9AD92', 'sipW|P54506', 'ChiA|P32823', 'HfsC|Q9A5L8', 'yfiR|Q9I4L4', 'HfsA|Q9A5L6', 'CHPB|Q9X7U2', 'CHPD|Q9…	7	srf_hfacces_chp_chia_yfi_ompu_gbpa	drag-reducing_adhesion_chitinase-production	3	136468	Vibrio lentus
GCA_002877235.1	24	['CHPC|Q9AD93', 'ompA|A0A3B6XXR4', 'CHPE|Q9X9Z2', 'HfaB|P27343', 'OmpU|P0C6Q6', 'tpbB|A0A0H2Z7X0', 'ompW|A0A0F4PBB9', 'CHPG|Q9KYH3', 'CHPA|Q8CJY7', 'HfsD|Q9A5L5', 'HfsG|Q9A5M0', 'HfsH|Q9A5L9', 'yfiB|Q9I4L6', 'CHPF|Q9KYG7', 'CHPH|Q9AD92', 'sipW|P54506', 'ChiA|P32823', 'HfsC|Q9A5L8', 'yfiR|Q9I4L4', 'HfsA|Q9A5L6', 'CHPB|Q9X7U2', 'CHPD|Q9L1J9', 'GbpA|C3LW75', 'SRFAD|Q08788']	6	hfacces_chp_chia_yfi_ompu_gbpa	adhesion_drag-reducing_chitinase-production	3	136468	Vibrio lentus
GCA_002873075.1	24	['CHPC|Q9AD93', 'ompA|A0A3B6XXR4', 'CHPE|Q9X9Z2', 'HfaB|P27343', 'OmpU|P0C6Q6', 'tpbB|A0A0H2Z7X0', 'ompW|A0A0F4PBB9', 'CHPG|Q9KYH3', 'CHPA|Q8CJY7', 'HfsD|Q9A5L5', 'HfsG|Q9A5M0', 'HfsH|Q9A5L9', 'yfiB|Q9I4L6', 'CHPF|Q9KYG7', 'CHPH|Q9AD92', 'sipW|P54506', 'ChiA|P32823', 'HfsC|Q9A5L8', 'yfiR|Q9I4L4', 'HfsA|Q9A5L6', 'CHPB|Q9X7U2', 'CHPD|Q9L1J9', 'GbpA|C3LW75', 'SRFAD|Q08788']	6	hfacces_chp_chia_yfi_ompu_gbpa	adhesion_drag-reducing_chitinase-production	3	136468	Vibrio lentus
GCA_001705665.1	16	['SRFAA|P27206', 'SRFAB|Q04747', 'HfsD|Q9A5L5', 'OmpU|P0C6Q6', 'HfsF|Q9A5M1', 'HfsG|Q9A5M0', 'HfsH|Q9A5L9', 'sdrC|A0A6A8FED6', 'SRFAC|Q08787', 'yfiB|Q9I4L6', 'sipW|P54506', 'RbmC|A0A2S1ZSI6', 'ChiA|P32823', 'HfsA|Q9A5L6', 'Bap1|Q9KQW0', 'SRFAD|Q08788']	6	srf_chia_ompu_sdrc_bap1_rbmc	drag-reducing_chitinase-production_adhesion	3	1889770	Thioclava sp. SK-1
GCA_000238315.4	23	['SRFAB|Q04747', 'Foo1|A1X158', 'ompA|A0A3B6XXR4', 'HfaB|P27343', 'SRFAA|P27206', 'OmpU|P0C6Q6', 'tpbB|A0A0H2Z7X0', 'ompW|A0A0F4PBB9', 'Bap1|Q9KQW0', 'pilF|A0A290TXQ9', 'HfsD|Q9A5L5', 'HfsF|Q9A5M1', 'HfsG|Q9A5M0', 'HfsH|Q9A5L9', 'SRFAC|Q08787', 'yfiB|Q9I4L6', 'sipW|P54506', 'ChiA|P32823', 'yfiR|Q9I4L4', 'HfsA|Q9A5L6', 'sdrC|A0A6A8FED6', 'GbpA|C3LW75', 'SRFAD|Q08788']	10	srf_hfacces_foo_chia_omp_yfi_ompu_sdrc_bap1_gbpa	drag-reducing_adhesion_chitinase-production	3	1279016	Pseudoalteromonas piscicida
GCA_002694315.1	20	['SRFAB|Q04747', 'Foo1|A1X158', 'ompA|A0A3B6XXR4', 'SRFAA|P27206', 'OmpU|P0C6Q6', 'RbmC|A0A2S1ZSI6', 'Bap1|Q9KQW0', 'HfsD|Q9A5L5', 'HfsG|Q9A5M0', 'HfsE|Q9A5M2', 'HfsH|Q9A5L9', 'SRFAC|Q08787', 'yfiB|Q9I4L6', 'sipW|P54506', 'ChiA|P32823', 'HfsC|Q9A5L8', 'yfiR|Q9I4L4', 'HfsA|Q9A5L6', 'sdrC|A0A6A8FED6', 'SRFAD|Q08788']	7	srf_foo_chia_ompu_sdrc_bap1_rbmc	drag-reducing_adhesion_chitinase-production	3	2024860	Spongiibacter sp.
GCA_002718075.1	18	['SRFAA|P27206', 'SRFAB|Q04747', 'HfsD|Q9A5L5', 'OmpU|P0C6Q6', 'HfsF|Q9A5M1', 'HfsE|Q9A5M2', 'HfsG|Q9A5M0', 'tpbB|A0A0H2Z7X0', 'ompA|A0A3B6XXR4', 'SRFAC|Q08787', 'yfiB|Q9I4L6', 'ompW|A0A0F4PBB9', 'sipW|P54506', 'ChiA|P32823', 'HfsC|Q9A5L8', 'yfiR|Q9I4L4', 'HfsA|Q9A5L6', 'SRFAD|Q08788']	4	srf_chia_yfi_ompu	drag-reducing_chitinase-production_adhesion	3	1891229	Pseudomonadales bacterium
GCA_002874305.1	22	['SRFAB|Q04747', 'ompA|A0A3B6XXR4', 'HfaB|P27343', 'SRFAA|P27206', 'OmpU|P0C6Q6', 'tpbB|A0A0H2Z7X0', 'ompW|A0A0F4PBB9', 'RbmC|A0A2S1ZSI6', 'Bap1|Q9KQW0', 'HfsD|Q9A5L5', 'HfsG|Q9A5M0', 'HfsE|Q9A5M2', 'HfsH|Q9A5L9', 'SRFAC|Q08787', 'yfiB|Q9I4L6', 'sipW|P54506', 'ChiA|P32823', 'HfsC|Q9A5L8', 'yfiR|Q9I4L4', 'HfsA|Q9A5L6', 'GbpA|C3LW75', 'SRFAD|Q08788']	8	srf_hfacces_chia_yfi_ompu_bap1_rbmc_gbpa	drag-reducing_adhesion_chitinase-production	3	136468	Vibrio lentus
GCA_002708905.1	19	['SRFAB|Q04747', 'ompA|A0A3B6XXR4', 'SRFAA|P27206', 'OmpU|P0C6Q6', 'tpbB|A0A0H2Z7X0', 'ompW|A0A0F4PBB9', 'HfsD|Q9A5L5', 'HfsG|Q9A5M0', 'HfsE|Q9A5M2', 'HfsH|Q9A5L9', 'SRFAC|Q08787', 'yfiB|Q9I4L6', 'sipW|P54506', 'ChiA|P32823', 'HfsC|Q9A5L8', 'yfiR|Q9I4L4', 'HfsA|Q9A5L6', 'sdrC|A0A6A8FED6', 'SRFAD|Q08788']	5	srf_chia_yfi_ompu_sdrc	drag-reducing_chitinase-production_adhesion	3	1891229	Pseudomonadales bacterium
GCA_000473895.1	15	['SRFAA|P27206', 'SRFAB|Q04747', 'HfsD|Q9A5L5', 'HfsF|Q9A5M1', 'HfsG|Q9A5M0', 'HfsH|Q9A5L9', 'SRFAC|Q08787', 'sipW|P54506', 'RbmC|A0A2S1ZSI6', 'ChiA|P32823', 'HfsC|Q9A5L8', 'HfaB|P27343', 'HfsA|Q9A5L6', 'Bap1|Q9KQW0', 'SRFAD|Q08788']	5	srf_hfacces_chia_bap1_rbmc	drag-reducing_adhesion_chitinase-production	3	582515	Rubidibacter lacunae
GCA_002718735.1	14	['SRFAA|P27206', 'SRFAB|Q04747', 'HfsD|Q9A5L5', 'Foo1|A1X158', 'HfsG|Q9A5M0', 'HfsE|Q9A5M2', 'OmpU|P0C6Q6', 'SRFAC|Q08787', 'yfiB|Q9I4L6', 'ChiA|P32823', 'HfsC|Q9A5L8', 'HfaB|P27343', 'HfsA|Q9A5L6', 'SRFAD|Q08788']	5	srf_hfacces_foo_chia_ompu	drag-reducing_adhesion_chitinase-production	3	2026745	Halobacteriovoraceae bacterium
GCA_002709295.1	16	['SRFAA|P27206', 'SRFAB|Q04747', 'HfsD|Q9A5L5', 'HfsF|Q9A5M1', 'HfsG|Q9A5M0', 'HfsH|Q9A5L9', 'ompA|A0A3B6XXR4', 'SRFAC|Q08787', 'yfiB|Q9I4L6', 'GbpA|C3LW75', 'sipW|P54506', 'ChiA|P32823', 'HfsC|Q9A5L8', 'HfaB|P27343', 'HfsA|Q9A5L6', 'SRFAD|Q08788']	4	srf_hfacces_chia_gbpa	drag-reducing_adhesion_chitinase-production	3	2026778	Phycisphaerae bacterium
GCA_002690755.1	14	['SRFAA|P27206', 'SRFAB|Q04747', 'HfsD|Q9A5L5', 'HfsF|Q9A5M1', 'HfsG|Q9A5M0', 'HfsH|Q9A5L9', 'SRFAC|Q08787', 'yfiB|Q9I4L6', 'GbpA|C3LW75', 'sipW|P54506', 'ChiA|P32823', 'HfsC|Q9A5L8', 'HfaB|P27343', 'SRFAD|Q08788']	4	srf_hfacces_chia_gbpa	drag-reducing_adhesion_chitinase-production	3	2026778	Phycisphaerae bacterium
GCA_001999225.1	23	['SRFAB|Q04747', 'ompA|A0A3B6XXR4', 'HfaB|P27343', 'SRFAA|P27206', 'OmpU|P0C6Q6', 'tpbB|A0A0H2Z7X0', 'ompW|A0A0F4PBB9', 'RbmC|A0A2S1ZSI6', 'Bap1|Q9KQW0', 'HfsD|Q9A5L5', 'HfsF|Q9A5M1', 'HfsE|Q9A5M2', 'HfsG|Q9A5M0', 'HfsH|Q9A5L9', 'SRFAC|Q08787', 'yfiB|Q9I4L6', 'sipW|P54506', 'ChiA|P32823', 'HfsC|Q9A5L8', 'HfsA|Q9A5L6', 'sdrC|A0A6A8FED6', 'GbpA|C3LW75', 'SRFAD|Q08788']	9	srf_hfs_hfacces_chia_ompu_sdrc_bap1_rbmc_gbpa	drag-reducing_adhesion_chitinase-production	3	247523	Pseudoalteromonas aliena
GCA_014763045.1	14	['SRFAA|P27206', 'SRFAB|Q04747', 'HfsD|Q9A5L5', 'OmpU|P0C6Q6', 'HfsF|Q9A5M1', 'bslB|P39632', 'HfsG|Q9A5M0', 'HfsH|Q9A5L9', 'SRFAD|Q08788', 'yfiB|Q9I4L6', 'sipW|P54506', 'ChiA|P32823', 'HfsA|Q9A5L6', 'bslA|P71014']	3	bsl_chia_ompu	drag-reducing_chitinase-production_adhesion	3	2766981	Sulfitobacter aestuariivivens
GCA_001635565.1	18	['SRFAA|P27206', 'SRFAB|Q04747', 'HfsD|Q9A5L5', 'OmpU|P0C6Q6', 'HfsF|Q9A5M1', 'HfsE|Q9A5M2', 'HfsG|Q9A5M0', 'sdrC|A0A6A8FED6', 'ompA|A0A3B6XXR4', 'SRFAC|Q08787', 'yfiB|Q9I4L6', 'ompW|A0A0F4PBB9', 'sipW|P54506', 'ChiA|P32823', 'HfsC|Q9A5L8', 'HfaB|P27343', 'HfsA|Q9A5L6', 'SRFAD|Q08788']	5	srf_hfacces_chia_ompu_sdrc	drag-reducing_adhesion_chitinase-production	3	1822220	Alcanivorax sp. HI0011
GCA_014163635.1	22	['SRFAB|Q04747', 'Foo1|A1X158', 'ompA|A0A3B6XXR4', 'HfaB|P27343', 'SRFAA|P27206', 'OmpU|P0C6Q6', 'ompW|A0A0F4PBB9', 'pilF|A0A290TXQ9', 'HfsD|Q9A5L5', 'HfsF|Q9A5M1', 'HfsG|Q9A5M0', 'HfsH|Q9A5L9', 'SRFAC|Q08787', 'yfiB|Q9I4L6', 'sipW|P54506', 'ChiA|P32823', 'HfsC|Q9A5L8', 'yfiR|Q9I4L4', 'HfsA|Q9A5L6', 'sdrC|A0A6A8FED6', 'GbpA|C3LW75', 'SRFAD|Q08788']	8	srf_hfacces_foo_chia_omp_ompu_sdrc_gbpa	drag-reducing_adhesion_chitinase-production	3	2760933	Pseudoalteromonas sp. SR44-8
GCA_900104145.1	21	['SRFAB|Q04747', 'HfaB|P27343', 'SRFAA|P27206', 'OmpU|P0C6Q6', 'tpbB|A0A0H2Z7X0', 'ompW|A0A0F4PBB9', 'RbmC|A0A2S1ZSI6', 'Bap1|Q9KQW0', 'HfsD|Q9A5L5', 'HfsF|Q9A5M1', 'HfsE|Q9A5M2', 'HfsG|Q9A5M0', 'HfsH|Q9A5L9', 'SRFAC|Q08787', 'yfiB|Q9I4L6', 'sipW|P54506', 'ChiA|P32823', 'HfsC|Q9A5L8', 'HfsA|Q9A5L6', 'sdrC|A0A6A8FED6', 'SRFAD|Q08788']	8	srf_hfs_hfacces_chia_ompu_sdrc_bap1_rbmc	drag-reducing_adhesion_chitinase-production	3	1798213	Pseudovibrio sp. Tun.PSC04-5.I4
GCA_002875825.1	30	['SRFAB|Q04747', 'CHPC|Q9AD93', 'ompA|A0A3B6XXR4', 'CHPE|Q9X9Z2', 'HfaB|P27343', 'SRFAA|P27206', 'OmpU|P0C6Q6', 'tpbB|A0A0H2Z7X0', 'ompW|A0A0F4PBB9', 'CHPG|Q9KYH3', 'RbmC|A0A2S1ZSI6', 'Bap1|Q9KQW0', 'CHPA|Q8CJY7', 'HfsD|Q9A5L5', 'HfsG|Q9A5M0', 'HfsE|Q9A5M2', 'HfsH|Q9A5L9', 'SRFAC|Q08787', 'yfiB|Q9I4L6', 'CHPF|Q9KYG7', 'CHPH|Q9AD92', 'sipW|P54506', 'ChiA|P32823', 'HfsC|Q9A5L8', 'yfiR|Q9I4L4', 'Hfs…	9	srf_hfacces_chp_chia_yfi_ompu_bap1_rbmc_gbpa	drag-reducing_adhesion_chitinase-production	3	136468	Vibrio lentus
GCA_000455705.1	22	['SRFAB|Q04747', 'ompA|A0A3B6XXR4', 'HfaB|P27343', 'SRFAA|P27206', 'OmpU|P0C6Q6', 'tpbB|A0A0H2Z7X0', 'ompW|A0A0F4PBB9', 'HfsD|Q9A5L5', 'HfsF|Q9A5M1', 'HfsE|Q9A5M2', 'HfsG|Q9A5M0', 'HfsH|Q9A5L9', 'SRFAC|Q08787', 'yfiB|Q9I4L6', 'sipW|P54506', 'ChiA|P32823', 'HfsC|Q9A5L8', 'yfiR|Q9I4L4', 'HfsA|Q9A5L6', 'sdrC|A0A6A8FED6', 'GbpA|C3LW75', 'SRFAD|Q08788']	8	srf_hfs_hfacces_chia_yfi_ompu_sdrc_gbpa	drag-reducing_adhesion_chitinase-production	3	1333855	Pseudomonas aeruginosa
GCA_002719755.1	18	['SRFAA|P27206', 'SRFAB|Q04747', 'HfsD|Q9A5L5', 'Foo1|A1X158', 'HfsF|Q9A5M1', 'HfsE|Q9A5M2', 'HfsG|Q9A5M0', 'OmpU|P0C6Q6', 'tpbB|A0A0H2Z7X0', 'ompA|A0A3B6XXR4', 'SRFAC|Q08787', 'yfiB|Q9I4L6', 'ompW|A0A0F4PBB9', 'sipW|P54506', 'ChiA|P32823', 'HfsC|Q9A5L8', 'HfsA|Q9A5L6', 'SRFAD|Q08788']	4	srf_foo_chia_ompu	drag-reducing_adhesion_chitinase-production	3	2024860	Spongiibacter sp.
GCA_009649685.1	19	['SRFAB|Q04747', 'Foo1|A1X158', 'HfaB|P27343', 'SRFAA|P27206', 'RbmC|A0A2S1ZSI6', 'Bap1|Q9KQW0', 'HfsD|Q9A5L5', 'HfsF|Q9A5M1', 'HfsE|Q9A5M2', 'HfsG|Q9A5M0', 'HfsH|Q9A5L9', 'SRFAC|Q08787', 'yfiB|Q9I4L6', 'sipW|P54506', 'ChiA|P32823', 'HfsC|Q9A5L8', 'HfsA|Q9A5L6', 'sdrC|A0A6A8FED6', 'SRFAD|Q08788']	8	srf_hfs_hfacces_foo_chia_sdrc_bap1_rbmc	drag-reducing_adhesion_chitinase-production	3	2664451	Kriegella sp. EG-1
GCA_900163965.1	19	['SRFAB|Q04747', 'ompA|A0A3B6XXR4', 'HfaB|P27343', 'SRFAA|P27206', 'OmpU|P0C6Q6', 'tpbB|A0A0H2Z7X0', 'ompW|A0A0F4PBB9', 'HfsD|Q9A5L5', 'HfsF|Q9A5M1', 'HfsE|Q9A5M2', 'HfsG|Q9A5M0', 'HfsH|Q9A5L9', 'SRFAC|Q08787', 'yfiB|Q9I4L6', 'sipW|P54506', 'ChiA|P32823', 'HfsC|Q9A5L8', 'HfsA|Q9A5L6', 'SRFAD|Q08788']	5	srf_hfs_hfacces_chia_ompu	drag-reducing_adhesion_chitinase-production	3	1123498	Vibrio ruber
GCA_002716305.1	17	['SRFAA|P27206', 'SRFAB|Q04747', 'HfsD|Q9A5L5', 'Foo1|A1X158', 'HfsF|Q9A5M1', 'HfsE|Q9A5M2', 'HfsG|Q9A5M0', 'HfsH|Q9A5L9', 'SRFAC|Q08787', 'yfiB|Q9I4L6', 'RbmC|A0A2S1ZSI6', 'ChiA|P32823', 'HfsC|Q9A5L8', 'HfaB|P27343', 'HfsA|Q9A5L6', 'Bap1|Q9KQW0', 'SRFAD|Q08788']	7	srf_hfs_hfacces_foo_chia_bap1_rbmc	drag-reducing_adhesion_chitinase-production	3	2024850	Peredibacter sp.
GCA_002688475.1	17	['HfsD|Q9A5L5', 'Foo1|A1X158', 'HfsG|Q9A5M0', 'HfsH|Q9A5L9', 'GalL|C0HLX7', 'OmpU|P0C6Q6', 'sdrC|A0A6A8FED6', 'ompA|A0A3B6XXR4', 'yfiB|Q9I4L6', 'ompW|A0A0F4PBB9', 'sipW|P54506', 'RbmC|A0A2S1ZSI6', 'ChiA|P32823', 'HfaB|P27343', 'HfsA|Q9A5L6', 'Bap1|Q9KQW0', 'SRFAD|Q08788']	8	hfacces_foo_chia_gal_ompu_sdrc_bap1_rbmc	adhesion_chitinase-production_colonization-resistance	3	1898113	Idiomarinaceae bacterium
GCA_002876415.1	29	['SRFAB|Q04747', 'CHPC|Q9AD93', 'ompA|A0A3B6XXR4', 'CHPE|Q9X9Z2', 'HfaB|P27343', 'SRFAA|P27206', 'OmpU|P0C6Q6', 'tpbB|A0A0H2Z7X0', 'ompW|A0A0F4PBB9', 'CHPG|Q9KYH3', 'RbmC|A0A2S1ZSI6', 'Bap1|Q9KQW0', 'CHPA|Q8CJY7', 'HfsD|Q9A5L5', 'HfsG|Q9A5M0', 'HfsH|Q9A5L9', 'SRFAC|Q08787', 'yfiB|Q9I4L6', 'CHPF|Q9KYG7', 'CHPH|Q9AD92', 'sipW|P54506', 'ChiA|P32823', 'HfsC|Q9A5L8', 'yfiR|Q9I4L4', 'HfsA|Q9A5L6', 'CHP…	9	srf_hfacces_chp_chia_yfi_ompu_bap1_rbmc_gbpa	drag-reducing_adhesion_chitinase-production	3	136468	Vibrio lentus
GCA_002712005.1	15	['SRFAA|P27206', 'SRFAB|Q04747', 'HfsD|Q9A5L5', 'HfsF|Q9A5M1', 'HfsE|Q9A5M2', 'HfsG|Q9A5M0', 'HfsH|Q9A5L9', 'SRFAC|Q08787', 'yfiB|Q9I4L6', 'ompW|A0A0F4PBB9', 'sipW|P54506', 'ChiA|P32823', 'HfsC|Q9A5L8', 'HfaB|P27343', 'SRFAD|Q08788']	3	srf_hfacces_chia	drag-reducing_adhesion_chitinase-production	3	2026745	Halobacteriovoraceae bacterium
GCA_011806535.1	21	['SRFAB|Q04747', 'Foo1|A1X158', 'ompA|A0A3B6XXR4', 'HfaB|P27343', 'SRFAA|P27206', 'OmpU|P0C6Q6', 'tpbB|A0A0H2Z7X0', 'ompW|A0A0F4PBB9', 'HfsD|Q9A5L5', 'HfsG|Q9A5M0', 'HfsE|Q9A5M2', 'HfsH|Q9A5L9', 'SRFAC|Q08787', 'yfiB|Q9I4L6', 'sipW|P54506', 'ChiA|P32823', 'HfsC|Q9A5L8', 'yfiR|Q9I4L4', 'HfsA|Q9A5L6', 'GbpA|C3LW75', 'SRFAD|Q08788']	7	srf_hfacces_foo_chia_yfi_ompu_gbpa	drag-reducing_adhesion_chitinase-production	3	680	Vibrio campbellii
GCA_014163985.1	22	['SRFAB|Q04747', 'Foo1|A1X158', 'ompA|A0A3B6XXR4', 'HfaB|P27343', 'SRFAA|P27206', 'OmpU|P0C6Q6', 'ompW|A0A0F4PBB9', 'pilF|A0A290TXQ9', 'HfsD|Q9A5L5', 'HfsF|Q9A5M1', 'HfsE|Q9A5M2', 'HfsG|Q9A5M0', 'HfsH|Q9A5L9', 'SRFAC|Q08787', 'yfiB|Q9I4L6', 'sipW|P54506', 'ChiA|P32823', 'yfiR|Q9I4L4', 'HfsA|Q9A5L6', 'sdrC|A0A6A8FED6', 'GbpA|C3LW75', 'SRFAD|Q08788']	8	srf_hfacces_foo_chia_omp_ompu_sdrc_gbpa	drag-reducing_adhesion_chitinase-production	3	2760950	Pseudoalteromonas sp. SR41-4
GCA_001625575.1	19	['SRFAB|Q04747', 'Foo1|A1X158', 'ompA|A0A3B6XXR4', 'HfaB|P27343', 'SRFAA|P27206', 'OmpU|P0C6Q6', 'ompW|A0A0F4PBB9', 'HfsD|Q9A5L5', 'HfsG|Q9A5M0', 'HfsH|Q9A5L9', 'SRFAC|Q08787', 'yfiB|Q9I4L6', 'sipW|P54506', 'ChiA|P32823', 'HfsC|Q9A5L8', 'yfiR|Q9I4L4', 'HfsA|Q9A5L6', 'GbpA|C3LW75', 'SRFAD|Q08788']	6	srf_hfacces_foo_chia_ompu_gbpa	drag-reducing_adhesion_chitinase-production	3	1365255	Pseudoalteromonas luteoviolacea
GCA_002874235.1	26	['SRFAB|Q04747', 'CHPC|Q9AD93', 'ompA|A0A3B6XXR4', 'CHPE|Q9X9Z2', 'HfaB|P27343', 'SRFAA|P27206', 'OmpU|P0C6Q6', 'tpbB|A0A0H2Z7X0', 'ompW|A0A0F4PBB9', 'CHPG|Q9KYH3', 'CHPA|Q8CJY7', 'HfsD|Q9A5L5', 'HfsG|Q9A5M0', 'HfsH|Q9A5L9', 'SRFAC|Q08787', 'yfiB|Q9I4L6', 'CHPF|Q9KYG7', 'CHPH|Q9AD92', 'sipW|P54506', 'ChiA|P32823', 'HfsC|Q9A5L8', 'HfsA|Q9A5L6', 'CHPB|Q9X7U2', 'CHPD|Q9L1J9', 'GbpA|C3LW75', 'SRFAD|Q…	6	srf_hfacces_chp_chia_ompu_gbpa	drag-reducing_adhesion_chitinase-production	3	136468	Vibrio lentus
GCA_002731975.1	14	['SRFAA|P27206', 'SRFAB|Q04747', 'HfsD|Q9A5L5', 'HfsF|Q9A5M1', 'HfsG|Q9A5M0', 'tpbB|A0A0H2Z7X0', 'SRFAC|Q08787', 'yfiB|Q9I4L6', 'sipW|P54506', 'RbmC|A0A2S1ZSI6', 'ChiA|P32823', 'HfsA|Q9A5L6', 'Bap1|Q9KQW0', 'SRFAD|Q08788']	4	srf_chia_bap1_rbmc	drag-reducing_chitinase-production_adhesion	3	2026727	Coxiellaceae bacterium
GCA_001625715.1	21	['SRFAB|Q04747', 'Foo1|A1X158', 'ompA|A0A3B6XXR4', 'HfaB|P27343', 'SRFAA|P27206', 'OmpU|P0C6Q6', 'ompW|A0A0F4PBB9', 'HfsD|Q9A5L5', 'HfsF|Q9A5M1', 'HfsG|Q9A5M0', 'HfsH|Q9A5L9', 'SRFAC|Q08787', 'yfiB|Q9I4L6', 'sipW|P54506', 'ChiA|P32823', 'HfsC|Q9A5L8', 'yfiR|Q9I4L4', 'HfsA|Q9A5L6', 'sdrC|A0A6A8FED6', 'GbpA|C3LW75', 'SRFAD|Q08788']	7	srf_hfacces_foo_chia_ompu_sdrc_gbpa	drag-reducing_adhesion_chitinase-production	3	1365256	Pseudoalteromonas luteoviolacea
GCA_002872615.1	25	['CHPC|Q9AD93', 'ompA|A0A3B6XXR4', 'CHPE|Q9X9Z2', 'HfaB|P27343', 'OmpU|P0C6Q6', 'tpbB|A0A0H2Z7X0', 'ompW|A0A0F4PBB9', 'CHPG|Q9KYH3', 'CHPA|Q8CJY7', 'HfsD|Q9A5L5', 'HfsF|Q9A5M1', 'HfsG|Q9A5M0', 'HfsH|Q9A5L9', 'yfiB|Q9I4L6', 'CHPF|Q9KYG7', 'CHPH|Q9AD92', 'sipW|P54506', 'ChiA|P32823', 'HfsC|Q9A5L8', 'yfiR|Q9I4L4', 'HfsA|Q9A5L6', 'CHPB|Q9X7U2', 'CHPD|Q9L1J9', 'GbpA|C3LW75', 'SRFAD|Q08788']	6	hfacces_chp_chia_yfi_ompu_gbpa	adhesion_drag-reducing_chitinase-production	3	136468	Vibrio lentus
GCA_001974565.1	21	['SRFAB|Q04747', 'ompA|A0A3B6XXR4', 'HfaB|P27343', 'SRFAA|P27206', 'OmpU|P0C6Q6', 'tpbB|A0A0H2Z7X0', 'ompW|A0A0F4PBB9', 'RbmC|A0A2S1ZSI6', 'Bap1|Q9KQW0', 'HfsD|Q9A5L5', 'HfsG|Q9A5M0', 'HfsH|Q9A5L9', 'SRFAC|Q08787', 'yfiB|Q9I4L6', 'sipW|P54506', 'ChiA|P32823', 'HfsC|Q9A5L8', 'yfiR|Q9I4L4', 'HfsA|Q9A5L6', 'GbpA|C3LW75', 'SRFAD|Q08788']	8	srf_hfacces_chia_yfi_ompu_bap1_rbmc_gbpa	drag-reducing_adhesion_chitinase-production	3	1903178	Vibrio sp. 10N.222.47.A9
GCA_000334195.1	20	['SRFAB|Q04747', 'ompA|A0A3B6XXR4', 'HfaB|P27343', 'SRFAA|P27206', 'OmpU|P0C6Q6', 'tpbB|A0A0H2Z7X0', 'ompW|A0A0F4PBB9', 'HfsD|Q9A5L5', 'HfsF|Q9A5M1', 'HfsE|Q9A5M2', 'HfsG|Q9A5M0', 'HfsH|Q9A5L9', 'SRFAC|Q08787', 'yfiB|Q9I4L6', 'sipW|P54506', 'ChiA|P32823', 'HfsC|Q9A5L8', 'HfsA|Q9A5L6', 'GbpA|C3LW75', 'SRFAD|Q08788']	6	srf_hfs_hfacces_chia_ompu_gbpa	drag-reducing_adhesion_chitinase-production	3	1224742	Vibrio campbellii
GCA_009735315.1	19	['CHPC|Q9AD93', 'CHPE|Q9X9Z2', 'CHPG|Q9KYH3', 'CHPA|Q8CJY7', 'HfsD|Q9A5L5', 'HfsF|Q9A5M1', 'HfsE|Q9A5M2', 'HfsG|Q9A5M0', 'HfsH|Q9A5L9', 'tasA|P54507', 'CHPF|Q9KYG7', 'CHPH|Q9AD92', 'sipW|P54506', 'ChiA|P32823', 'HfsC|Q9A5L8', 'HfsA|Q9A5L6', 'CHPB|Q9X7U2', 'CHPD|Q9L1J9', 'SRFAD|Q08788']	4	hfs_chp_chia_tapA	adhesion_drag-reducing_chitinase-production	3	1038857	Kocuria sediminis
GCA_002686755.1	13	['HfsD|Q9A5L5', 'OmpU|P0C6Q6', 'HfsF|Q9A5M1', 'HfsE|Q9A5M2', 'HfsG|Q9A5M0', 'GalL|C0HLX7', 'sdrC|A0A6A8FED6', 'yfiB|Q9I4L6', 'sipW|P54506', 'ChiA|P32823', 'HfsC|Q9A5L8', 'HfsA|Q9A5L6', 'SRFAD|Q08788']	4	chia_gal_ompu_sdrc	chitinase-production_colonization-resistance_adhesion	3	2026801	Verrucomicrobiales bacterium
GCA_002686625.1	18	['SRFAA|P27206', 'SRFAB|Q04747', 'HfsD|Q9A5L5', 'OmpU|P0C6Q6', 'HfsF|Q9A5M1', 'bslB|P39632', 'HfsH|Q9A5L9', 'sdrC|A0A6A8FED6', 'SRFAC|Q08787', 'yfiB|Q9I4L6', 'sipW|P54506', 'RbmC|A0A2S1ZSI6', 'ChiA|P32823', 'yfiR|Q9I4L4', 'HfaB|P27343', 'HfsA|Q9A5L6', 'Bap1|Q9KQW0', 'bslA|P71014']	7	bsl_hfacces_chia_ompu_sdrc_bap1_rbmc	drag-reducing_adhesion_chitinase-production	3	2026781	Candidatus Poribacteria bacterium
GCA_002877725.1	24	['CHPC|Q9AD93', 'ompA|A0A3B6XXR4', 'CHPE|Q9X9Z2', 'HfaB|P27343', 'OmpU|P0C6Q6', 'tpbB|A0A0H2Z7X0', 'ompW|A0A0F4PBB9', 'CHPG|Q9KYH3', 'CHPA|Q8CJY7', 'HfsD|Q9A5L5', 'HfsG|Q9A5M0', 'HfsH|Q9A5L9', 'yfiB|Q9I4L6', 'CHPF|Q9KYG7', 'CHPH|Q9AD92', 'sipW|P54506', 'ChiA|P32823', 'HfsC|Q9A5L8', 'yfiR|Q9I4L4', 'HfsA|Q9A5L6', 'CHPB|Q9X7U2', 'CHPD|Q9L1J9', 'GbpA|C3LW75', 'SRFAD|Q08788']	6	hfacces_chp_chia_yfi_ompu_gbpa	adhesion_drag-reducing_chitinase-production	3	136468	Vibrio lentus
GCA_002915595.1	17	['SRFAA|P27206', 'SRFAB|Q04747', 'HfsD|Q9A5L5', 'Foo1|A1X158', 'HfsF|Q9A5M1', 'HfsE|Q9A5M2', 'HfsG|Q9A5M0', 'OmpU|P0C6Q6', 'sdrC|A0A6A8FED6', 'ompA|A0A3B6XXR4', 'SRFAC|Q08787', 'yfiB|Q9I4L6', 'sipW|P54506', 'ChiA|P32823', 'HfsC|Q9A5L8', 'HfsA|Q9A5L6', 'SRFAD|Q08788']	5	srf_foo_chia_ompu_sdrc	drag-reducing_adhesion_chitinase-production	3	2067667	Marortus luteolus
GCA_014164125.1	22	['SRFAB|Q04747', 'Foo1|A1X158', 'ompA|A0A3B6XXR4', 'HfaB|P27343', 'SRFAA|P27206', 'OmpU|P0C6Q6', 'ompW|A0A0F4PBB9', 'pilF|A0A290TXQ9', 'HfsD|Q9A5L5', 'HfsF|Q9A5M1', 'HfsG|Q9A5M0', 'HfsH|Q9A5L9', 'SRFAC|Q08787', 'yfiB|Q9I4L6', 'sipW|P54506', 'ChiA|P32823', 'HfsC|Q9A5L8', 'yfiR|Q9I4L4', 'HfsA|Q9A5L6', 'sdrC|A0A6A8FED6', 'GbpA|C3LW75', 'SRFAD|Q08788']	8	srf_hfacces_foo_chia_omp_ompu_sdrc_gbpa	drag-reducing_adhesion_chitinase-production	3	2760958	Pseudoalteromonas sp. SG44-8
GCA_002717465.1	20	['SRFAB|Q04747', 'CHPC|Q9AD93', 'Foo1|A1X158', 'CHPE|Q9X9Z2', 'SRFAA|P27206', 'CHPG|Q9KYH3', 'pilF|A0A290TXQ9', 'CHPA|Q8CJY7', 'HfsD|Q9A5L5', 'HfsF|Q9A5M1', 'HfsG|Q9A5M0', 'HfsH|Q9A5L9', 'CHPF|Q9KYG7', 'CHPH|Q9AD92', 'sipW|P54506', 'ChiA|P32823', 'HfsC|Q9A5L8', 'CHPB|Q9X7U2', 'CHPD|Q9L1J9', 'SRFAD|Q08788']	3	chp_foo_chia	drag-reducing_adhesion_chitinase-production	3	2026724	Chloroflexi bacterium
GCA_002875785.1	29	['SRFAB|Q04747', 'CHPC|Q9AD93', 'ompA|A0A3B6XXR4', 'CHPE|Q9X9Z2', 'HfaB|P27343', 'SRFAA|P27206', 'OmpU|P0C6Q6', 'tpbB|A0A0H2Z7X0', 'ompW|A0A0F4PBB9', 'CHPG|Q9KYH3', 'RbmC|A0A2S1ZSI6', 'Bap1|Q9KQW0', 'CHPA|Q8CJY7', 'HfsD|Q9A5L5', 'HfsG|Q9A5M0', 'HfsH|Q9A5L9', 'SRFAC|Q08787', 'yfiB|Q9I4L6', 'CHPF|Q9KYG7', 'CHPH|Q9AD92', 'sipW|P54506', 'ChiA|P32823', 'HfsC|Q9A5L8', 'yfiR|Q9I4L4', 'HfsA|Q9A5L6', 'CHP…	9	srf_hfacces_chp_chia_yfi_ompu_bap1_rbmc_gbpa	drag-reducing_adhesion_chitinase-production	3	136468	Vibrio lentus
GCA_002876795.1	19	['SRFAB|Q04747', 'ompA|A0A3B6XXR4', 'HfaB|P27343', 'SRFAA|P27206', 'OmpU|P0C6Q6', 'tpbB|A0A0H2Z7X0', 'ompW|A0A0F4PBB9', 'HfsD|Q9A5L5', 'HfsG|Q9A5M0', 'HfsH|Q9A5L9', 'SRFAC|Q08787', 'yfiB|Q9I4L6', 'sipW|P54506', 'ChiA|P32823', 'HfsC|Q9A5L8', 'yfiR|Q9I4L4', 'HfsA|Q9A5L6', 'GbpA|C3LW75', 'SRFAD|Q08788']	6	srf_hfacces_chia_yfi_ompu_gbpa	drag-reducing_adhesion_chitinase-production	3	136468	Vibrio lentus
GCA_002874275.1	28	['SRFAB|Q04747', 'CHPC|Q9AD93', 'ompA|A0A3B6XXR4', 'CHPE|Q9X9Z2', 'HfaB|P27343', 'SRFAA|P27206', 'OmpU|P0C6Q6', 'tpbB|A0A0H2Z7X0', 'ompW|A0A0F4PBB9', 'CHPG|Q9KYH3', 'RbmC|A0A2S1ZSI6', 'Bap1|Q9KQW0', 'CHPA|Q8CJY7', 'HfsD|Q9A5L5', 'HfsG|Q9A5M0', 'HfsH|Q9A5L9', 'SRFAC|Q08787', 'yfiB|Q9I4L6', 'CHPF|Q9KYG7', 'CHPH|Q9AD92', 'sipW|P54506', 'ChiA|P32823', 'HfsC|Q9A5L8', 'HfsA|Q9A5L6', 'CHPB|Q9X7U2', 'CHP…	8	srf_hfacces_chp_chia_ompu_bap1_rbmc_gbpa	drag-reducing_adhesion_chitinase-production	3	136468	Vibrio lentus
GCA_002707495.1	16	['SRFAA|P27206', 'SRFAB|Q04747', 'HfsD|Q9A5L5', 'OmpU|P0C6Q6', 'HfsG|Q9A5M0', 'HfsE|Q9A5M2', 'HfsH|Q9A5L9', 'ompA|A0A3B6XXR4', 'SRFAC|Q08787', 'yfiB|Q9I4L6', 'sipW|P54506', 'ChiA|P32823', 'HfsC|Q9A5L8', 'HfaB|P27343', 'HfsA|Q9A5L6', 'SRFAD|Q08788']	4	srf_hfacces_chia_ompu	drag-reducing_adhesion_chitinase-production	3	2026745	Halobacteriovoraceae bacterium
GCA_001456255.1	20	['SRFAB|Q04747', 'ompA|A0A3B6XXR4', 'HfaB|P27343', 'SRFAA|P27206', 'OmpU|P0C6Q6', 'ompW|A0A0F4PBB9', 'RbmC|A0A2S1ZSI6', 'Bap1|Q9KQW0', 'HfsD|Q9A5L5', 'HfsF|Q9A5M1', 'HfsG|Q9A5M0', 'HfsH|Q9A5L9', 'SRFAC|Q08787', 'yfiB|Q9I4L6', 'sipW|P54506', 'ChiA|P32823', 'HfsC|Q9A5L8', 'HfsA|Q9A5L6', 'sdrC|A0A6A8FED6', 'SRFAD|Q08788']	7	srf_hfacces_chia_ompu_sdrc_bap1_rbmc	drag-reducing_adhesion_chitinase-production	3	1219067	Vibrio natriegens
GCA_002696215.1	19	['SRFAB|Q04747', 'Foo1|A1X158', 'ompA|A0A3B6XXR4', 'HfaB|P27343', 'SRFAA|P27206', 'tpbB|A0A0H2Z7X0', 'ompW|A0A0F4PBB9', 'HfsD|Q9A5L5', 'HfsF|Q9A5M1', 'HfsG|Q9A5M0', 'HfsH|Q9A5L9', 'SRFAC|Q08787', 'yfiB|Q9I4L6', 'sipW|P54506', 'ChiA|P32823', 'HfsC|Q9A5L8', 'HfsA|Q9A5L6', 'sdrC|A0A6A8FED6', 'SRFAD|Q08788']	5	srf_hfacces_foo_chia_sdrc	drag-reducing_adhesion_chitinase-production	3	192149	Muricauda sp.
GCA_014163915.1	20	['SRFAB|Q04747', 'Foo1|A1X158', 'ompA|A0A3B6XXR4', 'HfaB|P27343', 'SRFAA|P27206', 'OmpU|P0C6Q6', 'ompW|A0A0F4PBB9', 'pilF|A0A290TXQ9', 'HfsD|Q9A5L5', 'HfsG|Q9A5M0', 'HfsH|Q9A5L9', 'SRFAC|Q08787', 'yfiB|Q9I4L6', 'sipW|P54506', 'ChiA|P32823', 'yfiR|Q9I4L4', 'HfsA|Q9A5L6', 'sdrC|A0A6A8FED6', 'GbpA|C3LW75', 'SRFAD|Q08788']	8	srf_hfacces_foo_chia_omp_ompu_sdrc_gbpa	drag-reducing_adhesion_chitinase-production	3	2760946	Pseudoalteromonas sp. SR41-8
GCA_001634705.1	18	['SRFAA|P27206', 'SRFAB|Q04747', 'HfsD|Q9A5L5', 'OmpU|P0C6Q6', 'HfsF|Q9A5M1', 'HfsE|Q9A5M2', 'HfsG|Q9A5M0', 'sdrC|A0A6A8FED6', 'ompA|A0A3B6XXR4', 'SRFAC|Q08787', 'yfiB|Q9I4L6', 'ompW|A0A0F4PBB9', 'sipW|P54506', 'ChiA|P32823', 'HfsC|Q9A5L8', 'HfaB|P27343', 'HfsA|Q9A5L6', 'SRFAD|Q08788']	5	srf_hfacces_chia_ompu_sdrc	drag-reducing_adhesion_chitinase-production	3	1822221	Alcanivorax sp. HI0013
GCA_002701315.1	19	['SRFAB|Q04747', 'ompA|A0A3B6XXR4', 'SRFAA|P27206', 'OmpU|P0C6Q6', 'tpbB|A0A0H2Z7X0', 'ompW|A0A0F4PBB9', 'HfsD|Q9A5L5', 'HfsF|Q9A5M1', 'HfsE|Q9A5M2', 'HfsG|Q9A5M0', 'HfsH|Q9A5L9', 'SRFAC|Q08787', 'yfiB|Q9I4L6', 'sipW|P54506', 'ChiA|P32823', 'HfsC|Q9A5L8', 'yfiR|Q9I4L4', 'HfsA|Q9A5L6', 'SRFAD|Q08788']	5	srf_hfs_chia_yfi_ompu	drag-reducing_adhesion_chitinase-production	3	1891229	Pseudomonadales bacterium
GCA_002875745.1	30	['SRFAB|Q04747', 'CHPC|Q9AD93', 'Foo1|A1X158', 'ompA|A0A3B6XXR4', 'CHPE|Q9X9Z2', 'HfaB|P27343', 'SRFAA|P27206', 'OmpU|P0C6Q6', 'tpbB|A0A0H2Z7X0', 'ompW|A0A0F4PBB9', 'CHPG|Q9KYH3', 'RbmC|A0A2S1ZSI6', 'Bap1|Q9KQW0', 'CHPA|Q8CJY7', 'HfsD|Q9A5L5', 'HfsG|Q9A5M0', 'HfsH|Q9A5L9', 'SRFAC|Q08787', 'yfiB|Q9I4L6', 'CHPF|Q9KYG7', 'CHPH|Q9AD92', 'sipW|P54506', 'ChiA|P32823', 'HfsC|Q9A5L8', 'yfiR|Q9I4L4', 'Hfs…	10	srf_hfacces_chp_foo_chia_yfi_ompu_bap1_rbmc_gbpa	drag-reducing_adhesion_chitinase-production	3	136468	Vibrio lentus
GCA_002877415.1	20	['SRFAB|Q04747', 'ompA|A0A3B6XXR4', 'HfaB|P27343', 'SRFAA|P27206', 'OmpU|P0C6Q6', 'tpbB|A0A0H2Z7X0', 'ompW|A0A0F4PBB9', 'HfsD|Q9A5L5', 'HfsG|Q9A5M0', 'HfsE|Q9A5M2', 'HfsH|Q9A5L9', 'SRFAC|Q08787', 'yfiB|Q9I4L6', 'sipW|P54506', 'ChiA|P32823', 'HfsC|Q9A5L8', 'yfiR|Q9I4L4', 'HfsA|Q9A5L6', 'GbpA|C3LW75', 'SRFAD|Q08788']	6	srf_hfacces_chia_yfi_ompu_gbpa	drag-reducing_adhesion_chitinase-production	3	136468	Vibrio lentus
GCA_011440395.1	22	['SRFAB|Q04747', 'Foo1|A1X158', 'ompA|A0A3B6XXR4', 'HfaB|P27343', 'SRFAA|P27206', 'OmpU|P0C6Q6', 'tpbB|A0A0H2Z7X0', 'ompW|A0A0F4PBB9', 'HfsD|Q9A5L5', 'HfsF|Q9A5M1', 'HfsE|Q9A5M2', 'HfsG|Q9A5M0', 'HfsH|Q9A5L9', 'SRFAC|Q08787', 'yfiB|Q9I4L6', 'sipW|P54506', 'ChiA|P32823', 'HfsC|Q9A5L8', 'yfiR|Q9I4L4', 'HfsA|Q9A5L6', 'sdrC|A0A6A8FED6', 'SRFAD|Q08788']	8	srf_hfs_hfacces_foo_chia_yfi_ompu_sdrc	drag-reducing_adhesion_chitinase-production	3	1166482	Pseudomaricurvus alcaniphilus
GCA_002875625.1	24	['CHPC|Q9AD93', 'ompA|A0A3B6XXR4', 'CHPE|Q9X9Z2', 'HfaB|P27343', 'OmpU|P0C6Q6', 'tpbB|A0A0H2Z7X0', 'ompW|A0A0F4PBB9', 'CHPG|Q9KYH3', 'CHPA|Q8CJY7', 'HfsD|Q9A5L5', 'HfsG|Q9A5M0', 'HfsH|Q9A5L9', 'yfiB|Q9I4L6', 'CHPF|Q9KYG7', 'CHPH|Q9AD92', 'sipW|P54506', 'ChiA|P32823', 'HfsC|Q9A5L8', 'yfiR|Q9I4L4', 'HfsA|Q9A5L6', 'CHPB|Q9X7U2', 'CHPD|Q9L1J9', 'GbpA|C3LW75', 'SRFAD|Q08788']	6	hfacces_chp_chia_yfi_ompu_gbpa	adhesion_drag-reducing_chitinase-production	3	136468	Vibrio lentus
GCA_013248905.1	20	['SRFAB|Q04747', 'ompA|A0A3B6XXR4', 'HfaB|P27343', 'SRFAA|P27206', 'OmpU|P0C6Q6', 'tpbB|A0A0H2Z7X0', 'ompW|A0A0F4PBB9', 'HfsD|Q9A5L5', 'HfsF|Q9A5M1', 'HfsE|Q9A5M2', 'HfsG|Q9A5M0', 'HfsH|Q9A5L9', 'SRFAC|Q08787', 'yfiB|Q9I4L6', 'sipW|P54506', 'ChiA|P32823', 'HfsA|Q9A5L6', 'sdrC|A0A6A8FED6', 'GbpA|C3LW75', 'SRFAD|Q08788']	6	srf_hfacces_chia_ompu_sdrc_gbpa	drag-reducing_adhesion_chitinase-production	3	2739432	Shewanella sp. VB17
GCA_001691195.1	24	['CHPC|Q9AD93', 'ompA|A0A3B6XXR4', 'CHPE|Q9X9Z2', 'HfaB|P27343', 'OmpU|P0C6Q6', 'tpbB|A0A0H2Z7X0', 'ompW|A0A0F4PBB9', 'CHPG|Q9KYH3', 'CHPA|Q8CJY7', 'HfsD|Q9A5L5', 'HfsG|Q9A5M0', 'HfsH|Q9A5L9', 'yfiB|Q9I4L6', 'CHPF|Q9KYG7', 'CHPH|Q9AD92', 'sipW|P54506', 'ChiA|P32823', 'HfsC|Q9A5L8', 'yfiR|Q9I4L4', 'HfsA|Q9A5L6', 'CHPB|Q9X7U2', 'CHPD|Q9L1J9', 'GbpA|C3LW75', 'SRFAD|Q08788']	6	hfacces_chp_chia_yfi_ompu_gbpa	adhesion_drag-reducing_chitinase-production	3	136468	Vibrio lentus
GCA_002237405.1	22	['SRFAB|Q04747', 'ompA|A0A3B6XXR4', 'HfaB|P27343', 'SRFAA|P27206', 'OmpU|P0C6Q6', 'tpbB|A0A0H2Z7X0', 'ompW|A0A0F4PBB9', 'HfsD|Q9A5L5', 'HfsF|Q9A5M1', 'HfsE|Q9A5M2', 'HfsG|Q9A5M0', 'HfsH|Q9A5L9', 'SRFAC|Q08787', 'yfiB|Q9I4L6', 'sipW|P54506', 'ChiA|P32823', 'HfsC|Q9A5L8', 'yfiR|Q9I4L4', 'HfsA|Q9A5L6', 'sdrC|A0A6A8FED6', 'GbpA|C3LW75', 'SRFAD|Q08788']	8	srf_hfs_hfacces_chia_yfi_ompu_sdrc_gbpa	drag-reducing_adhesion_chitinase-production	3	287	Pseudomonas aeruginosa
GCA_900188335.1	16	['SRFAA|P27206', 'SRFAB|Q04747', 'HfsD|Q9A5L5', 'OmpU|P0C6Q6', 'HfsF|Q9A5M1', 'HfsE|Q9A5M2', 'HfsG|Q9A5M0', 'HfsH|Q9A5L9', 'sdrC|A0A6A8FED6', 'SRFAC|Q08787', 'yfiB|Q9I4L6', 'sipW|P54506', 'ChiA|P32823', 'HfsC|Q9A5L8', 'HfsA|Q9A5L6', 'SRFAD|Q08788']	5	srf_hfs_chia_ompu_sdrc	drag-reducing_adhesion_chitinase-production	3	1031541	Tropicimonas sediminicola
GCA_002875845.1	20	['SRFAB|Q04747', 'ompA|A0A3B6XXR4', 'HfaB|P27343', 'SRFAA|P27206', 'OmpU|P0C6Q6', 'tpbB|A0A0H2Z7X0', 'ompW|A0A0F4PBB9', 'HfsD|Q9A5L5', 'HfsG|Q9A5M0', 'HfsE|Q9A5M2', 'HfsH|Q9A5L9', 'SRFAC|Q08787', 'yfiB|Q9I4L6', 'sipW|P54506', 'ChiA|P32823', 'HfsC|Q9A5L8', 'yfiR|Q9I4L4', 'HfsA|Q9A5L6', 'GbpA|C3LW75', 'SRFAD|Q08788']	6	srf_hfacces_chia_yfi_ompu_gbpa	drag-reducing_adhesion_chitinase-production	3	136468	Vibrio lentus
GCA_002874555.1	29	['SRFAB|Q04747', 'CHPC|Q9AD93', 'ompA|A0A3B6XXR4', 'CHPE|Q9X9Z2', 'HfaB|P27343', 'SRFAA|P27206', 'OmpU|P0C6Q6', 'tpbB|A0A0H2Z7X0', 'ompW|A0A0F4PBB9', 'CHPG|Q9KYH3', 'RbmC|A0A2S1ZSI6', 'Bap1|Q9KQW0', 'CHPA|Q8CJY7', 'HfsD|Q9A5L5', 'HfsG|Q9A5M0', 'HfsH|Q9A5L9', 'SRFAC|Q08787', 'yfiB|Q9I4L6', 'CHPF|Q9KYG7', 'CHPH|Q9AD92', 'sipW|P54506', 'ChiA|P32823', 'HfsC|Q9A5L8', 'yfiR|Q9I4L4', 'HfsA|Q9A5L6', 'CHP…	9	srf_hfacces_chp_chia_yfi_ompu_bap1_rbmc_gbpa	drag-reducing_adhesion_chitinase-production	3	136468	Vibrio lentus
GCA_900141635.1	15	['HfsD|Q9A5L5', 'HfsF|Q9A5M1', 'HfsH|Q9A5L9', 'HfsG|Q9A5M0', 'GalL|C0HLX7', 'tpbB|A0A0H2Z7X0', 'sdrC|A0A6A8FED6', 'ompA|A0A3B6XXR4', 'yfiB|Q9I4L6', 'sipW|P54506', 'RbmC|A0A2S1ZSI6', 'ChiA|P32823', 'HfsC|Q9A5L8', 'HfsA|Q9A5L6', 'Bap1|Q9KQW0']	5	chia_gal_sdrc_bap1_rbmc	chitinase-production_colonization-resistance_adhesion	3	1121324	Peptoclostridium litorale
GCA_014705705.1	18	['SRFAA|P27206', 'SRFAB|Q04747', 'HfsD|Q9A5L5', 'Foo1|A1X158', 'HfsF|Q9A5M1', 'HfsE|Q9A5M2', 'HfsG|Q9A5M0', 'OmpU|P0C6Q6', 'ompA|A0A3B6XXR4', 'SRFAC|Q08787', 'yfiB|Q9I4L6', 'sipW|P54506', 'RbmC|A0A2S1ZSI6', 'ChiA|P32823', 'HfsC|Q9A5L8', 'HfsA|Q9A5L6', 'Bap1|Q9KQW0', 'SRFAD|Q08788']	6	srf_foo_chia_ompu_bap1_rbmc	drag-reducing_adhesion_chitinase-production	3	2760804	Spongiibacter pelagi
GCA_002876105.1	30	['SRFAB|Q04747', 'CHPC|Q9AD93', 'ompA|A0A3B6XXR4', 'CHPE|Q9X9Z2', 'HfaB|P27343', 'SRFAA|P27206', 'OmpU|P0C6Q6', 'tpbB|A0A0H2Z7X0', 'ompW|A0A0F4PBB9', 'CHPG|Q9KYH3', 'RbmC|A0A2S1ZSI6', 'Bap1|Q9KQW0', 'CHPA|Q8CJY7', 'HfsD|Q9A5L5', 'HfsG|Q9A5M0', 'HfsE|Q9A5M2', 'HfsH|Q9A5L9', 'SRFAC|Q08787', 'yfiB|Q9I4L6', 'CHPF|Q9KYG7', 'CHPH|Q9AD92', 'sipW|P54506', 'ChiA|P32823', 'HfsC|Q9A5L8', 'yfiR|Q9I4L4', 'Hfs…	9	srf_hfacces_chp_chia_yfi_ompu_bap1_rbmc_gbpa	drag-reducing_adhesion_chitinase-production	3	136468	Vibrio lentus
GCA_002712625.1	15	['SRFAA|P27206', 'SRFAB|Q04747', 'HfsD|Q9A5L5', 'HfsF|Q9A5M1', 'bslB|P39632', 'HfsE|Q9A5M2', 'HfsG|Q9A5M0', 'sdrC|A0A6A8FED6', 'ompA|A0A3B6XXR4', 'SRFAC|Q08787', 'yfiB|Q9I4L6', 'sipW|P54506', 'ChiA|P32823', 'HfsC|Q9A5L8', 'bslA|P71014']	3	bsl_chia_sdrc	drag-reducing_chitinase-production_adhesion	3	2026790	Saprospirales bacterium
GCA_001625655.1	19	['SRFAB|Q04747', 'Foo1|A1X158', 'ompA|A0A3B6XXR4', 'HfaB|P27343', 'SRFAA|P27206', 'OmpU|P0C6Q6', 'ompW|A0A0F4PBB9', 'HfsD|Q9A5L5', 'HfsF|Q9A5M1', 'HfsG|Q9A5M0', 'HfsH|Q9A5L9', 'SRFAC|Q08787', 'yfiB|Q9I4L6', 'sipW|P54506', 'ChiA|P32823', 'yfiR|Q9I4L4', 'HfsA|Q9A5L6', 'GbpA|C3LW75', 'SRFAD|Q08788']	6	srf_hfacces_foo_chia_ompu_gbpa	drag-reducing_adhesion_chitinase-production	3	1365250	Pseudoalteromonas luteoviolacea
GCA_002873115.1	25	['CHPC|Q9AD93', 'Foo1|A1X158', 'ompA|A0A3B6XXR4', 'CHPE|Q9X9Z2', 'HfaB|P27343', 'OmpU|P0C6Q6', 'tpbB|A0A0H2Z7X0', 'ompW|A0A0F4PBB9', 'CHPG|Q9KYH3', 'CHPA|Q8CJY7', 'HfsD|Q9A5L5', 'HfsG|Q9A5M0', 'HfsH|Q9A5L9', 'yfiB|Q9I4L6', 'CHPF|Q9KYG7', 'CHPH|Q9AD92', 'sipW|P54506', 'ChiA|P32823', 'HfsC|Q9A5L8', 'yfiR|Q9I4L4', 'HfsA|Q9A5L6', 'CHPB|Q9X7U2', 'CHPD|Q9L1J9', 'GbpA|C3LW75', 'SRFAD|Q08788']	7	hfacces_chp_foo_chia_yfi_ompu_gbpa	adhesion_drag-reducing_chitinase-production	3	136468	Vibrio lentus
GCA_002873475.1	28	['SRFAB|Q04747', 'CHPC|Q9AD93', 'ompA|A0A3B6XXR4', 'CHPE|Q9X9Z2', 'HfaB|P27343', 'SRFAA|P27206', 'OmpU|P0C6Q6', 'tpbB|A0A0H2Z7X0', 'ompW|A0A0F4PBB9', 'CHPG|Q9KYH3', 'CHPA|Q8CJY7', 'HfsD|Q9A5L5', 'HfsG|Q9A5M0', 'HfsE|Q9A5M2', 'HfsH|Q9A5L9', 'SRFAC|Q08787', 'yfiB|Q9I4L6', 'CHPF|Q9KYG7', 'CHPH|Q9AD92', 'sipW|P54506', 'ChiA|P32823', 'HfsC|Q9A5L8', 'yfiR|Q9I4L4', 'HfsA|Q9A5L6', 'CHPB|Q9X7U2', 'CHPD|Q9…	7	srf_hfacces_chp_chia_yfi_ompu_gbpa	drag-reducing_adhesion_chitinase-production	3	136468	Vibrio lentus
GCA_002875805.1	26	['SRFAB|Q04747', 'CHPC|Q9AD93', 'ompA|A0A3B6XXR4', 'CHPE|Q9X9Z2', 'HfaB|P27343', 'SRFAA|P27206', 'OmpU|P0C6Q6', 'tpbB|A0A0H2Z7X0', 'ompW|A0A0F4PBB9', 'CHPG|Q9KYH3', 'CHPA|Q8CJY7', 'HfsD|Q9A5L5', 'HfsG|Q9A5M0', 'HfsH|Q9A5L9', 'SRFAC|Q08787', 'yfiB|Q9I4L6', 'CHPF|Q9KYG7', 'CHPH|Q9AD92', 'sipW|P54506', 'ChiA|P32823', 'HfsC|Q9A5L8', 'HfsA|Q9A5L6', 'CHPB|Q9X7U2', 'CHPD|Q9L1J9', 'GbpA|C3LW75', 'SRFAD|Q…	6	srf_hfacces_chp_chia_ompu_gbpa	drag-reducing_adhesion_chitinase-production	3	136468	Vibrio lentus
GCA_002875665.1	29	['SRFAB|Q04747', 'CHPC|Q9AD93', 'ompA|A0A3B6XXR4', 'CHPE|Q9X9Z2', 'HfaB|P27343', 'SRFAA|P27206', 'OmpU|P0C6Q6', 'tpbB|A0A0H2Z7X0', 'ompW|A0A0F4PBB9', 'CHPG|Q9KYH3', 'RbmC|A0A2S1ZSI6', 'Bap1|Q9KQW0', 'CHPA|Q8CJY7', 'HfsD|Q9A5L5', 'HfsG|Q9A5M0', 'HfsH|Q9A5L9', 'SRFAC|Q08787', 'yfiB|Q9I4L6', 'CHPF|Q9KYG7', 'CHPH|Q9AD92', 'sipW|P54506', 'ChiA|P32823', 'HfsC|Q9A5L8', 'yfiR|Q9I4L4', 'HfsA|Q9A5L6', 'CHP…	9	srf_hfacces_chp_chia_yfi_ompu_bap1_rbmc_gbpa	drag-reducing_adhesion_chitinase-production	3	136468	Vibrio lentus
GCA_002237425.1	22	['SRFAB|Q04747', 'ompA|A0A3B6XXR4', 'HfaB|P27343', 'SRFAA|P27206', 'OmpU|P0C6Q6', 'tpbB|A0A0H2Z7X0', 'ompW|A0A0F4PBB9', 'HfsD|Q9A5L5', 'HfsF|Q9A5M1', 'HfsE|Q9A5M2', 'HfsG|Q9A5M0', 'HfsH|Q9A5L9', 'SRFAC|Q08787', 'yfiB|Q9I4L6', 'sipW|P54506', 'ChiA|P32823', 'HfsC|Q9A5L8', 'yfiR|Q9I4L4', 'HfsA|Q9A5L6', 'sdrC|A0A6A8FED6', 'GbpA|C3LW75', 'SRFAD|Q08788']	8	srf_hfs_hfacces_chia_yfi_ompu_sdrc_gbpa	drag-reducing_adhesion_chitinase-production	3	287	Pseudomonas aeruginosa
GCA_002208135.1	23	['SRFAB|Q04747', 'Foo1|A1X158', 'ompA|A0A3B6XXR4', 'HfaB|P27343', 'SRFAA|P27206', 'OmpU|P0C6Q6', 'tpbB|A0A0H2Z7X0', 'ompW|A0A0F4PBB9', 'Bap1|Q9KQW0', 'pilF|A0A290TXQ9', 'HfsD|Q9A5L5', 'HfsG|Q9A5M0', 'HfsH|Q9A5L9', 'SRFAC|Q08787', 'yfiB|Q9I4L6', 'sipW|P54506', 'ChiA|P32823', 'HfsC|Q9A5L8', 'yfiR|Q9I4L4', 'HfsA|Q9A5L6', 'sdrC|A0A6A8FED6', 'GbpA|C3LW75', 'SRFAD|Q08788']	10	srf_hfacces_foo_chia_omp_yfi_ompu_sdrc_bap1_gbpa	drag-reducing_adhesion_chitinase-production	3	43662	Pseudoalteromonas piscicida
GCA_002875385.1	22	['SRFAB|Q04747', 'ompA|A0A3B6XXR4', 'HfaB|P27343', 'SRFAA|P27206', 'OmpU|P0C6Q6', 'tpbB|A0A0H2Z7X0', 'ompW|A0A0F4PBB9', 'RbmC|A0A2S1ZSI6', 'Bap1|Q9KQW0', 'HfsD|Q9A5L5', 'HfsG|Q9A5M0', 'HfsE|Q9A5M2', 'HfsH|Q9A5L9', 'SRFAC|Q08787', 'yfiB|Q9I4L6', 'sipW|P54506', 'ChiA|P32823', 'HfsC|Q9A5L8', 'yfiR|Q9I4L4', 'HfsA|Q9A5L6', 'GbpA|C3LW75', 'SRFAD|Q08788']	8	srf_hfacces_chia_yfi_ompu_bap1_rbmc_gbpa	drag-reducing_adhesion_chitinase-production	3	1880840	Vibrio sp. 10N.222.52.B12
GCA_002872865.1	23	['CHPC|Q9AD93', 'ompA|A0A3B6XXR4', 'CHPE|Q9X9Z2', 'HfaB|P27343', 'OmpU|P0C6Q6', 'tpbB|A0A0H2Z7X0', 'CHPG|Q9KYH3', 'CHPA|Q8CJY7', 'HfsD|Q9A5L5', 'HfsG|Q9A5M0', 'HfsH|Q9A5L9', 'yfiB|Q9I4L6', 'CHPF|Q9KYG7', 'CHPH|Q9AD92', 'sipW|P54506', 'ChiA|P32823', 'HfsC|Q9A5L8', 'yfiR|Q9I4L4', 'HfsA|Q9A5L6', 'CHPB|Q9X7U2', 'CHPD|Q9L1J9', 'GbpA|C3LW75', 'SRFAD|Q08788']	6	hfacces_chp_chia_yfi_ompu_gbpa	adhesion_drag-reducing_chitinase-production	3	136468	Vibrio lentus
GCA_002872925.1	24	['CHPC|Q9AD93', 'ompA|A0A3B6XXR4', 'CHPE|Q9X9Z2', 'HfaB|P27343', 'OmpU|P0C6Q6', 'tpbB|A0A0H2Z7X0', 'ompW|A0A0F4PBB9', 'CHPG|Q9KYH3', 'CHPA|Q8CJY7', 'HfsD|Q9A5L5', 'HfsG|Q9A5M0', 'HfsH|Q9A5L9', 'yfiB|Q9I4L6', 'CHPF|Q9KYG7', 'CHPH|Q9AD92', 'sipW|P54506', 'ChiA|P32823', 'HfsC|Q9A5L8', 'yfiR|Q9I4L4', 'HfsA|Q9A5L6', 'CHPB|Q9X7U2', 'CHPD|Q9L1J9', 'GbpA|C3LW75', 'SRFAD|Q08788']	6	hfacces_chp_chia_yfi_ompu_gbpa	adhesion_drag-reducing_chitinase-production	3	136468	Vibrio lentus
GCA_002876365.1	22	['SRFAB|Q04747', 'ompA|A0A3B6XXR4', 'HfaB|P27343', 'SRFAA|P27206', 'OmpU|P0C6Q6', 'tpbB|A0A0H2Z7X0', 'ompW|A0A0F4PBB9', 'RbmC|A0A2S1ZSI6', 'Bap1|Q9KQW0', 'HfsD|Q9A5L5', 'HfsG|Q9A5M0', 'HfsE|Q9A5M2', 'HfsH|Q9A5L9', 'SRFAC|Q08787', 'yfiB|Q9I4L6', 'sipW|P54506', 'ChiA|P32823', 'HfsC|Q9A5L8', 'yfiR|Q9I4L4', 'HfsA|Q9A5L6', 'GbpA|C3LW75', 'SRFAD|Q08788']	8	srf_hfacces_chia_yfi_ompu_bap1_rbmc_gbpa	drag-reducing_adhesion_chitinase-production	3	136468	Vibrio lentus
GCA_004328055.1	18	['SRFAA|P27206', 'SRFAB|Q04747', 'HfsD|Q9A5L5', 'HfsF|Q9A5M1', 'HfsE|Q9A5M2', 'HfsG|Q9A5M0', 'HfsH|Q9A5L9', 'tpbB|A0A0H2Z7X0', 'sdrC|A0A6A8FED6', 'SRFAC|Q08787', 'ompA|A0A3B6XXR4', 'yfiB|Q9I4L6', 'ompW|A0A0F4PBB9', 'sipW|P54506', 'ChiA|P32823', 'HfsC|Q9A5L8', 'HfsA|Q9A5L6', 'SRFAD|Q08788']	4	srf_hfs_chia_sdrc	drag-reducing_adhesion_chitinase-production	3	1197472	unclassified
GCA_014164575.1	22	['SRFAB|Q04747', 'Foo1|A1X158', 'ompA|A0A3B6XXR4', 'HfaB|P27343', 'SRFAA|P27206', 'OmpU|P0C6Q6', 'ompW|A0A0F4PBB9', 'pilF|A0A290TXQ9', 'HfsD|Q9A5L5', 'HfsF|Q9A5M1', 'HfsE|Q9A5M2', 'HfsG|Q9A5M0', 'HfsH|Q9A5L9', 'SRFAC|Q08787', 'yfiB|Q9I4L6', 'sipW|P54506', 'ChiA|P32823', 'yfiR|Q9I4L4', 'HfsA|Q9A5L6', 'sdrC|A0A6A8FED6', 'GbpA|C3LW75', 'SRFAD|Q08788']	8	srf_hfacces_foo_chia_omp_ompu_sdrc_gbpa	drag-reducing_adhesion_chitinase-production	3	2760979	Pseudoalteromonas sp. SG41-1
GCA_000091325.1	21	['SRFAB|Q04747', 'Foo1|A1X158', 'ompA|A0A3B6XXR4', 'HfaB|P27343', 'SRFAA|P27206', 'OmpU|P0C6Q6', 'tpbB|A0A0H2Z7X0', 'ompW|A0A0F4PBB9', 'HfsD|Q9A5L5', 'HfsF|Q9A5M1', 'HfsG|Q9A5M0', 'HfsH|Q9A5L9', 'SRFAC|Q08787', 'yfiB|Q9I4L6', 'sipW|P54506', 'ChiA|P32823', 'HfsC|Q9A5L8', 'HfsA|Q9A5L6', 'sdrC|A0A6A8FED6', 'GbpA|C3LW75', 'SRFAD|Q08788']	7	srf_hfacces_foo_chia_ompu_sdrc_gbpa	drag-reducing_adhesion_chitinase-production	3	637905	Shewanella violacea
GCA_000155555.1	17	['SRFAA|P27206', 'SRFAB|Q04747', 'HfsD|Q9A5L5', 'Foo1|A1X158', 'HfsF|Q9A5M1', 'HfsG|Q9A5M0', 'HfsH|Q9A5L9', 'sdrC|A0A6A8FED6', 'SRFAC|Q08787', 'yfiB|Q9I4L6', 'sipW|P54506', 'RbmC|A0A2S1ZSI6', 'ChiA|P32823', 'HfsC|Q9A5L8', 'HfsA|Q9A5L6', 'Bap1|Q9KQW0', 'SRFAD|Q08788']	6	srf_foo_chia_sdrc_bap1_rbmc	drag-reducing_adhesion_chitinase-production	3	118168	Coleofasciculus chthonoplastes
GCA_002694845.1	20	['SRFAB|Q04747', 'Foo1|A1X158', 'SRFAA|P27206', 'OmpU|P0C6Q6', 'tpbB|A0A0H2Z7X0', 'ompW|A0A0F4PBB9', 'RbmC|A0A2S1ZSI6', 'Bap1|Q9KQW0', 'HfsD|Q9A5L5', 'HfsF|Q9A5M1', 'HfsE|Q9A5M2', 'HfsG|Q9A5M0', 'HfsH|Q9A5L9', 'SRFAC|Q08787', 'yfiB|Q9I4L6', 'sipW|P54506', 'ChiA|P32823', 'HfsC|Q9A5L8', 'HfsA|Q9A5L6', 'SRFAD|Q08788']	7	srf_hfs_foo_chia_ompu_bap1_rbmc	drag-reducing_adhesion_chitinase-production	3	2024861	Tistrella sp.
GCA_001635525.1	18	['SRFAA|P27206', 'SRFAB|Q04747', 'HfsD|Q9A5L5', 'OmpU|P0C6Q6', 'HfsF|Q9A5M1', 'HfsE|Q9A5M2', 'HfsG|Q9A5M0', 'sdrC|A0A6A8FED6', 'ompA|A0A3B6XXR4', 'SRFAC|Q08787', 'yfiB|Q9I4L6', 'ompW|A0A0F4PBB9', 'sipW|P54506', 'ChiA|P32823', 'HfsC|Q9A5L8', 'HfaB|P27343', 'HfsA|Q9A5L6', 'SRFAD|Q08788']	5	srf_hfacces_chia_ompu_sdrc	drag-reducing_adhesion_chitinase-production	3	1822218	Alcanivorax sp. HI0007
GCA_002701845.1	20	['SRFAB|Q04747', 'ompA|A0A3B6XXR4', 'SRFAA|P27206', 'OmpU|P0C6Q6', 'tpbB|A0A0H2Z7X0', 'ompW|A0A0F4PBB9', 'HfsD|Q9A5L5', 'HfsF|Q9A5M1', 'HfsE|Q9A5M2', 'HfsG|Q9A5M0', 'HfsH|Q9A5L9', 'SRFAC|Q08787', 'yfiB|Q9I4L6', 'sipW|P54506', 'ChiA|P32823', 'HfsC|Q9A5L8', 'yfiR|Q9I4L4', 'HfsA|Q9A5L6', 'sdrC|A0A6A8FED6', 'SRFAD|Q08788']	6	srf_hfs_chia_yfi_ompu_sdrc	drag-reducing_adhesion_chitinase-production	3	1891229	Pseudomonadales bacterium
GCA_002877445.1	24	['CHPC|Q9AD93', 'ompA|A0A3B6XXR4', 'CHPE|Q9X9Z2', 'HfaB|P27343', 'OmpU|P0C6Q6', 'tpbB|A0A0H2Z7X0', 'ompW|A0A0F4PBB9', 'CHPG|Q9KYH3', 'CHPA|Q8CJY7', 'HfsD|Q9A5L5', 'HfsG|Q9A5M0', 'HfsH|Q9A5L9', 'yfiB|Q9I4L6', 'CHPF|Q9KYG7', 'CHPH|Q9AD92', 'sipW|P54506', 'ChiA|P32823', 'HfsC|Q9A5L8', 'yfiR|Q9I4L4', 'HfsA|Q9A5L6', 'CHPB|Q9X7U2', 'CHPD|Q9L1J9', 'GbpA|C3LW75', 'SRFAD|Q08788']	6	hfacces_chp_chia_yfi_ompu_gbpa	adhesion_drag-reducing_chitinase-production	3	136468	Vibrio lentus
GCA_002692685.1	11	['SRFAA|P27206', 'SRFAB|Q04747', 'HfsG|Q9A5M0', 'HfsH|Q9A5L9', 'SRFAC|Q08787', 'pilF|A0A290TXQ9', 'sipW|P54506', 'RbmC|A0A2S1ZSI6', 'ChiA|P32823', 'Bap1|Q9KQW0', 'SRFAD|Q08788']	4	srf_chia_bap1_rbmc	drag-reducing_chitinase-production_adhesion	3	2026785	Rhodobiaceae bacterium
GCA_009363455.1	19	['SRFAB|Q04747', 'ompA|A0A3B6XXR4', 'HfaB|P27343', 'SRFAA|P27206', 'OmpU|P0C6Q6', 'ompW|A0A0F4PBB9', 'HfsD|Q9A5L5', 'HfsF|Q9A5M1', 'HfsE|Q9A5M2', 'HfsG|Q9A5M0', 'HfsH|Q9A5L9', 'SRFAC|Q08787', 'yfiB|Q9I4L6', 'sipW|P54506', 'ChiA|P32823', 'HfsC|Q9A5L8', 'HfsA|Q9A5L6', 'GbpA|C3LW75', 'SRFAD|Q08788']	6	srf_hfs_hfacces_chia_ompu_gbpa	drag-reducing_adhesion_chitinase-production	3	2587860	Vibrio sp. THAF64
GCA_002874445.1	27	['SRFAB|Q04747', 'CHPC|Q9AD93', 'ompA|A0A3B6XXR4', 'CHPE|Q9X9Z2', 'HfaB|P27343', 'SRFAA|P27206', 'OmpU|P0C6Q6', 'tpbB|A0A0H2Z7X0', 'ompW|A0A0F4PBB9', 'CHPG|Q9KYH3', 'CHPA|Q8CJY7', 'HfsD|Q9A5L5', 'HfsG|Q9A5M0', 'HfsH|Q9A5L9', 'SRFAC|Q08787', 'yfiB|Q9I4L6', 'CHPF|Q9KYG7', 'CHPH|Q9AD92', 'sipW|P54506', 'ChiA|P32823', 'HfsC|Q9A5L8', 'yfiR|Q9I4L4', 'HfsA|Q9A5L6', 'CHPB|Q9X7U2', 'CHPD|Q9L1J9', 'GbpA|C3…	7	srf_hfacces_chp_chia_yfi_ompu_gbpa	drag-reducing_adhesion_chitinase-production	3	136468	Vibrio lentus
GCA_002873185.1	26	['CHPC|Q9AD93', 'Foo1|A1X158', 'ompA|A0A3B6XXR4', 'CHPE|Q9X9Z2', 'HfaB|P27343', 'OmpU|P0C6Q6', 'tpbB|A0A0H2Z7X0', 'ompW|A0A0F4PBB9', 'CHPG|Q9KYH3', 'CHPA|Q8CJY7', 'HfsD|Q9A5L5', 'HfsF|Q9A5M1', 'HfsG|Q9A5M0', 'HfsH|Q9A5L9', 'yfiB|Q9I4L6', 'CHPF|Q9KYG7', 'CHPH|Q9AD92', 'sipW|P54506', 'ChiA|P32823', 'HfsC|Q9A5L8', 'yfiR|Q9I4L4', 'HfsA|Q9A5L6', 'CHPB|Q9X7U2', 'CHPD|Q9L1J9', 'GbpA|C3LW75', 'SRFAD|Q087…	7	hfacces_chp_foo_chia_yfi_ompu_gbpa	adhesion_drag-reducing_chitinase-production	3	136468	Vibrio lentus
GCA_000013765.1	20	['SRFAB|Q04747', 'Foo1|A1X158', 'ompA|A0A3B6XXR4', 'HfaB|P27343', 'SRFAA|P27206', 'OmpU|P0C6Q6', 'ompW|A0A0F4PBB9', 'HfsD|Q9A5L5', 'HfsF|Q9A5M1', 'HfsG|Q9A5M0', 'HfsH|Q9A5L9', 'SRFAC|Q08787', 'yfiB|Q9I4L6', 'sipW|P54506', 'ChiA|P32823', 'yfiR|Q9I4L4', 'HfsA|Q9A5L6', 'sdrC|A0A6A8FED6', 'GbpA|C3LW75', 'SRFAD|Q08788']	7	srf_hfacces_foo_chia_ompu_sdrc_gbpa	drag-reducing_adhesion_chitinase-production	3	318161	Shewanella denitrificans
GCA_002874135.1	25	['CHPC|Q9AD93', 'ompA|A0A3B6XXR4', 'CHPE|Q9X9Z2', 'HfaB|P27343', 'OmpU|P0C6Q6', 'tpbB|A0A0H2Z7X0', 'ompW|A0A0F4PBB9', 'CHPG|Q9KYH3', 'CHPA|Q8CJY7', 'HfsD|Q9A5L5', 'HfsF|Q9A5M1', 'HfsG|Q9A5M0', 'HfsH|Q9A5L9', 'yfiB|Q9I4L6', 'CHPF|Q9KYG7', 'CHPH|Q9AD92', 'sipW|P54506', 'ChiA|P32823', 'HfsC|Q9A5L8', 'yfiR|Q9I4L4', 'HfsA|Q9A5L6', 'CHPB|Q9X7U2', 'CHPD|Q9L1J9', 'GbpA|C3LW75', 'SRFAD|Q08788']	6	hfacces_chp_chia_yfi_ompu_gbpa	adhesion_drag-reducing_chitinase-production	3	136468	Vibrio lentus
GCA_002872835.1	25	['CHPC|Q9AD93', 'ompA|A0A3B6XXR4', 'CHPE|Q9X9Z2', 'HfaB|P27343', 'OmpU|P0C6Q6', 'tpbB|A0A0H2Z7X0', 'ompW|A0A0F4PBB9', 'CHPG|Q9KYH3', 'CHPA|Q8CJY7', 'HfsD|Q9A5L5', 'HfsF|Q9A5M1', 'HfsG|Q9A5M0', 'HfsH|Q9A5L9', 'yfiB|Q9I4L6', 'CHPF|Q9KYG7', 'CHPH|Q9AD92', 'sipW|P54506', 'ChiA|P32823', 'HfsC|Q9A5L8', 'yfiR|Q9I4L4', 'HfsA|Q9A5L6', 'CHPB|Q9X7U2', 'CHPD|Q9L1J9', 'GbpA|C3LW75', 'SRFAD|Q08788']	6	hfacces_chp_chia_yfi_ompu_gbpa	adhesion_drag-reducing_chitinase-production	3	136468	Vibrio lentus
GCA_002875945.1	27	['CHPC|Q9AD93', 'ompA|A0A3B6XXR4', 'CHPE|Q9X9Z2', 'HfaB|P27343', 'OmpU|P0C6Q6', 'tpbB|A0A0H2Z7X0', 'ompW|A0A0F4PBB9', 'CHPG|Q9KYH3', 'RbmC|A0A2S1ZSI6', 'Bap1|Q9KQW0', 'CHPA|Q8CJY7', 'HfsD|Q9A5L5', 'HfsG|Q9A5M0', 'HfsE|Q9A5M2', 'HfsH|Q9A5L9', 'yfiB|Q9I4L6', 'CHPF|Q9KYG7', 'CHPH|Q9AD92', 'sipW|P54506', 'ChiA|P32823', 'HfsC|Q9A5L8', 'yfiR|Q9I4L4', 'HfsA|Q9A5L6', 'CHPB|Q9X7U2', 'CHPD|Q9L1J9', 'GbpA|C…	8	hfacces_chp_chia_yfi_ompu_bap1_rbmc_gbpa	adhesion_drag-reducing_chitinase-production	3	136468	Vibrio lentus
GCA_002711825.1	20	['SRFAB|Q04747', 'Foo1|A1X158', 'ompA|A0A3B6XXR4', 'SRFAA|P27206', 'tpbB|A0A0H2Z7X0', 'ompW|A0A0F4PBB9', 'RbmC|A0A2S1ZSI6', 'Bap1|Q9KQW0', 'HfsD|Q9A5L5', 'HfsF|Q9A5M1', 'HfsG|Q9A5M0', 'HfsH|Q9A5L9', 'SRFAC|Q08787', 'yfiB|Q9I4L6', 'sipW|P54506', 'ChiA|P32823', 'HfsC|Q9A5L8', 'HfsA|Q9A5L6', 'sdrC|A0A6A8FED6', 'SRFAD|Q08788']	6	srf_foo_chia_sdrc_bap1_rbmc	drag-reducing_adhesion_chitinase-production	3	192149	Muricauda sp.
GCA_002874155.1	22	['SRFAB|Q04747', 'ompA|A0A3B6XXR4', 'HfaB|P27343', 'SRFAA|P27206', 'OmpU|P0C6Q6', 'tpbB|A0A0H2Z7X0', 'ompW|A0A0F4PBB9', 'RbmC|A0A2S1ZSI6', 'Bap1|Q9KQW0', 'HfsD|Q9A5L5', 'HfsG|Q9A5M0', 'HfsE|Q9A5M2', 'HfsH|Q9A5L9', 'SRFAC|Q08787', 'yfiB|Q9I4L6', 'sipW|P54506', 'ChiA|P32823', 'HfsC|Q9A5L8', 'yfiR|Q9I4L4', 'HfsA|Q9A5L6', 'GbpA|C3LW75', 'SRFAD|Q08788']	8	srf_hfacces_chia_yfi_ompu_bap1_rbmc_gbpa	drag-reducing_adhesion_chitinase-production	3	136468	Vibrio lentus
GCA_002873995.1	26	['CHPC|Q9AD93', 'Foo1|A1X158', 'ompA|A0A3B6XXR4', 'CHPE|Q9X9Z2', 'HfaB|P27343', 'OmpU|P0C6Q6', 'tpbB|A0A0H2Z7X0', 'ompW|A0A0F4PBB9', 'CHPG|Q9KYH3', 'CHPA|Q8CJY7', 'HfsD|Q9A5L5', 'HfsF|Q9A5M1', 'HfsG|Q9A5M0', 'HfsH|Q9A5L9', 'yfiB|Q9I4L6', 'CHPF|Q9KYG7', 'CHPH|Q9AD92', 'sipW|P54506', 'ChiA|P32823', 'HfsC|Q9A5L8', 'yfiR|Q9I4L4', 'HfsA|Q9A5L6', 'CHPB|Q9X7U2', 'CHPD|Q9L1J9', 'GbpA|C3LW75', 'SRFAD|Q087…	7	hfacces_chp_foo_chia_yfi_ompu_gbpa	adhesion_drag-reducing_chitinase-production	3	136468	Vibrio lentus
GCA_000192865.1	17	['SRFAA|P27206', 'SRFAB|Q04747', 'HfsD|Q9A5L5', 'OmpU|P0C6Q6', 'HfsG|Q9A5M0', 'HfsE|Q9A5M2', 'HfsH|Q9A5L9', 'sdrC|A0A6A8FED6', 'ompA|A0A3B6XXR4', 'SRFAC|Q08787', 'yfiB|Q9I4L6', 'ompW|A0A0F4PBB9', 'sipW|P54506', 'ChiA|P32823', 'HfsC|Q9A5L8', 'HfsA|Q9A5L6', 'SRFAD|Q08788']	4	srf_chia_ompu_sdrc	drag-reducing_chitinase-production_adhesion	3	717774	Marinomonas mediterranea
GCA_004323735.1	25	['SRFAB|Q04747', 'CHPC|Q9AD93', 'Foo1|A1X158', 'ompA|A0A3B6XXR4', 'CHPE|Q9X9Z2', 'SRFAA|P27206', 'CHPG|Q9KYH3', 'CHPA|Q8CJY7', 'HfsD|Q9A5L5', 'HfsF|Q9A5M1', 'HfsE|Q9A5M2', 'HfsG|Q9A5M0', 'HfsH|Q9A5L9', 'SRFAC|Q08787', 'yfiB|Q9I4L6', 'CHPF|Q9KYG7', 'CHPH|Q9AD92', 'sipW|P54506', 'ChiA|P32823', 'HfsC|Q9A5L8', 'HfsA|Q9A5L6', 'CHPB|Q9X7U2', 'CHPD|Q9L1J9', 'GbpA|C3LW75', 'SRFAD|Q08788']	6	srf_hfs_chp_foo_chia_gbpa	drag-reducing_adhesion_chitinase-production	3	2498135	Streptomonospora litoralis
GCA_002706505.1	17	['SRFAA|P27206', 'SRFAB|Q04747', 'HfsD|Q9A5L5', 'Foo1|A1X158', 'HfsF|Q9A5M1', 'HfsE|Q9A5M2', 'HfsG|Q9A5M0', 'tpbB|A0A0H2Z7X0', 'ompA|A0A3B6XXR4', 'SRFAC|Q08787', 'yfiB|Q9I4L6', 'ompW|A0A0F4PBB9', 'sipW|P54506', 'ChiA|P32823', 'HfsC|Q9A5L8', 'HfsA|Q9A5L6', 'SRFAD|Q08788']	3	srf_foo_chia	drag-reducing_adhesion_chitinase-production	3	2024860	Spongiibacter sp.
GCA_002877115.1	28	['SRFAB|Q04747', 'CHPC|Q9AD93', 'ompA|A0A3B6XXR4', 'CHPE|Q9X9Z2', 'HfaB|P27343', 'SRFAA|P27206', 'OmpU|P0C6Q6', 'tpbB|A0A0H2Z7X0', 'ompW|A0A0F4PBB9', 'CHPG|Q9KYH3', 'CHPA|Q8CJY7', 'HfsD|Q9A5L5', 'HfsF|Q9A5M1', 'HfsG|Q9A5M0', 'HfsH|Q9A5L9', 'SRFAC|Q08787', 'yfiB|Q9I4L6', 'CHPF|Q9KYG7', 'CHPH|Q9AD92', 'sipW|P54506', 'ChiA|P32823', 'HfsC|Q9A5L8', 'yfiR|Q9I4L4', 'HfsA|Q9A5L6', 'CHPB|Q9X7U2', 'CHPD|Q9…	7	srf_hfacces_chp_chia_yfi_ompu_gbpa	drag-reducing_adhesion_chitinase-production	3	136468	Vibrio lentus
GCA_009496005.1	13	['bslA|P71014', 'HfsD|Q9A5L5', 'OmpU|P0C6Q6', 'HfsG|Q9A5M0', 'bslB|P39632', 'HfsH|Q9A5L9', 'yfiB|Q9I4L6', 'ompW|A0A0F4PBB9', 'sipW|P54506', 'ChiA|P32823', 'HfsC|Q9A5L8', 'HfsA|Q9A5L6', 'SRFAD|Q08788']	3	bsl_chia_ompu	drag-reducing_chitinase-production_adhesion	3	2662264	Tritonibacter litoralis
GCA_002874165.1	22	['SRFAB|Q04747', 'ompA|A0A3B6XXR4', 'HfaB|P27343', 'SRFAA|P27206', 'OmpU|P0C6Q6', 'tpbB|A0A0H2Z7X0', 'ompW|A0A0F4PBB9', 'RbmC|A0A2S1ZSI6', 'Bap1|Q9KQW0', 'HfsD|Q9A5L5', 'HfsG|Q9A5M0', 'HfsE|Q9A5M2', 'HfsH|Q9A5L9', 'SRFAC|Q08787', 'yfiB|Q9I4L6', 'sipW|P54506', 'ChiA|P32823', 'HfsC|Q9A5L8', 'yfiR|Q9I4L4', 'HfsA|Q9A5L6', 'GbpA|C3LW75', 'SRFAD|Q08788']	8	srf_hfacces_chia_yfi_ompu_bap1_rbmc_gbpa	drag-reducing_adhesion_chitinase-production	3	136468	Vibrio lentus
GCA_002874085.1	22	['SRFAB|Q04747', 'ompA|A0A3B6XXR4', 'HfaB|P27343', 'SRFAA|P27206', 'OmpU|P0C6Q6', 'tpbB|A0A0H2Z7X0', 'ompW|A0A0F4PBB9', 'RbmC|A0A2S1ZSI6', 'Bap1|Q9KQW0', 'HfsD|Q9A5L5', 'HfsG|Q9A5M0', 'HfsE|Q9A5M2', 'HfsH|Q9A5L9', 'SRFAC|Q08787', 'yfiB|Q9I4L6', 'sipW|P54506', 'ChiA|P32823', 'HfsC|Q9A5L8', 'yfiR|Q9I4L4', 'HfsA|Q9A5L6', 'GbpA|C3LW75', 'SRFAD|Q08788']	8	srf_hfacces_chia_yfi_ompu_bap1_rbmc_gbpa	drag-reducing_adhesion_chitinase-production	3	136468	Vibrio lentus
GCA_002878635.1	24	['CHPC|Q9AD93', 'ompA|A0A3B6XXR4', 'CHPE|Q9X9Z2', 'HfaB|P27343', 'OmpU|P0C6Q6', 'tpbB|A0A0H2Z7X0', 'ompW|A0A0F4PBB9', 'CHPG|Q9KYH3', 'CHPA|Q8CJY7', 'HfsD|Q9A5L5', 'HfsG|Q9A5M0', 'HfsH|Q9A5L9', 'yfiB|Q9I4L6', 'CHPF|Q9KYG7', 'CHPH|Q9AD92', 'sipW|P54506', 'ChiA|P32823', 'HfsC|Q9A5L8', 'yfiR|Q9I4L4', 'HfsA|Q9A5L6', 'CHPB|Q9X7U2', 'CHPD|Q9L1J9', 'GbpA|C3LW75', 'SRFAD|Q08788']	6	hfacces_chp_chia_yfi_ompu_gbpa	adhesion_drag-reducing_chitinase-production	3	136468	Vibrio lentus
GCA_005116575.1	18	['HfsD|Q9A5L5', 'OmpU|P0C6Q6', 'HfsF|Q9A5M1', 'HfsE|Q9A5M2', 'HfsG|Q9A5M0', 'HfsH|Q9A5L9', 'sdrC|A0A6A8FED6', 'yfiB|Q9I4L6', 'Hydrophobin_1|P52754', 'ompW|A0A0F4PBB9', 'sipW|P54506', 'ChiA|P32823', 'HfsC|Q9A5L8', 'yfiR|Q9I4L4', 'HfaB|P27343', 'HfsA|Q9A5L6', 'SRFAD|Q08788', 'Trihydrophobin|Q9UVI4']	6	hfs_hfacces_hyd_chia_ompu_sdrc	adhesion_drag-reducing_chitinase-production	3	2569543	Desulforhopalus sp. IMCC35007
GCA_002872955.1	24	['CHPC|Q9AD93', 'ompA|A0A3B6XXR4', 'CHPE|Q9X9Z2', 'HfaB|P27343', 'OmpU|P0C6Q6', 'tpbB|A0A0H2Z7X0', 'ompW|A0A0F4PBB9', 'CHPG|Q9KYH3', 'CHPA|Q8CJY7', 'HfsD|Q9A5L5', 'HfsG|Q9A5M0', 'HfsH|Q9A5L9', 'yfiB|Q9I4L6', 'CHPF|Q9KYG7', 'CHPH|Q9AD92', 'sipW|P54506', 'ChiA|P32823', 'HfsC|Q9A5L8', 'yfiR|Q9I4L4', 'HfsA|Q9A5L6', 'CHPB|Q9X7U2', 'CHPD|Q9L1J9', 'GbpA|C3LW75', 'SRFAD|Q08788']	6	hfacces_chp_chia_yfi_ompu_gbpa	adhesion_drag-reducing_chitinase-production	3	136468	Vibrio lentus
GCA_002686015.1	17	['SRFAA|P27206', 'SRFAB|Q04747', 'HfsD|Q9A5L5', 'OmpU|P0C6Q6', 'HfsF|Q9A5M1', 'HfsG|Q9A5M0', 'HfsH|Q9A5L9', 'tpbB|A0A0H2Z7X0', 'sdrC|A0A6A8FED6', 'ompA|A0A3B6XXR4', 'SRFAC|Q08787', 'yfiB|Q9I4L6', 'sipW|P54506', 'RbmC|A0A2S1ZSI6', 'ChiA|P32823', 'Bap1|Q9KQW0', 'SRFAD|Q08788']	6	srf_chia_ompu_sdrc_bap1_rbmc	drag-reducing_chitinase-production_adhesion	3	2024893	Acidiferrobacteraceae bacterium
GCA_002702705.1	17	['SRFAA|P27206', 'SRFAB|Q04747', 'HfsD|Q9A5L5', 'HfsF|Q9A5M1', 'HfsE|Q9A5M2', 'HfsG|Q9A5M0', 'HfsH|Q9A5L9', 'tpbB|A0A0H2Z7X0', 'sdrC|A0A6A8FED6', 'SRFAC|Q08787', 'ompA|A0A3B6XXR4', 'yfiB|Q9I4L6', 'sipW|P54506', 'ChiA|P32823', 'HfsC|Q9A5L8', 'HfsA|Q9A5L6', 'SRFAD|Q08788']	4	srf_hfs_chia_sdrc	drag-reducing_adhesion_chitinase-production	3	2024896	Anaerolineaceae bacterium
GCA_000024465.1	23	['CHPC|Q9AD93', 'Foo1|A1X158', 'CHPE|Q9X9Z2', 'HfaB|P27343', 'OmpU|P0C6Q6', 'tpbB|A0A0H2Z7X0', 'CHPG|Q9KYH3', 'RbmC|A0A2S1ZSI6', 'Bap1|Q9KQW0', 'CHPA|Q8CJY7', 'HfsD|Q9A5L5', 'HfsF|Q9A5M1', 'HfsG|Q9A5M0', 'HfsH|Q9A5L9', 'yfiB|Q9I4L6', 'CHPF|Q9KYG7', 'CHPH|Q9AD92', 'sipW|P54506', 'ChiA|P32823', 'HfsC|Q9A5L8', 'CHPB|Q9X7U2', 'CHPD|Q9L1J9', 'SRFAD|Q08788']	7	hfacces_chp_foo_chia_ompu_bap1_rbmc	adhesion_drag-reducing_chitinase-production	3	488538	Candidatus Puniceispirillum marinum
GCA_000464435.1	21	['SRFAB|Q04747', 'ompA|A0A3B6XXR4', 'HfaB|P27343', 'SRFAA|P27206', 'OmpU|P0C6Q6', 'tpbB|A0A0H2Z7X0', 'ompW|A0A0F4PBB9', 'HfsD|Q9A5L5', 'HfsF|Q9A5M1', 'HfsE|Q9A5M2', 'HfsG|Q9A5M0', 'HfsH|Q9A5L9', 'SRFAC|Q08787', 'yfiB|Q9I4L6', 'sipW|P54506', 'ChiA|P32823', 'HfsC|Q9A5L8', 'yfiR|Q9I4L4', 'HfsA|Q9A5L6', 'GbpA|C3LW75', 'SRFAD|Q08788']	7	srf_hfs_hfacces_chia_yfi_ompu_gbpa	drag-reducing_adhesion_chitinase-production	3	1224742	Vibrio campbellii
GCA_001767235.1	16	['SRFAA|P27206', 'SRFAB|Q04747', 'HfsD|Q9A5L5', 'HfsF|Q9A5M1', 'HfsG|Q9A5M0', 'HfsH|Q9A5L9', 'sdrC|A0A6A8FED6', 'SRFAC|Q08787', 'yfiB|Q9I4L6', 'sipW|P54506', 'RbmC|A0A2S1ZSI6', 'ChiA|P32823', 'HfsC|Q9A5L8', 'HfsA|Q9A5L6', 'Bap1|Q9KQW0', 'SRFAD|Q08788']	5	srf_chia_sdrc_bap1_rbmc	drag-reducing_chitinase-production_adhesion	3	1458985	Moorena producens
GCA_014490785.1	21	['SRFAB|Q04747', 'ompA|A0A3B6XXR4', 'SRFAA|P27206', 'OmpU|P0C6Q6', 'ompW|A0A0F4PBB9', 'RbmC|A0A2S1ZSI6', 'Bap1|Q9KQW0', 'HfsD|Q9A5L5', 'HfsF|Q9A5M1', 'HfsE|Q9A5M2', 'HfsG|Q9A5M0', 'HfsH|Q9A5L9', 'SRFAC|Q08787', 'yfiB|Q9I4L6', 'sipW|P54506', 'ChiA|P32823', 'HfsC|Q9A5L8', 'HfsA|Q9A5L6', 'sdrC|A0A6A8FED6', 'GbpA|C3LW75', 'SRFAD|Q08788']	8	srf_hfs_chia_ompu_sdrc_bap1_rbmc_gbpa	drag-reducing_adhesion_chitinase-production	3	2725560	Kosakonia sp. SMBL-WEM22
GCA_002709065.1	19	['SRFAB|Q04747', 'Foo1|A1X158', 'SRFAA|P27206', 'OmpU|P0C6Q6', 'tpbB|A0A0H2Z7X0', 'ompW|A0A0F4PBB9', 'RbmC|A0A2S1ZSI6', 'Bap1|Q9KQW0', 'HfsD|Q9A5L5', 'HfsG|Q9A5M0', 'HfsE|Q9A5M2', 'HfsH|Q9A5L9', 'SRFAC|Q08787', 'yfiB|Q9I4L6', 'sipW|P54506', 'ChiA|P32823', 'HfsC|Q9A5L8', 'HfsA|Q9A5L6', 'SRFAD|Q08788']	6	srf_foo_chia_ompu_bap1_rbmc	drag-reducing_adhesion_chitinase-production	3	2024861	Tistrella sp.
GCA_000364845.1	19	['SRFAB|Q04747', 'ompA|A0A3B6XXR4', 'SRFAA|P27206', 'OmpU|P0C6Q6', 'ompW|A0A0F4PBB9', 'RbmC|A0A2S1ZSI6', 'Bap1|Q9KQW0', 'HfsD|Q9A5L5', 'HfsF|Q9A5M1', 'HfsE|Q9A5M2', 'HfsG|Q9A5M0', 'HfsH|Q9A5L9', 'SRFAC|Q08787', 'yfiB|Q9I4L6', 'sipW|P54506', 'ChiA|P32823', 'HfsC|Q9A5L8', 'HfsA|Q9A5L6', 'SRFAD|Q08788']	6	srf_hfs_chia_ompu_bap1_rbmc	drag-reducing_adhesion_chitinase-production	3	626887	Marinobacter nanhaiticus
GCA_002872855.1	24	['CHPC|Q9AD93', 'ompA|A0A3B6XXR4', 'CHPE|Q9X9Z2', 'HfaB|P27343', 'OmpU|P0C6Q6', 'tpbB|A0A0H2Z7X0', 'ompW|A0A0F4PBB9', 'CHPG|Q9KYH3', 'CHPA|Q8CJY7', 'HfsD|Q9A5L5', 'HfsG|Q9A5M0', 'HfsH|Q9A5L9', 'yfiB|Q9I4L6', 'CHPF|Q9KYG7', 'CHPH|Q9AD92', 'sipW|P54506', 'ChiA|P32823', 'HfsC|Q9A5L8', 'yfiR|Q9I4L4', 'HfsA|Q9A5L6', 'CHPB|Q9X7U2', 'CHPD|Q9L1J9', 'GbpA|C3LW75', 'SRFAD|Q08788']	6	hfacces_chp_chia_yfi_ompu_gbpa	adhesion_drag-reducing_chitinase-production	3	136468	Vibrio lentus
GCA_001857985.1	20	['SRFAB|Q04747', 'bslA|P71014', 'Foo1|A1X158', 'ompA|A0A3B6XXR4', 'SRFAA|P27206', 'bslB|P39632', 'HfsD|Q9A5L5', 'HfsF|Q9A5M1', 'HfsG|Q9A5M0', 'HfsH|Q9A5L9', 'tasA|P54507', 'SRFAC|Q08787', 'yfiB|Q9I4L6', 'sipW|P54506', 'ChiA|P32823', 'HfsC|Q9A5L8', 'HfsA|Q9A5L6', 'sdrC|A0A6A8FED6', 'GbpA|C3LW75', 'SRFAD|Q08788']	7	bsl_srf_foo_chia_tapA_sdrc_gbpa	drag-reducing_adhesion_chitinase-production	3	492670	Bacillus velezensis
GCA_002876065.1	24	['CHPC|Q9AD93', 'ompA|A0A3B6XXR4', 'CHPE|Q9X9Z2', 'HfaB|P27343', 'OmpU|P0C6Q6', 'tpbB|A0A0H2Z7X0', 'ompW|A0A0F4PBB9', 'CHPG|Q9KYH3', 'CHPA|Q8CJY7', 'HfsD|Q9A5L5', 'HfsG|Q9A5M0', 'HfsH|Q9A5L9', 'yfiB|Q9I4L6', 'CHPF|Q9KYG7', 'CHPH|Q9AD92', 'sipW|P54506', 'ChiA|P32823', 'HfsC|Q9A5L8', 'yfiR|Q9I4L4', 'HfsA|Q9A5L6', 'CHPB|Q9X7U2', 'CHPD|Q9L1J9', 'GbpA|C3LW75', 'SRFAD|Q08788']	6	hfacces_chp_chia_yfi_ompu_gbpa	adhesion_drag-reducing_chitinase-production	3	136468	Vibrio lentus
GCA_001303045.1	17	['SRFAA|P27206', 'SRFAB|Q04747', 'HfsD|Q9A5L5', 'OmpU|P0C6Q6', 'HfsF|Q9A5M1', 'HfsE|Q9A5M2', 'HfsG|Q9A5M0', 'HfsH|Q9A5L9', 'sdrC|A0A6A8FED6', 'SRFAC|Q08787', 'yfiB|Q9I4L6', 'ompW|A0A0F4PBB9', 'sipW|P54506', 'ChiA|P32823', 'HfaB|P27343', 'HfsA|Q9A5L6', 'SRFAD|Q08788']	5	srf_hfacces_chia_ompu_sdrc	drag-reducing_adhesion_chitinase-production	3	1703402	Gammaproteobacteria bacterium SG8_11
GCA_900188295.1	16	['bslA|P71014', 'HfsD|Q9A5L5', 'OmpU|P0C6Q6', 'HfsF|Q9A5M1', 'HfsE|Q9A5M2', 'bslB|P39632', 'HfsG|Q9A5M0', 'HfsH|Q9A5L9', 'sdrC|A0A6A8FED6', 'yfiB|Q9I4L6', 'sipW|P54506', 'RbmC|A0A2S1ZSI6', 'ChiA|P32823', 'HfsA|Q9A5L6', 'Bap1|Q9KQW0', 'SRFAD|Q08788']	6	bsl_chia_ompu_sdrc_bap1_rbmc	drag-reducing_chitinase-production_adhesion	3	1214787	Paracoccus sediminis
GCA_002693615.1	13	['SRFAA|P27206', 'SRFAB|Q04747', 'HfsD|Q9A5L5', 'HfsG|Q9A5M0', 'HfsE|Q9A5M2', 'HfsH|Q9A5L9', 'sdrC|A0A6A8FED6', 'SRFAC|Q08787', 'sipW|P54506', 'ChiA|P32823', 'HfsC|Q9A5L8', 'HfsA|Q9A5L6', 'SRFAD|Q08788']	3	srf_chia_sdrc	drag-reducing_chitinase-production_adhesion	3	35761	Nocardioides sp.
GCA_014076915.1	21	['SRFAB|Q04747', 'Foo1|A1X158', 'HfaB|P27343', 'SRFAA|P27206', 'OmpU|P0C6Q6', 'ompW|A0A0F4PBB9', 'pilF|A0A290TXQ9', 'HfsD|Q9A5L5', 'HfsF|Q9A5M1', 'HfsG|Q9A5M0', 'HfsH|Q9A5L9', 'SRFAC|Q08787', 'yfiB|Q9I4L6', 'sipW|P54506', 'ChiA|P32823', 'HfsC|Q9A5L8', 'yfiR|Q9I4L4', 'HfsA|Q9A5L6', 'sdrC|A0A6A8FED6', 'GbpA|C3LW75', 'SRFAD|Q08788']	7	srf_hfacces_foo_chia_ompu_sdrc_gbpa	drag-reducing_adhesion_chitinase-production	3	2759815	Colwellia sp. MB02u-14
GCA_014076845.1	21	['SRFAB|Q04747', 'Foo1|A1X158', 'HfaB|P27343', 'SRFAA|P27206', 'OmpU|P0C6Q6', 'ompW|A0A0F4PBB9', 'pilF|A0A290TXQ9', 'HfsD|Q9A5L5', 'HfsF|Q9A5M1', 'HfsG|Q9A5M0', 'HfsH|Q9A5L9', 'SRFAC|Q08787', 'yfiB|Q9I4L6', 'sipW|P54506', 'ChiA|P32823', 'HfsC|Q9A5L8', 'yfiR|Q9I4L4', 'HfsA|Q9A5L6', 'sdrC|A0A6A8FED6', 'GbpA|C3LW75', 'SRFAD|Q08788']	7	srf_hfacces_foo_chia_ompu_sdrc_gbpa	drag-reducing_adhesion_chitinase-production	3	2759811	Colwellia sp. MB3u-41
GCA_000300005.1	16	['SRFAA|P27206', 'SRFAB|Q04747', 'HfsD|Q9A5L5', 'OmpU|P0C6Q6', 'HfsG|Q9A5M0', 'HfsH|Q9A5L9', 'ompA|A0A3B6XXR4', 'SRFAC|Q08787', 'yfiB|Q9I4L6', 'ompW|A0A0F4PBB9', 'sipW|P54506', 'ChiA|P32823', 'HfsC|Q9A5L8', 'HfaB|P27343', 'HfsA|Q9A5L6', 'SRFAD|Q08788']	4	srf_hfacces_chia_ompu	drag-reducing_adhesion_chitinase-production	3	930169	Alcanivorax dieselolei
GCA_002874115.1	27	['SRFAB|Q04747', 'CHPC|Q9AD93', 'ompA|A0A3B6XXR4', 'CHPE|Q9X9Z2', 'HfaB|P27343', 'SRFAA|P27206', 'OmpU|P0C6Q6', 'tpbB|A0A0H2Z7X0', 'ompW|A0A0F4PBB9', 'CHPG|Q9KYH3', 'CHPA|Q8CJY7', 'HfsD|Q9A5L5', 'HfsG|Q9A5M0', 'HfsH|Q9A5L9', 'SRFAC|Q08787', 'yfiB|Q9I4L6', 'CHPF|Q9KYG7', 'CHPH|Q9AD92', 'sipW|P54506', 'ChiA|P32823', 'HfsC|Q9A5L8', 'yfiR|Q9I4L4', 'HfsA|Q9A5L6', 'CHPB|Q9X7U2', 'CHPD|Q9L1J9', 'GbpA|C3…	7	srf_hfacces_chp_chia_yfi_ompu_gbpa	drag-reducing_adhesion_chitinase-production	3	136468	Vibrio lentus
GCA_001634855.1	18	['SRFAA|P27206', 'SRFAB|Q04747', 'HfsD|Q9A5L5', 'OmpU|P0C6Q6', 'HfsF|Q9A5M1', 'HfsE|Q9A5M2', 'HfsG|Q9A5M0', 'sdrC|A0A6A8FED6', 'ompA|A0A3B6XXR4', 'SRFAC|Q08787', 'yfiB|Q9I4L6', 'ompW|A0A0F4PBB9', 'sipW|P54506', 'ChiA|P32823', 'HfsC|Q9A5L8', 'HfaB|P27343', 'HfsA|Q9A5L6', 'SRFAD|Q08788']	5	srf_hfacces_chia_ompu_sdrc	drag-reducing_adhesion_chitinase-production	3	1822229	Alcanivorax sp. HI0035
GCA_001707825.1	18	['SRFAA|P27206', 'SRFAB|Q04747', 'HfsD|Q9A5L5', 'OmpU|P0C6Q6', 'HfsG|Q9A5M0', 'HfsH|Q9A5L9', 'ompA|A0A3B6XXR4', 'tpbB|A0A0H2Z7X0', 'SRFAC|Q08787', 'yfiB|Q9I4L6', 'ompW|A0A0F4PBB9', 'GbpA|C3LW75', 'sipW|P54506', 'ChiA|P32823', 'HfsC|Q9A5L8', 'HfaB|P27343', 'HfsA|Q9A5L6', 'SRFAD|Q08788']	5	srf_hfacces_chia_ompu_gbpa	drag-reducing_adhesion_chitinase-production	3	1080227	Enterovibrio pacificus
GCA_002875715.1	24	['CHPC|Q9AD93', 'ompA|A0A3B6XXR4', 'CHPE|Q9X9Z2', 'HfaB|P27343', 'OmpU|P0C6Q6', 'tpbB|A0A0H2Z7X0', 'ompW|A0A0F4PBB9', 'CHPG|Q9KYH3', 'CHPA|Q8CJY7', 'HfsD|Q9A5L5', 'HfsG|Q9A5M0', 'HfsH|Q9A5L9', 'yfiB|Q9I4L6', 'CHPF|Q9KYG7', 'CHPH|Q9AD92', 'sipW|P54506', 'ChiA|P32823', 'HfsC|Q9A5L8', 'yfiR|Q9I4L4', 'HfsA|Q9A5L6', 'CHPB|Q9X7U2', 'CHPD|Q9L1J9', 'GbpA|C3LW75', 'SRFAD|Q08788']	6	hfacces_chp_chia_yfi_ompu_gbpa	adhesion_drag-reducing_chitinase-production	3	136468	Vibrio lentus
GCA_001691055.1	20	['ompA|A0A3B6XXR4', 'HfaB|P27343', 'OmpU|P0C6Q6', 'tpbB|A0A0H2Z7X0', 'RbmC|A0A2S1ZSI6', 'Bap1|Q9KQW0', 'HfsD|Q9A5L5', 'HfsF|Q9A5M1', 'HfsE|Q9A5M2', 'HfsH|Q9A5L9', 'HfsG|Q9A5M0', 'GalL|C0HLX7', 'yfiB|Q9I4L6', 'sipW|P54506', 'ChiA|P32823', 'HfsC|Q9A5L8', 'yfiR|Q9I4L4', 'HfsA|Q9A5L6', 'GbpA|C3LW75', 'SRFAD|Q08788']	9	hfs_hfacces_chia_gal_yfi_ompu_bap1_rbmc_gbpa	adhesion_chitinase-production_colonization-resistance	3	688	Aliivibrio logei
GCA_001680025.1	21	['SRFAB|Q04747', 'ompA|A0A3B6XXR4', 'HfaB|P27343', 'SRFAA|P27206', 'OmpU|P0C6Q6', 'ompW|A0A0F4PBB9', 'RbmC|A0A2S1ZSI6', 'Bap1|Q9KQW0', 'HfsD|Q9A5L5', 'HfsF|Q9A5M1', 'HfsE|Q9A5M2', 'HfsG|Q9A5M0', 'HfsH|Q9A5L9', 'SRFAC|Q08787', 'yfiB|Q9I4L6', 'sipW|P54506', 'ChiA|P32823', 'HfsC|Q9A5L8', 'HfsA|Q9A5L6', 'sdrC|A0A6A8FED6', 'SRFAD|Q08788']	8	srf_hfs_hfacces_chia_ompu_sdrc_bap1_rbmc	drag-reducing_adhesion_chitinase-production	3	1219067	Vibrio natriegens
GCA_002721375.1	9	['HfsD|Q9A5L5', 'HfsG|Q9A5M0', 'GalL|C0HLX7', 'sdrC|A0A6A8FED6', 'yfiB|Q9I4L6', 'sipW|P54506', 'ChiA|P32823', 'HfsC|Q9A5L8', 'HfsA|Q9A5L6']	3	chia_gal_sdrc	chitinase-production_colonization-resistance_adhesion	3	2026801	Verrucomicrobiales bacterium
GCA_002875965.1	24	['CHPC|Q9AD93', 'ompA|A0A3B6XXR4', 'CHPE|Q9X9Z2', 'HfaB|P27343', 'OmpU|P0C6Q6', 'tpbB|A0A0H2Z7X0', 'ompW|A0A0F4PBB9', 'CHPG|Q9KYH3', 'CHPA|Q8CJY7', 'HfsD|Q9A5L5', 'HfsG|Q9A5M0', 'HfsH|Q9A5L9', 'yfiB|Q9I4L6', 'CHPF|Q9KYG7', 'CHPH|Q9AD92', 'sipW|P54506', 'ChiA|P32823', 'HfsC|Q9A5L8', 'yfiR|Q9I4L4', 'HfsA|Q9A5L6', 'CHPB|Q9X7U2', 'CHPD|Q9L1J9', 'GbpA|C3LW75', 'SRFAD|Q08788']	6	hfacces_chp_chia_yfi_ompu_gbpa	adhesion_drag-reducing_chitinase-production	3	136468	Vibrio lentus
GCA_011040495.1	13	['SRFAA|P27206', 'SRFAB|Q04747', 'HfsD|Q9A5L5', 'OmpU|P0C6Q6', 'HfsF|Q9A5M1', 'HfsG|Q9A5M0', 'HfsH|Q9A5L9', 'SRFAC|Q08787', 'yfiB|Q9I4L6', 'sipW|P54506', 'ChiA|P32823', 'HfsA|Q9A5L6', 'SRFAD|Q08788']	3	srf_chia_ompu	drag-reducing_chitinase-production_adhesion	3	1591409	Pseudohalocynthiibacter aestuariivivens
GCA_001999205.1	22	['SRFAB|Q04747', 'bslA|P71014', 'Foo1|A1X158', 'ompA|A0A3B6XXR4', 'SRFAA|P27206', 'bslB|P39632', 'RbmC|A0A2S1ZSI6', 'Bap1|Q9KQW0', 'HfsD|Q9A5L5', 'HfsF|Q9A5M1', 'HfsG|Q9A5M0', 'HfsH|Q9A5L9', 'tasA|P54507', 'SRFAC|Q08787', 'yfiB|Q9I4L6', 'sipW|P54506', 'ChiA|P32823', 'HfsC|Q9A5L8', 'HfsA|Q9A5L6', 'sdrC|A0A6A8FED6', 'GbpA|C3LW75', 'SRFAD|Q08788']	9	bsl_srf_foo_chia_tapA_sdrc_bap1_rbmc_gbpa	drag-reducing_adhesion_chitinase-production	3	1941347	Bacillus sp. 275
GCA_002715525.1	14	['HfsD|Q9A5L5', 'HfsG|Q9A5M0', 'HfsE|Q9A5M2', 'HfsH|Q9A5L9', 'GalL|C0HLX7', 'tpbB|A0A0H2Z7X0', 'sdrC|A0A6A8FED6', 'yfiB|Q9I4L6', 'sipW|P54506', 'ChiA|P32823', 'HfsC|Q9A5L8', 'HfaB|P27343', 'HfsA|Q9A5L6', 'SRFAD|Q08788']	4	hfacces_chia_gal_sdrc	adhesion_chitinase-production_colonization-resistance	3	2024847	Owenweeksia sp.
GCA_002877535.1	28	['SRFAB|Q04747', 'CHPC|Q9AD93', 'ompA|A0A3B6XXR4', 'CHPE|Q9X9Z2', 'HfaB|P27343', 'SRFAA|P27206', 'OmpU|P0C6Q6', 'tpbB|A0A0H2Z7X0', 'ompW|A0A0F4PBB9', 'CHPG|Q9KYH3', 'RbmC|A0A2S1ZSI6', 'Bap1|Q9KQW0', 'CHPA|Q8CJY7', 'HfsD|Q9A5L5', 'HfsG|Q9A5M0', 'HfsH|Q9A5L9', 'SRFAC|Q08787', 'yfiB|Q9I4L6', 'CHPF|Q9KYG7', 'CHPH|Q9AD92', 'sipW|P54506', 'ChiA|P32823', 'HfsC|Q9A5L8', 'HfsA|Q9A5L6', 'CHPB|Q9X7U2', 'CHP…	8	srf_hfacces_chp_chia_ompu_bap1_rbmc_gbpa	drag-reducing_adhesion_chitinase-production	3	136468	Vibrio lentus
GCA_014164235.1	23	['SRFAB|Q04747', 'Foo1|A1X158', 'ompA|A0A3B6XXR4', 'HfaB|P27343', 'SRFAA|P27206', 'OmpU|P0C6Q6', 'ompW|A0A0F4PBB9', 'pilF|A0A290TXQ9', 'HfsD|Q9A5L5', 'HfsF|Q9A5M1', 'HfsE|Q9A5M2', 'HfsG|Q9A5M0', 'HfsH|Q9A5L9', 'SRFAC|Q08787', 'yfiB|Q9I4L6', 'sipW|P54506', 'ChiA|P32823', 'HfsC|Q9A5L8', 'yfiR|Q9I4L4', 'HfsA|Q9A5L6', 'sdrC|A0A6A8FED6', 'GbpA|C3LW75', 'SRFAD|Q08788']	9	srf_hfs_hfacces_foo_chia_omp_ompu_sdrc_gbpa	drag-reducing_adhesion_chitinase-production	3	2760963	Pseudoalteromonas sp. SG44-17
GCA_001661675.2	16	['SRFAA|P27206', 'SRFAB|Q04747', 'HfsD|Q9A5L5', 'OmpU|P0C6Q6', 'HfsF|Q9A5M1', 'HfsE|Q9A5M2', 'HfsG|Q9A5M0', 'ompA|A0A3B6XXR4', 'SRFAC|Q08787', 'yfiB|Q9I4L6', 'ompW|A0A0F4PBB9', 'sipW|P54506', 'ChiA|P32823', 'HfsC|Q9A5L8', 'HfsA|Q9A5L6', 'SRFAD|Q08788']	3	srf_chia_ompu	drag-reducing_chitinase-production_adhesion	3	450378	Croceicoccus marinus
GCA_001625595.1	19	['SRFAB|Q04747', 'Foo1|A1X158', 'ompA|A0A3B6XXR4', 'HfaB|P27343', 'SRFAA|P27206', 'OmpU|P0C6Q6', 'ompW|A0A0F4PBB9', 'HfsD|Q9A5L5', 'HfsG|Q9A5M0', 'HfsH|Q9A5L9', 'SRFAC|Q08787', 'yfiB|Q9I4L6', 'sipW|P54506', 'ChiA|P32823', 'HfsC|Q9A5L8', 'yfiR|Q9I4L4', 'HfsA|Q9A5L6', 'GbpA|C3LW75', 'SRFAD|Q08788']	6	srf_hfacces_foo_chia_ompu_gbpa	drag-reducing_adhesion_chitinase-production	3	1365253	Pseudoalteromonas luteoviolacea
GCA_002876285.1	24	['CHPC|Q9AD93', 'ompA|A0A3B6XXR4', 'CHPE|Q9X9Z2', 'HfaB|P27343', 'OmpU|P0C6Q6', 'tpbB|A0A0H2Z7X0', 'ompW|A0A0F4PBB9', 'CHPG|Q9KYH3', 'CHPA|Q8CJY7', 'HfsD|Q9A5L5', 'HfsG|Q9A5M0', 'HfsH|Q9A5L9', 'yfiB|Q9I4L6', 'CHPF|Q9KYG7', 'CHPH|Q9AD92', 'sipW|P54506', 'ChiA|P32823', 'HfsC|Q9A5L8', 'yfiR|Q9I4L4', 'HfsA|Q9A5L6', 'CHPB|Q9X7U2', 'CHPD|Q9L1J9', 'GbpA|C3LW75', 'SRFAD|Q08788']	6	hfacces_chp_chia_yfi_ompu_gbpa	adhesion_drag-reducing_chitinase-production	3	136468	Vibrio lentus
GCA_003312585.1	19	['SRFAB|Q04747', 'ompA|A0A3B6XXR4', 'HfaB|P27343', 'SRFAA|P27206', 'OmpU|P0C6Q6', 'tpbB|A0A0H2Z7X0', 'ompW|A0A0F4PBB9', 'HfsD|Q9A5L5', 'HfsG|Q9A5M0', 'HfsE|Q9A5M2', 'HfsH|Q9A5L9', 'SRFAC|Q08787', 'yfiB|Q9I4L6', 'sipW|P54506', 'ChiA|P32823', 'HfsC|Q9A5L8', 'HfsA|Q9A5L6', 'GbpA|C3LW75', 'SRFAD|Q08788']	5	srf_hfacces_chia_ompu_gbpa	drag-reducing_adhesion_chitinase-production	3	1088888	Vibrio campbellii
GCA_000304635.1	17	['SRFAA|P27206', 'SRFAB|Q04747', 'HfsD|Q9A5L5', 'HfsF|Q9A5M1', 'HfsE|Q9A5M2', 'HfsG|Q9A5M0', 'HfsH|Q9A5L9', 'sdrC|A0A6A8FED6', 'ompA|A0A3B6XXR4', 'SRFAC|Q08787', 'yfiB|Q9I4L6', 'sipW|P54506', 'ChiA|P32823', 'HfsC|Q9A5L8', 'HfaB|P27343', 'HfsA|Q9A5L6', 'SRFAD|Q08788']	5	srf_hfs_hfacces_chia_sdrc	drag-reducing_adhesion_chitinase-production	3	993517	Rhodopirellula baltica
GCA_020147905.1	24	['SRFAB|Q04747', 'ompA|A0A3B6XXR4', 'HfaB|P27343', 'SRFAA|P27206', 'OmpU|P0C6Q6', 'tpbB|A0A0H2Z7X0', 'ompW|A0A0F4PBB9', 'RbmC|A0A2S1ZSI6', 'Bap1|Q9KQW0', 'HfsD|Q9A5L5', 'HfsF|Q9A5M1', 'HfsE|Q9A5M2', 'HfsG|Q9A5M0', 'HfsH|Q9A5L9', 'SRFAC|Q08787', 'yfiB|Q9I4L6', 'sipW|P54506', 'ChiA|P32823', 'HfsC|Q9A5L8', 'yfiR|Q9I4L4', 'HfsA|Q9A5L6', 'sdrC|A0A6A8FED6', 'GbpA|C3LW75', 'SRFAD|Q08788']	10	srf_hfs_hfacces_chia_yfi_ompu_sdrc_bap1_rbmc_gbpa	drag-reducing_adhesion_chitinase-production	3	287	Pseudomonas aeruginosa
GCA_015207455.1	18	['SRFAA|P27206', 'SRFAB|Q04747', 'HfsD|Q9A5L5', 'HfsF|Q9A5M1', 'HfsE|Q9A5M2', 'HfsG|Q9A5M0', 'HfsH|Q9A5L9', 'sdrC|A0A6A8FED6', 'SRFAC|Q08787', 'yfiB|Q9I4L6', 'sipW|P54506', 'RbmC|A0A2S1ZSI6', 'ChiA|P32823', 'HfsC|Q9A5L8', 'HfaB|P27343', 'HfsA|Q9A5L6', 'Bap1|Q9KQW0', 'SRFAD|Q08788']	7	srf_hfs_hfacces_chia_sdrc_bap1_rbmc	drag-reducing_adhesion_chitinase-production	3	915322	Microcoleus sp. LEGE 07076
GCA_000974945.1	21	['SRFAB|Q04747', 'Foo1|A1X158', 'ompA|A0A3B6XXR4', 'HfaB|P27343', 'SRFAA|P27206', 'OmpU|P0C6Q6', 'ompW|A0A0F4PBB9', 'HfsD|Q9A5L5', 'HfsF|Q9A5M1', 'HfsG|Q9A5M0', 'HfsH|Q9A5L9', 'SRFAC|Q08787', 'yfiB|Q9I4L6', 'sipW|P54506', 'ChiA|P32823', 'HfsC|Q9A5L8', 'yfiR|Q9I4L4', 'HfsA|Q9A5L6', 'sdrC|A0A6A8FED6', 'GbpA|C3LW75', 'SRFAD|Q08788']	7	srf_hfacces_foo_chia_ompu_sdrc_gbpa	drag-reducing_adhesion_chitinase-production	3	1129367	Pseudoalteromonas luteoviolacea
GCA_007995015.1	17	['SRFAA|P27206', 'SRFAB|Q04747', 'HfsD|Q9A5L5', 'HfsF|Q9A5M1', 'HfsE|Q9A5M2', 'HfsG|Q9A5M0', 'HfsH|Q9A5L9', 'tpbB|A0A0H2Z7X0', 'sdrC|A0A6A8FED6', 'SRFAC|Q08787', 'yfiB|Q9I4L6', 'sipW|P54506', 'ChiA|P32823', 'HfsC|Q9A5L8', 'yfiR|Q9I4L4', 'HfsA|Q9A5L6', 'SRFAD|Q08788']	5	srf_hfs_chia_yfi_sdrc	drag-reducing_adhesion_chitinase-production	3	1294296	Luteibaculum oceani
GCA_002877485.1	26	['CHPC|Q9AD93', 'ompA|A0A3B6XXR4', 'CHPE|Q9X9Z2', 'HfaB|P27343', 'OmpU|P0C6Q6', 'tpbB|A0A0H2Z7X0', 'ompW|A0A0F4PBB9', 'CHPG|Q9KYH3', 'RbmC|A0A2S1ZSI6', 'Bap1|Q9KQW0', 'CHPA|Q8CJY7', 'HfsD|Q9A5L5', 'HfsG|Q9A5M0', 'HfsH|Q9A5L9', 'yfiB|Q9I4L6', 'CHPF|Q9KYG7', 'CHPH|Q9AD92', 'sipW|P54506', 'ChiA|P32823', 'HfsC|Q9A5L8', 'yfiR|Q9I4L4', 'HfsA|Q9A5L6', 'CHPB|Q9X7U2', 'CHPD|Q9L1J9', 'GbpA|C3LW75', 'SRFAD|…	8	hfacces_chp_chia_yfi_ompu_bap1_rbmc_gbpa	adhesion_drag-reducing_chitinase-production	3	136468	Vibrio lentus
GCA_000695255.1	19	['SRFAB|Q04747', 'ompA|A0A3B6XXR4', 'SRFAA|P27206', 'OmpU|P0C6Q6', 'tpbB|A0A0H2Z7X0', 'HfsD|Q9A5L5', 'HfsF|Q9A5M1', 'HfsE|Q9A5M2', 'HfsG|Q9A5M0', 'HfsH|Q9A5L9', 'SRFAC|Q08787', 'yfiB|Q9I4L6', 'sipW|P54506', 'ChiA|P32823', 'HfsC|Q9A5L8', 'HfsA|Q9A5L6', 'sdrC|A0A6A8FED6', 'GbpA|C3LW75', 'SRFAD|Q08788']	6	srf_hfs_chia_ompu_sdrc_gbpa	drag-reducing_adhesion_chitinase-production	3	1654360	Photobacterium galatheae
GCA_014076795.1	21	['SRFAB|Q04747', 'Foo1|A1X158', 'HfaB|P27343', 'SRFAA|P27206', 'OmpU|P0C6Q6', 'ompW|A0A0F4PBB9', 'pilF|A0A290TXQ9', 'HfsD|Q9A5L5', 'HfsF|Q9A5M1', 'HfsG|Q9A5M0', 'HfsH|Q9A5L9', 'SRFAC|Q08787', 'yfiB|Q9I4L6', 'sipW|P54506', 'ChiA|P32823', 'HfsC|Q9A5L8', 'yfiR|Q9I4L4', 'HfsA|Q9A5L6', 'sdrC|A0A6A8FED6', 'GbpA|C3LW75', 'SRFAD|Q08788']	7	srf_hfacces_foo_chia_ompu_sdrc_gbpa	drag-reducing_adhesion_chitinase-production	3	2759812	Colwellia sp. MB3u-28
GCA_002874515.1	27	['CHPC|Q9AD93', 'ompA|A0A3B6XXR4', 'CHPE|Q9X9Z2', 'HfaB|P27343', 'OmpU|P0C6Q6', 'tpbB|A0A0H2Z7X0', 'ompW|A0A0F4PBB9', 'CHPG|Q9KYH3', 'RbmC|A0A2S1ZSI6', 'Bap1|Q9KQW0', 'CHPA|Q8CJY7', 'HfsD|Q9A5L5', 'HfsG|Q9A5M0', 'HfsE|Q9A5M2', 'HfsH|Q9A5L9', 'yfiB|Q9I4L6', 'CHPF|Q9KYG7', 'CHPH|Q9AD92', 'sipW|P54506', 'ChiA|P32823', 'HfsC|Q9A5L8', 'yfiR|Q9I4L4', 'HfsA|Q9A5L6', 'CHPB|Q9X7U2', 'CHPD|Q9L1J9', 'GbpA|C…	8	hfacces_chp_chia_yfi_ompu_bap1_rbmc_gbpa	adhesion_drag-reducing_chitinase-production	3	136468	Vibrio lentus
GCA_002762595.1	22	['SRFAB|Q04747', 'ompA|A0A3B6XXR4', 'SRFAA|P27206', 'OmpU|P0C6Q6', 'tpbB|A0A0H2Z7X0', 'ompW|A0A0F4PBB9', 'RbmC|A0A2S1ZSI6', 'Bap1|Q9KQW0', 'HfsD|Q9A5L5', 'HfsF|Q9A5M1', 'HfsE|Q9A5M2', 'HfsG|Q9A5M0', 'HfsH|Q9A5L9', 'SRFAC|Q08787', 'yfiB|Q9I4L6', 'sipW|P54506', 'ChiA|P32823', 'HfsC|Q9A5L8', 'yfiR|Q9I4L4', 'HfsA|Q9A5L6', 'GbpA|C3LW75', 'SRFAD|Q08788']	8	srf_hfs_chia_yfi_ompu_bap1_rbmc_gbpa	drag-reducing_adhesion_chitinase-production	3	615	Serratia marcescens
GCA_002874485.1	28	['SRFAB|Q04747', 'CHPC|Q9AD93', 'ompA|A0A3B6XXR4', 'CHPE|Q9X9Z2', 'HfaB|P27343', 'SRFAA|P27206', 'OmpU|P0C6Q6', 'tpbB|A0A0H2Z7X0', 'ompW|A0A0F4PBB9', 'CHPG|Q9KYH3', 'CHPA|Q8CJY7', 'HfsD|Q9A5L5', 'HfsF|Q9A5M1', 'HfsG|Q9A5M0', 'HfsH|Q9A5L9', 'SRFAC|Q08787', 'yfiB|Q9I4L6', 'CHPF|Q9KYG7', 'CHPH|Q9AD92', 'sipW|P54506', 'ChiA|P32823', 'HfsC|Q9A5L8', 'yfiR|Q9I4L4', 'HfsA|Q9A5L6', 'CHPB|Q9X7U2', 'CHPD|Q9…	7	srf_hfacces_chp_chia_yfi_ompu_gbpa	drag-reducing_adhesion_chitinase-production	3	136468	Vibrio lentus
GCA_011009535.1	18	['SRFAA|P27206', 'SRFAB|Q04747', 'HfsD|Q9A5L5', 'Foo1|A1X158', 'HfsF|Q9A5M1', 'HfsE|Q9A5M2', 'HfsG|Q9A5M0', 'HfsH|Q9A5L9', 'sdrC|A0A6A8FED6', 'SRFAC|Q08787', 'yfiB|Q9I4L6', 'sipW|P54506', 'RbmC|A0A2S1ZSI6', 'ChiA|P32823', 'HfsC|Q9A5L8', 'HfsA|Q9A5L6', 'Bap1|Q9KQW0', 'SRFAD|Q08788']	7	srf_hfs_foo_chia_sdrc_bap1_rbmc	drag-reducing_adhesion_chitinase-production	3	2304604	Adonisia turfae
GCA_002698645.1	12	['SRFAA|P27206', 'SRFAB|Q04747', 'OmpU|P0C6Q6', 'HfsF|Q9A5M1', 'HfsG|Q9A5M0', 'SRFAC|Q08787', 'yfiB|Q9I4L6', 'RbmC|A0A2S1ZSI6', 'ChiA|P32823', 'HfsC|Q9A5L8', 'Bap1|Q9KQW0', 'SRFAD|Q08788']	5	srf_chia_ompu_bap1_rbmc	drag-reducing_chitinase-production_adhesion	3	2026754	Legionellales bacterium
GCA_002876845.1	28	['SRFAB|Q04747', 'CHPC|Q9AD93', 'ompA|A0A3B6XXR4', 'CHPE|Q9X9Z2', 'HfaB|P27343', 'SRFAA|P27206', 'OmpU|P0C6Q6', 'tpbB|A0A0H2Z7X0', 'ompW|A0A0F4PBB9', 'CHPG|Q9KYH3', 'CHPA|Q8CJY7', 'HfsD|Q9A5L5', 'HfsF|Q9A5M1', 'HfsG|Q9A5M0', 'HfsH|Q9A5L9', 'SRFAC|Q08787', 'yfiB|Q9I4L6', 'CHPF|Q9KYG7', 'CHPH|Q9AD92', 'sipW|P54506', 'ChiA|P32823', 'HfsC|Q9A5L8', 'yfiR|Q9I4L4', 'HfsA|Q9A5L6', 'CHPB|Q9X7U2', 'CHPD|Q9…	7	srf_hfacces_chp_chia_yfi_ompu_gbpa	drag-reducing_adhesion_chitinase-production	3	136468	Vibrio lentus
GCA_900116575.1	19	['SRFAB|Q04747', 'HfaB|P27343', 'SRFAA|P27206', 'OmpU|P0C6Q6', 'tpbB|A0A0H2Z7X0', 'ompW|A0A0F4PBB9', 'HfsD|Q9A5L5', 'HfsF|Q9A5M1', 'HfsE|Q9A5M2', 'HfsG|Q9A5M0', 'HfsH|Q9A5L9', 'SRFAC|Q08787', 'yfiB|Q9I4L6', 'sipW|P54506', 'ChiA|P32823', 'HfsC|Q9A5L8', 'HfsA|Q9A5L6', 'sdrC|A0A6A8FED6', 'SRFAD|Q08788']	6	srf_hfs_hfacces_chia_ompu_sdrc	drag-reducing_adhesion_chitinase-production	3	258256	Pseudovibrio denitrificans
GCA_000353245.1	16	['SRFAA|P27206', 'SRFAB|Q04747', 'HfsD|Q9A5L5', 'HfsF|Q9A5M1', 'bslB|P39632', 'HfsG|Q9A5M0', 'HfsH|Q9A5L9', 'tasA|P54507', 'SRFAD|Q08788', 'SRFAC|Q08787', 'sdrC|A0A6A8FED6', 'sipW|P54506', 'ChiA|P32823', 'HfsC|Q9A5L8', 'HfsA|Q9A5L6', 'bslA|P71014']	5	bsl_srf_chia_tapA_sdrc	drag-reducing_chitinase-production_adhesion	3	1236481	Bacillus stratosphericus
GCA_000244955.1	16	['SRFAA|P27206', 'SRFAB|Q04747', 'HfsD|Q9A5L5', 'HfsF|Q9A5M1', 'HfsE|Q9A5M2', 'HfsG|Q9A5M0', 'HfsH|Q9A5L9', 'sdrC|A0A6A8FED6', 'ompA|A0A3B6XXR4', 'SRFAC|Q08787', 'yfiB|Q9I4L6', 'sipW|P54506', 'ChiA|P32823', 'HfsC|Q9A5L8', 'HfsA|Q9A5L6', 'SRFAD|Q08788']	4	srf_hfs_chia_sdrc	drag-reducing_adhesion_chitinase-production	3	882083	Saccharomonospora marina
GCA_000152445.1	22	['SRFAB|Q04747', 'ompA|A0A3B6XXR4', 'HfaB|P27343', 'SRFAA|P27206', 'OmpU|P0C6Q6', 'tpbB|A0A0H2Z7X0', 'ompW|A0A0F4PBB9', 'RbmC|A0A2S1ZSI6', 'Bap1|Q9KQW0', 'HfsD|Q9A5L5', 'HfsF|Q9A5M1', 'HfsE|Q9A5M2', 'HfsG|Q9A5M0', 'HfsH|Q9A5L9', 'SRFAC|Q08787', 'yfiB|Q9I4L6', 'sipW|P54506', 'ChiA|P32823', 'HfsC|Q9A5L8', 'HfsA|Q9A5L6', 'GbpA|C3LW75', 'SRFAD|Q08788']	8	srf_hfs_hfacces_chia_ompu_bap1_rbmc_gbpa	drag-reducing_adhesion_chitinase-production	3	345074	Vibrio cholerae
GCA_015207525.1	16	['SRFAA|P27206', 'SRFAB|Q04747', 'HfsD|Q9A5L5', 'HfsF|Q9A5M1', 'HfsE|Q9A5M2', 'HfsG|Q9A5M0', 'HfsH|Q9A5L9', 'tpbB|A0A0H2Z7X0', 'sdrC|A0A6A8FED6', 'SRFAC|Q08787', 'yfiB|Q9I4L6', 'sipW|P54506', 'ChiA|P32823', 'HfsC|Q9A5L8', 'HfsA|Q9A5L6', 'SRFAD|Q08788']	4	srf_hfs_chia_sdrc	drag-reducing_adhesion_chitinase-production	3	2777966	Nodosilinea sp. LEGE 06152
GCA_009901525.1	17	['SRFAA|P27206', 'SRFAB|Q04747', 'HfsD|Q9A5L5', 'OmpU|P0C6Q6', 'HfsF|Q9A5M1', 'HfsE|Q9A5M2', 'HfsG|Q9A5M0', 'HfsH|Q9A5L9', 'sdrC|A0A6A8FED6', 'SRFAC|Q08787', 'yfiB|Q9I4L6', 'ompW|A0A0F4PBB9', 'sipW|P54506', 'ChiA|P32823', 'HfsC|Q9A5L8', 'HfaB|P27343', 'SRFAD|Q08788']	5	srf_hfacces_chia_ompu_sdrc	drag-reducing_adhesion_chitinase-production	3	1218801	Kordia antarctica
GCA_900112265.1	22	['SRFAB|Q04747', 'Foo1|A1X158', 'ompA|A0A3B6XXR4', 'HfaB|P27343', 'SRFAA|P27206', 'OmpU|P0C6Q6', 'ompW|A0A0F4PBB9', 'HfsD|Q9A5L5', 'HfsF|Q9A5M1', 'HfsE|Q9A5M2', 'HfsG|Q9A5M0', 'HfsH|Q9A5L9', 'SRFAC|Q08787', 'yfiB|Q9I4L6', 'sipW|P54506', 'ChiA|P32823', 'HfsC|Q9A5L8', 'yfiR|Q9I4L4', 'HfsA|Q9A5L6', 'sdrC|A0A6A8FED6', 'GbpA|C3LW75', 'SRFAD|Q08788']	8	srf_hfs_hfacces_foo_chia_ompu_sdrc_gbpa	drag-reducing_adhesion_chitinase-production	3	1123010	Pseudoalteromonas denitrificans
GCA_002876405.1	28	['SRFAB|Q04747', 'CHPC|Q9AD93', 'ompA|A0A3B6XXR4', 'CHPE|Q9X9Z2', 'HfaB|P27343', 'SRFAA|P27206', 'OmpU|P0C6Q6', 'tpbB|A0A0H2Z7X0', 'ompW|A0A0F4PBB9', 'CHPG|Q9KYH3', 'CHPA|Q8CJY7', 'HfsD|Q9A5L5', 'HfsF|Q9A5M1', 'HfsG|Q9A5M0', 'HfsH|Q9A5L9', 'SRFAC|Q08787', 'yfiB|Q9I4L6', 'CHPF|Q9KYG7', 'CHPH|Q9AD92', 'sipW|P54506', 'ChiA|P32823', 'HfsC|Q9A5L8', 'yfiR|Q9I4L4', 'HfsA|Q9A5L6', 'CHPB|Q9X7U2', 'CHPD|Q9…	7	srf_hfacces_chp_chia_yfi_ompu_gbpa	drag-reducing_adhesion_chitinase-production	3	136468	Vibrio lentus
GCA_900112515.1	16	['bslA|P71014', 'HfsD|Q9A5L5', 'OmpU|P0C6Q6', 'HfsF|Q9A5M1', 'bslB|P39632', 'HfsG|Q9A5M0', 'HfsH|Q9A5L9', 'tpbB|A0A0H2Z7X0', 'sdrC|A0A6A8FED6', 'yfiB|Q9I4L6', 'ompW|A0A0F4PBB9', 'sipW|P54506', 'ChiA|P32823', 'HfsC|Q9A5L8', 'HfsA|Q9A5L6', 'SRFAD|Q08788']	4	bsl_chia_ompu_sdrc	drag-reducing_chitinase-production_adhesion	3	928856	Tritonibacter multivorans
GCA_002876025.1	26	['CHPC|Q9AD93', 'ompA|A0A3B6XXR4', 'CHPE|Q9X9Z2', 'HfaB|P27343', 'OmpU|P0C6Q6', 'tpbB|A0A0H2Z7X0', 'ompW|A0A0F4PBB9', 'CHPG|Q9KYH3', 'RbmC|A0A2S1ZSI6', 'Bap1|Q9KQW0', 'CHPA|Q8CJY7', 'HfsD|Q9A5L5', 'HfsG|Q9A5M0', 'HfsH|Q9A5L9', 'yfiB|Q9I4L6', 'CHPF|Q9KYG7', 'CHPH|Q9AD92', 'sipW|P54506', 'ChiA|P32823', 'HfsC|Q9A5L8', 'yfiR|Q9I4L4', 'HfsA|Q9A5L6', 'CHPB|Q9X7U2', 'CHPD|Q9L1J9', 'GbpA|C3LW75', 'SRFAD|…	8	hfacces_chp_chia_yfi_ompu_bap1_rbmc_gbpa	adhesion_drag-reducing_chitinase-production	3	136468	Vibrio lentus
GCA_002876255.1	28	['SRFAB|Q04747', 'CHPC|Q9AD93', 'ompA|A0A3B6XXR4', 'CHPE|Q9X9Z2', 'HfaB|P27343', 'SRFAA|P27206', 'OmpU|P0C6Q6', 'tpbB|A0A0H2Z7X0', 'ompW|A0A0F4PBB9', 'CHPG|Q9KYH3', 'RbmC|A0A2S1ZSI6', 'Bap1|Q9KQW0', 'CHPA|Q8CJY7', 'HfsD|Q9A5L5', 'HfsG|Q9A5M0', 'HfsH|Q9A5L9', 'SRFAC|Q08787', 'yfiB|Q9I4L6', 'CHPF|Q9KYG7', 'CHPH|Q9AD92', 'sipW|P54506', 'ChiA|P32823', 'HfsC|Q9A5L8', 'HfsA|Q9A5L6', 'CHPB|Q9X7U2', 'CHP…	8	srf_hfacces_chp_chia_ompu_bap1_rbmc_gbpa	drag-reducing_adhesion_chitinase-production	3	136468	Vibrio lentus
GCA_002689655.1	12	['SRFAA|P27206', 'SRFAB|Q04747', 'HfsF|Q9A5M1', 'HfsG|Q9A5M0', 'HfsH|Q9A5L9', 'sdrC|A0A6A8FED6', 'SRFAC|Q08787', 'yfiB|Q9I4L6', 'sipW|P54506', 'ChiA|P32823', 'HfsC|Q9A5L8', 'SRFAD|Q08788']	3	srf_chia_sdrc	drag-reducing_chitinase-production_adhesion	3	2024855	Rhodopirellula sp.
GCA_002695025.1	16	['HfsD|Q9A5L5', 'OmpU|P0C6Q6', 'HfsG|Q9A5M0', 'HfsE|Q9A5M2', 'HfsH|Q9A5L9', 'GalL|C0HLX7', 'tpbB|A0A0H2Z7X0', 'sdrC|A0A6A8FED6', 'yfiB|Q9I4L6', 'pilF|A0A290TXQ9', 'sipW|P54506', 'ChiA|P32823', 'HfsC|Q9A5L8', 'HfaB|P27343', 'HfsA|Q9A5L6', 'SRFAD|Q08788']	5	hfacces_chia_gal_ompu_sdrc	adhesion_chitinase-production_colonization-resistance	3	2024847	Owenweeksia sp.
GCA_003987355.1	14	['SRFAA|P27206', 'SRFAB|Q04747', 'HfsD|Q9A5L5', 'OmpU|P0C6Q6', 'HfsF|Q9A5M1', 'HfsG|Q9A5M0', 'HfsH|Q9A5L9', 'ompA|A0A3B6XXR4', 'SRFAC|Q08787', 'yfiB|Q9I4L6', 'sipW|P54506', 'ChiA|P32823', 'HfsA|Q9A5L6', 'SRFAD|Q08788']	3	srf_chia_ompu	drag-reducing_chitinase-production_adhesion	3	624146	Pseudidiomarina aestuarii
GCA_002721595.1	16	['HfsD|Q9A5L5', 'Foo1|A1X158', 'HfsG|Q9A5M0', 'HfsH|Q9A5L9', 'GalL|C0HLX7', 'sdrC|A0A6A8FED6', 'ompA|A0A3B6XXR4', 'yfiB|Q9I4L6', 'sipW|P54506', 'RbmC|A0A2S1ZSI6', 'ChiA|P32823', 'HfsC|Q9A5L8', 'HfaB|P27343', 'HfsA|Q9A5L6', 'Bap1|Q9KQW0', 'SRFAD|Q08788']	7	hfacces_foo_chia_gal_sdrc_bap1_rbmc	adhesion_chitinase-production_colonization-resistance	3	1898113	Idiomarinaceae bacterium
GCA_000318075.1	22	['SRFAB|Q04747', 'ompA|A0A3B6XXR4', 'HfaB|P27343', 'SRFAA|P27206', 'OmpU|P0C6Q6', 'tpbB|A0A0H2Z7X0', 'ompW|A0A0F4PBB9', 'RbmC|A0A2S1ZSI6', 'Bap1|Q9KQW0', 'HfsD|Q9A5L5', 'HfsF|Q9A5M1', 'HfsE|Q9A5M2', 'HfsG|Q9A5M0', 'HfsH|Q9A5L9', 'SRFAC|Q08787', 'yfiB|Q9I4L6', 'sipW|P54506', 'ChiA|P32823', 'HfsC|Q9A5L8', 'HfsA|Q9A5L6', 'GbpA|C3LW75', 'SRFAD|Q08788']	8	srf_hfs_hfacces_chia_ompu_bap1_rbmc_gbpa	drag-reducing_adhesion_chitinase-production	3	693743	Vibrio cholerae
GCA_001625705.1	19	['SRFAB|Q04747', 'Foo1|A1X158', 'ompA|A0A3B6XXR4', 'HfaB|P27343', 'SRFAA|P27206', 'OmpU|P0C6Q6', 'ompW|A0A0F4PBB9', 'HfsD|Q9A5L5', 'HfsG|Q9A5M0', 'HfsH|Q9A5L9', 'SRFAC|Q08787', 'yfiB|Q9I4L6', 'sipW|P54506', 'ChiA|P32823', 'HfsC|Q9A5L8', 'yfiR|Q9I4L4', 'HfsA|Q9A5L6', 'GbpA|C3LW75', 'SRFAD|Q08788']	6	srf_hfacces_foo_chia_ompu_gbpa	drag-reducing_adhesion_chitinase-production	3	1365257	Pseudoalteromonas luteoviolacea
GCA_005885635.1	20	['SRFAB|Q04747', 'Foo1|A1X158', 'ompA|A0A3B6XXR4', 'SRFAA|P27206', 'OmpU|P0C6Q6', 'tpbB|A0A0H2Z7X0', 'ompW|A0A0F4PBB9', 'HfsD|Q9A5L5', 'HfsF|Q9A5M1', 'HfsE|Q9A5M2', 'HfsG|Q9A5M0', 'HfsH|Q9A5L9', 'SRFAC|Q08787', 'yfiB|Q9I4L6', 'sipW|P54506', 'ChiA|P32823', 'HfsC|Q9A5L8', 'HfsA|Q9A5L6', 'sdrC|A0A6A8FED6', 'SRFAD|Q08788']	6	srf_hfs_foo_chia_ompu_sdrc	drag-reducing_adhesion_chitinase-production	3	2578118	Maribacter algarum
GCA_001433715.1	24	['SRFAB|Q04747', 'Foo1|A1X158', 'ompA|A0A3B6XXR4', 'HfaB|P27343', 'SRFAA|P27206', 'OmpU|P0C6Q6', 'tpbB|A0A0H2Z7X0', 'ompW|A0A0F4PBB9', 'pilF|A0A290TXQ9', 'HfsD|Q9A5L5', 'HfsF|Q9A5M1', 'HfsE|Q9A5M2', 'HfsG|Q9A5M0', 'HfsH|Q9A5L9', 'SRFAC|Q08787', 'yfiB|Q9I4L6', 'sipW|P54506', 'ChiA|P32823', 'HfsC|Q9A5L8', 'yfiR|Q9I4L4', 'HfsA|Q9A5L6', 'sdrC|A0A6A8FED6', 'GbpA|C3LW75', 'SRFAD|Q08788']	10	srf_hfs_hfacces_foo_chia_omp_yfi_ompu_sdrc_gbpa	drag-reducing_adhesion_chitinase-production	3	1160720	Alteromonas stellipolaris
GCA_002257665.1	17	['SRFAA|P27206', 'SRFAB|Q04747', 'HfsD|Q9A5L5', 'HfsF|Q9A5M1', 'HfsE|Q9A5M2', 'HfsG|Q9A5M0', 'HfsH|Q9A5L9', 'sdrC|A0A6A8FED6', 'ompA|A0A3B6XXR4', 'SRFAC|Q08787', 'yfiB|Q9I4L6', 'sipW|P54506', 'ChiA|P32823', 'HfsC|Q9A5L8', 'HfaB|P27343', 'HfsA|Q9A5L6', 'SRFAD|Q08788']	5	srf_hfs_hfacces_chia_sdrc	drag-reducing_adhesion_chitinase-production	3	716817	Rubricoccus marinus
GCA_002878515.1	20	['SRFAB|Q04747', 'ompA|A0A3B6XXR4', 'HfaB|P27343', 'SRFAA|P27206', 'OmpU|P0C6Q6', 'tpbB|A0A0H2Z7X0', 'ompW|A0A0F4PBB9', 'HfsD|Q9A5L5', 'HfsG|Q9A5M0', 'HfsE|Q9A5M2', 'HfsH|Q9A5L9', 'SRFAC|Q08787', 'yfiB|Q9I4L6', 'sipW|P54506', 'ChiA|P32823', 'HfsC|Q9A5L8', 'yfiR|Q9I4L4', 'HfsA|Q9A5L6', 'GbpA|C3LW75', 'SRFAD|Q08788']	6	srf_hfacces_chia_yfi_ompu_gbpa	drag-reducing_adhesion_chitinase-production	3	136468	Vibrio lentus
GCA_002699205.1	19	['SRFAB|Q04747', 'Foo1|A1X158', 'ompA|A0A3B6XXR4', 'SRFAA|P27206', 'tpbB|A0A0H2Z7X0', 'ompW|A0A0F4PBB9', 'HfsD|Q9A5L5', 'HfsF|Q9A5M1', 'HfsE|Q9A5M2', 'HfsG|Q9A5M0', 'HfsH|Q9A5L9', 'SRFAC|Q08787', 'yfiB|Q9I4L6', 'sipW|P54506', 'ChiA|P32823', 'HfsC|Q9A5L8', 'HfsA|Q9A5L6', 'sdrC|A0A6A8FED6', 'SRFAD|Q08788']	5	srf_hfs_foo_chia_sdrc	drag-reducing_adhesion_chitinase-production	3	192149	Muricauda sp.
GCA_900142175.1	19	['SRFAB|Q04747', 'Foo1|A1X158', 'ompA|A0A3B6XXR4', 'SRFAA|P27206', 'tpbB|A0A0H2Z7X0', 'RbmC|A0A2S1ZSI6', 'Bap1|Q9KQW0', 'HfsD|Q9A5L5', 'HfsF|Q9A5M1', 'HfsE|Q9A5M2', 'HfsG|Q9A5M0', 'SRFAC|Q08787', 'yfiB|Q9I4L6', 'sipW|P54506', 'ChiA|P32823', 'HfsC|Q9A5L8', 'HfsA|Q9A5L6', 'sdrC|A0A6A8FED6', 'SRFAD|Q08788']	6	srf_foo_chia_sdrc_bap1_rbmc	drag-reducing_adhesion_chitinase-production	3	228958	Maribacter aquivivus
GCA_001750185.1	21	['SRFAB|Q04747', 'Foo1|A1X158', 'ompA|A0A3B6XXR4', 'HfaB|P27343', 'SRFAA|P27206', 'OmpU|P0C6Q6', 'ompW|A0A0F4PBB9', 'HfsD|Q9A5L5', 'HfsF|Q9A5M1', 'HfsG|Q9A5M0', 'HfsH|Q9A5L9', 'SRFAC|Q08787', 'yfiB|Q9I4L6', 'sipW|P54506', 'ChiA|P32823', 'HfsC|Q9A5L8', 'yfiR|Q9I4L4', 'HfsA|Q9A5L6', 'sdrC|A0A6A8FED6', 'GbpA|C3LW75', 'SRFAD|Q08788']	7	srf_hfacces_foo_chia_ompu_sdrc_gbpa	drag-reducing_adhesion_chitinase-production	3	1129367	Pseudoalteromonas luteoviolacea
GCA_009676865.1	19	['SRFAB|Q04747', 'ompA|A0A3B6XXR4', 'HfaB|P27343', 'SRFAA|P27206', 'OmpU|P0C6Q6', 'ompW|A0A0F4PBB9', 'HfsD|Q9A5L5', 'HfsF|Q9A5M1', 'HfsE|Q9A5M2', 'HfsG|Q9A5M0', 'HfsH|Q9A5L9', 'SRFAC|Q08787', 'yfiB|Q9I4L6', 'sipW|P54506', 'ChiA|P32823', 'HfsC|Q9A5L8', 'HfsA|Q9A5L6', 'GbpA|C3LW75', 'SRFAD|Q08788']	6	srf_hfs_hfacces_chia_ompu_gbpa	drag-reducing_adhesion_chitinase-production	3	2661922	Vibrio sp. THAF191d
GCA_002730815.1	19	['SRFAB|Q04747', 'Foo1|A1X158', 'ompA|A0A3B6XXR4', 'SRFAA|P27206', 'OmpU|P0C6Q6', 'tpbB|A0A0H2Z7X0', 'ompW|A0A0F4PBB9', 'RbmC|A0A2S1ZSI6', 'Bap1|Q9KQW0', 'HfsD|Q9A5L5', 'HfsF|Q9A5M1', 'HfsG|Q9A5M0', 'HfsH|Q9A5L9', 'SRFAC|Q08787', 'yfiB|Q9I4L6', 'sipW|P54506', 'ChiA|P32823', 'HfsC|Q9A5L8', 'SRFAD|Q08788']	6	srf_foo_chia_ompu_bap1_rbmc	drag-reducing_adhesion_chitinase-production	3	2024860	Spongiibacter sp.
GCA_002687035.1	17	['SRFAA|P27206', 'SRFAB|Q04747', 'HfsD|Q9A5L5', 'Foo1|A1X158', 'HfsF|Q9A5M1', 'HfsE|Q9A5M2', 'HfsG|Q9A5M0', 'HfsH|Q9A5L9', 'OmpU|P0C6Q6', 'SRFAC|Q08787', 'yfiB|Q9I4L6', 'ompW|A0A0F4PBB9', 'sipW|P54506', 'ChiA|P32823', 'HfsC|Q9A5L8', 'HfsA|Q9A5L6', 'SRFAD|Q08788']	5	srf_hfs_foo_chia_ompu	drag-reducing_adhesion_chitinase-production	3	1927144	Croceicoccus sp.
GCA_003991405.1	16	['SRFAA|P27206', 'SRFAB|Q04747', 'HfsD|Q9A5L5', 'Foo1|A1X158', 'HfsF|Q9A5M1', 'bslB|P39632', 'HfsG|Q9A5M0', 'HfsH|Q9A5L9', 'OmpU|P0C6Q6', 'SRFAD|Q08788', 'SRFAC|Q08787', 'yfiB|Q9I4L6', 'sipW|P54506', 'ChiA|P32823', 'HfsA|Q9A5L6', 'bslA|P71014']	5	bsl_srf_foo_chia_ompu	drag-reducing_adhesion_chitinase-production	3	2487931	Pseudorhodobacter sp. E13
GCA_009708195.1	19	['SRFAB|Q04747', 'ompA|A0A3B6XXR4', 'HfaB|P27343', 'SRFAA|P27206', 'OmpU|P0C6Q6', 'ompW|A0A0F4PBB9', 'HfsD|Q9A5L5', 'HfsF|Q9A5M1', 'HfsE|Q9A5M2', 'HfsG|Q9A5M0', 'HfsH|Q9A5L9', 'SRFAC|Q08787', 'yfiB|Q9I4L6', 'sipW|P54506', 'ChiA|P32823', 'HfsC|Q9A5L8', 'HfsA|Q9A5L6', 'GbpA|C3LW75', 'SRFAD|Q08788']	6	srf_hfs_hfacces_chia_ompu_gbpa	drag-reducing_adhesion_chitinase-production	3	2661921	Vibrio sp. THAF191c
GCA_000814765.1	21	['SRFAB|Q04747', 'Foo1|A1X158', 'ompA|A0A3B6XXR4', 'HfaB|P27343', 'SRFAA|P27206', 'OmpU|P0C6Q6', 'ompW|A0A0F4PBB9', 'HfsD|Q9A5L5', 'HfsF|Q9A5M1', 'HfsG|Q9A5M0', 'HfsH|Q9A5L9', 'SRFAC|Q08787', 'yfiB|Q9I4L6', 'sipW|P54506', 'ChiA|P32823', 'HfsC|Q9A5L8', 'yfiR|Q9I4L4', 'HfsA|Q9A5L6', 'sdrC|A0A6A8FED6', 'GbpA|C3LW75', 'SRFAD|Q08788']	7	srf_hfacces_foo_chia_ompu_sdrc_gbpa	drag-reducing_adhesion_chitinase-production	3	43657	Pseudoalteromonas luteoviolacea
GCA_001304455.1	18	['SRFAA|P27206', 'SRFAB|Q04747', 'HfsD|Q9A5L5', 'Foo1|A1X158', 'HfsF|Q9A5M1', 'HfsE|Q9A5M2', 'HfsG|Q9A5M0', 'HfsH|Q9A5L9', 'OmpU|P0C6Q6', 'tpbB|A0A0H2Z7X0', 'SRFAC|Q08787', 'sdrC|A0A6A8FED6', 'yfiB|Q9I4L6', 'sipW|P54506', 'ChiA|P32823', 'HfsC|Q9A5L8', 'HfsA|Q9A5L6', 'SRFAD|Q08788']	6	srf_hfs_foo_chia_ompu_sdrc	drag-reducing_adhesion_chitinase-production	3	1703416	Thiotrichales bacterium SG8_50
GCA_009910675.1	19	['SRFAB|Q04747', 'ompA|A0A3B6XXR4', 'HfaB|P27343', 'SRFAA|P27206', 'OmpU|P0C6Q6', 'ompW|A0A0F4PBB9', 'HfsD|Q9A5L5', 'HfsG|Q9A5M0', 'HfsH|Q9A5L9', 'SRFAC|Q08787', 'yfiB|Q9I4L6', 'sipW|P54506', 'ChiA|P32823', 'HfsC|Q9A5L8', 'yfiR|Q9I4L4', 'HfsA|Q9A5L6', 'sdrC|A0A6A8FED6', 'GbpA|C3LW75', 'SRFAD|Q08788']	6	srf_hfacces_chia_ompu_sdrc_gbpa	drag-reducing_adhesion_chitinase-production	3	1775171	Photobacterium alginatilyticum
GCA_002730895.1	22	['SRFAB|Q04747', 'Foo1|A1X158', 'HfaB|P27343', 'SRFAA|P27206', 'OmpU|P0C6Q6', 'tpbB|A0A0H2Z7X0', 'ompW|A0A0F4PBB9', 'RbmC|A0A2S1ZSI6', 'Bap1|Q9KQW0', 'HfsD|Q9A5L5', 'HfsF|Q9A5M1', 'HfsE|Q9A5M2', 'HfsG|Q9A5M0', 'HfsH|Q9A5L9', 'SRFAC|Q08787', 'yfiB|Q9I4L6', 'sipW|P54506', 'ChiA|P32823', 'HfsC|Q9A5L8', 'yfiR|Q9I4L4', 'HfsA|Q9A5L6', 'SRFAD|Q08788']	9	srf_hfs_hfacces_foo_chia_yfi_ompu_bap1_rbmc	drag-reducing_adhesion_chitinase-production	3	1873897	Cupriavidus sp.
GCA_002694745.1	18	['SRFAA|P27206', 'SRFAB|Q04747', 'HfsD|Q9A5L5', 'Foo1|A1X158', 'HfsF|Q9A5M1', 'HfsE|Q9A5M2', 'HfsG|Q9A5M0', 'HfsH|Q9A5L9', 'OmpU|P0C6Q6', 'ompA|A0A3B6XXR4', 'SRFAC|Q08787', 'yfiB|Q9I4L6', 'ompW|A0A0F4PBB9', 'sipW|P54506', 'ChiA|P32823', 'HfsC|Q9A5L8', 'HfsA|Q9A5L6', 'SRFAD|Q08788']	5	srf_hfs_foo_chia_ompu	drag-reducing_adhesion_chitinase-production	3	1927144	Croceicoccus sp.
GCA_000473545.1	23	['SRFAB|Q04747', 'Foo1|A1X158', 'ompA|A0A3B6XXR4', 'HfaB|P27343', 'SRFAA|P27206', 'OmpU|P0C6Q6', 'tpbB|A0A0H2Z7X0', 'ompW|A0A0F4PBB9', 'RbmC|A0A2S1ZSI6', 'Bap1|Q9KQW0', 'HfsD|Q9A5L5', 'HfsF|Q9A5M1', 'HfsE|Q9A5M2', 'HfsG|Q9A5M0', 'HfsH|Q9A5L9', 'SRFAC|Q08787', 'yfiB|Q9I4L6', 'sipW|P54506', 'ChiA|P32823', 'HfsC|Q9A5L8', 'HfsA|Q9A5L6', 'GbpA|C3LW75', 'SRFAD|Q08788']	9	srf_hfs_hfacces_foo_chia_ompu_bap1_rbmc_gbpa	drag-reducing_adhesion_chitinase-production	3	1136163	Vibrio cyclitrophicus
GCA_003856525.1	19	['SRFAB|Q04747', 'ompA|A0A3B6XXR4', 'HfaB|P27343', 'SRFAA|P27206', 'OmpU|P0C6Q6', 'RbmC|A0A2S1ZSI6', 'Bap1|Q9KQW0', 'HfsD|Q9A5L5', 'HfsF|Q9A5M1', 'HfsE|Q9A5M2', 'HfsG|Q9A5M0', 'HfsH|Q9A5L9', 'SRFAC|Q08787', 'yfiB|Q9I4L6', 'sipW|P54506', 'ChiA|P32823', 'HfsC|Q9A5L8', 'HfsA|Q9A5L6', 'SRFAD|Q08788']	7	srf_hfs_hfacces_chia_ompu_bap1_rbmc	drag-reducing_adhesion_chitinase-production	3	2487322	Vibrio viridaestus
GCA_001625565.1	20	['SRFAB|Q04747', 'Foo1|A1X158', 'ompA|A0A3B6XXR4', 'HfaB|P27343', 'SRFAA|P27206', 'OmpU|P0C6Q6', 'ompW|A0A0F4PBB9', 'HfsD|Q9A5L5', 'HfsG|Q9A5M0', 'HfsH|Q9A5L9', 'SRFAC|Q08787', 'yfiB|Q9I4L6', 'sipW|P54506', 'ChiA|P32823', 'HfsC|Q9A5L8', 'yfiR|Q9I4L4', 'HfsA|Q9A5L6', 'sdrC|A0A6A8FED6', 'GbpA|C3LW75', 'SRFAD|Q08788']	7	srf_hfacces_foo_chia_ompu_sdrc_gbpa	drag-reducing_adhesion_chitinase-production	3	1365254	Pseudoalteromonas luteoviolacea
GCA_002720865.1	17	['SRFAA|P27206', 'SRFAB|Q04747', 'HfsD|Q9A5L5', 'OmpU|P0C6Q6', 'HfsF|Q9A5M1', 'HfsE|Q9A5M2', 'HfsG|Q9A5M0', 'HfsH|Q9A5L9', 'SRFAC|Q08787', 'yfiB|Q9I4L6', 'ompW|A0A0F4PBB9', 'sipW|P54506', 'ChiA|P32823', 'HfsC|Q9A5L8', 'HfaB|P27343', 'HfsA|Q9A5L6', 'SRFAD|Q08788']	5	srf_hfs_hfacces_chia_ompu	drag-reducing_adhesion_chitinase-production	3	2020862	Halobacteriovorax sp.
GCA_001974605.1	30	['SRFAB|Q04747', 'CHPC|Q9AD93', 'ompA|A0A3B6XXR4', 'CHPE|Q9X9Z2', 'HfaB|P27343', 'SRFAA|P27206', 'OmpU|P0C6Q6', 'tpbB|A0A0H2Z7X0', 'ompW|A0A0F4PBB9', 'CHPG|Q9KYH3', 'RbmC|A0A2S1ZSI6', 'Bap1|Q9KQW0', 'CHPA|Q8CJY7', 'HfsD|Q9A5L5', 'HfsG|Q9A5M0', 'HfsE|Q9A5M2', 'HfsH|Q9A5L9', 'SRFAC|Q08787', 'yfiB|Q9I4L6', 'CHPF|Q9KYG7', 'CHPH|Q9AD92', 'sipW|P54506', 'ChiA|P32823', 'HfsC|Q9A5L8', 'yfiR|Q9I4L4', 'Hfs…	9	srf_hfacces_chp_chia_yfi_ompu_bap1_rbmc_gbpa	drag-reducing_adhesion_chitinase-production	3	136468	Vibrio lentus
GCA_009725985.1	16	['SRFAA|P27206', 'SRFAB|Q04747', 'HfsD|Q9A5L5', 'Foo1|A1X158', 'HfsF|Q9A5M1', 'HfsE|Q9A5M2', 'HfsG|Q9A5M0', 'HfsH|Q9A5L9', 'sdrC|A0A6A8FED6', 'SRFAC|Q08787', 'yfiB|Q9I4L6', 'sipW|P54506', 'ChiA|P32823', 'HfsC|Q9A5L8', 'HfsA|Q9A5L6', 'SRFAD|Q08788']	5	srf_hfs_foo_chia_sdrc	drag-reducing_adhesion_chitinase-production	3	248905	Zobellia amurskyensis
GCA_002683295.1	17	['SRFAA|P27206', 'SRFAB|Q04747', 'HfsD|Q9A5L5', 'OmpU|P0C6Q6', 'HfsF|Q9A5M1', 'HfsE|Q9A5M2', 'HfsG|Q9A5M0', 'HfsH|Q9A5L9', 'ompA|A0A3B6XXR4', 'SRFAC|Q08787', 'yfiB|Q9I4L6', 'ompW|A0A0F4PBB9', 'sipW|P54506', 'ChiA|P32823', 'HfsC|Q9A5L8', 'yfiR|Q9I4L4', 'SRFAD|Q08788']	3	srf_chia_ompu	drag-reducing_chitinase-production_adhesion	3	1891229	Pseudomonadales bacterium
GCA_002873265.1	26	['CHPC|Q9AD93', 'ompA|A0A3B6XXR4', 'CHPE|Q9X9Z2', 'HfaB|P27343', 'OmpU|P0C6Q6', 'tpbB|A0A0H2Z7X0', 'ompW|A0A0F4PBB9', 'CHPG|Q9KYH3', 'CHPA|Q8CJY7', 'HfsD|Q9A5L5', 'HfsF|Q9A5M1', 'HfsE|Q9A5M2', 'HfsG|Q9A5M0', 'HfsH|Q9A5L9', 'yfiB|Q9I4L6', 'CHPF|Q9KYG7', 'CHPH|Q9AD92', 'sipW|P54506', 'ChiA|P32823', 'HfsC|Q9A5L8', 'yfiR|Q9I4L4', 'HfsA|Q9A5L6', 'CHPB|Q9X7U2', 'CHPD|Q9L1J9', 'GbpA|C3LW75', 'SRFAD|Q087…	7	hfs_hfacces_chp_chia_yfi_ompu_gbpa	adhesion_drag-reducing_chitinase-production	3	136468	Vibrio lentus
GCA_000376545.2	14	['SRFAA|P27206', 'SRFAB|Q04747', 'HfsD|Q9A5L5', 'OmpU|P0C6Q6', 'HfsG|Q9A5M0', 'HfsH|Q9A5L9', 'tpbB|A0A0H2Z7X0', 'SRFAC|Q08787', 'yfiB|Q9I4L6', 'ompW|A0A0F4PBB9', 'sipW|P54506', 'ChiA|P32823', 'HfsA|Q9A5L6', 'SRFAD|Q08788']	3	srf_chia_ompu	drag-reducing_chitinase-production_adhesion	3	1265309	Tritonibacter mobilis
GCA_900102755.1	22	['SRFAB|Q04747', 'CHPC|Q9AD93', 'ompA|A0A3B6XXR4', 'CHPE|Q9X9Z2', 'SRFAA|P27206', 'CHPG|Q9KYH3', 'CHPA|Q8CJY7', 'HfsD|Q9A5L5', 'HfsF|Q9A5M1', 'HfsE|Q9A5M2', 'HfsG|Q9A5M0', 'HfsH|Q9A5L9', 'yfiB|Q9I4L6', 'CHPF|Q9KYG7', 'CHPH|Q9AD92', 'sipW|P54506', 'ChiA|P32823', 'HfsC|Q9A5L8', 'HfsA|Q9A5L6', 'CHPB|Q9X7U2', 'CHPD|Q9L1J9', 'SRFAD|Q08788']	3	hfs_chp_chia	adhesion_drag-reducing_chitinase-production	3	530584	Prauserella marina
GCA_000332115.1	19	['SRFAB|Q04747', 'ompA|A0A3B6XXR4', 'SRFAA|P27206', 'OmpU|P0C6Q6', 'tpbB|A0A0H2Z7X0', 'ompW|A0A0F4PBB9', 'HfsD|Q9A5L5', 'HfsF|Q9A5M1', 'HfsE|Q9A5M2', 'HfsG|Q9A5M0', 'HfsH|Q9A5L9', 'SRFAC|Q08787', 'yfiB|Q9I4L6', 'sipW|P54506', 'ChiA|P32823', 'HfsC|Q9A5L8', 'HfsA|Q9A5L6', 'sdrC|A0A6A8FED6', 'SRFAD|Q08788']	5	srf_hfs_chia_ompu_sdrc	drag-reducing_adhesion_chitinase-production	3	592029	Nonlabens dokdonensis
GCA_014230145.1	19	['SRFAB|Q04747', 'HfaB|P27343', 'SRFAA|P27206', 'tpbB|A0A0H2Z7X0', 'ompW|A0A0F4PBB9', 'HfsD|Q9A5L5', 'HfsF|Q9A5M1', 'HfsE|Q9A5M2', 'HfsG|Q9A5M0', 'HfsH|Q9A5L9', 'SRFAC|Q08787', 'yfiB|Q9I4L6', 'sipW|P54506', 'ChiA|P32823', 'HfsC|Q9A5L8', 'yfiR|Q9I4L4', 'HfsA|Q9A5L6', 'sdrC|A0A6A8FED6', 'SRFAD|Q08788']	6	srf_hfs_hfacces_chia_yfi_sdrc	drag-reducing_adhesion_chitinase-production	3	415222	Pelagicoccus albus
GCA_001635515.1	18	['SRFAA|P27206', 'SRFAB|Q04747', 'HfsD|Q9A5L5', 'OmpU|P0C6Q6', 'HfsF|Q9A5M1', 'HfsE|Q9A5M2', 'HfsG|Q9A5M0', 'sdrC|A0A6A8FED6', 'ompA|A0A3B6XXR4', 'SRFAC|Q08787', 'yfiB|Q9I4L6', 'ompW|A0A0F4PBB9', 'sipW|P54506', 'ChiA|P32823', 'HfsC|Q9A5L8', 'HfaB|P27343', 'HfsA|Q9A5L6', 'SRFAD|Q08788']	5	srf_hfacces_chia_ompu_sdrc	drag-reducing_adhesion_chitinase-production	3	1822217	Alcanivorax sp. HI0003
GCA_002703625.1	20	['SRFAB|Q04747', 'Foo1|A1X158', 'SRFAA|P27206', 'OmpU|P0C6Q6', 'RbmC|A0A2S1ZSI6', 'Bap1|Q9KQW0', 'HfsD|Q9A5L5', 'HfsF|Q9A5M1', 'HfsE|Q9A5M2', 'HfsG|Q9A5M0', 'HfsH|Q9A5L9', 'SRFAC|Q08787', 'yfiB|Q9I4L6', 'sipW|P54506', 'ChiA|P32823', 'HfsC|Q9A5L8', 'HfsA|Q9A5L6', 'sdrC|A0A6A8FED6', 'GbpA|C3LW75', 'SRFAD|Q08788']	9	srf_hfs_foo_chia_ompu_sdrc_bap1_rbmc_gbpa	drag-reducing_adhesion_chitinase-production	3	2024858	Sandaracinus sp.
GCA_002873555.1	28	['SRFAB|Q04747', 'CHPC|Q9AD93', 'Foo1|A1X158', 'ompA|A0A3B6XXR4', 'CHPE|Q9X9Z2', 'HfaB|P27343', 'SRFAA|P27206', 'OmpU|P0C6Q6', 'tpbB|A0A0H2Z7X0', 'ompW|A0A0F4PBB9', 'CHPG|Q9KYH3', 'CHPA|Q8CJY7', 'HfsD|Q9A5L5', 'HfsF|Q9A5M1', 'HfsG|Q9A5M0', 'HfsH|Q9A5L9', 'yfiB|Q9I4L6', 'CHPF|Q9KYG7', 'CHPH|Q9AD92', 'sipW|P54506', 'ChiA|P32823', 'HfsC|Q9A5L8', 'yfiR|Q9I4L4', 'HfsA|Q9A5L6', 'CHPB|Q9X7U2', 'CHPD|Q9L…	7	hfacces_chp_foo_chia_yfi_ompu_gbpa	adhesion_drag-reducing_chitinase-production	3	136468	Vibrio lentus
GCA_002876225.1	30	['SRFAB|Q04747', 'CHPC|Q9AD93', 'ompA|A0A3B6XXR4', 'CHPE|Q9X9Z2', 'HfaB|P27343', 'SRFAA|P27206', 'OmpU|P0C6Q6', 'tpbB|A0A0H2Z7X0', 'ompW|A0A0F4PBB9', 'CHPG|Q9KYH3', 'RbmC|A0A2S1ZSI6', 'Bap1|Q9KQW0', 'CHPA|Q8CJY7', 'HfsD|Q9A5L5', 'HfsG|Q9A5M0', 'HfsE|Q9A5M2', 'HfsH|Q9A5L9', 'SRFAC|Q08787', 'yfiB|Q9I4L6', 'CHPF|Q9KYG7', 'CHPH|Q9AD92', 'sipW|P54506', 'ChiA|P32823', 'HfsC|Q9A5L8', 'yfiR|Q9I4L4', 'Hfs…	9	srf_hfacces_chp_chia_yfi_ompu_bap1_rbmc_gbpa	drag-reducing_adhesion_chitinase-production	3	136468	Vibrio lentus
GCA_001635455.1	19	['SRFAB|Q04747', 'Foo1|A1X158', 'ompA|A0A3B6XXR4', 'HfaB|P27343', 'SRFAA|P27206', 'OmpU|P0C6Q6', 'tpbB|A0A0H2Z7X0', 'ompW|A0A0F4PBB9', 'HfsD|Q9A5L5', 'HfsG|Q9A5M0', 'HfsH|Q9A5L9', 'SRFAC|Q08787', 'yfiB|Q9I4L6', 'sipW|P54506', 'ChiA|P32823', 'HfsC|Q9A5L8', 'HfsA|Q9A5L6', 'GbpA|C3LW75', 'SRFAD|Q08788']	6	srf_hfacces_foo_chia_ompu_gbpa	drag-reducing_adhesion_chitinase-production	3	1822216	Vibrio sp. HI00D65
GCA_020147865.1	19	['SRFAB|Q04747', 'bslA|P71014', 'Foo1|A1X158', 'ompA|A0A3B6XXR4', 'SRFAA|P27206', 'bslB|P39632', 'HfsD|Q9A5L5', 'HfsF|Q9A5M1', 'HfsG|Q9A5M0', 'HfsH|Q9A5L9', 'tasA|P54507', 'SRFAC|Q08787', 'yfiB|Q9I4L6', 'sipW|P54506', 'ChiA|P32823', 'HfsC|Q9A5L8', 'HfsA|Q9A5L6', 'sdrC|A0A6A8FED6', 'SRFAD|Q08788']	6	bsl_srf_foo_chia_tapA_sdrc	drag-reducing_adhesion_chitinase-production	3	561879	Bacillus safensis
GCA_001625645.1	21	['SRFAB|Q04747', 'Foo1|A1X158', 'ompA|A0A3B6XXR4', 'HfaB|P27343', 'SRFAA|P27206', 'OmpU|P0C6Q6', 'ompW|A0A0F4PBB9', 'RbmC|A0A2S1ZSI6', 'Bap1|Q9KQW0', 'HfsD|Q9A5L5', 'HfsF|Q9A5M1', 'HfsG|Q9A5M0', 'HfsH|Q9A5L9', 'SRFAC|Q08787', 'yfiB|Q9I4L6', 'sipW|P54506', 'ChiA|P32823', 'yfiR|Q9I4L4', 'HfsA|Q9A5L6', 'GbpA|C3LW75', 'SRFAD|Q08788']	8	srf_hfacces_foo_chia_ompu_bap1_rbmc_gbpa	drag-reducing_adhesion_chitinase-production	3	1365249	Pseudoalteromonas luteoviolacea
GCA_002726155.1	19	['SRFAB|Q04747', 'Foo1|A1X158', 'ompA|A0A3B6XXR4', 'HfaB|P27343', 'SRFAA|P27206', 'OmpU|P0C6Q6', 'ompW|A0A0F4PBB9', 'HfsD|Q9A5L5', 'HfsF|Q9A5M1', 'HfsG|Q9A5M0', 'HfsH|Q9A5L9', 'SRFAC|Q08787', 'yfiB|Q9I4L6', 'sipW|P54506', 'ChiA|P32823', 'HfsC|Q9A5L8', 'HfsA|Q9A5L6', 'sdrC|A0A6A8FED6', 'SRFAD|Q08788']	6	srf_hfacces_foo_chia_ompu_sdrc	drag-reducing_adhesion_chitinase-production	3	1872427	Alcanivorax sp.
GCA_000024805.1	20	['SRFAB|Q04747', 'Foo1|A1X158', 'ompA|A0A3B6XXR4', 'SRFAA|P27206', 'OmpU|P0C6Q6', 'RbmC|A0A2S1ZSI6', 'Bap1|Q9KQW0', 'HfsD|Q9A5L5', 'HfsF|Q9A5M1', 'HfsG|Q9A5M0', 'HfsH|Q9A5L9', 'SRFAC|Q08787', 'yfiB|Q9I4L6', 'sipW|P54506', 'ChiA|P32823', 'HfsC|Q9A5L8', 'HfsA|Q9A5L6', 'sdrC|A0A6A8FED6', 'GbpA|C3LW75', 'SRFAD|Q08788']	8	srf_foo_chia_ompu_sdrc_bap1_rbmc_gbpa	drag-reducing_adhesion_chitinase-production	3	502025	Haliangium ochraceum
GCA_002874075.1	25	['CHPC|Q9AD93', 'ompA|A0A3B6XXR4', 'CHPE|Q9X9Z2', 'HfaB|P27343', 'OmpU|P0C6Q6', 'tpbB|A0A0H2Z7X0', 'ompW|A0A0F4PBB9', 'CHPG|Q9KYH3', 'CHPA|Q8CJY7', 'HfsD|Q9A5L5', 'HfsF|Q9A5M1', 'HfsG|Q9A5M0', 'HfsH|Q9A5L9', 'yfiB|Q9I4L6', 'CHPF|Q9KYG7', 'CHPH|Q9AD92', 'sipW|P54506', 'ChiA|P32823', 'HfsC|Q9A5L8', 'yfiR|Q9I4L4', 'HfsA|Q9A5L6', 'CHPB|Q9X7U2', 'CHPD|Q9L1J9', 'GbpA|C3LW75', 'SRFAD|Q08788']	6	hfacces_chp_chia_yfi_ompu_gbpa	adhesion_drag-reducing_chitinase-production	3	136468	Vibrio lentus
GCA_000744275.1	18	['SRFAC|Q08787', 'ChiA|P32823', 'HfsG|Q9A5M0', 'HfsE|Q9A5M2', 'HfsF|Q9A5M1', 'HfaB|P27343', 'SRFAD|Q08788', 'HfsH|Q9A5L9', 'OmpU|P0C6Q6', 'yfiB|Q9I4L6', 'SRFAA|P27206', 'HfsC|Q9A5L8', 'tpbB|A0A0H2Z7X0', 'sipW|P54506', 'sdrC|A0A6A8FED6', 'HfsA|Q9A5L6', 'SRFAB|Q04747', 'HfsD|Q9A5L5']	6	srf_hfs_hfacces_chia_ompu_sdrc	drag-reducing_adhesion_chitinase-production	3	1249975	Gillisia sp. Hel_I_29
GCA_013403865.1	17	['SRFAC|Q08787', 'ChiA|P32823', 'HfsG|Q9A5M0', 'Foo1|A1X158', 'HfsE|Q9A5M2', 'HfsF|Q9A5M1', 'SRFAD|Q08788', 'HfsH|Q9A5L9', 'yfiB|Q9I4L6', 'sipW|P54506', 'SRFAA|P27206', 'HfsC|Q9A5L8', 'tpbB|A0A0H2Z7X0', 'sdrC|A0A6A8FED6', 'HfsA|Q9A5L6', 'SRFAB|Q04747', 'HfsD|Q9A5L5']	5	srf_hfs_foo_chia_sdrc	drag-reducing_adhesion_chitinase-production	3	2697008	Winogradskyella costae
GCA_003574485.1	21	['SRFAC|Q08787', 'HfaB|P27343', 'HfsH|Q9A5L9', 'sdrC|A0A6A8FED6', 'HfsG|Q9A5M0', 'HfsE|Q9A5M2', 'SRFAD|Q08788', 'HfsC|Q9A5L8', 'SRFAB|Q04747', 'RbmC|A0A2S1ZSI6', 'GbpA|C3LW75', 'yfiB|Q9I4L6', 'SRFAA|P27206', 'Bap1|Q9KQW0', 'HfsA|Q9A5L6', 'ompA|A0A3B6XXR4', 'HfsD|Q9A5L5', 'sipW|P54506', 'ChiA|P32823', 'HfsF|Q9A5M1', 'tpbB|A0A0H2Z7X0']	8	srf_hfs_hfacces_chia_sdrc_bap1_rbmc_gbpa	drag-reducing_adhesion_chitinase-production	3	2219058	Facilibium subflavum
GCA_001681925.1	14	['SRFAC|Q08787', 'ChiA|P32823', 'HfsG|Q9A5M0', 'SRFAD|Q08788', 'HfsH|Q9A5L9', 'OmpU|P0C6Q6', 'yfiB|Q9I4L6', 'SRFAA|P27206', 'ompW|A0A0F4PBB9', 'tpbB|A0A0H2Z7X0', 'sipW|P54506', 'HfsA|Q9A5L6', 'SRFAB|Q04747', 'HfsD|Q9A5L5']	3	srf_chia_ompu	drag-reducing_chitinase-production_adhesion	3	379347	Tritonibacter mobilis
GCA_013394675.1	15	['SRFAC|Q08787', 'ChiA|P32823', 'HfsG|Q9A5M0', 'HfsE|Q9A5M2', 'SRFAD|Q08788', 'HfsH|Q9A5L9', 'yfiB|Q9I4L6', 'sipW|P54506', 'SRFAA|P27206', 'HfsC|Q9A5L8', 'tpbB|A0A0H2Z7X0', 'sdrC|A0A6A8FED6', 'HfsA|Q9A5L6', 'SRFAB|Q04747', 'HfsD|Q9A5L5']	3	srf_chia_sdrc	drag-reducing_chitinase-production_adhesion	3	2697010	Winogradskyella helgolandensis
GCA_013404085.1	16	['SRFAC|Q08787', 'ChiA|P32823', 'HfsG|Q9A5M0', 'HfsE|Q9A5M2', 'HfsF|Q9A5M1', 'SRFAD|Q08788', 'HfsH|Q9A5L9', 'yfiB|Q9I4L6', 'sipW|P54506', 'SRFAA|P27206', 'HfsC|Q9A5L8', 'tpbB|A0A0H2Z7X0', 'sdrC|A0A6A8FED6', 'HfsA|Q9A5L6', 'SRFAB|Q04747', 'HfsD|Q9A5L5']	4	srf_hfs_chia_sdrc	drag-reducing_adhesion_chitinase-production	3	2697010	Winogradskyella helgolandensis
GCA_000281085.1	19	['SRFAC|Q08787', 'yfiR|Q9I4L4', 'HfaB|P27343', 'HfsH|Q9A5L9', 'HfsG|Q9A5M0', 'HfsE|Q9A5M2', 'SRFAD|Q08788', 'OmpU|P0C6Q6', 'HfsC|Q9A5L8', 'SRFAB|Q04747', 'Foo1|A1X158', 'yfiB|Q9I4L6', 'SRFAA|P27206', 'HfsA|Q9A5L6', 'ompA|A0A3B6XXR4', 'sipW|P54506', 'HfsD|Q9A5L5', 'ChiA|P32823', 'tpbB|A0A0H2Z7X0']	6	srf_hfacces_foo_chia_yfi_ompu	drag-reducing_adhesion_chitinase-production	3	659495	Catenovulum agarivorans
GCA_014154945.1	18	['pilF|A0A290TXQ9', 'SRFAC|Q08787', 'ChiA|P32823', 'HfsG|Q9A5M0', 'Foo1|A1X158', 'HfsE|Q9A5M2', 'HfsF|Q9A5M1', 'SRFAD|Q08788', 'HfsH|Q9A5L9', 'yfiB|Q9I4L6', 'sipW|P54506', 'SRFAA|P27206', 'HfsC|Q9A5L8', 'Bap1|Q9KQW0', 'HfsA|Q9A5L6', 'SRFAB|Q04747', 'HfsD|Q9A5L5', 'RbmC|A0A2S1ZSI6']	6	srf_hfs_foo_chia_bap1_rbmc	drag-reducing_adhesion_chitinase-production	3	2728037	Tautonia rosea
GCA_001681475.1	14	['SRFAC|Q08787', 'ChiA|P32823', 'HfsG|Q9A5M0', 'SRFAD|Q08788', 'HfsH|Q9A5L9', 'OmpU|P0C6Q6', 'yfiB|Q9I4L6', 'SRFAA|P27206', 'ompW|A0A0F4PBB9', 'tpbB|A0A0H2Z7X0', 'sipW|P54506', 'HfsA|Q9A5L6', 'SRFAB|Q04747', 'HfsD|Q9A5L5']	3	srf_chia_ompu	drag-reducing_chitinase-production_adhesion	3	379347	Tritonibacter mobilis
GCA_000382005.1	23	['SRFAC|Q08787', 'yfiR|Q9I4L4', 'HfaB|P27343', 'HfsH|Q9A5L9', 'sdrC|A0A6A8FED6', 'HfsG|Q9A5M0', 'SRFAD|Q08788', 'OmpU|P0C6Q6', 'SRFAB|Q04747', 'GbpA|C3LW75', 'pilF|A0A290TXQ9', 'Foo1|A1X158', 'yfiB|Q9I4L6', 'SRFAA|P27206', 'Bap1|Q9KQW0', 'HfsA|Q9A5L6', 'ompA|A0A3B6XXR4', 'HfsD|Q9A5L5', 'sipW|P54506', 'ChiA|P32823', 'HfsF|Q9A5M1', 'ompW|A0A0F4PBB9', 'tpbB|A0A0H2Z7X0']	10	srf_hfacces_foo_chia_omp_yfi_ompu_sdrc_bap1_gbpa	drag-reducing_adhesion_chitinase-production	3	1279016	Pseudoalteromonas piscicida
GCA_001682005.1	14	['SRFAC|Q08787', 'ChiA|P32823', 'HfsG|Q9A5M0', 'SRFAD|Q08788', 'HfsH|Q9A5L9', 'OmpU|P0C6Q6', 'yfiB|Q9I4L6', 'SRFAA|P27206', 'ompW|A0A0F4PBB9', 'tpbB|A0A0H2Z7X0', 'sipW|P54506', 'HfsA|Q9A5L6', 'SRFAB|Q04747', 'HfsD|Q9A5L5']	3	srf_chia_ompu	drag-reducing_chitinase-production_adhesion	3	379347	Tritonibacter mobilis
GCA_008711465.1	17	['GbpA|C3LW75', 'SRFAC|Q08787', 'ChiA|P32823', 'HfsG|Q9A5M0', 'HfsE|Q9A5M2', 'HfsF|Q9A5M1', 'HfaB|P27343', 'SRFAD|Q08788', 'yfiB|Q9I4L6', 'sipW|P54506', 'SRFAA|P27206', 'HfsC|Q9A5L8', 'Bap1|Q9KQW0', 'tpbB|A0A0H2Z7X0', 'SRFAB|Q04747', 'HfsD|Q9A5L5', 'RbmC|A0A2S1ZSI6']	6	srf_hfacces_chia_bap1_rbmc_gbpa	drag-reducing_adhesion_chitinase-production	3	2610888	Francisella sp. SYW-9
GCA_002148795.1	19	['SRFAC|Q08787', 'HfsH|Q9A5L9', 'HfsG|Q9A5M0', 'HfsE|Q9A5M2', 'SRFAD|Q08788', 'OmpU|P0C6Q6', 'HfsC|Q9A5L8', 'SRFAB|Q04747', 'RbmC|A0A2S1ZSI6', 'yfiB|Q9I4L6', 'SRFAA|P27206', 'Bap1|Q9KQW0', 'HfsA|Q9A5L6', 'ompA|A0A3B6XXR4', 'sipW|P54506', 'HfsD|Q9A5L5', 'ChiA|P32823', 'HfsF|Q9A5M1', 'tpbB|A0A0H2Z7X0']	6	srf_hfs_chia_ompu_bap1_rbmc	drag-reducing_adhesion_chitinase-production	3	1909734	Oceanibaculum nanhaiense
GCA_010993815.1	19	['SRFAC|Q08787', 'sdrC|A0A6A8FED6', 'HfsG|Q9A5M0', 'SRFAD|Q08788', 'HfsC|Q9A5L8', 'SRFAB|Q04747', 'RbmC|A0A2S1ZSI6', 'Foo1|A1X158', 'yfiB|Q9I4L6', 'SRFAA|P27206', 'Bap1|Q9KQW0', 'HfsA|Q9A5L6', 'ompA|A0A3B6XXR4', 'sipW|P54506', 'HfsD|Q9A5L5', 'ChiA|P32823', 'HfsF|Q9A5M1', 'ompW|A0A0F4PBB9', 'tpbB|A0A0H2Z7X0']	6	srf_foo_chia_sdrc_bap1_rbmc	drag-reducing_adhesion_chitinase-production	3	2654675	Flagellimonas sp. HSM57
GCA_002320815.1	20	['SRFAC|Q08787', 'HfsH|Q9A5L9', 'sdrC|A0A6A8FED6', 'HfsG|Q9A5M0', 'HfsE|Q9A5M2', 'SRFAD|Q08788', 'OmpU|P0C6Q6', 'HfsC|Q9A5L8', 'SRFAB|Q04747', 'RbmC|A0A2S1ZSI6', 'GbpA|C3LW75', 'Foo1|A1X158', 'yfiB|Q9I4L6', 'SRFAA|P27206', 'Bap1|Q9KQW0', 'HfsA|Q9A5L6', 'HfsD|Q9A5L5', 'sipW|P54506', 'ChiA|P32823', 'HfsF|Q9A5M1']	9	srf_hfs_foo_chia_ompu_sdrc_bap1_rbmc_gbpa	drag-reducing_adhesion_chitinase-production	3	1961462	Myxococcales bacterium UBA1660
GCA_000308335.1	20	['SRFAC|Q08787', 'HfsH|Q9A5L9', 'sdrC|A0A6A8FED6', 'HfsG|Q9A5M0', 'HfsE|Q9A5M2', 'SRFAD|Q08788', 'OmpU|P0C6Q6', 'HfsC|Q9A5L8', 'SRFAB|Q04747', 'GbpA|C3LW75', 'yfiB|Q9I4L6', 'SRFAA|P27206', 'HfsA|Q9A5L6', 'ompA|A0A3B6XXR4', 'HfsD|Q9A5L5', 'sipW|P54506', 'ChiA|P32823', 'HfsF|Q9A5M1', 'ompW|A0A0F4PBB9', 'tpbB|A0A0H2Z7X0']	6	srf_hfs_chia_ompu_sdrc_gbpa	drag-reducing_adhesion_chitinase-production	3	1118235	Stenotrophomonas maltophilia
GCA_001894885.1	15	['ompA|A0A3B6XXR4', 'SRFAC|Q08787', 'ChiA|P32823', 'HfsG|Q9A5M0', 'Foo1|A1X158', 'SRFAD|Q08788', 'HfsH|Q9A5L9', 'yfiB|Q9I4L6', 'sipW|P54506', 'SRFAA|P27206', 'Bap1|Q9KQW0', 'tasA|P54507', 'SRFAB|Q04747', 'HfsD|Q9A5L5', 'RbmC|A0A2S1ZSI6']	6	srf_foo_chia_tapA_bap1_rbmc	drag-reducing_adhesion_chitinase-production	3	1219020	Rhodococcus marinonascens
GCA_001681355.1	14	['SRFAC|Q08787', 'ChiA|P32823', 'HfsG|Q9A5M0', 'SRFAD|Q08788', 'HfsH|Q9A5L9', 'OmpU|P0C6Q6', 'yfiB|Q9I4L6', 'SRFAA|P27206', 'ompW|A0A0F4PBB9', 'tpbB|A0A0H2Z7X0', 'sipW|P54506', 'HfsA|Q9A5L6', 'SRFAB|Q04747', 'HfsD|Q9A5L5']	3	srf_chia_ompu	drag-reducing_chitinase-production_adhesion	3	379347	Tritonibacter mobilis
GCA_001681405.1	14	['SRFAC|Q08787', 'ChiA|P32823', 'HfsG|Q9A5M0', 'SRFAD|Q08788', 'HfsH|Q9A5L9', 'OmpU|P0C6Q6', 'yfiB|Q9I4L6', 'SRFAA|P27206', 'ompW|A0A0F4PBB9', 'tpbB|A0A0H2Z7X0', 'sipW|P54506', 'HfsA|Q9A5L6', 'SRFAB|Q04747', 'HfsD|Q9A5L5']	3	srf_chia_ompu	drag-reducing_chitinase-production_adhesion	3	379347	Tritonibacter mobilis
GCA_000745975.1	14	['SRFAC|Q08787', 'ChiA|P32823', 'HfsG|Q9A5M0', 'yfiR|Q9I4L4', 'HfsF|Q9A5M1', 'HfaB|P27343', 'SRFAD|Q08788', 'HfsH|Q9A5L9', 'yfiB|Q9I4L6', 'sipW|P54506', 'SRFAA|P27206', 'HfsA|Q9A5L6', 'SRFAB|Q04747', 'HfsD|Q9A5L5']	3	srf_hfacces_chia	drag-reducing_adhesion_chitinase-production	3	1121398	Desulfobacter vibrioformis
GCA_001683015.1	14	['SRFAC|Q08787', 'ChiA|P32823', 'HfsG|Q9A5M0', 'SRFAD|Q08788', 'HfsH|Q9A5L9', 'OmpU|P0C6Q6', 'yfiB|Q9I4L6', 'SRFAA|P27206', 'ompW|A0A0F4PBB9', 'tpbB|A0A0H2Z7X0', 'sipW|P54506', 'HfsA|Q9A5L6', 'SRFAB|Q04747', 'HfsD|Q9A5L5']	3	srf_chia_ompu	drag-reducing_chitinase-production_adhesion	3	379347	Tritonibacter mobilis
GCA_001681285.1	14	['SRFAC|Q08787', 'ChiA|P32823', 'HfsG|Q9A5M0', 'SRFAD|Q08788', 'HfsH|Q9A5L9', 'OmpU|P0C6Q6', 'yfiB|Q9I4L6', 'SRFAA|P27206', 'ompW|A0A0F4PBB9', 'tpbB|A0A0H2Z7X0', 'sipW|P54506', 'HfsA|Q9A5L6', 'SRFAB|Q04747', 'HfsD|Q9A5L5']	3	srf_chia_ompu	drag-reducing_chitinase-production_adhesion	3	379347	Tritonibacter mobilis
GCA_017948405.1	22	['SRFAC|Q08787', 'yfiR|Q9I4L4', 'HfaB|P27343', 'HfsH|Q9A5L9', 'sdrC|A0A6A8FED6', 'HfsG|Q9A5M0', 'HfsE|Q9A5M2', 'SRFAD|Q08788', 'OmpU|P0C6Q6', 'HfsC|Q9A5L8', 'SRFAB|Q04747', 'pilF|A0A290TXQ9', 'Foo1|A1X158', 'yfiB|Q9I4L6', 'SRFAA|P27206', 'HfsA|Q9A5L6', 'ompA|A0A3B6XXR4', 'HfsD|Q9A5L5', 'sipW|P54506', 'ChiA|P32823', 'HfsF|Q9A5M1', 'tpbB|A0A0H2Z7X0']	8	srf_hfs_hfacces_foo_chia_yfi_ompu_sdrc	drag-reducing_adhesion_chitinase-production	3	1266052	Psychrosphaera aestuarii
GCA_001681525.1	14	['SRFAC|Q08787', 'ChiA|P32823', 'HfsG|Q9A5M0', 'SRFAD|Q08788', 'HfsH|Q9A5L9', 'OmpU|P0C6Q6', 'yfiB|Q9I4L6', 'SRFAA|P27206', 'ompW|A0A0F4PBB9', 'tpbB|A0A0H2Z7X0', 'sipW|P54506', 'HfsA|Q9A5L6', 'SRFAB|Q04747', 'HfsD|Q9A5L5']	3	srf_chia_ompu	drag-reducing_chitinase-production_adhesion	3	379347	Tritonibacter mobilis
GCA_014879975.1	30	['CHPH|Q9AD92', 'SRFAC|Q08787', 'yfiR|Q9I4L4', 'HfaB|P27343', 'HfsH|Q9A5L9', 'CHPE|Q9X9Z2', 'HfsG|Q9A5M0', 'HfsE|Q9A5M2', 'SRFAD|Q08788', 'OmpU|P0C6Q6', 'HfsC|Q9A5L8', 'CHPA|Q8CJY7', 'SRFAB|Q04747', 'CHPF|Q9KYG7', 'RbmC|A0A2S1ZSI6', 'GbpA|C3LW75', 'CHPG|Q9KYH3', 'yfiB|Q9I4L6', 'SRFAA|P27206', 'Bap1|Q9KQW0', 'CHPC|Q9AD93', 'HfsA|Q9A5L6', 'ompA|A0A3B6XXR4', 'HfsD|Q9A5L5', 'sipW|P54506', 'ChiA|P3282…	9	srf_hfacces_chp_chia_yfi_ompu_bap1_rbmc_gbpa	drag-reducing_adhesion_chitinase-production	3	2777577	Vibrio bathopelagicus
GCA_000422345.1	21	['SRFAC|Q08787', 'yfiR|Q9I4L4', 'sdrC|A0A6A8FED6', 'HfsG|Q9A5M0', 'HfsE|Q9A5M2', 'SRFAD|Q08788', 'OmpU|P0C6Q6', 'HfsC|Q9A5L8', 'SRFAB|Q04747', 'RbmC|A0A2S1ZSI6', 'Foo1|A1X158', 'yfiB|Q9I4L6', 'SRFAA|P27206', 'Bap1|Q9KQW0', 'HfsA|Q9A5L6', 'ompA|A0A3B6XXR4', 'HfsD|Q9A5L5', 'sipW|P54506', 'ChiA|P32823', 'HfsF|Q9A5M1', 'ompW|A0A0F4PBB9']	7	srf_foo_chia_ompu_sdrc_bap1_rbmc	drag-reducing_adhesion_chitinase-production	3	1122224	Spongiibacter marinus
GCA_000379465.1	16	['GbpA|C3LW75', 'ompA|A0A3B6XXR4', 'SRFAC|Q08787', 'ChiA|P32823', 'HfsG|Q9A5M0', 'HfsF|Q9A5M1', 'SRFAD|Q08788', 'HfsH|Q9A5L9', 'yfiB|Q9I4L6', 'sipW|P54506', 'SRFAA|P27206', 'Bap1|Q9KQW0', 'sdrC|A0A6A8FED6', 'SRFAB|Q04747', 'HfsD|Q9A5L5', 'RbmC|A0A2S1ZSI6']	6	srf_chia_sdrc_bap1_rbmc_gbpa	drag-reducing_chitinase-production_adhesion	3	1123244	Sciscionella marina
GCA_000256245.1	18	['GbpA|C3LW75', 'ompA|A0A3B6XXR4', 'SRFAC|Q08787', 'ChiA|P32823', 'HfsG|Q9A5M0', 'HfaB|P27343', 'SRFAD|Q08788', 'HfsH|Q9A5L9', 'OmpU|P0C6Q6', 'yfiB|Q9I4L6', 'SRFAA|P27206', 'HfsC|Q9A5L8', 'tpbB|A0A0H2Z7X0', 'ompW|A0A0F4PBB9', 'sipW|P54506', 'HfsA|Q9A5L6', 'SRFAB|Q04747', 'HfsD|Q9A5L5']	5	srf_hfacces_chia_ompu_gbpa	drag-reducing_adhesion_chitinase-production	3	1136165	Vibrio cyclitrophicus
GCA_001681385.1	14	['SRFAC|Q08787', 'ChiA|P32823', 'HfsG|Q9A5M0', 'SRFAD|Q08788', 'HfsH|Q9A5L9', 'OmpU|P0C6Q6', 'yfiB|Q9I4L6', 'SRFAA|P27206', 'ompW|A0A0F4PBB9', 'tpbB|A0A0H2Z7X0', 'sipW|P54506', 'HfsA|Q9A5L6', 'SRFAB|Q04747', 'HfsD|Q9A5L5']	3	srf_chia_ompu	drag-reducing_chitinase-production_adhesion	3	379347	Tritonibacter mobilis
GCA_001681955.1	14	['SRFAC|Q08787', 'ChiA|P32823', 'HfsG|Q9A5M0', 'SRFAD|Q08788', 'HfsH|Q9A5L9', 'OmpU|P0C6Q6', 'yfiB|Q9I4L6', 'SRFAA|P27206', 'ompW|A0A0F4PBB9', 'tpbB|A0A0H2Z7X0', 'sipW|P54506', 'HfsA|Q9A5L6', 'SRFAB|Q04747', 'HfsD|Q9A5L5']	3	srf_chia_ompu	drag-reducing_chitinase-production_adhesion	3	379347	Tritonibacter mobilis
GCA_004360155.1	22	['SRFAC|Q08787', 'HfaB|P27343', 'HfsH|Q9A5L9', 'sdrC|A0A6A8FED6', 'HfsG|Q9A5M0', 'HfsE|Q9A5M2', 'SRFAD|Q08788', 'OmpU|P0C6Q6', 'HfsC|Q9A5L8', 'SRFAB|Q04747', 'GbpA|C3LW75', 'pilF|A0A290TXQ9', 'Foo1|A1X158', 'yfiB|Q9I4L6', 'SRFAA|P27206', 'HfsA|Q9A5L6', 'ompA|A0A3B6XXR4', 'HfsD|Q9A5L5', 'sipW|P54506', 'ChiA|P32823', 'HfsF|Q9A5M1', 'ompW|A0A0F4PBB9']	9	srf_hfs_hfacces_foo_chia_omp_ompu_sdrc_gbpa	drag-reducing_adhesion_chitinase-production	3	2500157	Paraglaciecola marina
GCA_000276645.1	24	['SRFAC|Q08787', 'yfiR|Q9I4L4', 'HfaB|P27343', 'HfsH|Q9A5L9', 'sdrC|A0A6A8FED6', 'HfsG|Q9A5M0', 'HfsE|Q9A5M2', 'SRFAD|Q08788', 'OmpU|P0C6Q6', 'HfsC|Q9A5L8', 'SRFAB|Q04747', 'GbpA|C3LW75', 'pilF|A0A290TXQ9', 'Foo1|A1X158', 'yfiB|Q9I4L6', 'SRFAA|P27206', 'Bap1|Q9KQW0', 'HfsA|Q9A5L6', 'ompA|A0A3B6XXR4', 'HfsD|Q9A5L5', 'sipW|P54506', 'ChiA|P32823', 'ompW|A0A0F4PBB9', 'tpbB|A0A0H2Z7X0']	10	srf_hfacces_foo_chia_omp_yfi_ompu_sdrc_bap1_gbpa	drag-reducing_adhesion_chitinase-production	3	493915	Pseudoalteromonas sp. NJ631
GCA_001681445.1	14	['SRFAC|Q08787', 'ChiA|P32823', 'HfsG|Q9A5M0', 'SRFAD|Q08788', 'HfsH|Q9A5L9', 'OmpU|P0C6Q6', 'yfiB|Q9I4L6', 'SRFAA|P27206', 'ompW|A0A0F4PBB9', 'tpbB|A0A0H2Z7X0', 'sipW|P54506', 'HfsA|Q9A5L6', 'SRFAB|Q04747', 'HfsD|Q9A5L5']	3	srf_chia_ompu	drag-reducing_chitinase-production_adhesion	3	379347	Tritonibacter mobilis
GCA_013403985.1	15	['SRFAC|Q08787', 'ChiA|P32823', 'HfsG|Q9A5M0', 'HfsE|Q9A5M2', 'SRFAD|Q08788', 'HfsH|Q9A5L9', 'OmpU|P0C6Q6', 'yfiB|Q9I4L6', 'SRFAA|P27206', 'HfsC|Q9A5L8', 'sipW|P54506', 'sdrC|A0A6A8FED6', 'HfsA|Q9A5L6', 'SRFAB|Q04747', 'HfsD|Q9A5L5']	4	srf_chia_ompu_sdrc	drag-reducing_chitinase-production_adhesion	3	2686076	Winogradskyella ludwigii
GCA_000473205.1	16	['SRFAC|Q08787', 'HfsG|Q9A5M0', 'GalL|C0HLX7', 'HfsF|Q9A5M1', 'SRFAD|Q08788', 'HfsH|Q9A5L9', 'OmpU|P0C6Q6', 'yfiB|Q9I4L6', 'SRFAA|P27206', 'HfsC|Q9A5L8', 'tpbB|A0A0H2Z7X0', 'ompW|A0A0F4PBB9', 'sipW|P54506', 'HfsA|Q9A5L6', 'SRFAB|Q04747', 'HfsD|Q9A5L5']	3	srf_gal_ompu	drag-reducing_colonization-resistance_adhesion	3	999550	Pseudophaeobacter arcticus
GCA_000373985.1	18	['SRFAC|Q08787', 'ChiA|P32823', 'HfsG|Q9A5M0', 'yfiR|Q9I4L4', 'HfsE|Q9A5M2', 'HfsF|Q9A5M1', 'HfaB|P27343', 'SRFAD|Q08788', 'HfsH|Q9A5L9', 'OmpU|P0C6Q6', 'yfiB|Q9I4L6', 'SRFAA|P27206', 'HfsC|Q9A5L8', 'sipW|P54506', 'sdrC|A0A6A8FED6', 'HfsA|Q9A5L6', 'SRFAB|Q04747', 'HfsD|Q9A5L5']	6	srf_hfs_hfacces_chia_ompu_sdrc	drag-reducing_adhesion_chitinase-production	3	1121396	Desulfobacter curvatus
GCA_009746565.1	18	['SRFAC|Q08787', 'ChiA|P32823', 'HfsG|Q9A5M0', 'HfsE|Q9A5M2', 'HfsF|Q9A5M1', 'HfaB|P27343', 'SRFAD|Q08788', 'HfsH|Q9A5L9', 'yfiB|Q9I4L6', 'sipW|P54506', 'SRFAA|P27206', 'HfsC|Q9A5L8', 'Bap1|Q9KQW0', 'sdrC|A0A6A8FED6', 'HfsA|Q9A5L6', 'SRFAB|Q04747', 'HfsD|Q9A5L5', 'RbmC|A0A2S1ZSI6']	7	srf_hfs_hfacces_chia_sdrc_bap1_rbmc	drag-reducing_adhesion_chitinase-production	3	2682493	Mariniflexile maritimum
GCA_005281835.1	20	['SRFAC|Q08787', 'yfiR|Q9I4L4', 'HfaB|P27343', 'HfsH|Q9A5L9', 'sdrC|A0A6A8FED6', 'HfsG|Q9A5M0', 'SRFAD|Q08788', 'OmpU|P0C6Q6', 'HfsC|Q9A5L8', 'SRFAB|Q04747', 'GbpA|C3LW75', 'yfiB|Q9I4L6', 'SRFAA|P27206', 'HfsA|Q9A5L6', 'ompA|A0A3B6XXR4', 'HfsD|Q9A5L5', 'sipW|P54506', 'ChiA|P32823', 'ompW|A0A0F4PBB9', 'tpbB|A0A0H2Z7X0']	7	srf_hfacces_chia_yfi_ompu_sdrc_gbpa	drag-reducing_adhesion_chitinase-production	3	1774960	Vibrio profundi
GCA_000620085.1	20	['SRFAC|Q08787', 'HfaB|P27343', 'HfsH|Q9A5L9', 'HfsG|Q9A5M0', 'HfsE|Q9A5M2', 'SRFAD|Q08788', 'OmpU|P0C6Q6', 'HfsC|Q9A5L8', 'SRFAB|Q04747', 'RbmC|A0A2S1ZSI6', 'Foo1|A1X158', 'yfiB|Q9I4L6', 'SRFAA|P27206', 'Bap1|Q9KQW0', 'HfsA|Q9A5L6', 'HfsD|Q9A5L5', 'sipW|P54506', 'ChiA|P32823', 'HfsF|Q9A5M1', 'tpbB|A0A0H2Z7X0']	8	srf_hfs_hfacces_foo_chia_ompu_bap1_rbmc	drag-reducing_adhesion_chitinase-production	3	1122200	Marinobacterium jannaschii
GCA_000422525.1	17	['SRFAC|Q08787', 'ChiA|P32823', 'HfsG|Q9A5M0', 'HfsF|Q9A5M1', 'HfaB|P27343', 'SRFAD|Q08788', 'HfsH|Q9A5L9', 'OmpU|P0C6Q6', 'yfiB|Q9I4L6', 'SRFAA|P27206', 'HfsC|Q9A5L8', 'Bap1|Q9KQW0', 'sipW|P54506', 'HfsA|Q9A5L6', 'SRFAB|Q04747', 'HfsD|Q9A5L5', 'RbmC|A0A2S1ZSI6']	6	srf_hfacces_chia_ompu_bap1_rbmc	drag-reducing_adhesion_chitinase-production	3	1121434	Halodesulfovibrio aestuarii
GCA_013623835.1	18	['ompA|A0A3B6XXR4', 'SRFAC|Q08787', 'ChiA|P32823', 'HfsG|Q9A5M0', 'Foo1|A1X158', 'yfiR|Q9I4L4', 'HfsF|Q9A5M1', 'SRFAD|Q08788', 'HfsH|Q9A5L9', 'yfiB|Q9I4L6', 'sipW|P54506', 'SRFAA|P27206', 'HfsC|Q9A5L8', 'tpbB|A0A0H2Z7X0', 'sdrC|A0A6A8FED6', 'HfsA|Q9A5L6', 'SRFAB|Q04747', 'HfsD|Q9A5L5']	5	srf_foo_chia_yfi_sdrc	drag-reducing_adhesion_chitinase-production	3	358099	Brevibacterium oceani
GCA_013403925.1	17	['SRFAC|Q08787', 'ChiA|P32823', 'HfsG|Q9A5M0', 'Foo1|A1X158', 'HfsE|Q9A5M2', 'HfsF|Q9A5M1', 'SRFAD|Q08788', 'HfsH|Q9A5L9', 'yfiB|Q9I4L6', 'sipW|P54506', 'SRFAA|P27206', 'HfsC|Q9A5L8', 'tpbB|A0A0H2Z7X0', 'sdrC|A0A6A8FED6', 'HfsA|Q9A5L6', 'SRFAB|Q04747', 'HfsD|Q9A5L5']	5	srf_hfs_foo_chia_sdrc	drag-reducing_adhesion_chitinase-production	3	2697007	Winogradskyella wichelsiae
GCA_000256425.1	17	['GbpA|C3LW75', 'SRFAC|Q08787', 'ChiA|P32823', 'HfsG|Q9A5M0', 'HfaB|P27343', 'SRFAD|Q08788', 'HfsH|Q9A5L9', 'OmpU|P0C6Q6', 'yfiB|Q9I4L6', 'SRFAA|P27206', 'HfsC|Q9A5L8', 'tpbB|A0A0H2Z7X0', 'ompW|A0A0F4PBB9', 'sipW|P54506', 'HfsA|Q9A5L6', 'SRFAB|Q04747', 'HfsD|Q9A5L5']	5	srf_hfacces_chia_ompu_gbpa	drag-reducing_adhesion_chitinase-production	3	1136174	Vibrio cyclitrophicus
GCA_000332135.1	18	['SRFAC|Q08787', 'ChiA|P32823', 'HfsG|Q9A5M0', 'Foo1|A1X158', 'HfsE|Q9A5M2', 'HfsF|Q9A5M1', 'HfaB|P27343', 'SRFAD|Q08788', 'HfsH|Q9A5L9', 'yfiB|Q9I4L6', 'sipW|P54506', 'SRFAA|P27206', 'HfsC|Q9A5L8', 'tpbB|A0A0H2Z7X0', 'sdrC|A0A6A8FED6', 'HfsA|Q9A5L6', 'SRFAB|Q04747', 'HfsD|Q9A5L5']	6	srf_hfs_hfacces_foo_chia_sdrc	drag-reducing_adhesion_chitinase-production	3	163908	Anabaena sp. PCC 7108
GCA_001723685.1	18	['ompA|A0A3B6XXR4', 'SRFAC|Q08787', 'ChiA|P32823', 'HfsG|Q9A5M0', 'yfiR|Q9I4L4', 'HfsE|Q9A5M2', 'HfsF|Q9A5M1', 'SRFAD|Q08788', 'HfsH|Q9A5L9', 'OmpU|P0C6Q6', 'yfiB|Q9I4L6', 'SRFAA|P27206', 'HfsC|Q9A5L8', 'sipW|P54506', 'sdrC|A0A6A8FED6', 'HfsA|Q9A5L6', 'SRFAB|Q04747', 'HfsD|Q9A5L5']	5	srf_hfs_chia_ompu_sdrc	drag-reducing_adhesion_chitinase-production	3	1827136	Candidatus Marithrix sp. Canyon 246
GCA_902551335.1	10	['SRFAC|Q08787', 'ChiA|P32823', 'HfsG|Q9A5M0', 'Foo1|A1X158', 'HfsE|Q9A5M2', 'SRFAD|Q08788', 'sipW|P54506', 'SRFAA|P27206', 'SRFAB|Q04747', 'HfsD|Q9A5L5']	3	srf_foo_chia	drag-reducing_adhesion_chitinase-production	3	1985113	uncultured Candidatus Actinomarina sp.
GCA_001681815.1	14	['SRFAC|Q08787', 'ChiA|P32823', 'HfsG|Q9A5M0', 'SRFAD|Q08788', 'HfsH|Q9A5L9', 'OmpU|P0C6Q6', 'yfiB|Q9I4L6', 'SRFAA|P27206', 'ompW|A0A0F4PBB9', 'tpbB|A0A0H2Z7X0', 'sipW|P54506', 'HfsA|Q9A5L6', 'SRFAB|Q04747', 'HfsD|Q9A5L5']	3	srf_chia_ompu	drag-reducing_chitinase-production_adhesion	3	379347	Tritonibacter mobilis
GCA_001682035.1	14	['SRFAC|Q08787', 'ChiA|P32823', 'HfsG|Q9A5M0', 'SRFAD|Q08788', 'HfsH|Q9A5L9', 'OmpU|P0C6Q6', 'yfiB|Q9I4L6', 'SRFAA|P27206', 'ompW|A0A0F4PBB9', 'tpbB|A0A0H2Z7X0', 'sipW|P54506', 'HfsA|Q9A5L6', 'SRFAB|Q04747', 'HfsD|Q9A5L5']	3	srf_chia_ompu	drag-reducing_chitinase-production_adhesion	3	379347	Tritonibacter mobilis
GCA_004360225.1	17	['ompA|A0A3B6XXR4', 'SRFAC|Q08787', 'ChiA|P32823', 'HfsG|Q9A5M0', 'HfsF|Q9A5M1', 'HfaB|P27343', 'SRFAD|Q08788', 'HfsH|Q9A5L9', 'OmpU|P0C6Q6', 'yfiB|Q9I4L6', 'SRFAA|P27206', 'HfsC|Q9A5L8', 'ompW|A0A0F4PBB9', 'sipW|P54506', 'HfsA|Q9A5L6', 'SRFAB|Q04747', 'HfsD|Q9A5L5']	4	srf_hfacces_chia_ompu	drag-reducing_adhesion_chitinase-production	3	2545266	Alcanivorax sp. 24
GCA_016469335.1	23	['SRFAC|Q08787', 'yfiR|Q9I4L4', 'HfaB|P27343', 'HfsH|Q9A5L9', 'sdrC|A0A6A8FED6', 'HfsG|Q9A5M0', 'HfsE|Q9A5M2', 'SRFAD|Q08788', 'OmpU|P0C6Q6', 'HfsC|Q9A5L8', 'SRFAB|Q04747', 'RbmC|A0A2S1ZSI6', 'pilF|A0A290TXQ9', 'yfiB|Q9I4L6', 'SRFAA|P27206', 'Bap1|Q9KQW0', 'HfsA|Q9A5L6', 'ompA|A0A3B6XXR4', 'HfsD|Q9A5L5', 'sipW|P54506', 'ChiA|P32823', 'HfsF|Q9A5M1', 'ompW|A0A0F4PBB9']	9	srf_hfs_hfacces_chia_omp_ompu_sdrc_bap1_rbmc	drag-reducing_adhesion_chitinase-production	3	2744479	Flocculibacter collagenilyticus
GCA_001723665.1	18	['ompA|A0A3B6XXR4', 'SRFAC|Q08787', 'ChiA|P32823', 'HfsG|Q9A5M0', 'yfiR|Q9I4L4', 'HfsE|Q9A5M2', 'HfsF|Q9A5M1', 'SRFAD|Q08788', 'HfsH|Q9A5L9', 'OmpU|P0C6Q6', 'yfiB|Q9I4L6', 'SRFAA|P27206', 'HfsC|Q9A5L8', 'sipW|P54506', 'sdrC|A0A6A8FED6', 'HfsA|Q9A5L6', 'SRFAB|Q04747', 'HfsD|Q9A5L5']	5	srf_hfs_chia_ompu_sdrc	drag-reducing_adhesion_chitinase-production	3	1827136	Candidatus Marithrix sp. Canyon 246
GCA_001681485.1	13	['SRFAC|Q08787', 'ChiA|P32823', 'HfsG|Q9A5M0', 'SRFAD|Q08788', 'HfsH|Q9A5L9', 'OmpU|P0C6Q6', 'yfiB|Q9I4L6', 'SRFAA|P27206', 'ompW|A0A0F4PBB9', 'tpbB|A0A0H2Z7X0', 'HfsA|Q9A5L6', 'SRFAB|Q04747', 'sipW|P54506']	3	srf_chia_ompu	drag-reducing_chitinase-production_adhesion	3	379347	Tritonibacter mobilis
GCA_001681335.1	14	['SRFAC|Q08787', 'ChiA|P32823', 'HfsG|Q9A5M0', 'SRFAD|Q08788', 'HfsH|Q9A5L9', 'OmpU|P0C6Q6', 'yfiB|Q9I4L6', 'SRFAA|P27206', 'ompW|A0A0F4PBB9', 'tpbB|A0A0H2Z7X0', 'sipW|P54506', 'HfsA|Q9A5L6', 'SRFAB|Q04747', 'HfsD|Q9A5L5']	3	srf_chia_ompu	drag-reducing_chitinase-production_adhesion	3	379347	Tritonibacter mobilis
GCA_014154995.1	18	['pilF|A0A290TXQ9', 'SRFAC|Q08787', 'ChiA|P32823', 'HfsG|Q9A5M0', 'Foo1|A1X158', 'HfsE|Q9A5M2', 'HfsF|Q9A5M1', 'SRFAD|Q08788', 'HfsH|Q9A5L9', 'yfiB|Q9I4L6', 'sipW|P54506', 'SRFAA|P27206', 'HfsC|Q9A5L8', 'Bap1|Q9KQW0', 'HfsA|Q9A5L6', 'SRFAB|Q04747', 'HfsD|Q9A5L5', 'RbmC|A0A2S1ZSI6']	6	srf_hfs_foo_chia_bap1_rbmc	drag-reducing_adhesion_chitinase-production	3	2728037	Tautonia rosea
GCA_000262345.1	24	['CHPH|Q9AD92', 'SRFAC|Q08787', 'HfsH|Q9A5L9', 'CHPE|Q9X9Z2', 'HfsG|Q9A5M0', 'HfsE|Q9A5M2', 'SRFAD|Q08788', 'HfsC|Q9A5L8', 'CHPA|Q8CJY7', 'SRFAB|Q04747', 'CHPF|Q9KYG7', 'GbpA|C3LW75', 'CHPG|Q9KYH3', 'yfiB|Q9I4L6', 'SRFAA|P27206', 'CHPC|Q9AD93', 'HfsA|Q9A5L6', 'ompA|A0A3B6XXR4', 'HfsD|Q9A5L5', 'sipW|P54506', 'ChiA|P32823', 'CHPD|Q9L1J9', 'HfsF|Q9A5M1', 'CHPB|Q9X7U2']	5	srf_hfs_chp_chia_gbpa	drag-reducing_adhesion_chitinase-production	3	1565415	Streptomyces xiaopingdaonensis
GCA_001681975.1	14	['SRFAC|Q08787', 'ChiA|P32823', 'HfsG|Q9A5M0', 'SRFAD|Q08788', 'HfsH|Q9A5L9', 'OmpU|P0C6Q6', 'yfiB|Q9I4L6', 'SRFAA|P27206', 'ompW|A0A0F4PBB9', 'tpbB|A0A0H2Z7X0', 'sipW|P54506', 'HfsA|Q9A5L6', 'SRFAB|Q04747', 'HfsD|Q9A5L5']	3	srf_chia_ompu	drag-reducing_chitinase-production_adhesion	3	379347	Tritonibacter mobilis
GCA_006381105.1	19	['SRFAC|Q08787', 'HfaB|P27343', 'HfsH|Q9A5L9', 'sdrC|A0A6A8FED6', 'HfsG|Q9A5M0', 'HfsE|Q9A5M2', 'SRFAD|Q08788', 'OmpU|P0C6Q6', 'HfsC|Q9A5L8', 'SRFAB|Q04747', 'RbmC|A0A2S1ZSI6', 'yfiB|Q9I4L6', 'SRFAA|P27206', 'Bap1|Q9KQW0', 'HfsA|Q9A5L6', 'sipW|P54506', 'HfsD|Q9A5L5', 'ChiA|P32823', 'HfsF|Q9A5M1']	8	srf_hfs_hfacces_chia_ompu_sdrc_bap1_rbmc	drag-reducing_adhesion_chitinase-production	3	2585141	Flavicella sediminum
GCA_001661495.1	22	['SRFAC|Q08787', 'yfiR|Q9I4L4', 'HfaB|P27343', 'HfsH|Q9A5L9', 'sdrC|A0A6A8FED6', 'HfsG|Q9A5M0', 'HfsE|Q9A5M2', 'SRFAD|Q08788', 'OmpU|P0C6Q6', 'HfsC|Q9A5L8', 'SRFAB|Q04747', 'GbpA|C3LW75', 'Foo1|A1X158', 'yfiB|Q9I4L6', 'SRFAA|P27206', 'HfsA|Q9A5L6', 'ompA|A0A3B6XXR4', 'HfsD|Q9A5L5', 'sipW|P54506', 'ChiA|P32823', 'HfsF|Q9A5M1', 'ompW|A0A0F4PBB9']	8	srf_hfs_hfacces_foo_chia_ompu_sdrc_gbpa	drag-reducing_adhesion_chitinase-production	3	1315282	Pseudoalteromonas prydzensis
GCA_001681515.1	14	['SRFAC|Q08787', 'ChiA|P32823', 'HfsG|Q9A5M0', 'SRFAD|Q08788', 'HfsH|Q9A5L9', 'OmpU|P0C6Q6', 'yfiB|Q9I4L6', 'SRFAA|P27206', 'ompW|A0A0F4PBB9', 'tpbB|A0A0H2Z7X0', 'sipW|P54506', 'HfsA|Q9A5L6', 'SRFAB|Q04747', 'HfsD|Q9A5L5']	3	srf_chia_ompu	drag-reducing_chitinase-production_adhesion	3	379347	Tritonibacter mobilis
GCA_000444805.1	18	['bslA|P71014', 'ompA|A0A3B6XXR4', 'SRFAC|Q08787', 'ChiA|P32823', 'HfsG|Q9A5M0', 'HfsF|Q9A5M1', 'SRFAD|Q08788', 'HfsH|Q9A5L9', 'yfiB|Q9I4L6', 'sipW|P54506', 'SRFAA|P27206', 'HfsC|Q9A5L8', 'tasA|P54507', 'sdrC|A0A6A8FED6', 'HfsA|Q9A5L6', 'SRFAB|Q04747', 'HfsD|Q9A5L5', 'bslB|P39632']	5	bsl_srf_chia_tapA_sdrc	drag-reducing_chitinase-production_adhesion	3	561879	Bacillus safensis
GCA_001681905.1	14	['SRFAC|Q08787', 'ChiA|P32823', 'HfsG|Q9A5M0', 'SRFAD|Q08788', 'HfsH|Q9A5L9', 'OmpU|P0C6Q6', 'yfiB|Q9I4L6', 'SRFAA|P27206', 'ompW|A0A0F4PBB9', 'tpbB|A0A0H2Z7X0', 'sipW|P54506', 'HfsA|Q9A5L6', 'SRFAB|Q04747', 'HfsD|Q9A5L5']	3	srf_chia_ompu	drag-reducing_chitinase-production_adhesion	3	379347	Tritonibacter mobilis
GCA_000259875.1	19	['SRFAC|Q08787', 'HfaB|P27343', 'HfsH|Q9A5L9', 'HfsG|Q9A5M0', 'HfsE|Q9A5M2', 'SRFAD|Q08788', 'OmpU|P0C6Q6', 'HfsC|Q9A5L8', 'SRFAB|Q04747', 'GbpA|C3LW75', 'yfiB|Q9I4L6', 'SRFAA|P27206', 'HfsA|Q9A5L6', 'ompA|A0A3B6XXR4', 'sipW|P54506', 'HfsD|Q9A5L5', 'ChiA|P32823', 'ompW|A0A0F4PBB9', 'tpbB|A0A0H2Z7X0']	5	srf_hfacces_chia_ompu_gbpa	drag-reducing_adhesion_chitinase-production	3	1088888	Vibrio campbellii
GCA_000716085.1	25	['CHPH|Q9AD92', 'SRFAC|Q08787', 'HfsH|Q9A5L9', 'sdrC|A0A6A8FED6', 'CHPE|Q9X9Z2', 'HfsG|Q9A5M0', 'HfsE|Q9A5M2', 'SRFAD|Q08788', 'HfsC|Q9A5L8', 'CHPA|Q8CJY7', 'SRFAB|Q04747', 'CHPF|Q9KYG7', 'GbpA|C3LW75', 'CHPG|Q9KYH3', 'yfiB|Q9I4L6', 'SRFAA|P27206', 'CHPC|Q9AD93', 'HfsA|Q9A5L6', 'ompA|A0A3B6XXR4', 'HfsD|Q9A5L5', 'sipW|P54506', 'ChiA|P32823', 'CHPD|Q9L1J9', 'HfsF|Q9A5M1', 'CHPB|Q9X7U2']	6	srf_hfs_chp_chia_sdrc_gbpa	drag-reducing_adhesion_chitinase-production	3	1463834	Streptomyces sp. NRRL B-24501
GCA_012931685.1	14	['ChiA|P32823', 'HfsG|Q9A5M0', 'GalL|C0HLX7', 'HfsE|Q9A5M2', 'HfsF|Q9A5M1', 'HfsH|Q9A5L9', 'SRFAD|Q08788', 'yfiB|Q9I4L6', 'sipW|P54506', 'HfsC|Q9A5L8', 'tpbB|A0A0H2Z7X0', 'sdrC|A0A6A8FED6', 'HfsA|Q9A5L6', 'HfsD|Q9A5L5']	4	hfs_chia_gal_sdrc	adhesion_chitinase-production_colonization-resistance	3	2042995	Hanstruepera ponticola
GCA_001681535.1	14	['SRFAC|Q08787', 'ChiA|P32823', 'HfsG|Q9A5M0', 'SRFAD|Q08788', 'HfsH|Q9A5L9', 'OmpU|P0C6Q6', 'yfiB|Q9I4L6', 'SRFAA|P27206', 'ompW|A0A0F4PBB9', 'tpbB|A0A0H2Z7X0', 'sipW|P54506', 'HfsA|Q9A5L6', 'SRFAB|Q04747', 'HfsD|Q9A5L5']	3	srf_chia_ompu	drag-reducing_chitinase-production_adhesion	3	379347	Tritonibacter mobilis
GCA_001681415.1	14	['SRFAC|Q08787', 'ChiA|P32823', 'HfsG|Q9A5M0', 'SRFAD|Q08788', 'HfsH|Q9A5L9', 'OmpU|P0C6Q6', 'yfiB|Q9I4L6', 'SRFAA|P27206', 'ompW|A0A0F4PBB9', 'tpbB|A0A0H2Z7X0', 'sipW|P54506', 'HfsA|Q9A5L6', 'SRFAB|Q04747', 'HfsD|Q9A5L5']	3	srf_chia_ompu	drag-reducing_chitinase-production_adhesion	3	379347	Tritonibacter mobilis
GCA_001681365.1	15	['SRFAC|Q08787', 'ChiA|P32823', 'HfsG|Q9A5M0', 'HfaB|P27343', 'SRFAD|Q08788', 'HfsH|Q9A5L9', 'OmpU|P0C6Q6', 'yfiB|Q9I4L6', 'SRFAA|P27206', 'ompW|A0A0F4PBB9', 'tpbB|A0A0H2Z7X0', 'sipW|P54506', 'HfsA|Q9A5L6', 'SRFAB|Q04747', 'HfsD|Q9A5L5']	4	srf_hfacces_chia_ompu	drag-reducing_adhesion_chitinase-production	3	379347	Tritonibacter mobilis
GCA_000688315.1	19	['SRFAC|Q08787', 'HfsH|Q9A5L9', 'sdrC|A0A6A8FED6', 'HfsG|Q9A5M0', 'HfsE|Q9A5M2', 'SRFAD|Q08788', 'OmpU|P0C6Q6', 'HfsC|Q9A5L8', 'SRFAB|Q04747', 'Foo1|A1X158', 'yfiB|Q9I4L6', 'SRFAA|P27206', 'HfsA|Q9A5L6', 'ompA|A0A3B6XXR4', 'sipW|P54506', 'HfsD|Q9A5L5', 'ChiA|P32823', 'HfsF|Q9A5M1', 'tpbB|A0A0H2Z7X0']	6	srf_hfs_foo_chia_ompu_sdrc	drag-reducing_adhesion_chitinase-production	3	1249997	Maribacter sp. Hel_I_7
GCA_012958305.1	18	['pilF|A0A290TXQ9', 'SRFAC|Q08787', 'ChiA|P32823', 'HfsG|Q9A5M0', 'Foo1|A1X158', 'HfsE|Q9A5M2', 'HfsF|Q9A5M1', 'SRFAD|Q08788', 'HfsH|Q9A5L9', 'yfiB|Q9I4L6', 'sipW|P54506', 'SRFAA|P27206', 'HfsC|Q9A5L8', 'Bap1|Q9KQW0', 'HfsA|Q9A5L6', 'SRFAB|Q04747', 'HfsD|Q9A5L5', 'RbmC|A0A2S1ZSI6']	6	srf_hfs_foo_chia_bap1_rbmc	drag-reducing_adhesion_chitinase-production	3	2728037	Tautonia rosea
GCA_900106965.1	16	['SRFAA|P27206', 'SRFAB|Q04747', 'HfsD|Q9A5L5', 'OmpU|P0C6Q6', 'HfsF|Q9A5M1', 'HfsG|Q9A5M0', 'HfsH|Q9A5L9', 'sdrC|A0A6A8FED6', 'SRFAC|Q08787', 'yfiB|Q9I4L6', 'ompW|A0A0F4PBB9', 'sipW|P54506', 'HfsC|Q9A5L8', 'HfaB|P27343', 'HfsA|Q9A5L6', 'SRFAD|Q08788']	4	srf_hfacces_ompu_sdrc	drag-reducing_adhesion	2	1208324	Celeribacter indicus
GCA_014076885.1	18	['HfsD|Q9A5L5', 'Foo1|A1X158', 'HfsF|Q9A5M1', 'HfsH|Q9A5L9', 'HfsG|Q9A5M0', 'OmpU|P0C6Q6', 'sdrC|A0A6A8FED6', 'yfiB|Q9I4L6', 'ompW|A0A0F4PBB9', 'GbpA|C3LW75', 'pilF|A0A290TXQ9', 'sipW|P54506', 'ChiA|P32823', 'HfsC|Q9A5L8', 'yfiR|Q9I4L4', 'HfaB|P27343', 'HfsA|Q9A5L6', 'SRFAD|Q08788']	6	hfacces_foo_chia_ompu_sdrc_gbpa	adhesion_chitinase-production	2	2759813	Colwellia sp. MB3u-22
GCA_002713405.1	17	['HfsD|Q9A5L5', 'Foo1|A1X158', 'HfsF|Q9A5M1', 'HfsE|Q9A5M2', 'HfsH|Q9A5L9', 'HfsG|Q9A5M0', 'sdrC|A0A6A8FED6', 'yfiB|Q9I4L6', 'sipW|P54506', 'RbmC|A0A2S1ZSI6', 'ChiA|P32823', 'HfsC|Q9A5L8', 'yfiR|Q9I4L4', 'HfaB|P27343', 'HfsA|Q9A5L6', 'Bap1|Q9KQW0', 'SRFAD|Q08788']	7	hfs_hfacces_foo_chia_sdrc_bap1_rbmc	adhesion_chitinase-production	2	2026728	Crocinitomicaceae bacterium
GCA_001304105.1	12	['HfsD|Q9A5L5', 'HfsF|Q9A5M1', 'HfsH|Q9A5L9', 'HfsG|Q9A5M0', 'yfiB|Q9I4L6', 'sipW|P54506', 'RbmC|A0A2S1ZSI6', 'ChiA|P32823', 'HfaB|P27343', 'HfsA|Q9A5L6', 'Bap1|Q9KQW0', 'SRFAD|Q08788']	4	hfacces_chia_bap1_rbmc	adhesion_chitinase-production	2	1703399	Deltaproteobacteria bacterium SM23_61
GCA_002688135.1	11	['HfsF|Q9A5M1', 'HfsE|Q9A5M2', 'HfsH|Q9A5L9', 'HfsG|Q9A5M0', 'sdrC|A0A6A8FED6', 'sipW|P54506', 'RbmC|A0A2S1ZSI6', 'ChiA|P32823', 'HfsC|Q9A5L8', 'HfsA|Q9A5L6', 'Bap1|Q9KQW0']	4	chia_sdrc_bap1_rbmc	chitinase-production_adhesion	2	2026774	Parcubacteria group bacterium
GCA_002729575.1	14	['HfsD|Q9A5L5', 'OmpU|P0C6Q6', 'HfsF|Q9A5M1', 'HfsE|Q9A5M2', 'HfsH|Q9A5L9', 'HfsG|Q9A5M0', 'tpbB|A0A0H2Z7X0', 'yfiB|Q9I4L6', 'sipW|P54506', 'RbmC|A0A2S1ZSI6', 'ChiA|P32823', 'HfsC|Q9A5L8', 'Bap1|Q9KQW0', 'SRFAD|Q08788']	4	chia_ompu_bap1_rbmc	chitinase-production_adhesion	2	1899355	Oceanospirillaceae bacterium
GCA_002726605.1	15	['SRFAA|P27206', 'SRFAB|Q04747', 'HfsD|Q9A5L5', 'HfsF|Q9A5M1', 'bslB|P39632', 'HfsG|Q9A5M0', 'HfsH|Q9A5L9', 'sdrC|A0A6A8FED6', 'SRFAC|Q08787', 'yfiB|Q9I4L6', 'sipW|P54506', 'HfsC|Q9A5L8', 'HfaB|P27343', 'HfsA|Q9A5L6', 'bslA|P71014']	3	bsl_hfacces_sdrc	drag-reducing_adhesion	2	2026781	Candidatus Poribacteria bacterium
GCA_001691135.1	17	['HfsD|Q9A5L5', 'OmpU|P0C6Q6', 'HfsF|Q9A5M1', 'HfsE|Q9A5M2', 'HfsH|Q9A5L9', 'HfsG|Q9A5M0', 'tpbB|A0A0H2Z7X0', 'ompA|A0A3B6XXR4', 'yfiB|Q9I4L6', 'GbpA|C3LW75', 'sipW|P54506', 'ChiA|P32823', 'HfsC|Q9A5L8', 'yfiR|Q9I4L4', 'HfaB|P27343', 'HfsA|Q9A5L6', 'SRFAD|Q08788']	6	hfs_hfacces_chia_yfi_ompu_gbpa	adhesion_chitinase-production	2	668	Aliivibrio fischeri
GCA_002699065.1	13	['HfsD|Q9A5L5', 'OmpU|P0C6Q6', 'HfsF|Q9A5M1', 'HfsE|Q9A5M2', 'HfsH|Q9A5L9', 'HfsG|Q9A5M0', 'tpbB|A0A0H2Z7X0', 'sdrC|A0A6A8FED6', 'yfiB|Q9I4L6', 'sipW|P54506', 'ChiA|P32823', 'HfsC|Q9A5L8', 'SRFAD|Q08788']	3	chia_ompu_sdrc	chitinase-production_adhesion	2	2024856	Roseibacillus sp.
GCA_000168915.3	21	['SRFAB|Q04747', 'ompA|A0A3B6XXR4', 'HfaB|P27343', 'SRFAA|P27206', 'OmpU|P0C6Q6', 'tpbB|A0A0H2Z7X0', 'RbmC|A0A2S1ZSI6', 'Bap1|Q9KQW0', 'HfsD|Q9A5L5', 'HfsF|Q9A5M1', 'HfsE|Q9A5M2', 'HfsG|Q9A5M0', 'HfsH|Q9A5L9', 'yfiB|Q9I4L6', 'sipW|P54506', 'ChiA|P32823', 'HfsC|Q9A5L8', 'HfsA|Q9A5L6', 'sdrC|A0A6A8FED6', 'GbpA|C3LW75', 'SRFAD|Q08788']	8	hfs_hfacces_chia_ompu_sdrc_bap1_rbmc_gbpa	adhesion_chitinase-production	2	412614	Vibrio cholerae
GCA_014062315.1	17	['SRFAA|P27206', 'SRFAB|Q04747', 'HfsD|Q9A5L5', 'Foo1|A1X158', 'HfsF|Q9A5M1', 'HfsE|Q9A5M2', 'HfsG|Q9A5M0', 'HfsH|Q9A5L9', 'tpbB|A0A0H2Z7X0', 'sdrC|A0A6A8FED6', 'SRFAC|Q08787', 'ompA|A0A3B6XXR4', 'yfiB|Q9I4L6', 'sipW|P54506', 'HfsC|Q9A5L8', 'HfsA|Q9A5L6', 'SRFAD|Q08788']	4	srf_hfs_foo_sdrc	drag-reducing_adhesion	2	2761487	Gelidibacter maritimus
GCA_001632025.1	10	['HfsF|Q9A5M1', 'HfsE|Q9A5M2', 'HfsG|Q9A5M0', 'tpbB|A0A0H2Z7X0', 'yfiB|Q9I4L6', 'sipW|P54506', 'ChiA|P32823', 'HfsC|Q9A5L8', 'HfaB|P27343', 'SRFAD|Q08788']	2	hfacces_chia	adhesion_chitinase-production	2	1801625	Prochlorococcus marinus
GCA_002694205.1	14	['SRFAA|P27206', 'SRFAB|Q04747', 'HfsD|Q9A5L5', 'OmpU|P0C6Q6', 'HfsF|Q9A5M1', 'HfsG|Q9A5M0', 'HfsH|Q9A5L9', 'yfiB|Q9I4L6', 'ompW|A0A0F4PBB9', 'ChiA|P32823', 'HfsC|Q9A5L8', 'HfaB|P27343', 'HfsA|Q9A5L6', 'SRFAD|Q08788']	3	hfacces_chia_ompu	adhesion_chitinase-production	2	1874361	Idiomarina sp.
GCA_003172875.1	15	['HfsD|Q9A5L5', 'OmpU|P0C6Q6', 'HfsF|Q9A5M1', 'HfsE|Q9A5M2', 'HfsH|Q9A5L9', 'HfsG|Q9A5M0', 'tpbB|A0A0H2Z7X0', 'sdrC|A0A6A8FED6', 'ompA|A0A3B6XXR4', 'yfiB|Q9I4L6', 'sipW|P54506', 'ChiA|P32823', 'HfsC|Q9A5L8', 'HfsA|Q9A5L6', 'SRFAD|Q08788']	4	hfs_chia_ompu_sdrc	adhesion_chitinase-production	2	1247513	Leucothrix pacifica
GCA_000176215.1	18	['HfsD|Q9A5L5', 'OmpU|P0C6Q6', 'HfsF|Q9A5M1', 'HfsE|Q9A5M2', 'HfsH|Q9A5L9', 'HfsG|Q9A5M0', 'ompA|A0A3B6XXR4', 'yfiB|Q9I4L6', 'ompW|A0A0F4PBB9', 'GbpA|C3LW75', 'sipW|P54506', 'RbmC|A0A2S1ZSI6', 'ChiA|P32823', 'HfsC|Q9A5L8', 'HfaB|P27343', 'HfsA|Q9A5L6', 'Bap1|Q9KQW0', 'SRFAD|Q08788']	7	hfs_hfacces_chia_ompu_bap1_rbmc_gbpa	adhesion_chitinase-production	2	1481663	Vibrio metoecus
GCA_015207255.1	14	['HfsD|Q9A5L5', 'HfsF|Q9A5M1', 'HfsE|Q9A5M2', 'HfsH|Q9A5L9', 'HfsG|Q9A5M0', 'tpbB|A0A0H2Z7X0', 'tasA|P54507', 'sdrC|A0A6A8FED6', 'ompA|A0A3B6XXR4', 'sipW|P54506', 'ChiA|P32823', 'HfsC|Q9A5L8', 'HfsA|Q9A5L6', 'SRFAD|Q08788']	4	hfs_chia_tapA_sdrc	adhesion_chitinase-production	2	915328	Romeria gracilis
GCA_900167935.1	12	['HfsD|Q9A5L5', 'Foo1|A1X158', 'HfsG|Q9A5M0', 'HfsE|Q9A5M2', 'HfsH|Q9A5L9', 'tpbB|A0A0H2Z7X0', 'sdrC|A0A6A8FED6', 'yfiB|Q9I4L6', 'sipW|P54506', 'ChiA|P32823', 'HfsC|Q9A5L8', 'HfsA|Q9A5L6']	3	foo_chia_sdrc	adhesion_chitinase-production	2	561365	Maribacter arcticus
GCA_002684595.1	17	['HfsD|Q9A5L5', 'OmpU|P0C6Q6', 'HfsG|Q9A5M0', 'HfsE|Q9A5M2', 'HfsH|Q9A5L9', 'tpbB|A0A0H2Z7X0', 'ompA|A0A3B6XXR4', 'yfiB|Q9I4L6', 'ompW|A0A0F4PBB9', 'pilF|A0A290TXQ9', 'sipW|P54506', 'RbmC|A0A2S1ZSI6', 'ChiA|P32823', 'HfsC|Q9A5L8', 'HfsA|Q9A5L6', 'Bap1|Q9KQW0', 'SRFAD|Q08788']	5	chia_omp_ompu_bap1_rbmc	chitinase-production_adhesion	2	1874826	Novosphingobium sp.
GCA_002725775.1	13	['SRFAA|P27206', 'SRFAB|Q04747', 'HfsD|Q9A5L5', 'HfsF|Q9A5M1', 'HfsE|Q9A5M2', 'HfsG|Q9A5M0', 'HfsH|Q9A5L9', 'ompA|A0A3B6XXR4', 'yfiB|Q9I4L6', 'GbpA|C3LW75', 'ChiA|P32823', 'HfsC|Q9A5L8', 'SRFAD|Q08788']	2	chia_gbpa	chitinase-production_adhesion	2	2026779	Planctomycetaceae bacterium
GCA_002874925.1	17	['HfsD|Q9A5L5', 'OmpU|P0C6Q6', 'HfsG|Q9A5M0', 'HfsE|Q9A5M2', 'HfsH|Q9A5L9', 'tpbB|A0A0H2Z7X0', 'ompA|A0A3B6XXR4', 'yfiB|Q9I4L6', 'ompW|A0A0F4PBB9', 'GbpA|C3LW75', 'sipW|P54506', 'ChiA|P32823', 'HfsC|Q9A5L8', 'yfiR|Q9I4L4', 'HfaB|P27343', 'HfsA|Q9A5L6', 'SRFAD|Q08788']	5	hfacces_chia_yfi_ompu_gbpa	adhesion_chitinase-production	2	136468	Vibrio lentus
GCA_002710215.1	9	['HfsD|Q9A5L5', 'Foo1|A1X158', 'HfsG|Q9A5M0', 'HfsH|Q9A5L9', 'tpbB|A0A0H2Z7X0', 'pilF|A0A290TXQ9', 'sipW|P54506', 'ChiA|P32823', 'SRFAD|Q08788']	2	foo_chia	adhesion_chitinase-production	2	2026724	Chloroflexi bacterium
GCA_002706605.1	14	['HfsD|Q9A5L5', 'OmpU|P0C6Q6', 'HfsF|Q9A5M1', 'HfsE|Q9A5M2', 'HfsH|Q9A5L9', 'HfsG|Q9A5M0', 'sdrC|A0A6A8FED6', 'yfiB|Q9I4L6', 'ompW|A0A0F4PBB9', 'sipW|P54506', 'ChiA|P32823', 'HfsC|Q9A5L8', 'HfsA|Q9A5L6', 'SRFAD|Q08788']	4	hfs_chia_ompu_sdrc	adhesion_chitinase-production	2	34009	Rhodovulum sp.
GCA_002715285.1	13	['SRFAA|P27206', 'SRFAB|Q04747', 'HfsD|Q9A5L5', 'HfsF|Q9A5M1', 'HfsE|Q9A5M2', 'HfsG|Q9A5M0', 'HfsH|Q9A5L9', 'sdrC|A0A6A8FED6', 'yfiB|Q9I4L6', 'sipW|P54506', 'ChiA|P32823', 'HfaB|P27343', 'SRFAD|Q08788']	3	hfacces_chia_sdrc	adhesion_chitinase-production	2	1978231	Acidobacteria bacterium
GCA_000265405.1	12	['HfsD|Q9A5L5', 'HfsF|Q9A5M1', 'HfsE|Q9A5M2', 'HfsH|Q9A5L9', 'HfsG|Q9A5M0', 'sdrC|A0A6A8FED6', 'yfiB|Q9I4L6', 'sipW|P54506', 'ChiA|P32823', 'HfsC|Q9A5L8', 'HfsA|Q9A5L6', 'SRFAD|Q08788']	3	hfs_chia_sdrc	adhesion_chitinase-production	2	866536	Belliella baltica
GCA_002742265.1	14	['HfsD|Q9A5L5', 'Foo1|A1X158', 'HfsG|Q9A5M0', 'HfsH|Q9A5L9', 'OmpU|P0C6Q6', 'tpbB|A0A0H2Z7X0', 'sdrC|A0A6A8FED6', 'yfiB|Q9I4L6', 'ompW|A0A0F4PBB9', 'sipW|P54506', 'ChiA|P32823', 'HfsC|Q9A5L8', 'HfsA|Q9A5L6', 'SRFAD|Q08788']	4	foo_chia_ompu_sdrc	adhesion_chitinase-production	2	1889777	Maribacter sp. 4G9
GCA_003233725.1	18	['HfsD|Q9A5L5', 'Foo1|A1X158', 'HfsF|Q9A5M1', 'HfsE|Q9A5M2', 'HfsH|Q9A5L9', 'HfsG|Q9A5M0', 'OmpU|P0C6Q6', 'sdrC|A0A6A8FED6', 'ompA|A0A3B6XXR4', 'yfiB|Q9I4L6', 'sipW|P54506', 'RbmC|A0A2S1ZSI6', 'ChiA|P32823', 'HfsC|Q9A5L8', 'yfiR|Q9I4L4', 'HfsA|Q9A5L6', 'Bap1|Q9KQW0', 'SRFAD|Q08788']	7	hfs_foo_chia_ompu_sdrc_bap1_rbmc	adhesion_chitinase-production	2	2218606	Mesonia sp. K7
GCA_014163775.1	18	['HfsD|Q9A5L5', 'Foo1|A1X158', 'HfsF|Q9A5M1', 'HfsH|Q9A5L9', 'HfsG|Q9A5M0', 'OmpU|P0C6Q6', 'ompA|A0A3B6XXR4', 'yfiB|Q9I4L6', 'ompW|A0A0F4PBB9', 'GbpA|C3LW75', 'sipW|P54506', 'RbmC|A0A2S1ZSI6', 'ChiA|P32823', 'HfsC|Q9A5L8', 'HfaB|P27343', 'HfsA|Q9A5L6', 'Bap1|Q9KQW0', 'SRFAD|Q08788']	7	hfacces_foo_chia_ompu_bap1_rbmc_gbpa	adhesion_chitinase-production	2	2760938	Shewanella sp. SR43-8
GCA_005047655.1	16	['HfsD|Q9A5L5', 'OmpU|P0C6Q6', 'HfsF|Q9A5M1', 'HfsE|Q9A5M2', 'HfsG|Q9A5M0', 'sdrC|A0A6A8FED6', 'ompA|A0A3B6XXR4', 'yfiB|Q9I4L6', 'ompW|A0A0F4PBB9', 'sipW|P54506', 'ChiA|P32823', 'HfsC|Q9A5L8', 'yfiR|Q9I4L4', 'HfaB|P27343', 'HfsA|Q9A5L6', 'SRFAD|Q08788']	4	hfacces_chia_ompu_sdrc	adhesion_chitinase-production	2	2562283	Sinimarinibacterium sp. CAU 1509
GCA_002876485.1	20	['SRFAB|Q04747', 'ompA|A0A3B6XXR4', 'HfaB|P27343', 'SRFAA|P27206', 'OmpU|P0C6Q6', 'tpbB|A0A0H2Z7X0', 'ompW|A0A0F4PBB9', 'RbmC|A0A2S1ZSI6', 'Bap1|Q9KQW0', 'HfsD|Q9A5L5', 'HfsG|Q9A5M0', 'HfsE|Q9A5M2', 'HfsH|Q9A5L9', 'yfiB|Q9I4L6', 'sipW|P54506', 'ChiA|P32823', 'HfsC|Q9A5L8', 'HfsA|Q9A5L6', 'GbpA|C3LW75', 'SRFAD|Q08788']	6	hfacces_chia_ompu_bap1_rbmc_gbpa	adhesion_chitinase-production	2	212663	Vibrio tasmaniensis
GCA_004323665.1	18	['SRFAA|P27206', 'SRFAB|Q04747', 'HfsD|Q9A5L5', 'OmpU|P0C6Q6', 'HfsF|Q9A5M1', 'HfsE|Q9A5M2', 'HfsG|Q9A5M0', 'HfsH|Q9A5L9', 'ompA|A0A3B6XXR4', 'SRFAC|Q08787', 'yfiB|Q9I4L6', 'ompW|A0A0F4PBB9', 'sipW|P54506', 'HfsC|Q9A5L8', 'yfiR|Q9I4L4', 'HfaB|P27343', 'HfsA|Q9A5L6', 'SRFAD|Q08788']	4	srf_hfs_hfacces_ompu	drag-reducing_adhesion	2	2478971	Escherichia sp. E10V4
GCA_002709045.1	13	['Foo1|A1X158', 'HfsG|Q9A5M0', 'HfsE|Q9A5M2', 'HfsH|Q9A5L9', 'sdrC|A0A6A8FED6', 'tasA|P54507', 'ompA|A0A3B6XXR4', 'yfiB|Q9I4L6', 'sipW|P54506', 'ChiA|P32823', 'HfsC|Q9A5L8', 'HfaB|P27343', 'SRFAD|Q08788']	5	hfacces_foo_chia_tapA_sdrc	adhesion_chitinase-production	2	2026779	Planctomycetaceae bacterium
GCA_002690655.1	14	['HfsD|Q9A5L5', 'Foo1|A1X158', 'HfsF|Q9A5M1', 'HfsE|Q9A5M2', 'HfsG|Q9A5M0', 'ompA|A0A3B6XXR4', 'yfiB|Q9I4L6', 'GbpA|C3LW75', 'sipW|P54506', 'ChiA|P32823', 'HfsC|Q9A5L8', 'yfiR|Q9I4L4', 'HfaB|P27343', 'HfsA|Q9A5L6']	4	hfacces_foo_chia_gbpa	adhesion_chitinase-production	2	2024890	Pedosphaera sp.
GCA_900142005.1	11	['HfsD|Q9A5L5', 'HfsF|Q9A5M1', 'HfsH|Q9A5L9', 'HfsG|Q9A5M0', 'tasA|P54507', 'sipW|P54506', 'RbmC|A0A2S1ZSI6', 'ChiA|P32823', 'HfsC|Q9A5L8', 'HfsA|Q9A5L6', 'Bap1|Q9KQW0']	4	chia_tapA_bap1_rbmc	chitinase-production_adhesion	2	1121476	Dethiosulfatibacter aminovorans
GCA_002723175.1	16	['HfsD|Q9A5L5', 'Foo1|A1X158', 'HfsG|Q9A5M0', 'HfsH|Q9A5L9', 'sdrC|A0A6A8FED6', 'tpbB|A0A0H2Z7X0', 'yfiB|Q9I4L6', 'sipW|P54506', 'RbmC|A0A2S1ZSI6', 'ChiA|P32823', 'HfsC|Q9A5L8', 'yfiR|Q9I4L4', 'HfaB|P27343', 'HfsA|Q9A5L6', 'Bap1|Q9KQW0', 'SRFAD|Q08788']	7	hfacces_foo_chia_yfi_sdrc_bap1_rbmc	adhesion_chitinase-production	2	2026728	Crocinitomicaceae bacterium
GCA_900115105.1	14	['SRFAA|P27206', 'SRFAB|Q04747', 'HfsD|Q9A5L5', 'Foo1|A1X158', 'HfsF|Q9A5M1', 'HfsE|Q9A5M2', 'HfsG|Q9A5M0', 'HfsH|Q9A5L9', 'OmpU|P0C6Q6', 'yfiB|Q9I4L6', 'sipW|P54506', 'ChiA|P32823', 'HfsA|Q9A5L6', 'SRFAD|Q08788']	3	foo_chia_ompu	adhesion_chitinase-production	2	390270	Yoonia tamlensis
GCA_004634185.1	17	['HfsD|Q9A5L5', 'HfsF|Q9A5M1', 'HfsE|Q9A5M2', 'HfsH|Q9A5L9', 'HfsG|Q9A5M0', 'tpbB|A0A0H2Z7X0', 'sdrC|A0A6A8FED6', 'ompA|A0A3B6XXR4', 'yfiB|Q9I4L6', 'ompW|A0A0F4PBB9', 'sipW|P54506', 'RbmC|A0A2S1ZSI6', 'ChiA|P32823', 'HfsC|Q9A5L8', 'HfsA|Q9A5L6', 'Bap1|Q9KQW0', 'SRFAD|Q08788']	5	hfs_chia_sdrc_bap1_rbmc	adhesion_chitinase-production	2	1784713	Flavobacterium arcticum
GCA_002694385.1	16	['SRFAA|P27206', 'SRFAB|Q04747', 'HfsD|Q9A5L5', 'OmpU|P0C6Q6', 'HfsF|Q9A5M1', 'HfsE|Q9A5M2', 'HfsG|Q9A5M0', 'HfsH|Q9A5L9', 'SRFAC|Q08787', 'yfiB|Q9I4L6', 'sipW|P54506', 'RbmC|A0A2S1ZSI6', 'HfaB|P27343', 'HfsA|Q9A5L6', 'Bap1|Q9KQW0', 'SRFAD|Q08788']	5	srf_hfacces_ompu_bap1_rbmc	drag-reducing_adhesion	2	1964365	Sneathiella sp.
GCA_015207445.1	16	['SRFAA|P27206', 'SRFAB|Q04747', 'HfsD|Q9A5L5', 'HfsF|Q9A5M1', 'HfsE|Q9A5M2', 'HfsG|Q9A5M0', 'HfsH|Q9A5L9', 'sdrC|A0A6A8FED6', 'SRFAC|Q08787', 'yfiB|Q9I4L6', 'sipW|P54506', 'RbmC|A0A2S1ZSI6', 'HfsC|Q9A5L8', 'HfsA|Q9A5L6', 'Bap1|Q9KQW0', 'SRFAD|Q08788']	5	srf_hfs_sdrc_bap1_rbmc	drag-reducing_adhesion	2	2777967	Coleofasciculus sp. LEGE 07081
GCA_000015245.1	17	['HfsD|Q9A5L5', 'Foo1|A1X158', 'HfsF|Q9A5M1', 'HfsH|Q9A5L9', 'HfsG|Q9A5M0', 'OmpU|P0C6Q6', 'sdrC|A0A6A8FED6', 'ompA|A0A3B6XXR4', 'yfiB|Q9I4L6', 'ompW|A0A0F4PBB9', 'sipW|P54506', 'RbmC|A0A2S1ZSI6', 'ChiA|P32823', 'HfaB|P27343', 'HfsA|Q9A5L6', 'Bap1|Q9KQW0', 'SRFAD|Q08788']	7	hfacces_foo_chia_ompu_sdrc_bap1_rbmc	adhesion_chitinase-production	2	326297	Shewanella amazonensis
GCA_002729215.1	11	['HfsD|Q9A5L5', 'HfsF|Q9A5M1', 'HfsE|Q9A5M2', 'HfsG|Q9A5M0', 'tpbB|A0A0H2Z7X0', 'ompA|A0A3B6XXR4', 'yfiB|Q9I4L6', 'GbpA|C3LW75', 'sipW|P54506', 'ChiA|P32823', 'SRFAD|Q08788']	2	chia_gbpa	chitinase-production_adhesion	2	1885344	Rubrivirga sp.
GCA_002725545.1	9	['HfsF|Q9A5M1', 'HfsG|Q9A5M0', 'sdrC|A0A6A8FED6', 'tpbB|A0A0H2Z7X0', 'yfiB|Q9I4L6', 'RbmC|A0A2S1ZSI6', 'ChiA|P32823', 'HfaB|P27343', 'Bap1|Q9KQW0']	5	hfacces_chia_sdrc_bap1_rbmc	adhesion_chitinase-production	2	2026760	Candidatus Marinimicrobia bacterium
GCA_002695705.1	10	['HfsD|Q9A5L5', 'HfsF|Q9A5M1', 'HfsH|Q9A5L9', 'HfsG|Q9A5M0', 'tpbB|A0A0H2Z7X0', 'sdrC|A0A6A8FED6', 'ompA|A0A3B6XXR4', 'sipW|P54506', 'ChiA|P32823', 'SRFAD|Q08788']	2	chia_sdrc	chitinase-production_adhesion	2	2026742	Gemmatimonadetes bacterium
GCA_002722955.1	15	['HfsD|Q9A5L5', 'Foo1|A1X158', 'HfsF|Q9A5M1', 'HfsH|Q9A5L9', 'HfsG|Q9A5M0', 'sdrC|A0A6A8FED6', 'ompA|A0A3B6XXR4', 'yfiB|Q9I4L6', 'sipW|P54506', 'RbmC|A0A2S1ZSI6', 'ChiA|P32823', 'HfsC|Q9A5L8', 'HfaB|P27343', 'Bap1|Q9KQW0', 'SRFAD|Q08788']	6	hfacces_foo_chia_sdrc_bap1_rbmc	adhesion_chitinase-production	2	2026779	Planctomycetaceae bacterium
GCA_002709205.1	13	['HfsD|Q9A5L5', 'OmpU|P0C6Q6', 'HfsF|Q9A5M1', 'HfsE|Q9A5M2', 'HfsH|Q9A5L9', 'HfsG|Q9A5M0', 'tpbB|A0A0H2Z7X0', 'yfiB|Q9I4L6', 'GbpA|C3LW75', 'sipW|P54506', 'ChiA|P32823', 'HfsC|Q9A5L8', 'HfsA|Q9A5L6']	4	hfs_chia_ompu_gbpa	adhesion_chitinase-production	2	2024856	Roseibacillus sp.
GCA_000764025.1	15	['HfsD|Q9A5L5', 'Foo1|A1X158', 'HfsF|Q9A5M1', 'HfsE|Q9A5M2', 'HfsH|Q9A5L9', 'HfsG|Q9A5M0', 'sdrC|A0A6A8FED6', 'yfiB|Q9I4L6', 'ompW|A0A0F4PBB9', 'sipW|P54506', 'ChiA|P32823', 'HfsC|Q9A5L8', 'yfiR|Q9I4L4', 'HfsA|Q9A5L6', 'SRFAD|Q08788']	4	hfs_foo_chia_sdrc	adhesion_chitinase-production	2	1265313	Pseudohaliea rubra
GCA_002689185.1	15	['HfsD|Q9A5L5', 'HfsF|Q9A5M1', 'HfsE|Q9A5M2', 'HfsH|Q9A5L9', 'HfsG|Q9A5M0', 'tpbB|A0A0H2Z7X0', 'sdrC|A0A6A8FED6', 'SRFAC|Q08787', 'ompA|A0A3B6XXR4', 'yfiB|Q9I4L6', 'RbmC|A0A2S1ZSI6', 'ChiA|P32823', 'HfsC|Q9A5L8', 'HfsA|Q9A5L6', 'Bap1|Q9KQW0']	5	hfs_chia_sdrc_bap1_rbmc	adhesion_chitinase-production	2	2024824	Balneola sp.
GCA_000156295.1	14	['HfsD|Q9A5L5', 'HfsF|Q9A5M1', 'HfsE|Q9A5M2', 'HfsH|Q9A5L9', 'HfsG|Q9A5M0', 'sdrC|A0A6A8FED6', 'yfiB|Q9I4L6', 'sipW|P54506', 'ChiA|P32823', 'HfsC|Q9A5L8', 'yfiR|Q9I4L4', 'HfaB|P27343', 'HfsA|Q9A5L6', 'SRFAD|Q08788']	4	hfs_hfacces_chia_sdrc	adhesion_chitinase-production	2	247634	marine gamma proteobacterium HTCC2148
GCA_002720375.1	11	['HfsD|Q9A5L5', 'HfsG|Q9A5M0', 'HfsE|Q9A5M2', 'HfsH|Q9A5L9', 'tpbB|A0A0H2Z7X0', 'yfiB|Q9I4L6', 'ChiA|P32823', 'HfsC|Q9A5L8', 'yfiR|Q9I4L4', 'HfaB|P27343', 'SRFAD|Q08788']	3	hfacces_chia_yfi	adhesion_chitinase-production	2	2026728	Crocinitomicaceae bacterium
GCA_000348925.1	17	['HfsD|Q9A5L5', 'OmpU|P0C6Q6', 'HfsF|Q9A5M1', 'HfsE|Q9A5M2', 'HfsH|Q9A5L9', 'HfsG|Q9A5M0', 'tpbB|A0A0H2Z7X0', 'sdrC|A0A6A8FED6', 'yfiB|Q9I4L6', 'sipW|P54506', 'RbmC|A0A2S1ZSI6', 'ChiA|P32823', 'HfsC|Q9A5L8', 'yfiR|Q9I4L4', 'HfsA|Q9A5L6', 'Bap1|Q9KQW0', 'SRFAD|Q08788']	7	hfs_chia_yfi_ompu_sdrc_bap1_rbmc	adhesion_chitinase-production	2	1279009	Cesiribacter andamanensis
GCA_004104375.1	17	['HfsD|Q9A5L5', 'HfsF|Q9A5M1', 'HfsE|Q9A5M2', 'HfsH|Q9A5L9', 'HfsG|Q9A5M0', 'tpbB|A0A0H2Z7X0', 'sdrC|A0A6A8FED6', 'ompA|A0A3B6XXR4', 'yfiB|Q9I4L6', 'sipW|P54506', 'RbmC|A0A2S1ZSI6', 'ChiA|P32823', 'HfsC|Q9A5L8', 'HfaB|P27343', 'HfsA|Q9A5L6', 'Bap1|Q9KQW0', 'SRFAD|Q08788']	6	hfs_hfacces_chia_sdrc_bap1_rbmc	adhesion_chitinase-production	2	283736	Leeuwenhoekiella aequorea
GCA_002283365.1	14	['HfsD|Q9A5L5', 'HfsF|Q9A5M1', 'HfsE|Q9A5M2', 'HfsH|Q9A5L9', 'HfsG|Q9A5M0', 'sdrC|A0A6A8FED6', 'ompA|A0A3B6XXR4', 'yfiB|Q9I4L6', 'sipW|P54506', 'ChiA|P32823', 'HfsC|Q9A5L8', 'HfaB|P27343', 'HfsA|Q9A5L6', 'SRFAD|Q08788']	4	hfs_hfacces_chia_sdrc	adhesion_chitinase-production	2	1196024	Rubrivirga marina
GCA_001304135.1	12	['HfsD|Q9A5L5', 'HfsF|Q9A5M1', 'HfsH|Q9A5L9', 'HfsG|Q9A5M0', 'sdrC|A0A6A8FED6', 'tasA|P54507', 'yfiB|Q9I4L6', 'sipW|P54506', 'ChiA|P32823', 'HfsC|Q9A5L8', 'HfaB|P27343', 'HfsA|Q9A5L6']	4	hfacces_chia_tapA_sdrc	adhesion_chitinase-production	2	1703777	Omnitrophica WOR_2 bacterium SM23_72
GCA_002872555.1	17	['HfsD|Q9A5L5', 'OmpU|P0C6Q6', 'HfsF|Q9A5M1', 'HfsH|Q9A5L9', 'HfsG|Q9A5M0', 'tpbB|A0A0H2Z7X0', 'ompA|A0A3B6XXR4', 'yfiB|Q9I4L6', 'ompW|A0A0F4PBB9', 'GbpA|C3LW75', 'sipW|P54506', 'ChiA|P32823', 'HfsC|Q9A5L8', 'yfiR|Q9I4L4', 'HfaB|P27343', 'HfsA|Q9A5L6', 'SRFAD|Q08788']	5	hfacces_chia_yfi_ompu_gbpa	adhesion_chitinase-production	2	1884479	Vibrio sp. 10N.286.55.E10
GCA_002687525.1	12	['HfsD|Q9A5L5', 'HfsF|Q9A5M1', 'HfsE|Q9A5M2', 'HfsG|Q9A5M0', 'tpbB|A0A0H2Z7X0', 'sdrC|A0A6A8FED6', 'ompA|A0A3B6XXR4', 'yfiB|Q9I4L6', 'pilF|A0A290TXQ9', 'sipW|P54506', 'ChiA|P32823', 'SRFAD|Q08788']	2	chia_sdrc	chitinase-production_adhesion	2	2026762	Micrococcales bacterium
GCA_002694145.1	11	['HfsD|Q9A5L5', 'OmpU|P0C6Q6', 'HfsF|Q9A5M1', 'HfsG|Q9A5M0', 'ompA|A0A3B6XXR4', 'yfiB|Q9I4L6', 'sipW|P54506', 'RbmC|A0A2S1ZSI6', 'ChiA|P32823', 'Bap1|Q9KQW0', 'SRFAD|Q08788']	4	chia_ompu_bap1_rbmc	chitinase-production_adhesion	2	2026782	Porticoccaceae bacterium
GCA_002720515.1	16	['SRFAA|P27206', 'SRFAB|Q04747', 'HfsD|Q9A5L5', 'Foo1|A1X158', 'HfsF|Q9A5M1', 'HfsG|Q9A5M0', 'HfsH|Q9A5L9', 'tpbB|A0A0H2Z7X0', 'sdrC|A0A6A8FED6', 'SRFAC|Q08787', 'yfiB|Q9I4L6', 'sipW|P54506', 'RbmC|A0A2S1ZSI6', 'ChiA|P32823', 'HfsC|Q9A5L8', 'Bap1|Q9KQW0']	5	foo_chia_sdrc_bap1_rbmc	adhesion_chitinase-production	2	2026763	Myxococcales bacterium
GCA_002702725.1	16	['HfsD|Q9A5L5', 'OmpU|P0C6Q6', 'HfsF|Q9A5M1', 'HfsE|Q9A5M2', 'HfsH|Q9A5L9', 'HfsG|Q9A5M0', 'tpbB|A0A0H2Z7X0', 'ompA|A0A3B6XXR4', 'yfiB|Q9I4L6', 'ompW|A0A0F4PBB9', 'sipW|P54506', 'ChiA|P32823', 'HfsC|Q9A5L8', 'HfaB|P27343', 'HfsA|Q9A5L6', 'SRFAD|Q08788']	4	hfs_hfacces_chia_ompu	adhesion_chitinase-production	2	2026782	Porticoccaceae bacterium
GCA_900114675.1	13	['HfsD|Q9A5L5', 'OmpU|P0C6Q6', 'HfsF|Q9A5M1', 'HfsE|Q9A5M2', 'HfsH|Q9A5L9', 'HfsG|Q9A5M0', 'sdrC|A0A6A8FED6', 'yfiB|Q9I4L6', 'sipW|P54506', 'ChiA|P32823', 'HfsC|Q9A5L8', 'HfsA|Q9A5L6', 'SRFAD|Q08788']	4	hfs_chia_ompu_sdrc	adhesion_chitinase-production	2	1123755	Yoonia litorea
GCA_001303135.1	11	['SRFAA|P27206', 'SRFAB|Q04747', 'Foo1|A1X158', 'HfsF|Q9A5M1', 'HfsG|Q9A5M0', 'SRFAC|Q08787', 'sipW|P54506', 'ChiA|P32823', 'HfsC|Q9A5L8', 'HfaB|P27343', 'HfsA|Q9A5L6']	3	hfacces_foo_chia	adhesion_chitinase-production	2	1703764	Parcubacteria bacterium DG_72
GCA_002723205.1	18	['HfsD|Q9A5L5', 'Foo1|A1X158', 'HfsF|Q9A5M1', 'HfsE|Q9A5M2', 'HfsH|Q9A5L9', 'HfsG|Q9A5M0', 'OmpU|P0C6Q6', 'tpbB|A0A0H2Z7X0', 'sdrC|A0A6A8FED6', 'ompA|A0A3B6XXR4', 'yfiB|Q9I4L6', 'pilF|A0A290TXQ9', 'sipW|P54506', 'ChiA|P32823', 'HfsC|Q9A5L8', 'yfiR|Q9I4L4', 'HfsA|Q9A5L6', 'SRFAD|Q08788']	6	hfs_foo_chia_yfi_ompu_sdrc	adhesion_chitinase-production	2	1916082	Alteromonadaceae bacterium
GCA_002721455.1	16	['HfsD|Q9A5L5', 'Foo1|A1X158', 'HfsG|Q9A5M0', 'HfsE|Q9A5M2', 'HfsH|Q9A5L9', 'OmpU|P0C6Q6', 'sdrC|A0A6A8FED6', 'ompA|A0A3B6XXR4', 'yfiB|Q9I4L6', 'pilF|A0A290TXQ9', 'sipW|P54506', 'ChiA|P32823', 'HfsC|Q9A5L8', 'HfaB|P27343', 'HfsA|Q9A5L6', 'SRFAD|Q08788']	5	hfacces_foo_chia_ompu_sdrc	adhesion_chitinase-production	2	1916082	Alteromonadaceae bacterium
GCA_002690985.1	17	['HfsD|Q9A5L5', 'Foo1|A1X158', 'HfsF|Q9A5M1', 'HfsE|Q9A5M2', 'HfsH|Q9A5L9', 'HfsG|Q9A5M0', 'OmpU|P0C6Q6', 'tpbB|A0A0H2Z7X0', 'ompA|A0A3B6XXR4', 'yfiB|Q9I4L6', 'ompW|A0A0F4PBB9', 'pilF|A0A290TXQ9', 'sipW|P54506', 'ChiA|P32823', 'HfsC|Q9A5L8', 'HfsA|Q9A5L6', 'SRFAD|Q08788']	5	hfs_foo_chia_omp_ompu	adhesion_chitinase-production	2	232	Alteromonas sp.
GCA_002699745.1	15	['HfsD|Q9A5L5', 'HfsF|Q9A5M1', 'HfsE|Q9A5M2', 'HfsH|Q9A5L9', 'HfsG|Q9A5M0', 'sdrC|A0A6A8FED6', 'ompA|A0A3B6XXR4', 'yfiB|Q9I4L6', 'sipW|P54506', 'ChiA|P32823', 'HfsC|Q9A5L8', 'yfiR|Q9I4L4', 'HfaB|P27343', 'HfsA|Q9A5L6', 'SRFAD|Q08788']	4	hfs_hfacces_chia_sdrc	adhesion_chitinase-production	2	2026728	Crocinitomicaceae bacterium
GCA_012641515.1	11	['HfsD|Q9A5L5', 'HfsF|Q9A5M1', 'HfsG|Q9A5M0', 'ompA|A0A3B6XXR4', 'tpbB|A0A0H2Z7X0', 'yfiB|Q9I4L6', 'sipW|P54506', 'RbmC|A0A2S1ZSI6', 'ChiA|P32823', 'Bap1|Q9KQW0', 'SRFAD|Q08788']	3	chia_bap1_rbmc	chitinase-production_adhesion	2	1463632	Nesterenkonia sedimenti
GCA_001303955.1	16	['HfsD|Q9A5L5', 'Foo1|A1X158', 'HfsF|Q9A5M1', 'HfsE|Q9A5M2', 'HfsH|Q9A5L9', 'HfsG|Q9A5M0', 'sdrC|A0A6A8FED6', 'yfiB|Q9I4L6', 'ompW|A0A0F4PBB9', 'sipW|P54506', 'ChiA|P32823', 'HfsC|Q9A5L8', 'yfiR|Q9I4L4', 'HfaB|P27343', 'HfsA|Q9A5L6', 'SRFAD|Q08788']	5	hfs_hfacces_foo_chia_sdrc	adhesion_chitinase-production	2	1703352	Bacteroides sp. SM23_62
GCA_002698705.1	10	['OmpU|P0C6Q6', 'HfsF|Q9A5M1', 'HfsE|Q9A5M2', 'HfsG|Q9A5M0', 'SRFAC|Q08787', 'yfiB|Q9I4L6', 'sipW|P54506', 'ChiA|P32823', 'HfsC|Q9A5L8', 'HfsA|Q9A5L6']	2	chia_ompu	chitinase-production_adhesion	2	2018467	Formosa sp.
GCA_014164085.1	20	['ompA|A0A3B6XXR4', 'HfaB|P27343', 'OmpU|P0C6Q6', 'tpbB|A0A0H2Z7X0', 'ompW|A0A0F4PBB9', 'RbmC|A0A2S1ZSI6', 'Bap1|Q9KQW0', 'HfsD|Q9A5L5', 'HfsF|Q9A5M1', 'HfsE|Q9A5M2', 'HfsH|Q9A5L9', 'HfsG|Q9A5M0', 'yfiB|Q9I4L6', 'sipW|P54506', 'ChiA|P32823', 'HfsC|Q9A5L8', 'HfsA|Q9A5L6', 'sdrC|A0A6A8FED6', 'GbpA|C3LW75', 'SRFAD|Q08788']	8	hfs_hfacces_chia_ompu_sdrc_bap1_rbmc_gbpa	adhesion_chitinase-production	2	2760954	Pseudoalteromonas sp. SG45-5
GCA_002707535.1	14	['SRFAA|P27206', 'SRFAB|Q04747', 'HfsD|Q9A5L5', 'Foo1|A1X158', 'HfsF|Q9A5M1', 'HfsE|Q9A5M2', 'HfsG|Q9A5M0', 'tpbB|A0A0H2Z7X0', 'sdrC|A0A6A8FED6', 'ompA|A0A3B6XXR4', 'SRFAC|Q08787', 'ChiA|P32823', 'HfsA|Q9A5L6', 'Bap1|Q9KQW0']	4	foo_chia_sdrc_bap1	adhesion_chitinase-production	2	2026760	Candidatus Marinimicrobia bacterium
GCA_900176475.1	14	['SRFAA|P27206', 'SRFAB|Q04747', 'HfsD|Q9A5L5', 'OmpU|P0C6Q6', 'HfsF|Q9A5M1', 'HfsG|Q9A5M0', 'HfsH|Q9A5L9', 'yfiB|Q9I4L6', 'ompW|A0A0F4PBB9', 'sipW|P54506', 'ChiA|P32823', 'HfsC|Q9A5L8', 'HfsA|Q9A5L6', 'SRFAD|Q08788']	2	chia_ompu	chitinase-production_adhesion	2	441103	Tropicibacter naphthalenivorans
GCA_002696075.1	14	['HfsD|Q9A5L5', 'HfsF|Q9A5M1', 'HfsE|Q9A5M2', 'HfsH|Q9A5L9', 'HfsG|Q9A5M0', 'tpbB|A0A0H2Z7X0', 'sdrC|A0A6A8FED6', 'yfiB|Q9I4L6', 'ompW|A0A0F4PBB9', 'sipW|P54506', 'ChiA|P32823', 'HfsC|Q9A5L8', 'HfsA|Q9A5L6', 'SRFAD|Q08788']	3	hfs_chia_sdrc	adhesion_chitinase-production	2	2024824	Balneola sp.
GCA_000014705.1	20	['Foo1|A1X158', 'ompA|A0A3B6XXR4', 'HfaB|P27343', 'OmpU|P0C6Q6', 'tpbB|A0A0H2Z7X0', 'ompW|A0A0F4PBB9', 'RbmC|A0A2S1ZSI6', 'Bap1|Q9KQW0', 'HfsD|Q9A5L5', 'HfsF|Q9A5M1', 'HfsE|Q9A5M2', 'HfsH|Q9A5L9', 'HfsG|Q9A5M0', 'yfiB|Q9I4L6', 'sipW|P54506', 'ChiA|P32823', 'HfsC|Q9A5L8', 'yfiR|Q9I4L4', 'HfsA|Q9A5L6', 'SRFAD|Q08788']	8	hfs_hfacces_foo_chia_yfi_ompu_bap1_rbmc	adhesion_chitinase-production	2	318167	Shewanella frigidimarina
GCA_001303365.1	11	['HfsD|Q9A5L5', 'HfsF|Q9A5M1', 'HfsE|Q9A5M2', 'HfsH|Q9A5L9', 'HfsG|Q9A5M0', 'tpbB|A0A0H2Z7X0', 'sdrC|A0A6A8FED6', 'yfiB|Q9I4L6', 'sipW|P54506', 'ChiA|P32823', 'SRFAD|Q08788']	2	chia_sdrc	chitinase-production_adhesion	2	1703408	Myxococcales bacterium SG8_38_1
GCA_900129995.1	15	['SRFAA|P27206', 'SRFAB|Q04747', 'HfsD|Q9A5L5', 'HfsF|Q9A5M1', 'HfsE|Q9A5M2', 'HfsG|Q9A5M0', 'HfsH|Q9A5L9', 'tasA|P54507', 'sdrC|A0A6A8FED6', 'ompA|A0A3B6XXR4', 'yfiB|Q9I4L6', 'sipW|P54506', 'ChiA|P32823', 'HfsC|Q9A5L8', 'SRFAD|Q08788']	3	chia_tapA_sdrc	chitinase-production_adhesion	2	1121264	Caloranaerobacter azorensis
GCA_002729725.1	15	['HfsD|Q9A5L5', 'OmpU|P0C6Q6', 'HfsF|Q9A5M1', 'HfsE|Q9A5M2', 'HfsH|Q9A5L9', 'HfsG|Q9A5M0', 'tpbB|A0A0H2Z7X0', 'sdrC|A0A6A8FED6', 'yfiB|Q9I4L6', 'pilF|A0A290TXQ9', 'sipW|P54506', 'ChiA|P32823', 'HfsC|Q9A5L8', 'HfsA|Q9A5L6', 'SRFAD|Q08788']	4	hfs_chia_ompu_sdrc	adhesion_chitinase-production	2	2026784	Puniceicoccaceae bacterium
GCA_900107635.1	16	['HfsD|Q9A5L5', 'Foo1|A1X158', 'HfsF|Q9A5M1', 'HfsE|Q9A5M2', 'HfsH|Q9A5L9', 'HfsG|Q9A5M0', 'tpbB|A0A0H2Z7X0', 'sdrC|A0A6A8FED6', 'yfiB|Q9I4L6', 'sipW|P54506', 'ChiA|P32823', 'HfsC|Q9A5L8', 'yfiR|Q9I4L4', 'HfaB|P27343', 'HfsA|Q9A5L6', 'SRFAD|Q08788']	6	hfs_hfacces_foo_chia_yfi_sdrc	adhesion_chitinase-production	2	150146	Flavobacterium gillisiae
GCA_007050985.1	16	['HfsD|Q9A5L5', 'HfsF|Q9A5M1', 'HfsE|Q9A5M2', 'HfsH|Q9A5L9', 'HfsG|Q9A5M0', 'sdrC|A0A6A8FED6', 'ompA|A0A3B6XXR4', 'yfiB|Q9I4L6', 'sipW|P54506', 'RbmC|A0A2S1ZSI6', 'ChiA|P32823', 'HfsC|Q9A5L8', 'yfiR|Q9I4L4', 'HfsA|Q9A5L6', 'Bap1|Q9KQW0', 'SRFAD|Q08788']	5	hfs_chia_sdrc_bap1_rbmc	adhesion_chitinase-production	2	2583991	Gramella sabulilitoris
GCA_002690915.1	14	['HfsD|Q9A5L5', 'Foo1|A1X158', 'HfsG|Q9A5M0', 'HfsE|Q9A5M2', 'HfsH|Q9A5L9', 'tpbB|A0A0H2Z7X0', 'yfiB|Q9I4L6', 'sipW|P54506', 'ChiA|P32823', 'HfsC|Q9A5L8', 'yfiR|Q9I4L4', 'HfaB|P27343', 'HfsA|Q9A5L6', 'SRFAD|Q08788']	4	hfacces_foo_chia_yfi	adhesion_chitinase-production	2	2026728	Crocinitomicaceae bacterium
GCA_000196315.1	16	['HfsD|Q9A5L5', 'HfsF|Q9A5M1', 'HfsE|Q9A5M2', 'HfsH|Q9A5L9', 'HfsG|Q9A5M0', 'tpbB|A0A0H2Z7X0', 'sdrC|A0A6A8FED6', 'ompA|A0A3B6XXR4', 'yfiB|Q9I4L6', 'sipW|P54506', 'RbmC|A0A2S1ZSI6', 'ChiA|P32823', 'HfsC|Q9A5L8', 'HfsA|Q9A5L6', 'Bap1|Q9KQW0', 'SRFAD|Q08788']	5	hfs_chia_sdrc_bap1_rbmc	adhesion_chitinase-production	2	216432	Croceibacter atlanticus
GCA_002683825.1	19	['SRFAB|Q04747', 'Foo1|A1X158', 'HfaB|P27343', 'SRFAA|P27206', 'OmpU|P0C6Q6', 'RbmC|A0A2S1ZSI6', 'Bap1|Q9KQW0', 'HfsD|Q9A5L5', 'HfsF|Q9A5M1', 'HfsE|Q9A5M2', 'HfsG|Q9A5M0', 'HfsH|Q9A5L9', 'SRFAC|Q08787', 'yfiB|Q9I4L6', 'sipW|P54506', 'HfsC|Q9A5L8', 'HfsA|Q9A5L6', 'sdrC|A0A6A8FED6', 'SRFAD|Q08788']	8	srf_hfs_hfacces_foo_ompu_sdrc_bap1_rbmc	drag-reducing_adhesion	2	2026780	Planctomycetota bacterium
GCA_007197775.1	15	['HfsD|Q9A5L5', 'OmpU|P0C6Q6', 'HfsF|Q9A5M1', 'HfsE|Q9A5M2', 'HfsH|Q9A5L9', 'HfsG|Q9A5M0', 'yfiB|Q9I4L6', 'ompW|A0A0F4PBB9', 'pilF|A0A290TXQ9', 'sipW|P54506', 'ChiA|P32823', 'HfsC|Q9A5L8', 'HfaB|P27343', 'HfsA|Q9A5L6', 'SRFAD|Q08788']	4	hfs_hfacces_chia_ompu	adhesion_chitinase-production	2	2594005	Thalassotalea sp. PS06
GCA_002708315.1	18	['HfsD|Q9A5L5', 'OmpU|P0C6Q6', 'HfsF|Q9A5M1', 'HfsE|Q9A5M2', 'HfsH|Q9A5L9', 'HfsG|Q9A5M0', 'tpbB|A0A0H2Z7X0', 'sdrC|A0A6A8FED6', 'ompA|A0A3B6XXR4', 'yfiB|Q9I4L6', 'ompW|A0A0F4PBB9', 'sipW|P54506', 'RbmC|A0A2S1ZSI6', 'ChiA|P32823', 'HfsC|Q9A5L8', 'HfsA|Q9A5L6', 'Bap1|Q9KQW0', 'SRFAD|Q08788']	6	hfs_chia_ompu_sdrc_bap1_rbmc	adhesion_chitinase-production	2	2026756	Lentimicrobiaceae bacterium
GCA_002875635.1	17	['HfsD|Q9A5L5', 'OmpU|P0C6Q6', 'HfsF|Q9A5M1', 'HfsE|Q9A5M2', 'HfsH|Q9A5L9', 'HfsG|Q9A5M0', 'sdrC|A0A6A8FED6', 'ompA|A0A3B6XXR4', 'yfiB|Q9I4L6', 'GbpA|C3LW75', 'sipW|P54506', 'ChiA|P32823', 'HfsC|Q9A5L8', 'yfiR|Q9I4L4', 'HfaB|P27343', 'HfsA|Q9A5L6', 'SRFAD|Q08788']	6	hfs_hfacces_chia_ompu_sdrc_gbpa	adhesion_chitinase-production	2	188144	Enterovibrio norvegicus
GCA_001304495.1	11	['HfsD|Q9A5L5', 'OmpU|P0C6Q6', 'HfsF|Q9A5M1', 'HfsE|Q9A5M2', 'HfsH|Q9A5L9', 'HfsG|Q9A5M0', 'yfiB|Q9I4L6', 'ChiA|P32823', 'HfsC|Q9A5L8', 'HfsA|Q9A5L6', 'SRFAD|Q08788']	3	hfs_chia_ompu	adhesion_chitinase-production	2	1703763	bacterium SM23_57
GCA_013364175.1	24	['SRFAB|Q04747', 'CHPC|Q9AD93', 'Foo1|A1X158', 'ompA|A0A3B6XXR4', 'CHPE|Q9X9Z2', 'SRFAA|P27206', 'CHPG|Q9KYH3', 'CHPA|Q8CJY7', 'HfsD|Q9A5L5', 'HfsF|Q9A5M1', 'HfsE|Q9A5M2', 'HfsG|Q9A5M0', 'HfsH|Q9A5L9', 'SRFAC|Q08787', 'yfiB|Q9I4L6', 'CHPF|Q9KYG7', 'CHPH|Q9AD92', 'sipW|P54506', 'HfsC|Q9A5L8', 'HfsA|Q9A5L6', 'CHPB|Q9X7U2', 'CHPD|Q9L1J9', 'GbpA|C3LW75', 'SRFAD|Q08788']	5	srf_hfs_chp_foo_gbpa	drag-reducing_adhesion	2	2742133	Streptomyces sp. NA02536
GCA_009659405.1	17	['HfsD|Q9A5L5', 'Foo1|A1X158', 'HfsF|Q9A5M1', 'HfsH|Q9A5L9', 'HfsG|Q9A5M0', 'OmpU|P0C6Q6', 'ompA|A0A3B6XXR4', 'yfiB|Q9I4L6', 'ompW|A0A0F4PBB9', 'sipW|P54506', 'RbmC|A0A2S1ZSI6', 'ChiA|P32823', 'HfsC|Q9A5L8', 'HfaB|P27343', 'HfsA|Q9A5L6', 'Bap1|Q9KQW0', 'SRFAD|Q08788']	6	hfacces_foo_chia_ompu_bap1_rbmc	adhesion_chitinase-production	2	2665225	Idiomarina sp. FeN1
GCA_002709385.1	11	['HfsD|Q9A5L5', 'HfsF|Q9A5M1', 'HfsG|Q9A5M0', 'GalL|C0HLX7', 'sdrC|A0A6A8FED6', 'yfiB|Q9I4L6', 'ompW|A0A0F4PBB9', 'sipW|P54506', 'HfsC|Q9A5L8', 'HfsA|Q9A5L6', 'SRFAD|Q08788']	2	gal_sdrc	colonization-resistance_adhesion	2	2026802	Waddliaceae bacterium
GCA_900129155.1	18	['SRFAA|P27206', 'SRFAB|Q04747', 'HfsD|Q9A5L5', 'OmpU|P0C6Q6', 'HfsF|Q9A5M1', 'HfsE|Q9A5M2', 'HfsG|Q9A5M0', 'HfsH|Q9A5L9', 'ompA|A0A3B6XXR4', 'SRFAC|Q08787', 'yfiB|Q9I4L6', 'ompW|A0A0F4PBB9', 'sipW|P54506', 'RbmC|A0A2S1ZSI6', 'HfsC|Q9A5L8', 'HfsA|Q9A5L6', 'Bap1|Q9KQW0', 'SRFAD|Q08788']	5	srf_hfs_ompu_bap1_rbmc	drag-reducing_adhesion	2	1122206	Marinomonas polaris
GCA_002701525.1	12	['HfsD|Q9A5L5', 'HfsF|Q9A5M1', 'HfsH|Q9A5L9', 'HfsG|Q9A5M0', 'sdrC|A0A6A8FED6', 'ompA|A0A3B6XXR4', 'yfiB|Q9I4L6', 'RbmC|A0A2S1ZSI6', 'ChiA|P32823', 'HfsA|Q9A5L6', 'Bap1|Q9KQW0', 'pilF|A0A290TXQ9']	4	chia_sdrc_bap1_rbmc	chitinase-production_adhesion	2	2026760	Candidatus Marinimicrobia bacterium
GCA_003095655.1	17	['HfsD|Q9A5L5', 'Foo1|A1X158', 'HfsF|Q9A5M1', 'HfsE|Q9A5M2', 'HfsH|Q9A5L9', 'HfsG|Q9A5M0', 'tasA|P54507', 'sdrC|A0A6A8FED6', 'ompA|A0A3B6XXR4', 'yfiB|Q9I4L6', 'sipW|P54506', 'ChiA|P32823', 'HfsC|Q9A5L8', 'yfiR|Q9I4L4', 'HfaB|P27343', 'HfsA|Q9A5L6', 'SRFAD|Q08788']	6	hfs_hfacces_foo_chia_tapA_sdrc	adhesion_chitinase-production	2	2173169	Dokdonia sp. Dokd-P16
GCA_014164025.1	19	['Foo1|A1X158', 'ompA|A0A3B6XXR4', 'HfaB|P27343', 'OmpU|P0C6Q6', 'tpbB|A0A0H2Z7X0', 'ompW|A0A0F4PBB9', 'HfsD|Q9A5L5', 'HfsG|Q9A5M0', 'HfsE|Q9A5M2', 'HfsH|Q9A5L9', 'yfiB|Q9I4L6', 'sipW|P54506', 'ChiA|P32823', 'HfsC|Q9A5L8', 'yfiR|Q9I4L4', 'HfsA|Q9A5L6', 'sdrC|A0A6A8FED6', 'GbpA|C3LW75', 'SRFAD|Q08788']	7	hfacces_foo_chia_yfi_ompu_sdrc_gbpa	adhesion_chitinase-production	2	2760953	Pseudoalteromonas sp. SG45-6
GCA_002724575.1	13	['HfsD|Q9A5L5', 'Foo1|A1X158', 'HfsF|Q9A5M1', 'HfsE|Q9A5M2', 'HfsH|Q9A5L9', 'HfsG|Q9A5M0', 'tpbB|A0A0H2Z7X0', 'sdrC|A0A6A8FED6', 'ompA|A0A3B6XXR4', 'sipW|P54506', 'ChiA|P32823', 'HfsC|Q9A5L8', 'SRFAD|Q08788']	3	foo_chia_sdrc	adhesion_chitinase-production	2	2026742	Gemmatimonadetes bacterium
GCA_001303065.1	13	['HfsD|Q9A5L5', 'Foo1|A1X158', 'HfsF|Q9A5M1', 'HfsG|Q9A5M0', 'sdrC|A0A6A8FED6', 'tpbB|A0A0H2Z7X0', 'SRFAC|Q08787', 'yfiB|Q9I4L6', 'GbpA|C3LW75', 'sipW|P54506', 'ChiA|P32823', 'yfiR|Q9I4L4', 'SRFAD|Q08788']	5	foo_chia_yfi_sdrc_gbpa	adhesion_chitinase-production	2	1703403	Gammaproteobacteria bacterium SG8_15
GCA_014524565.1	16	['HfsD|Q9A5L5', 'HfsF|Q9A5M1', 'HfsE|Q9A5M2', 'HfsH|Q9A5L9', 'HfsG|Q9A5M0', 'tpbB|A0A0H2Z7X0', 'sdrC|A0A6A8FED6', 'ompA|A0A3B6XXR4', 'yfiB|Q9I4L6', 'sipW|P54506', 'RbmC|A0A2S1ZSI6', 'ChiA|P32823', 'HfsC|Q9A5L8', 'HfsA|Q9A5L6', 'Bap1|Q9KQW0', 'SRFAD|Q08788']	5	hfs_chia_sdrc_bap1_rbmc	adhesion_chitinase-production	2	2761580	Croceimicrobium hydrocarbonivorans
GCA_002722375.1	17	['SRFAA|P27206', 'SRFAB|Q04747', 'HfsD|Q9A5L5', 'OmpU|P0C6Q6', 'HfsF|Q9A5M1', 'bslB|P39632', 'HfsG|Q9A5M0', 'HfsH|Q9A5L9', 'sdrC|A0A6A8FED6', 'SRFAD|Q08788', 'yfiB|Q9I4L6', 'sipW|P54506', 'RbmC|A0A2S1ZSI6', 'HfsC|Q9A5L8', 'HfsA|Q9A5L6', 'Bap1|Q9KQW0', 'bslA|P71014']	5	bsl_ompu_sdrc_bap1_rbmc	drag-reducing_adhesion	2	1903071	Sulfitobacter sp.
GCA_002707125.1	12	['SRFAA|P27206', 'SRFAB|Q04747', 'HfsD|Q9A5L5', 'Foo1|A1X158', 'HfsG|Q9A5M0', 'HfsH|Q9A5L9', 'ompA|A0A3B6XXR4', 'tpbB|A0A0H2Z7X0', 'pilF|A0A290TXQ9', 'ChiA|P32823', 'HfsC|Q9A5L8', 'SRFAD|Q08788']	2	foo_chia	adhesion_chitinase-production	2	2026724	Chloroflexi bacterium
GCA_002717085.1	10	['HfsD|Q9A5L5', 'HfsG|Q9A5M0', 'HfsH|Q9A5L9', 'pilF|A0A290TXQ9', 'sipW|P54506', 'RbmC|A0A2S1ZSI6', 'ChiA|P32823', 'HfsC|Q9A5L8', 'Bap1|Q9KQW0', 'SRFAD|Q08788']	3	chia_bap1_rbmc	chitinase-production_adhesion	2	2026734	Dehalococcoidia bacterium
GCA_002684355.1	10	['Foo1|A1X158', 'OmpU|P0C6Q6', 'HfsF|Q9A5M1', 'HfsE|Q9A5M2', 'HfsG|Q9A5M0', 'yfiB|Q9I4L6', 'sipW|P54506', 'ChiA|P32823', 'HfsC|Q9A5L8', 'HfsA|Q9A5L6']	3	foo_chia_ompu	adhesion_chitinase-production	2	2018467	Formosa sp.
GCA_002696025.1	16	['SRFAA|P27206', 'SRFAB|Q04747', 'HfsD|Q9A5L5', 'HfsF|Q9A5M1', 'HfsG|Q9A5M0', 'HfsH|Q9A5L9', 'tpbB|A0A0H2Z7X0', 'sdrC|A0A6A8FED6', 'yfiB|Q9I4L6', 'sipW|P54506', 'RbmC|A0A2S1ZSI6', 'ChiA|P32823', 'HfsC|Q9A5L8', 'HfsA|Q9A5L6', 'Bap1|Q9KQW0', 'SRFAD|Q08788']	4	chia_sdrc_bap1_rbmc	chitinase-production_adhesion	2	2026728	Crocinitomicaceae bacterium
GCA_002872545.1	16	['HfsD|Q9A5L5', 'OmpU|P0C6Q6', 'HfsG|Q9A5M0', 'HfsH|Q9A5L9', 'ompA|A0A3B6XXR4', 'tpbB|A0A0H2Z7X0', 'yfiB|Q9I4L6', 'ompW|A0A0F4PBB9', 'GbpA|C3LW75', 'sipW|P54506', 'ChiA|P32823', 'HfsC|Q9A5L8', 'yfiR|Q9I4L4', 'HfaB|P27343', 'HfsA|Q9A5L6', 'SRFAD|Q08788']	5	hfacces_chia_yfi_ompu_gbpa	adhesion_chitinase-production	2	1884480	Vibrio sp. 10N.286.55.E12
GCA_001886415.1	20	['Foo1|A1X158', 'ompA|A0A3B6XXR4', 'HfaB|P27343', 'OmpU|P0C6Q6', 'tpbB|A0A0H2Z7X0', 'ompW|A0A0F4PBB9', 'pilF|A0A290TXQ9', 'HfsD|Q9A5L5', 'HfsF|Q9A5M1', 'HfsE|Q9A5M2', 'HfsH|Q9A5L9', 'HfsG|Q9A5M0', 'yfiB|Q9I4L6', 'sipW|P54506', 'ChiA|P32823', 'HfsC|Q9A5L8', 'HfsA|Q9A5L6', 'sdrC|A0A6A8FED6', 'GbpA|C3LW75', 'SRFAD|Q08788']	8	hfs_hfacces_foo_chia_omp_ompu_sdrc_gbpa	adhesion_chitinase-production	2	314275	Alteromonas mediterranea
GCA_002683715.1	7	['HfsG|Q9A5M0', 'sdrC|A0A6A8FED6', 'tpbB|A0A0H2Z7X0', 'sipW|P54506', 'ChiA|P32823', 'HfsC|Q9A5L8', 'SRFAD|Q08788']	2	chia_sdrc	chitinase-production_adhesion	2	51671	Microbacterium sp.
GCA_014077115.1	17	['HfsD|Q9A5L5', 'OmpU|P0C6Q6', 'HfsF|Q9A5M1', 'HfsH|Q9A5L9', 'HfsG|Q9A5M0', 'tpbB|A0A0H2Z7X0', 'sdrC|A0A6A8FED6', 'ompA|A0A3B6XXR4', 'yfiB|Q9I4L6', 'ompW|A0A0F4PBB9', 'pilF|A0A290TXQ9', 'sipW|P54506', 'ChiA|P32823', 'HfsC|Q9A5L8', 'HfaB|P27343', 'HfsA|Q9A5L6', 'SRFAD|Q08788']	5	hfacces_chia_omp_ompu_sdrc	adhesion_chitinase-production	2	2759825	Colwellia sp. MB02u-19
GCA_000981765.1	14	['HfsD|Q9A5L5', 'Foo1|A1X158', 'HfsF|Q9A5M1', 'HfsE|Q9A5M2', 'HfsG|Q9A5M0', 'sdrC|A0A6A8FED6', 'ompA|A0A3B6XXR4', 'yfiB|Q9I4L6', 'ompW|A0A0F4PBB9', 'sipW|P54506', 'ChiA|P32823', 'HfsC|Q9A5L8', 'HfsA|Q9A5L6', 'SRFAD|Q08788']	3	foo_chia_sdrc	adhesion_chitinase-production	2	914150	Kangiella geojedonensis
GCA_002707865.1	12	['HfsD|Q9A5L5', 'Foo1|A1X158', 'HfsG|Q9A5M0', 'HfsF|Q9A5M1', 'OmpU|P0C6Q6', 'sdrC|A0A6A8FED6', 'yfiB|Q9I4L6', 'Hydrophobin_1|P52754', 'ompW|A0A0F4PBB9', 'sipW|P54506', 'HfsA|Q9A5L6', 'Trihydrophobin|Q9UVI4']	4	hyd_foo_ompu_sdrc	drag-reducing_adhesion	2	2026759	Magnetococcales bacterium
GCA_002722795.1	14	['HfsF|Q9A5M1', 'HfsE|Q9A5M2', 'HfsH|Q9A5L9', 'HfsG|Q9A5M0', 'tpbB|A0A0H2Z7X0', 'yfiB|Q9I4L6', 'sipW|P54506', 'RbmC|A0A2S1ZSI6', 'ChiA|P32823', 'HfsC|Q9A5L8', 'HfaB|P27343', 'HfsA|Q9A5L6', 'Bap1|Q9KQW0', 'SRFAD|Q08788']	4	hfacces_chia_bap1_rbmc	adhesion_chitinase-production	2	2026728	Crocinitomicaceae bacterium
GCA_001303995.1	15	['SRFAA|P27206', 'SRFAB|Q04747', 'HfsF|Q9A5M1', 'HfsE|Q9A5M2', 'HfsG|Q9A5M0', 'HfsH|Q9A5L9', 'tpbB|A0A0H2Z7X0', 'sdrC|A0A6A8FED6', 'SRFAC|Q08787', 'yfiB|Q9I4L6', 'RbmC|A0A2S1ZSI6', 'ChiA|P32823', 'HfsC|Q9A5L8', 'yfiR|Q9I4L4', 'Bap1|Q9KQW0']	5	chia_yfi_sdrc_bap1_rbmc	chitinase-production_adhesion	2	1703425	candidate division Zixibacteria bacterium SM23_73
GCA_001691025.1	14	['HfsD|Q9A5L5', 'OmpU|P0C6Q6', 'HfsG|Q9A5M0', 'HfsE|Q9A5M2', 'ompA|A0A3B6XXR4', 'yfiB|Q9I4L6', 'GbpA|C3LW75', 'sipW|P54506', 'ChiA|P32823', 'HfsC|Q9A5L8', 'yfiR|Q9I4L4', 'HfaB|P27343', 'HfsA|Q9A5L6', 'SRFAD|Q08788']	4	hfacces_chia_ompu_gbpa	adhesion_chitinase-production	2	1840086	Aliivibrio sp. 1S165
GCA_002683475.1	16	['HfsD|Q9A5L5', 'OmpU|P0C6Q6', 'HfsG|Q9A5M0', 'HfsE|Q9A5M2', 'HfsH|Q9A5L9', 'tpbB|A0A0H2Z7X0', 'ompA|A0A3B6XXR4', 'yfiB|Q9I4L6', 'ompW|A0A0F4PBB9', 'sipW|P54506', 'RbmC|A0A2S1ZSI6', 'ChiA|P32823', 'HfsC|Q9A5L8', 'HfsA|Q9A5L6', 'Bap1|Q9KQW0', 'SRFAD|Q08788']	4	chia_ompu_bap1_rbmc	chitinase-production_adhesion	2	1932666	Haliea sp.
GCA_002707035.1	19	['CHPC|Q9AD93', 'Foo1|A1X158', 'CHPE|Q9X9Z2', 'tpbB|A0A0H2Z7X0', 'CHPG|Q9KYH3', 'CHPA|Q8CJY7', 'HfsD|Q9A5L5', 'HfsG|Q9A5M0', 'HfsE|Q9A5M2', 'HfsH|Q9A5L9', 'CHPF|Q9KYG7', 'CHPH|Q9AD92', 'sipW|P54506', 'HfsC|Q9A5L8', 'HfsA|Q9A5L6', 'CHPB|Q9X7U2', 'sdrC|A0A6A8FED6', 'CHPD|Q9L1J9', 'SRFAD|Q08788']	3	chp_foo_sdrc	drag-reducing_adhesion	2	51671	Microbacterium sp.
GCA_000350545.1	16	['SRFAA|P27206', 'SRFAB|Q04747', 'HfsD|Q9A5L5', 'OmpU|P0C6Q6', 'HfsF|Q9A5M1', 'HfsG|Q9A5M0', 'HfsH|Q9A5L9', 'SRFAC|Q08787', 'yfiB|Q9I4L6', 'sipW|P54506', 'RbmC|A0A2S1ZSI6', 'HfsC|Q9A5L8', 'HfaB|P27343', 'HfsA|Q9A5L6', 'Bap1|Q9KQW0', 'SRFAD|Q08788']	5	srf_hfacces_ompu_bap1_rbmc	drag-reducing_adhesion	2	1286635	Desulfotignum phosphitoxidans
GCA_002694225.1	18	['HfsD|Q9A5L5', 'Foo1|A1X158', 'HfsG|Q9A5M0', 'HfsE|Q9A5M2', 'HfsH|Q9A5L9', 'OmpU|P0C6Q6', 'tpbB|A0A0H2Z7X0', 'sdrC|A0A6A8FED6', 'ompA|A0A3B6XXR4', 'yfiB|Q9I4L6', 'ompW|A0A0F4PBB9', 'pilF|A0A290TXQ9', 'sipW|P54506', 'ChiA|P32823', 'HfsC|Q9A5L8', 'HfaB|P27343', 'HfsA|Q9A5L6', 'SRFAD|Q08788']	6	hfacces_foo_chia_omp_ompu_sdrc	adhesion_chitinase-production	2	232	Alteromonas sp.
GCA_002729275.1	14	['HfsD|Q9A5L5', 'OmpU|P0C6Q6', 'HfsF|Q9A5M1', 'HfsE|Q9A5M2', 'HfsH|Q9A5L9', 'HfsG|Q9A5M0', 'tpbB|A0A0H2Z7X0', 'sdrC|A0A6A8FED6', 'yfiB|Q9I4L6', 'sipW|P54506', 'ChiA|P32823', 'HfsC|Q9A5L8', 'HfsA|Q9A5L6', 'SRFAD|Q08788']	4	hfs_chia_ompu_sdrc	adhesion_chitinase-production	2	2024856	Roseibacillus sp.
GCA_002687595.1	7	['HfsD|Q9A5L5', 'yfiB|Q9I4L6', 'ompW|A0A0F4PBB9', 'sipW|P54506', 'ChiA|P32823', 'HfaB|P27343', 'SRFAD|Q08788']	2	hfacces_chia	adhesion_chitinase-production	2	1486246	Halomonas sp.
GCA_004421105.1	18	['SRFAA|P27206', 'SRFAB|Q04747', 'HfsD|Q9A5L5', 'OmpU|P0C6Q6', 'HfsF|Q9A5M1', 'HfsE|Q9A5M2', 'HfsG|Q9A5M0', 'HfsH|Q9A5L9', 'tpbB|A0A0H2Z7X0', 'SRFAC|Q08787', 'yfiB|Q9I4L6', 'sipW|P54506', 'RbmC|A0A2S1ZSI6', 'HfsC|Q9A5L8', 'HfaB|P27343', 'HfsA|Q9A5L6', 'Bap1|Q9KQW0', 'SRFAD|Q08788']	6	srf_hfs_hfacces_ompu_bap1_rbmc	drag-reducing_adhesion	2	1814290	Nitrosococcus wardiae
GCA_002717915.1	12	['HfsD|Q9A5L5', 'OmpU|P0C6Q6', 'HfsF|Q9A5M1', 'HfsE|Q9A5M2', 'HfsG|Q9A5M0', 'tpbB|A0A0H2Z7X0', 'sdrC|A0A6A8FED6', 'yfiB|Q9I4L6', 'ChiA|P32823', 'HfaB|P27343', 'HfsA|Q9A5L6', 'Bap1|Q9KQW0']	5	hfacces_chia_ompu_sdrc_bap1	adhesion_chitinase-production	2	2026760	Candidatus Marinimicrobia bacterium
GCA_002710865.1	13	['HfsD|Q9A5L5', 'Foo1|A1X158', 'HfsG|Q9A5M0', 'HfsE|Q9A5M2', 'HfsH|Q9A5L9', 'OmpU|P0C6Q6', 'sdrC|A0A6A8FED6', 'yfiB|Q9I4L6', 'sipW|P54506', 'ChiA|P32823', 'HfsC|Q9A5L8', 'HfsA|Q9A5L6', 'SRFAD|Q08788']	4	foo_chia_ompu_sdrc	adhesion_chitinase-production	2	1871068	Phyllobacteriaceae bacterium
GCA_002726515.1	12	['HfsD|Q9A5L5', 'HfsF|Q9A5M1', 'HfsH|Q9A5L9', 'HfsG|Q9A5M0', 'sdrC|A0A6A8FED6', 'ompA|A0A3B6XXR4', 'yfiB|Q9I4L6', 'sipW|P54506', 'ChiA|P32823', 'HfsC|Q9A5L8', 'HfsA|Q9A5L6', 'SRFAD|Q08788']	2	chia_sdrc	chitinase-production_adhesion	2	2026779	Planctomycetaceae bacterium
GCA_000170815.1	17	['HfsD|Q9A5L5', 'Foo1|A1X158', 'HfsF|Q9A5M1', 'HfsE|Q9A5M2', 'HfsH|Q9A5L9', 'HfsG|Q9A5M0', 'tpbB|A0A0H2Z7X0', 'sdrC|A0A6A8FED6', 'ompA|A0A3B6XXR4', 'yfiB|Q9I4L6', 'sipW|P54506', 'RbmC|A0A2S1ZSI6', 'ChiA|P32823', 'HfsC|Q9A5L8', 'HfaB|P27343', 'Bap1|Q9KQW0', 'SRFAD|Q08788']	6	hfacces_foo_chia_sdrc_bap1_rbmc	adhesion_chitinase-production	2	50743	unidentified eubacterium SCB49
GCA_014164315.1	21	['Foo1|A1X158', 'ompA|A0A3B6XXR4', 'HfaB|P27343', 'OmpU|P0C6Q6', 'ompW|A0A0F4PBB9', 'RbmC|A0A2S1ZSI6', 'Bap1|Q9KQW0', 'pilF|A0A290TXQ9', 'HfsD|Q9A5L5', 'HfsF|Q9A5M1', 'HfsH|Q9A5L9', 'HfsG|Q9A5M0', 'yfiB|Q9I4L6', 'sipW|P54506', 'ChiA|P32823', 'HfsC|Q9A5L8', 'yfiR|Q9I4L4', 'HfsA|Q9A5L6', 'sdrC|A0A6A8FED6', 'GbpA|C3LW75', 'SRFAD|Q08788']	9	hfacces_foo_chia_omp_ompu_sdrc_bap1_rbmc_gbpa	adhesion_chitinase-production	2	2760964	Pseudoalteromonas sp. SG44-1
GCA_016653315.1	15	['SRFAA|P27206', 'SRFAB|Q04747', 'HfsD|Q9A5L5', 'OmpU|P0C6Q6', 'HfsF|Q9A5M1', 'HfsE|Q9A5M2', 'HfsG|Q9A5M0', 'HfsH|Q9A5L9', 'yfiB|Q9I4L6', 'sipW|P54506', 'ChiA|P32823', 'HfsC|Q9A5L8', 'yfiR|Q9I4L4', 'HfsA|Q9A5L6', 'SRFAD|Q08788']	3	hfs_chia_ompu	adhesion_chitinase-production	2	391920	Halochromatium roseum
GCA_013416325.1	18	['SRFAA|P27206', 'SRFAB|Q04747', 'HfsD|Q9A5L5', 'OmpU|P0C6Q6', 'HfsF|Q9A5M1', 'HfsE|Q9A5M2', 'HfsG|Q9A5M0', 'HfsH|Q9A5L9', 'SRFAC|Q08787', 'yfiB|Q9I4L6', 'ompW|A0A0F4PBB9', 'sipW|P54506', 'RbmC|A0A2S1ZSI6', 'HfsC|Q9A5L8', 'HfaB|P27343', 'HfsA|Q9A5L6', 'Bap1|Q9KQW0', 'SRFAD|Q08788']	6	srf_hfs_hfacces_ompu_bap1_rbmc	drag-reducing_adhesion	2	2729618	Halomonas sedimenti
GCA_002709695.1	16	['HfsD|Q9A5L5', 'OmpU|P0C6Q6', 'HfsF|Q9A5M1', 'bslB|P39632', 'HfsH|Q9A5L9', 'HfsG|Q9A5M0', 'sdrC|A0A6A8FED6', 'yfiB|Q9I4L6', 'sipW|P54506', 'RbmC|A0A2S1ZSI6', 'HfsC|Q9A5L8', 'yfiR|Q9I4L4', 'HfaB|P27343', 'HfsA|Q9A5L6', 'Bap1|Q9KQW0', 'bslA|P71014']	6	bsl_hfacces_ompu_sdrc_bap1_rbmc	drag-reducing_adhesion	2	2026781	Candidatus Poribacteria bacterium
GCA_014164135.1	19	['Foo1|A1X158', 'ompA|A0A3B6XXR4', 'HfaB|P27343', 'OmpU|P0C6Q6', 'tpbB|A0A0H2Z7X0', 'ompW|A0A0F4PBB9', 'HfsD|Q9A5L5', 'HfsF|Q9A5M1', 'HfsE|Q9A5M2', 'HfsH|Q9A5L9', 'HfsG|Q9A5M0', 'yfiB|Q9I4L6', 'sipW|P54506', 'ChiA|P32823', 'HfsC|Q9A5L8', 'yfiR|Q9I4L4', 'HfsA|Q9A5L6', 'GbpA|C3LW75', 'SRFAD|Q08788']	7	hfs_hfacces_foo_chia_yfi_ompu_gbpa	adhesion_chitinase-production	2	2760957	Pseudoalteromonas sp. SG45-1
GCA_012037645.1	14	['HfsD|Q9A5L5', 'HfsF|Q9A5M1', 'HfsE|Q9A5M2', 'HfsH|Q9A5L9', 'HfsG|Q9A5M0', 'tpbB|A0A0H2Z7X0', 'sdrC|A0A6A8FED6', 'yfiB|Q9I4L6', 'sipW|P54506', 'RbmC|A0A2S1ZSI6', 'ChiA|P32823', 'HfsC|Q9A5L8', 'Bap1|Q9KQW0', 'SRFAD|Q08788']	4	chia_sdrc_bap1_rbmc	chitinase-production_adhesion	2	2722702	Salinimicrobium oceani
GCA_001635675.1	19	['SRFAB|Q04747', 'Foo1|A1X158', 'ompA|A0A3B6XXR4', 'HfaB|P27343', 'SRFAA|P27206', 'OmpU|P0C6Q6', 'tpbB|A0A0H2Z7X0', 'ompW|A0A0F4PBB9', 'HfsD|Q9A5L5', 'HfsF|Q9A5M1', 'HfsE|Q9A5M2', 'HfsG|Q9A5M0', 'HfsH|Q9A5L9', 'yfiB|Q9I4L6', 'sipW|P54506', 'ChiA|P32823', 'HfsC|Q9A5L8', 'HfsA|Q9A5L6', 'SRFAD|Q08788']	5	hfs_hfacces_foo_chia_ompu	adhesion_chitinase-production	2	1822239	Oleiphilus sp. HI0061
GCA_002695775.1	9	['HfsD|Q9A5L5', 'HfsF|Q9A5M1', 'HfsE|Q9A5M2', 'HfsG|Q9A5M0', 'sdrC|A0A6A8FED6', 'yfiB|Q9I4L6', 'sipW|P54506', 'ChiA|P32823', 'SRFAD|Q08788']	2	chia_sdrc	chitinase-production_adhesion	2	2026742	Gemmatimonadetes bacterium
GCA_002690295.1	15	['HfsD|Q9A5L5', 'Foo1|A1X158', 'HfsG|Q9A5M0', 'HfsE|Q9A5M2', 'HfsH|Q9A5L9', 'tpbB|A0A0H2Z7X0', 'sdrC|A0A6A8FED6', 'ompA|A0A3B6XXR4', 'yfiB|Q9I4L6', 'GbpA|C3LW75', 'sipW|P54506', 'ChiA|P32823', 'HfsC|Q9A5L8', 'HfaB|P27343', 'SRFAD|Q08788']	5	hfacces_foo_chia_sdrc_gbpa	adhesion_chitinase-production	2	2026783	Pseudoalteromonadaceae bacterium
GCA_002728605.1	12	['SRFAA|P27206', 'SRFAB|Q04747', 'HfsF|Q9A5M1', 'HfsE|Q9A5M2', 'HfsG|Q9A5M0', 'SRFAC|Q08787', 'yfiB|Q9I4L6', 'sipW|P54506', 'RbmC|A0A2S1ZSI6', 'ChiA|P32823', 'HfsC|Q9A5L8', 'Bap1|Q9KQW0']	3	chia_bap1_rbmc	chitinase-production_adhesion	2	1871037	Flavobacteriaceae bacterium
GCA_001691235.1	18	['HfsD|Q9A5L5', 'OmpU|P0C6Q6', 'HfsG|Q9A5M0', 'HfsH|Q9A5L9', 'ompA|A0A3B6XXR4', 'tpbB|A0A0H2Z7X0', 'yfiB|Q9I4L6', 'ompW|A0A0F4PBB9', 'GbpA|C3LW75', 'sipW|P54506', 'RbmC|A0A2S1ZSI6', 'ChiA|P32823', 'HfsC|Q9A5L8', 'yfiR|Q9I4L4', 'HfaB|P27343', 'HfsA|Q9A5L6', 'Bap1|Q9KQW0', 'SRFAD|Q08788']	7	hfacces_chia_yfi_ompu_bap1_rbmc_gbpa	adhesion_chitinase-production	2	1840084	Vibrio sp. ZF57
GCA_014490725.1	17	['SRFAA|P27206', 'SRFAB|Q04747', 'HfsD|Q9A5L5', 'OmpU|P0C6Q6', 'HfsF|Q9A5M1', 'HfsE|Q9A5M2', 'HfsG|Q9A5M0', 'HfsH|Q9A5L9', 'sdrC|A0A6A8FED6', 'SRFAC|Q08787', 'yfiB|Q9I4L6', 'sipW|P54506', 'RbmC|A0A2S1ZSI6', 'HfsC|Q9A5L8', 'HfsA|Q9A5L6', 'Bap1|Q9KQW0', 'SRFAD|Q08788']	6	srf_hfs_ompu_sdrc_bap1_rbmc	drag-reducing_adhesion	2	2760093	Paracoccus amoyensis
GCA_002689705.1	11	['HfsD|Q9A5L5', 'Foo1|A1X158', 'HfsF|Q9A5M1', 'HfsH|Q9A5L9', 'HfsG|Q9A5M0', 'ompA|A0A3B6XXR4', 'yfiB|Q9I4L6', 'sipW|P54506', 'ChiA|P32823', 'HfaB|P27343', 'SRFAD|Q08788']	3	hfacces_foo_chia	adhesion_chitinase-production	2	2024839	Marinovum sp.
GCA_001635605.1	15	['SRFAA|P27206', 'SRFAB|Q04747', 'HfsD|Q9A5L5', 'OmpU|P0C6Q6', 'HfsF|Q9A5M1', 'bslB|P39632', 'HfsG|Q9A5M0', 'HfsH|Q9A5L9', 'sdrC|A0A6A8FED6', 'SRFAD|Q08788', 'SRFAC|Q08787', 'yfiB|Q9I4L6', 'sipW|P54506', 'HfsA|Q9A5L6', 'bslA|P71014']	4	bsl_srf_ompu_sdrc	drag-reducing_adhesion	2	1822238	Sulfitobacter sp. HI0054
GCA_000760315.1	9	['HfsF|Q9A5M1', 'HfsE|Q9A5M2', 'HfsG|Q9A5M0', 'yfiB|Q9I4L6', 'sipW|P54506', 'ChiA|P32823', 'HfsC|Q9A5L8', 'HfaB|P27343', 'SRFAD|Q08788']	2	hfacces_chia	adhesion_chitinase-production	2	1499503	Prochlorococcus sp. MIT 0702
GCA_002729225.1	8	['HfsD|Q9A5L5', 'OmpU|P0C6Q6', 'HfsG|Q9A5M0', 'HfsH|Q9A5L9', 'yfiB|Q9I4L6', 'ChiA|P32823', 'HfsC|Q9A5L8', 'SRFAD|Q08788']	2	chia_ompu	chitinase-production_adhesion	2	2026769	Nitrospinae bacterium
GCA_003025415.1	19	['ompA|A0A3B6XXR4', 'HfaB|P27343', 'OmpU|P0C6Q6', 'tpbB|A0A0H2Z7X0', 'RbmC|A0A2S1ZSI6', 'Bap1|Q9KQW0', 'HfsD|Q9A5L5', 'HfsF|Q9A5M1', 'HfsH|Q9A5L9', 'HfsG|Q9A5M0', 'yfiB|Q9I4L6', 'sipW|P54506', 'ChiA|P32823', 'HfsC|Q9A5L8', 'yfiR|Q9I4L4', 'HfsA|Q9A5L6', 'sdrC|A0A6A8FED6', 'GbpA|C3LW75', 'SRFAD|Q08788']	8	hfacces_chia_yfi_ompu_sdrc_bap1_rbmc_gbpa	adhesion_chitinase-production	2	512643	Photobacterium aquimaris
GCA_013249065.1	16	['HfsD|Q9A5L5', 'HfsF|Q9A5M1', 'HfsE|Q9A5M2', 'HfsH|Q9A5L9', 'HfsG|Q9A5M0', 'tpbB|A0A0H2Z7X0', 'sdrC|A0A6A8FED6', 'yfiB|Q9I4L6', 'sipW|P54506', 'RbmC|A0A2S1ZSI6', 'ChiA|P32823', 'HfsC|Q9A5L8', 'HfaB|P27343', 'HfsA|Q9A5L6', 'Bap1|Q9KQW0', 'SRFAD|Q08788']	6	hfs_hfacces_chia_sdrc_bap1_rbmc	adhesion_chitinase-production	2	1220182	Winogradskyella litoriviva
GCA_002687125.1	12	['SRFAA|P27206', 'SRFAB|Q04747', 'Foo1|A1X158', 'HfsF|Q9A5M1', 'HfsE|Q9A5M2', 'HfsG|Q9A5M0', 'HfsH|Q9A5L9', 'tpbB|A0A0H2Z7X0', 'SRFAC|Q08787', 'sipW|P54506', 'ChiA|P32823', 'HfsC|Q9A5L8']	2	foo_chia	adhesion_chitinase-production	2	2026774	Parcubacteria group bacterium
GCA_000439495.1	21	['Foo1|A1X158', 'ompA|A0A3B6XXR4', 'HfaB|P27343', 'OmpU|P0C6Q6', 'tpbB|A0A0H2Z7X0', 'ompW|A0A0F4PBB9', 'RbmC|A0A2S1ZSI6', 'Bap1|Q9KQW0', 'pilF|A0A290TXQ9', 'HfsD|Q9A5L5', 'HfsF|Q9A5M1', 'HfsE|Q9A5M2', 'HfsH|Q9A5L9', 'HfsG|Q9A5M0', 'yfiB|Q9I4L6', 'sipW|P54506', 'ChiA|P32823', 'HfsC|Q9A5L8', 'HfsA|Q9A5L6', 'sdrC|A0A6A8FED6', 'SRFAD|Q08788']	9	hfs_hfacces_foo_chia_omp_ompu_sdrc_bap1_rbmc	adhesion_chitinase-production	2	1300254	Alteromonas mediterranea
GCA_005885675.1	16	['HfsD|Q9A5L5', 'OmpU|P0C6Q6', 'HfsF|Q9A5M1', 'HfsE|Q9A5M2', 'HfsH|Q9A5L9', 'HfsG|Q9A5M0', 'tpbB|A0A0H2Z7X0', 'sdrC|A0A6A8FED6', 'yfiB|Q9I4L6', 'sipW|P54506', 'RbmC|A0A2S1ZSI6', 'ChiA|P32823', 'HfsC|Q9A5L8', 'HfsA|Q9A5L6', 'Bap1|Q9KQW0', 'SRFAD|Q08788']	6	hfs_chia_ompu_sdrc_bap1_rbmc	adhesion_chitinase-production	2	2304626	Polaribacter aestuariivivens
GCA_002719835.1	13	['HfsD|Q9A5L5', 'HfsF|Q9A5M1', 'HfsE|Q9A5M2', 'HfsH|Q9A5L9', 'HfsG|Q9A5M0', 'sdrC|A0A6A8FED6', 'ompA|A0A3B6XXR4', 'yfiB|Q9I4L6', 'sipW|P54506', 'ChiA|P32823', 'HfsC|Q9A5L8', 'HfaB|P27343', 'HfsA|Q9A5L6']	4	hfs_hfacces_chia_sdrc	adhesion_chitinase-production	2	2026760	Candidatus Marinimicrobia bacterium
GCA_002729525.1	14	['HfsD|Q9A5L5', 'Foo1|A1X158', 'HfsF|Q9A5M1', 'HfsE|Q9A5M2', 'HfsH|Q9A5L9', 'HfsG|Q9A5M0', 'sdrC|A0A6A8FED6', 'ompA|A0A3B6XXR4', 'yfiB|Q9I4L6', 'sipW|P54506', 'ChiA|P32823', 'HfsC|Q9A5L8', 'HfsA|Q9A5L6', 'SRFAD|Q08788']	4	hfs_foo_chia_sdrc	adhesion_chitinase-production	2	35761	Nocardioides sp.
GCA_002685435.1	10	['HfsF|Q9A5M1', 'HfsE|Q9A5M2', 'HfsG|Q9A5M0', 'sdrC|A0A6A8FED6', 'yfiB|Q9I4L6', 'sipW|P54506', 'ChiA|P32823', 'HfsC|Q9A5L8', 'HfsA|Q9A5L6', 'SRFAD|Q08788']	2	chia_sdrc	chitinase-production_adhesion	2	1898111	Cryomorphaceae bacterium
GCA_014306105.1	15	['HfsD|Q9A5L5', 'Foo1|A1X158', 'HfsF|Q9A5M1', 'HfsE|Q9A5M2', 'HfsH|Q9A5L9', 'HfsG|Q9A5M0', 'tpbB|A0A0H2Z7X0', 'sdrC|A0A6A8FED6', 'ompA|A0A3B6XXR4', 'yfiB|Q9I4L6', 'sipW|P54506', 'ChiA|P32823', 'HfsC|Q9A5L8', 'HfsA|Q9A5L6', 'SRFAD|Q08788']	4	hfs_foo_chia_sdrc	adhesion_chitinase-production	2	1720253	Pontibacter cellulosilyticus
GCA_002707095.1	18	['HfsD|Q9A5L5', 'Foo1|A1X158', 'HfsF|Q9A5M1', 'HfsE|Q9A5M2', 'HfsH|Q9A5L9', 'HfsG|Q9A5M0', 'OmpU|P0C6Q6', 'tpbB|A0A0H2Z7X0', 'ompA|A0A3B6XXR4', 'yfiB|Q9I4L6', 'ompW|A0A0F4PBB9', 'sipW|P54506', 'RbmC|A0A2S1ZSI6', 'ChiA|P32823', 'HfsC|Q9A5L8', 'HfsA|Q9A5L6', 'Bap1|Q9KQW0', 'SRFAD|Q08788']	6	hfs_foo_chia_ompu_bap1_rbmc	adhesion_chitinase-production	2	1932666	Haliea sp.
GCA_001029455.1	22	['SRFAB|Q04747', 'ompA|A0A3B6XXR4', 'HfaB|P27343', 'SRFAA|P27206', 'OmpU|P0C6Q6', 'tpbB|A0A0H2Z7X0', 'ompW|A0A0F4PBB9', 'RbmC|A0A2S1ZSI6', 'Bap1|Q9KQW0', 'HfsD|Q9A5L5', 'HfsF|Q9A5M1', 'HfsE|Q9A5M2', 'HfsG|Q9A5M0', 'HfsH|Q9A5L9', 'yfiB|Q9I4L6', 'sipW|P54506', 'ChiA|P32823', 'HfsC|Q9A5L8', 'yfiR|Q9I4L4', 'HfsA|Q9A5L6', 'GbpA|C3LW75', 'SRFAD|Q08788']	8	hfs_hfacces_chia_yfi_ompu_bap1_rbmc_gbpa	adhesion_chitinase-production	2	320778	Photobacterium ganghwense
GCA_000307105.1	16	['SRFAA|P27206', 'SRFAB|Q04747', 'HfsD|Q9A5L5', 'HfsF|Q9A5M1', 'HfsE|Q9A5M2', 'HfsG|Q9A5M0', 'HfsH|Q9A5L9', 'sdrC|A0A6A8FED6', 'SRFAC|Q08787', 'yfiB|Q9I4L6', 'sipW|P54506', 'HfsC|Q9A5L8', 'yfiR|Q9I4L4', 'HfaB|P27343', 'HfsA|Q9A5L6', 'SRFAD|Q08788']	4	srf_hfs_hfacces_sdrc	drag-reducing_adhesion	2	651182	Desulfobacula toluolica
GCA_001664505.1	16	['HfsD|Q9A5L5', 'HfsF|Q9A5M1', 'HfsE|Q9A5M2', 'HfsH|Q9A5L9', 'HfsG|Q9A5M0', 'sdrC|A0A6A8FED6', 'yfiB|Q9I4L6', 'ompW|A0A0F4PBB9', 'sipW|P54506', 'RbmC|A0A2S1ZSI6', 'ChiA|P32823', 'HfsC|Q9A5L8', 'yfiR|Q9I4L4', 'HfaB|P27343', 'HfsA|Q9A5L6', 'Bap1|Q9KQW0']	6	hfs_hfacces_chia_sdrc_bap1_rbmc	adhesion_chitinase-production	2	1660251	Acidobacteria bacterium Mor1
GCA_002691025.1	14	['SRFAA|P27206', 'SRFAB|Q04747', 'HfsD|Q9A5L5', 'HfsG|Q9A5M0', 'HfsE|Q9A5M2', 'HfsH|Q9A5L9', 'SRFAC|Q08787', 'yfiB|Q9I4L6', 'GbpA|C3LW75', 'sipW|P54506', 'HfsC|Q9A5L8', 'HfaB|P27343', 'HfsA|Q9A5L6', 'SRFAD|Q08788']	3	srf_hfacces_gbpa	drag-reducing_adhesion	2	28185	Spirochaeta sp.
GCA_000427335.1	17	['SRFAA|P27206', 'SRFAB|Q04747', 'HfsD|Q9A5L5', 'Foo1|A1X158', 'HfsF|Q9A5M1', 'HfsE|Q9A5M2', 'HfsG|Q9A5M0', 'HfsH|Q9A5L9', 'tpbB|A0A0H2Z7X0', 'sdrC|A0A6A8FED6', 'yfiB|Q9I4L6', 'sipW|P54506', 'ChiA|P32823', 'HfsC|Q9A5L8', 'HfaB|P27343', 'HfsA|Q9A5L6', 'SRFAD|Q08788']	5	hfs_hfacces_foo_chia_sdrc	adhesion_chitinase-production	2	641526	Winogradskyella psychrotolerans
GCA_002716765.1	14	['Foo1|A1X158', 'HfsF|Q9A5M1', 'HfsE|Q9A5M2', 'HfsG|Q9A5M0', 'HfsH|Q9A5L9', 'sdrC|A0A6A8FED6', 'SRFAC|Q08787', 'sipW|P54506', 'RbmC|A0A2S1ZSI6', 'ChiA|P32823', 'HfsC|Q9A5L8', 'HfsA|Q9A5L6', 'Bap1|Q9KQW0', 'SRFAD|Q08788']	5	foo_chia_sdrc_bap1_rbmc	adhesion_chitinase-production	2	2026717	Candidatus Magasanikbacteria bacterium
GCA_002702575.1	12	['HfsD|Q9A5L5', 'HfsF|Q9A5M1', 'HfsE|Q9A5M2', 'HfsH|Q9A5L9', 'HfsG|Q9A5M0', 'sdrC|A0A6A8FED6', 'yfiB|Q9I4L6', 'GbpA|C3LW75', 'sipW|P54506', 'ChiA|P32823', 'HfsC|Q9A5L8', 'SRFAD|Q08788']	3	chia_sdrc_gbpa	chitinase-production_adhesion	2	2026778	Phycisphaerae bacterium
GCA_002722915.1	13	['SRFAA|P27206', 'SRFAB|Q04747', 'HfsF|Q9A5M1', 'HfsE|Q9A5M2', 'HfsG|Q9A5M0', 'HfsH|Q9A5L9', 'sdrC|A0A6A8FED6', 'yfiB|Q9I4L6', 'sipW|P54506', 'ChiA|P32823', 'HfsC|Q9A5L8', 'HfaB|P27343', 'SRFAD|Q08788']	3	hfacces_chia_sdrc	adhesion_chitinase-production	2	1978231	Acidobacteria bacterium
GCA_900116235.1	14	['SRFAA|P27206', 'SRFAB|Q04747', 'HfsD|Q9A5L5', 'Foo1|A1X158', 'HfsF|Q9A5M1', 'HfsE|Q9A5M2', 'HfsG|Q9A5M0', 'HfsH|Q9A5L9', 'SRFAC|Q08787', 'sipW|P54506', 'RbmC|A0A2S1ZSI6', 'HfsC|Q9A5L8', 'Bap1|Q9KQW0', 'SRFAD|Q08788']	4	srf_foo_bap1_rbmc	drag-reducing_adhesion	2	1155944	Marininema halotolerans
GCA_000158575.1	18	['SRFAA|P27206', 'SRFAB|Q04747', 'HfsD|Q9A5L5', 'OmpU|P0C6Q6', 'HfsF|Q9A5M1', 'HfsE|Q9A5M2', 'HfsG|Q9A5M0', 'HfsH|Q9A5L9', 'sdrC|A0A6A8FED6', 'ompA|A0A3B6XXR4', 'SRFAC|Q08787', 'yfiB|Q9I4L6', 'ompW|A0A0F4PBB9', 'GbpA|C3LW75', 'sipW|P54506', 'HfsC|Q9A5L8', 'HfaB|P27343', 'SRFAD|Q08788']	5	srf_hfacces_ompu_sdrc_gbpa	drag-reducing_adhesion	2	391601	Stenotrophomonas sp. SKA14
GCA_000940995.1	18	['SRFAA|P27206', 'SRFAB|Q04747', 'HfsD|Q9A5L5', 'OmpU|P0C6Q6', 'HfsF|Q9A5M1', 'HfsE|Q9A5M2', 'HfsG|Q9A5M0', 'HfsH|Q9A5L9', 'tpbB|A0A0H2Z7X0', 'ompA|A0A3B6XXR4', 'yfiB|Q9I4L6', 'GbpA|C3LW75', 'sipW|P54506', 'ChiA|P32823', 'HfsC|Q9A5L8', 'HfaB|P27343', 'HfsA|Q9A5L6', 'SRFAD|Q08788']	5	hfs_hfacces_chia_ompu_gbpa	adhesion_chitinase-production	2	658445	Photobacterium gaetbulicola
GCA_001458275.1	16	['SRFAA|P27206', 'SRFAB|Q04747', 'HfsD|Q9A5L5', 'Foo1|A1X158', 'HfsF|Q9A5M1', 'bslB|P39632', 'HfsG|Q9A5M0', 'HfsH|Q9A5L9', 'OmpU|P0C6Q6', 'SRFAD|Q08788', 'sdrC|A0A6A8FED6', 'yfiB|Q9I4L6', 'sipW|P54506', 'HfsC|Q9A5L8', 'HfsA|Q9A5L6', 'bslA|P71014']	4	bsl_foo_ompu_sdrc	drag-reducing_adhesion	2	2072972	Thalassobius autumnalis
GCA_900182725.1	13	['SRFAA|P27206', 'SRFAB|Q04747', 'HfsD|Q9A5L5', 'OmpU|P0C6Q6', 'HfsF|Q9A5M1', 'HfsG|Q9A5M0', 'HfsH|Q9A5L9', 'SRFAC|Q08787', 'yfiB|Q9I4L6', 'sipW|P54506', 'HfaB|P27343', 'HfsA|Q9A5L6', 'SRFAD|Q08788']	3	srf_hfacces_ompu	drag-reducing_adhesion	2	1010611	Thalassobius litoralis
GCA_002731795.1	16	['HfsD|Q9A5L5', 'HfsF|Q9A5M1', 'HfsE|Q9A5M2', 'HfsH|Q9A5L9', 'HfsG|Q9A5M0', 'tpbB|A0A0H2Z7X0', 'sdrC|A0A6A8FED6', 'SRFAC|Q08787', 'yfiB|Q9I4L6', 'sipW|P54506', 'RbmC|A0A2S1ZSI6', 'ChiA|P32823', 'HfsC|Q9A5L8', 'HfaB|P27343', 'HfsA|Q9A5L6', 'Bap1|Q9KQW0']	6	hfs_hfacces_chia_sdrc_bap1_rbmc	adhesion_chitinase-production	2	2026760	Candidatus Marinimicrobia bacterium
GCA_006228125.1	16	['SRFAA|P27206', 'SRFAB|Q04747', 'HfsD|Q9A5L5', 'Foo1|A1X158', 'HfsG|Q9A5M0', 'HfsE|Q9A5M2', 'HfsH|Q9A5L9', 'tpbB|A0A0H2Z7X0', 'ompA|A0A3B6XXR4', 'SRFAC|Q08787', 'yfiB|Q9I4L6', 'GbpA|C3LW75', 'sipW|P54506', 'HfsC|Q9A5L8', 'HfsA|Q9A5L6', 'SRFAD|Q08788']	3	srf_foo_gbpa	drag-reducing_adhesion	2	1420891	Micromonospora orduensis
GCA_002697785.1	14	['HfsD|Q9A5L5', 'OmpU|P0C6Q6', 'HfsF|Q9A5M1', 'HfsE|Q9A5M2', 'HfsH|Q9A5L9', 'HfsG|Q9A5M0', 'yfiB|Q9I4L6', 'sipW|P54506', 'RbmC|A0A2S1ZSI6', 'ChiA|P32823', 'HfsC|Q9A5L8', 'HfsA|Q9A5L6', 'Bap1|Q9KQW0', 'SRFAD|Q08788']	5	hfs_chia_ompu_bap1_rbmc	adhesion_chitinase-production	2	1904441	Rhodobacteraceae bacterium
GCA_002709555.1	13	['HfsD|Q9A5L5', 'OmpU|P0C6Q6', 'HfsG|Q9A5M0', 'HfsH|Q9A5L9', 'sdrC|A0A6A8FED6', 'ompA|A0A3B6XXR4', 'yfiB|Q9I4L6', 'ompW|A0A0F4PBB9', 'pilF|A0A290TXQ9', 'sipW|P54506', 'ChiA|P32823', 'HfsA|Q9A5L6', 'SRFAD|Q08788']	4	chia_omp_ompu_sdrc	chitinase-production_adhesion	2	2026788	Rickettsiales bacterium
GCA_000808595.1	20	['Foo1|A1X158', 'ompA|A0A3B6XXR4', 'HfaB|P27343', 'OmpU|P0C6Q6', 'tpbB|A0A0H2Z7X0', 'ompW|A0A0F4PBB9', 'pilF|A0A290TXQ9', 'HfsD|Q9A5L5', 'HfsF|Q9A5M1', 'HfsE|Q9A5M2', 'HfsH|Q9A5L9', 'HfsG|Q9A5M0', 'yfiB|Q9I4L6', 'sipW|P54506', 'ChiA|P32823', 'HfsC|Q9A5L8', 'HfsA|Q9A5L6', 'sdrC|A0A6A8FED6', 'GbpA|C3LW75', 'SRFAD|Q08788']	8	hfs_hfacces_foo_chia_omp_ompu_sdrc_gbpa	adhesion_chitinase-production	2	28108	Alteromonas macleodii
GCA_002709125.1	14	['HfsD|Q9A5L5', 'Foo1|A1X158', 'HfsG|Q9A5M0', 'HfsH|Q9A5L9', 'OmpU|P0C6Q6', 'tpbB|A0A0H2Z7X0', 'sdrC|A0A6A8FED6', 'ompA|A0A3B6XXR4', 'yfiB|Q9I4L6', 'ompW|A0A0F4PBB9', 'sipW|P54506', 'ChiA|P32823', 'HfsC|Q9A5L8', 'SRFAD|Q08788']	4	foo_chia_ompu_sdrc	adhesion_chitinase-production	2	2026788	Rickettsiales bacterium
GCA_002716325.1	14	['SRFAA|P27206', 'SRFAB|Q04747', 'HfsD|Q9A5L5', 'HfsF|Q9A5M1', 'HfsG|Q9A5M0', 'HfsH|Q9A5L9', 'tpbB|A0A0H2Z7X0', 'sdrC|A0A6A8FED6', 'ompA|A0A3B6XXR4', 'yfiB|Q9I4L6', 'sipW|P54506', 'ChiA|P32823', 'HfaB|P27343', 'SRFAD|Q08788']	3	hfacces_chia_sdrc	adhesion_chitinase-production	2	2026791	Bryobacterales bacterium
GCA_000024725.1	16	['SRFAA|P27206', 'SRFAB|Q04747', 'HfsD|Q9A5L5', 'OmpU|P0C6Q6', 'HfsF|Q9A5M1', 'HfsE|Q9A5M2', 'HfsG|Q9A5M0', 'HfsH|Q9A5L9', 'tpbB|A0A0H2Z7X0', 'sdrC|A0A6A8FED6', 'SRFAC|Q08787', 'yfiB|Q9I4L6', 'sipW|P54506', 'HfsC|Q9A5L8', 'HfsA|Q9A5L6', 'SRFAD|Q08788']	4	srf_hfs_ompu_sdrc	drag-reducing_adhesion	2	472759	Nitrosococcus halophilus
GCA_001413955.1	16	['HfsD|Q9A5L5', 'Foo1|A1X158', 'HfsF|Q9A5M1', 'HfsE|Q9A5M2', 'HfsH|Q9A5L9', 'HfsG|Q9A5M0', 'OmpU|P0C6Q6', 'tpbB|A0A0H2Z7X0', 'ompA|A0A3B6XXR4', 'yfiB|Q9I4L6', 'ompW|A0A0F4PBB9', 'sipW|P54506', 'ChiA|P32823', 'HfsC|Q9A5L8', 'HfsA|Q9A5L6', 'SRFAD|Q08788']	4	hfs_foo_chia_ompu	adhesion_chitinase-production	2	346185	Muricauda eckloniae
GCA_900188235.1	18	['HfsD|Q9A5L5', 'OmpU|P0C6Q6', 'HfsF|Q9A5M1', 'HfsE|Q9A5M2', 'HfsH|Q9A5L9', 'HfsG|Q9A5M0', 'tpbB|A0A0H2Z7X0', 'sdrC|A0A6A8FED6', 'ompA|A0A3B6XXR4', 'yfiB|Q9I4L6', 'sipW|P54506', 'RbmC|A0A2S1ZSI6', 'ChiA|P32823', 'HfsC|Q9A5L8', 'HfaB|P27343', 'HfsA|Q9A5L6', 'Bap1|Q9KQW0', 'SRFAD|Q08788']	7	hfs_hfacces_chia_ompu_sdrc_bap1_rbmc	adhesion_chitinase-production	2	1109740	Lutibacter agarilyticus
GCA_002708885.1	16	['SRFAA|P27206', 'SRFAB|Q04747', 'HfsD|Q9A5L5', 'HfsF|Q9A5M1', 'HfsE|Q9A5M2', 'HfsG|Q9A5M0', 'HfsH|Q9A5L9', 'tpbB|A0A0H2Z7X0', 'sdrC|A0A6A8FED6', 'yfiB|Q9I4L6', 'GbpA|C3LW75', 'sipW|P54506', 'ChiA|P32823', 'HfsC|Q9A5L8', 'HfsA|Q9A5L6', 'SRFAD|Q08788']	4	hfs_chia_sdrc_gbpa	adhesion_chitinase-production	2	2026801	Verrucomicrobiales bacterium
GCA_001690985.1	14	['HfsD|Q9A5L5', 'OmpU|P0C6Q6', 'HfsG|Q9A5M0', 'HfsE|Q9A5M2', 'ompA|A0A3B6XXR4', 'yfiB|Q9I4L6', 'GbpA|C3LW75', 'sipW|P54506', 'ChiA|P32823', 'HfsC|Q9A5L8', 'yfiR|Q9I4L4', 'HfaB|P27343', 'HfsA|Q9A5L6', 'SRFAD|Q08788']	4	hfacces_chia_ompu_gbpa	adhesion_chitinase-production	2	1840087	Aliivibrio sp. 1S175
GCA_001678945.1	18	['SRFAA|P27206', 'SRFAB|Q04747', 'HfsD|Q9A5L5', 'OmpU|P0C6Q6', 'HfsF|Q9A5M1', 'bslB|P39632', 'HfsE|Q9A5M2', 'HfsG|Q9A5M0', 'HfsH|Q9A5L9', 'SRFAD|Q08788', 'tpbB|A0A0H2Z7X0', 'yfiB|Q9I4L6', 'ompW|A0A0F4PBB9', 'sipW|P54506', 'HfsC|Q9A5L8', 'HfaB|P27343', 'HfsA|Q9A5L6', 'bslA|P71014']	4	bsl_hfs_hfacces_ompu	drag-reducing_adhesion	2	60890	Phaeobacter gallaeciensis
GCA_014077375.1	19	['Foo1|A1X158', 'ompA|A0A3B6XXR4', 'HfaB|P27343', 'OmpU|P0C6Q6', 'tpbB|A0A0H2Z7X0', 'ompW|A0A0F4PBB9', 'pilF|A0A290TXQ9', 'HfsD|Q9A5L5', 'HfsF|Q9A5M1', 'HfsH|Q9A5L9', 'HfsG|Q9A5M0', 'yfiB|Q9I4L6', 'sipW|P54506', 'ChiA|P32823', 'HfsC|Q9A5L8', 'yfiR|Q9I4L4', 'HfsA|Q9A5L6', 'sdrC|A0A6A8FED6', 'SRFAD|Q08788']	7	hfacces_foo_chia_omp_yfi_ompu_sdrc	adhesion_chitinase-production	2	2759838	Colwellia sp. BRX8-2
GCA_004405125.1	16	['HfsD|Q9A5L5', 'Foo1|A1X158', 'HfsF|Q9A5M1', 'HfsH|Q9A5L9', 'HfsG|Q9A5M0', 'tpbB|A0A0H2Z7X0', 'tasA|P54507', 'ompA|A0A3B6XXR4', 'yfiB|Q9I4L6', 'sipW|P54506', 'RbmC|A0A2S1ZSI6', 'ChiA|P32823', 'HfsC|Q9A5L8', 'HfsA|Q9A5L6', 'Bap1|Q9KQW0', 'SRFAD|Q08788']	5	foo_chia_tapA_bap1_rbmc	adhesion_chitinase-production	2	546023	Jeotgalibacillus salarius
GCA_018457175.1	10	['HfsD|Q9A5L5', 'OmpU|P0C6Q6', 'HfsF|Q9A5M1', 'HfsH|Q9A5L9', 'HfsG|Q9A5M0', 'yfiB|Q9I4L6', 'ompW|A0A0F4PBB9', 'sipW|P54506', 'ChiA|P32823', 'SRFAD|Q08788']	2	chia_ompu	chitinase-production_adhesion	2	1591409	Pseudohalocynthiibacter aestuariivivens
GCA_002702365.1	15	['HfsD|Q9A5L5', 'Foo1|A1X158', 'HfsF|Q9A5M1', 'HfsE|Q9A5M2', 'HfsH|Q9A5L9', 'HfsG|Q9A5M0', 'tpbB|A0A0H2Z7X0', 'sdrC|A0A6A8FED6', 'yfiB|Q9I4L6', 'sipW|P54506', 'ChiA|P32823', 'HfsC|Q9A5L8', 'yfiR|Q9I4L4', 'HfsA|Q9A5L6', 'SRFAD|Q08788']	5	hfs_foo_chia_yfi_sdrc	adhesion_chitinase-production	2	2026728	Crocinitomicaceae bacterium
GCA_000756615.1	15	['SRFAA|P27206', 'SRFAB|Q04747', 'HfsF|Q9A5M1', 'HfsE|Q9A5M2', 'HfsG|Q9A5M0', 'HfsH|Q9A5L9', 'tpbB|A0A0H2Z7X0', 'sdrC|A0A6A8FED6', 'SRFAC|Q08787', 'ompA|A0A3B6XXR4', 'yfiB|Q9I4L6', 'sipW|P54506', 'HfsC|Q9A5L8', 'HfsA|Q9A5L6', 'SRFAD|Q08788']	2	srf_sdrc	drag-reducing_adhesion	2	44251	Paenibacillus durus
GCA_002727735.1	18	['SRFAA|P27206', 'SRFAB|Q04747', 'HfsD|Q9A5L5', 'OmpU|P0C6Q6', 'HfsG|Q9A5M0', 'HfsE|Q9A5M2', 'HfsH|Q9A5L9', 'tpbB|A0A0H2Z7X0', 'yfiB|Q9I4L6', 'sipW|P54506', 'RbmC|A0A2S1ZSI6', 'ChiA|P32823', 'HfsC|Q9A5L8', 'yfiR|Q9I4L4', 'HfaB|P27343', 'HfsA|Q9A5L6', 'Bap1|Q9KQW0', 'SRFAD|Q08788']	6	hfacces_chia_yfi_ompu_bap1_rbmc	adhesion_chitinase-production	2	2026728	Crocinitomicaceae bacterium
GCA_900129915.1	16	['SRFAA|P27206', 'SRFAB|Q04747', 'HfsD|Q9A5L5', 'HfsF|Q9A5M1', 'HfsE|Q9A5M2', 'HfsG|Q9A5M0', 'HfsH|Q9A5L9', 'sdrC|A0A6A8FED6', 'ompA|A0A3B6XXR4', 'SRFAC|Q08787', 'yfiB|Q9I4L6', 'sipW|P54506', 'RbmC|A0A2S1ZSI6', 'ChiA|P32823', 'HfsC|Q9A5L8', 'Bap1|Q9KQW0']	4	chia_sdrc_bap1_rbmc	chitinase-production_adhesion	2	1123350	Tepidibacter thalassicus
GCA_002691095.1	12	['SRFAA|P27206', 'SRFAB|Q04747', 'HfsF|Q9A5M1', 'HfsE|Q9A5M2', 'HfsG|Q9A5M0', 'HfsH|Q9A5L9', 'SRFAC|Q08787', 'yfiB|Q9I4L6', 'sipW|P54506', 'ChiA|P32823', 'HfsC|Q9A5L8', 'HfaB|P27343']	2	hfacces_chia	adhesion_chitinase-production	2	2026752	Kiritimatiellaceae bacterium
GCA_001303285.1	13	['HfsD|Q9A5L5', 'Foo1|A1X158', 'HfsF|Q9A5M1', 'HfsE|Q9A5M2', 'HfsH|Q9A5L9', 'HfsG|Q9A5M0', 'OmpU|P0C6Q6', 'sdrC|A0A6A8FED6', 'yfiB|Q9I4L6', 'ompW|A0A0F4PBB9', 'sipW|P54506', 'ChiA|P32823', 'SRFAD|Q08788']	4	foo_chia_ompu_sdrc	adhesion_chitinase-production	2	1703405	Gammaproteobacteria bacterium SG8_31
GCA_002721695.1	15	['HfsD|Q9A5L5', 'OmpU|P0C6Q6', 'HfsF|Q9A5M1', 'HfsE|Q9A5M2', 'HfsH|Q9A5L9', 'HfsG|Q9A5M0', 'tpbB|A0A0H2Z7X0', 'sdrC|A0A6A8FED6', 'yfiB|Q9I4L6', 'GbpA|C3LW75', 'sipW|P54506', 'ChiA|P32823', 'HfsC|Q9A5L8', 'HfsA|Q9A5L6', 'SRFAD|Q08788']	5	hfs_chia_ompu_sdrc_gbpa	adhesion_chitinase-production	2	2024856	Roseibacillus sp.
GCA_002705125.1	13	['HfsD|Q9A5L5', 'HfsF|Q9A5M1', 'HfsE|Q9A5M2', 'HfsH|Q9A5L9', 'HfsG|Q9A5M0', 'tpbB|A0A0H2Z7X0', 'sdrC|A0A6A8FED6', 'yfiB|Q9I4L6', 'sipW|P54506', 'ChiA|P32823', 'HfsC|Q9A5L8', 'HfsA|Q9A5L6', 'SRFAD|Q08788']	3	hfs_chia_sdrc	adhesion_chitinase-production	2	2026801	Verrucomicrobiales bacterium
GCA_002701645.1	12	['SRFAA|P27206', 'SRFAB|Q04747', 'HfsD|Q9A5L5', 'HfsF|Q9A5M1', 'HfsE|Q9A5M2', 'HfsG|Q9A5M0', 'sdrC|A0A6A8FED6', 'ompA|A0A3B6XXR4', 'SRFAC|Q08787', 'RbmC|A0A2S1ZSI6', 'ChiA|P32823', 'Bap1|Q9KQW0']	4	chia_sdrc_bap1_rbmc	chitinase-production_adhesion	2	2026760	Candidatus Marinimicrobia bacterium
GCA_000294775.2	15	['SRFAA|P27206', 'SRFAB|Q04747', 'HfsD|Q9A5L5', 'HfsF|Q9A5M1', 'HfsG|Q9A5M0', 'HfsH|Q9A5L9', 'sdrC|A0A6A8FED6', 'tasA|P54507', 'ompA|A0A3B6XXR4', 'SRFAC|Q08787', 'yfiB|Q9I4L6', 'sipW|P54506', 'HfsC|Q9A5L8', 'HfsA|Q9A5L6', 'SRFAD|Q08788']	3	srf_tapA_sdrc	drag-reducing_adhesion	2	1196031	Cytobacillus oceanisediminis
GCA_000507245.1	12	['HfsD|Q9A5L5', 'HfsF|Q9A5M1', 'HfsE|Q9A5M2', 'HfsH|Q9A5L9', 'HfsG|Q9A5M0', 'ompA|A0A3B6XXR4', 'yfiB|Q9I4L6', 'sipW|P54506', 'ChiA|P32823', 'HfsC|Q9A5L8', 'HfsA|Q9A5L6', 'SRFAD|Q08788']	2	hfs_chia	adhesion_chitinase-production	2	1307761	Salinispira pacifica
GCA_001971745.1	16	['HfsD|Q9A5L5', 'Foo1|A1X158', 'HfsF|Q9A5M1', 'HfsE|Q9A5M2', 'HfsH|Q9A5L9', 'HfsG|Q9A5M0', 'tpbB|A0A0H2Z7X0', 'sdrC|A0A6A8FED6', 'yfiB|Q9I4L6', 'ompW|A0A0F4PBB9', 'sipW|P54506', 'ChiA|P32823', 'HfsC|Q9A5L8', 'HfaB|P27343', 'HfsA|Q9A5L6', 'SRFAD|Q08788']	5	hfs_hfacces_foo_chia_sdrc	adhesion_chitinase-production	2	1486034	Lacinutrix venerupis
GCA_001635595.1	19	['Foo1|A1X158', 'HfaB|P27343', 'OmpU|P0C6Q6', 'ompW|A0A0F4PBB9', 'RbmC|A0A2S1ZSI6', 'Bap1|Q9KQW0', 'HfsD|Q9A5L5', 'HfsG|Q9A5M0', 'HfsE|Q9A5M2', 'HfsH|Q9A5L9', 'yfiB|Q9I4L6', 'sipW|P54506', 'ChiA|P32823', 'HfsC|Q9A5L8', 'yfiR|Q9I4L4', 'HfsA|Q9A5L6', 'sdrC|A0A6A8FED6', 'GbpA|C3LW75', 'SRFAD|Q08788']	8	hfacces_foo_chia_ompu_sdrc_bap1_rbmc_gbpa	adhesion_chitinase-production	2	1190813	Pseudoalteromonas shioyasakiensis
GCA_011806385.1	12	['SRFAA|P27206', 'SRFAB|Q04747', 'HfsD|Q9A5L5', 'OmpU|P0C6Q6', 'HfsG|Q9A5M0', 'HfsH|Q9A5L9', 'SRFAC|Q08787', 'yfiB|Q9I4L6', 'ompW|A0A0F4PBB9', 'sipW|P54506', 'HfsA|Q9A5L6', 'SRFAD|Q08788']	2	srf_ompu	drag-reducing_adhesion	2	2721561	Phaeobacter sp. HF9A
GCA_011650445.1	23	['SRFAB|Q04747', 'CHPC|Q9AD93', 'Foo1|A1X158', 'ompA|A0A3B6XXR4', 'CHPE|Q9X9Z2', 'SRFAA|P27206', 'CHPG|Q9KYH3', 'CHPA|Q8CJY7', 'HfsD|Q9A5L5', 'HfsF|Q9A5M1', 'HfsE|Q9A5M2', 'HfsG|Q9A5M0', 'HfsH|Q9A5L9', 'SRFAC|Q08787', 'yfiB|Q9I4L6', 'CHPF|Q9KYG7', 'CHPH|Q9AD92', 'sipW|P54506', 'HfsA|Q9A5L6', 'CHPB|Q9X7U2', 'CHPD|Q9L1J9', 'GbpA|C3LW75', 'SRFAD|Q08788']	4	srf_chp_foo_gbpa	drag-reducing_adhesion	2	1821625	Streptomyces sp. VN1
GCA_002712395.1	5	['sdrC|A0A6A8FED6', 'HfsG|Q9A5M0', 'sipW|P54506', 'ChiA|P32823', 'SRFAD|Q08788']	2	chia_sdrc	chitinase-production_adhesion	2	2026779	Planctomycetaceae bacterium
GCA_001632105.1	10	['HfsD|Q9A5L5', 'HfsF|Q9A5M1', 'HfsG|Q9A5M0', 'sipW|P54506', 'RbmC|A0A2S1ZSI6', 'ChiA|P32823', 'HfsC|Q9A5L8', 'HfsA|Q9A5L6', 'Bap1|Q9KQW0', 'SRFAD|Q08788']	3	chia_bap1_rbmc	chitinase-production_adhesion	2	1801628	Synechococcus sp. MIT S9504
GCA_001632075.1	12	['HfsF|Q9A5M1', 'HfsE|Q9A5M2', 'HfsG|Q9A5M0', 'tpbB|A0A0H2Z7X0', 'yfiB|Q9I4L6', 'sipW|P54506', 'RbmC|A0A2S1ZSI6', 'ChiA|P32823', 'HfsC|Q9A5L8', 'HfaB|P27343', 'Bap1|Q9KQW0', 'SRFAD|Q08788']	4	hfacces_chia_bap1_rbmc	adhesion_chitinase-production	2	1801623	Prochlorococcus marinus
GCA_002704965.1	15	['HfsD|Q9A5L5', 'Foo1|A1X158', 'HfsF|Q9A5M1', 'HfsE|Q9A5M2', 'HfsH|Q9A5L9', 'HfsG|Q9A5M0', 'sdrC|A0A6A8FED6', 'yfiB|Q9I4L6', 'sipW|P54506', 'RbmC|A0A2S1ZSI6', 'ChiA|P32823', 'HfsC|Q9A5L8', 'HfsA|Q9A5L6', 'Bap1|Q9KQW0', 'SRFAD|Q08788']	6	hfs_foo_chia_sdrc_bap1_rbmc	adhesion_chitinase-production	2	2021391	Flavobacteriales bacterium
GCA_900109345.1	15	['SRFAA|P27206', 'SRFAB|Q04747', 'HfsD|Q9A5L5', 'Foo1|A1X158', 'HfsF|Q9A5M1', 'HfsE|Q9A5M2', 'HfsG|Q9A5M0', 'sdrC|A0A6A8FED6', 'ompA|A0A3B6XXR4', 'SRFAC|Q08787', 'yfiB|Q9I4L6', 'sipW|P54506', 'HfsC|Q9A5L8', 'HfsA|Q9A5L6', 'SRFAD|Q08788']	3	srf_foo_sdrc	drag-reducing_adhesion	2	228957	Maribacter orientalis
GCA_013364215.1	16	['SRFAA|P27206', 'SRFAB|Q04747', 'HfsD|Q9A5L5', 'HfsF|Q9A5M1', 'HfsE|Q9A5M2', 'HfsG|Q9A5M0', 'HfsH|Q9A5L9', 'tpbB|A0A0H2Z7X0', 'ompA|A0A3B6XXR4', 'SRFAC|Q08787', 'yfiB|Q9I4L6', 'GbpA|C3LW75', 'sipW|P54506', 'HfsC|Q9A5L8', 'HfsA|Q9A5L6', 'SRFAD|Q08788']	3	srf_hfs_gbpa	drag-reducing_adhesion	2	2742132	Verrucosispora sp. NA02020
GCA_002729915.1	16	['Foo1|A1X158', 'OmpU|P0C6Q6', 'HfsF|Q9A5M1', 'HfsE|Q9A5M2', 'HfsH|Q9A5L9', 'HfsG|Q9A5M0', 'sdrC|A0A6A8FED6', 'yfiB|Q9I4L6', 'ompW|A0A0F4PBB9', 'sipW|P54506', 'RbmC|A0A2S1ZSI6', 'ChiA|P32823', 'HfsC|Q9A5L8', 'HfaB|P27343', 'Bap1|Q9KQW0', 'SRFAD|Q08788']	7	hfacces_foo_chia_ompu_sdrc_bap1_rbmc	adhesion_chitinase-production	2	1874361	Idiomarina sp.
GCA_002715825.1	16	['HfsD|Q9A5L5', 'Foo1|A1X158', 'HfsF|Q9A5M1', 'HfsE|Q9A5M2', 'HfsH|Q9A5L9', 'HfsG|Q9A5M0', 'OmpU|P0C6Q6', 'tpbB|A0A0H2Z7X0', 'sdrC|A0A6A8FED6', 'yfiB|Q9I4L6', 'GbpA|C3LW75', 'sipW|P54506', 'ChiA|P32823', 'HfsC|Q9A5L8', 'HfsA|Q9A5L6', 'SRFAD|Q08788']	6	hfs_foo_chia_ompu_sdrc_gbpa	adhesion_chitinase-production	2	2024856	Roseibacillus sp.
GCA_002689965.1	18	['HfsD|Q9A5L5', 'OmpU|P0C6Q6', 'HfsF|Q9A5M1', 'HfsH|Q9A5L9', 'HfsG|Q9A5M0', 'tpbB|A0A0H2Z7X0', 'ompA|A0A3B6XXR4', 'yfiB|Q9I4L6', 'ompW|A0A0F4PBB9', 'GbpA|C3LW75', 'pilF|A0A290TXQ9', 'sipW|P54506', 'RbmC|A0A2S1ZSI6', 'ChiA|P32823', 'HfsC|Q9A5L8', 'HfaB|P27343', 'Bap1|Q9KQW0', 'SRFAD|Q08788']	7	hfacces_chia_omp_ompu_bap1_rbmc_gbpa	adhesion_chitinase-production	2	2026783	Pseudoalteromonadaceae bacterium
GCA_900141885.1	17	['HfsD|Q9A5L5', 'OmpU|P0C6Q6', 'HfsF|Q9A5M1', 'HfsE|Q9A5M2', 'HfsH|Q9A5L9', 'HfsG|Q9A5M0', 'tpbB|A0A0H2Z7X0', 'sdrC|A0A6A8FED6', 'ompA|A0A3B6XXR4', 'yfiB|Q9I4L6', 'sipW|P54506', 'RbmC|A0A2S1ZSI6', 'ChiA|P32823', 'HfsC|Q9A5L8', 'HfsA|Q9A5L6', 'Bap1|Q9KQW0', 'SRFAD|Q08788']	6	hfs_chia_ompu_sdrc_bap1_rbmc	adhesion_chitinase-production	2	579105	Mesonia phycicola
GCA_002688175.1	15	['SRFAA|P27206', 'SRFAB|Q04747', 'HfsD|Q9A5L5', 'OmpU|P0C6Q6', 'HfsF|Q9A5M1', 'HfsG|Q9A5M0', 'HfsH|Q9A5L9', 'sdrC|A0A6A8FED6', 'yfiB|Q9I4L6', 'sipW|P54506', 'ChiA|P32823', 'HfsC|Q9A5L8', 'yfiR|Q9I4L4', 'HfsA|Q9A5L6', 'SRFAD|Q08788']	3	chia_ompu_sdrc	chitinase-production_adhesion	2	2026725	Chromatiales bacterium
GCA_005047595.1	15	['HfsD|Q9A5L5', 'OmpU|P0C6Q6', 'HfsF|Q9A5M1', 'HfsE|Q9A5M2', 'HfsH|Q9A5L9', 'HfsG|Q9A5M0', 'tpbB|A0A0H2Z7X0', 'sdrC|A0A6A8FED6', 'yfiB|Q9I4L6', 'ompW|A0A0F4PBB9', 'sipW|P54506', 'ChiA|P32823', 'HfsC|Q9A5L8', 'HfsA|Q9A5L6', 'SRFAD|Q08788']	4	hfs_chia_ompu_sdrc	adhesion_chitinase-production	2	2565367	Pontimicrobium aquaticum
GCA_005146365.1	17	['HfsD|Q9A5L5', 'OmpU|P0C6Q6', 'HfsF|Q9A5M1', 'HfsE|Q9A5M2', 'HfsH|Q9A5L9', 'HfsG|Q9A5M0', 'sdrC|A0A6A8FED6', 'ompA|A0A3B6XXR4', 'yfiB|Q9I4L6', 'GbpA|C3LW75', 'sipW|P54506', 'ChiA|P32823', 'HfsC|Q9A5L8', 'yfiR|Q9I4L4', 'HfaB|P27343', 'HfsA|Q9A5L6', 'SRFAD|Q08788']	6	hfs_hfacces_chia_ompu_sdrc_gbpa	adhesion_chitinase-production	2	188144	Enterovibrio norvegicus
GCA_000355675.1	19	['Foo1|A1X158', 'ompA|A0A3B6XXR4', 'HfaB|P27343', 'OmpU|P0C6Q6', 'tpbB|A0A0H2Z7X0', 'ompW|A0A0F4PBB9', 'HfsD|Q9A5L5', 'HfsF|Q9A5M1', 'HfsE|Q9A5M2', 'HfsH|Q9A5L9', 'HfsG|Q9A5M0', 'yfiB|Q9I4L6', 'sipW|P54506', 'ChiA|P32823', 'HfsC|Q9A5L8', 'yfiR|Q9I4L4', 'HfsA|Q9A5L6', 'sdrC|A0A6A8FED6', 'SRFAD|Q08788']	7	hfs_hfacces_foo_chia_yfi_ompu_sdrc	adhesion_chitinase-production	2	1298593	Thalassolituus oleivorans
GCA_002718115.1	17	['HfsD|Q9A5L5', 'OmpU|P0C6Q6', 'HfsF|Q9A5M1', 'HfsE|Q9A5M2', 'HfsH|Q9A5L9', 'HfsG|Q9A5M0', 'sdrC|A0A6A8FED6', 'ompA|A0A3B6XXR4', 'yfiB|Q9I4L6', 'ompW|A0A0F4PBB9', 'sipW|P54506', 'RbmC|A0A2S1ZSI6', 'ChiA|P32823', 'HfaB|P27343', 'HfsA|Q9A5L6', 'Bap1|Q9KQW0', 'SRFAD|Q08788']	6	hfacces_chia_ompu_sdrc_bap1_rbmc	adhesion_chitinase-production	2	1874361	Idiomarina sp.
GCA_001631935.1	11	['HfsD|Q9A5L5', 'HfsF|Q9A5M1', 'HfsG|Q9A5M0', 'ompA|A0A3B6XXR4', 'sipW|P54506', 'RbmC|A0A2S1ZSI6', 'ChiA|P32823', 'HfsC|Q9A5L8', 'HfsA|Q9A5L6', 'Bap1|Q9KQW0', 'SRFAD|Q08788']	3	chia_bap1_rbmc	chitinase-production_adhesion	2	1801630	Synechococcus sp. MIT S9509
GCA_002695485.1	17	['SRFAA|P27206', 'SRFAB|Q04747', 'HfsD|Q9A5L5', 'OmpU|P0C6Q6', 'HfsF|Q9A5M1', 'HfsE|Q9A5M2', 'HfsG|Q9A5M0', 'HfsH|Q9A5L9', 'tpbB|A0A0H2Z7X0', 'SRFAC|Q08787', 'yfiB|Q9I4L6', 'ompW|A0A0F4PBB9', 'RbmC|A0A2S1ZSI6', 'HfsC|Q9A5L8', 'HfsA|Q9A5L6', 'Bap1|Q9KQW0', 'SRFAD|Q08788']	5	srf_hfs_ompu_bap1_rbmc	drag-reducing_adhesion	2	1912891	Sphingobium sp.
GCA_002701745.1	9	['HfsG|Q9A5M0', 'sdrC|A0A6A8FED6', 'yfiB|Q9I4L6', 'ompW|A0A0F4PBB9', 'sipW|P54506', 'RbmC|A0A2S1ZSI6', 'ChiA|P32823', 'Bap1|Q9KQW0', 'SRFAD|Q08788']	4	chia_sdrc_bap1_rbmc	chitinase-production_adhesion	2	2026740	Flammeovirgaceae bacterium
GCA_002729795.1	19	['Foo1|A1X158', 'ompA|A0A3B6XXR4', 'OmpU|P0C6Q6', 'tpbB|A0A0H2Z7X0', 'ompW|A0A0F4PBB9', 'pilF|A0A290TXQ9', 'HfsD|Q9A5L5', 'HfsF|Q9A5M1', 'HfsE|Q9A5M2', 'HfsH|Q9A5L9', 'HfsG|Q9A5M0', 'yfiB|Q9I4L6', 'sipW|P54506', 'ChiA|P32823', 'HfsC|Q9A5L8', 'HfsA|Q9A5L6', 'sdrC|A0A6A8FED6', 'GbpA|C3LW75', 'SRFAD|Q08788']	7	hfs_foo_chia_omp_ompu_sdrc_gbpa	adhesion_chitinase-production	2	1916082	Alteromonadaceae bacterium
GCA_003584015.1	15	['SRFAA|P27206', 'SRFAB|Q04747', 'HfsD|Q9A5L5', 'OmpU|P0C6Q6', 'HfsF|Q9A5M1', 'HfsE|Q9A5M2', 'HfsG|Q9A5M0', 'HfsH|Q9A5L9', 'SRFAC|Q08787', 'yfiB|Q9I4L6', 'ompW|A0A0F4PBB9', 'sipW|P54506', 'HfsC|Q9A5L8', 'HfsA|Q9A5L6', 'SRFAD|Q08788']	3	srf_hfs_ompu	drag-reducing_adhesion	2	1784712	Aurantiacibacter xanthus
GCA_002715155.1	13	['HfsD|Q9A5L5', 'OmpU|P0C6Q6', 'HfsG|Q9A5M0', 'HfsE|Q9A5M2', 'HfsH|Q9A5L9', 'tpbB|A0A0H2Z7X0', 'yfiB|Q9I4L6', 'sipW|P54506', 'ChiA|P32823', 'HfsC|Q9A5L8', 'HfaB|P27343', 'HfsA|Q9A5L6', 'SRFAD|Q08788']	3	hfacces_chia_ompu	adhesion_chitinase-production	2	1872390	Aequorivita sp.
GCA_002874375.1	17	['HfsD|Q9A5L5', 'OmpU|P0C6Q6', 'HfsF|Q9A5M1', 'HfsE|Q9A5M2', 'HfsH|Q9A5L9', 'HfsG|Q9A5M0', 'sdrC|A0A6A8FED6', 'ompA|A0A3B6XXR4', 'yfiB|Q9I4L6', 'GbpA|C3LW75', 'sipW|P54506', 'ChiA|P32823', 'HfsC|Q9A5L8', 'yfiR|Q9I4L4', 'HfaB|P27343', 'HfsA|Q9A5L6', 'SRFAD|Q08788']	6	hfs_hfacces_chia_ompu_sdrc_gbpa	adhesion_chitinase-production	2	188144	Enterovibrio norvegicus
GCA_002698675.1	17	['HfsD|Q9A5L5', 'Foo1|A1X158', 'HfsG|Q9A5M0', 'HfsE|Q9A5M2', 'HfsH|Q9A5L9', 'OmpU|P0C6Q6', 'tpbB|A0A0H2Z7X0', 'sdrC|A0A6A8FED6', 'yfiB|Q9I4L6', 'ompW|A0A0F4PBB9', 'sipW|P54506', 'RbmC|A0A2S1ZSI6', 'ChiA|P32823', 'HfsC|Q9A5L8', 'HfsA|Q9A5L6', 'Bap1|Q9KQW0', 'SRFAD|Q08788']	6	foo_chia_ompu_sdrc_bap1_rbmc	adhesion_chitinase-production	2	1899355	Oceanospirillaceae bacterium
GCA_002683275.1	11	['HfsD|Q9A5L5', 'HfsG|Q9A5M0', 'HfsH|Q9A5L9', 'sdrC|A0A6A8FED6', 'ompA|A0A3B6XXR4', 'yfiB|Q9I4L6', 'GbpA|C3LW75', 'sipW|P54506', 'ChiA|P32823', 'HfsC|Q9A5L8', 'HfaB|P27343']	4	hfacces_chia_sdrc_gbpa	adhesion_chitinase-production	2	2026778	Phycisphaerae bacterium
GCA_002720945.1	15	['HfsD|Q9A5L5', 'Foo1|A1X158', 'HfsF|Q9A5M1', 'HfsE|Q9A5M2', 'HfsH|Q9A5L9', 'HfsG|Q9A5M0', 'OmpU|P0C6Q6', 'sdrC|A0A6A8FED6', 'ompA|A0A3B6XXR4', 'yfiB|Q9I4L6', 'sipW|P54506', 'ChiA|P32823', 'HfsC|Q9A5L8', 'HfsA|Q9A5L6', 'SRFAD|Q08788']	5	hfs_foo_chia_ompu_sdrc	adhesion_chitinase-production	2	2024858	Sandaracinus sp.
GCA_002720745.1	11	['HfsD|Q9A5L5', 'HfsF|Q9A5M1', 'HfsE|Q9A5M2', 'HfsG|Q9A5M0', 'tpbB|A0A0H2Z7X0', 'sdrC|A0A6A8FED6', 'yfiB|Q9I4L6', 'sipW|P54506', 'ChiA|P32823', 'HfsC|Q9A5L8', 'HfsA|Q9A5L6']	2	chia_sdrc	chitinase-production_adhesion	2	2024824	Balneola sp.
GCA_001304175.1	10	['HfsF|Q9A5M1', 'HfsE|Q9A5M2', 'HfsH|Q9A5L9', 'HfsG|Q9A5M0', 'sdrC|A0A6A8FED6', 'sipW|P54506', 'ChiA|P32823', 'HfsC|Q9A5L8', 'HfsA|Q9A5L6', 'SRFAD|Q08788']	2	chia_sdrc	chitinase-production_adhesion	2	1703388	Anaerolineae bacterium SM23_84
GCA_002693945.1	16	['HfsD|Q9A5L5', 'OmpU|P0C6Q6', 'HfsF|Q9A5M1', 'HfsE|Q9A5M2', 'HfsH|Q9A5L9', 'HfsG|Q9A5M0', 'tpbB|A0A0H2Z7X0', 'sdrC|A0A6A8FED6', 'yfiB|Q9I4L6', 'sipW|P54506', 'RbmC|A0A2S1ZSI6', 'ChiA|P32823', 'HfsC|Q9A5L8', 'HfsA|Q9A5L6', 'Bap1|Q9KQW0', 'SRFAD|Q08788']	6	hfs_chia_ompu_sdrc_bap1_rbmc	adhesion_chitinase-production	2	2024845	Oleibacter sp.
GCA_002876335.1	17	['HfsD|Q9A5L5', 'OmpU|P0C6Q6', 'HfsG|Q9A5M0', 'HfsE|Q9A5M2', 'ompA|A0A3B6XXR4', 'tpbB|A0A0H2Z7X0', 'yfiB|Q9I4L6', 'ompW|A0A0F4PBB9', 'GbpA|C3LW75', 'sipW|P54506', 'RbmC|A0A2S1ZSI6', 'ChiA|P32823', 'HfsC|Q9A5L8', 'HfaB|P27343', 'HfsA|Q9A5L6', 'Bap1|Q9KQW0', 'SRFAD|Q08788']	6	hfacces_chia_ompu_bap1_rbmc_gbpa	adhesion_chitinase-production	2	212663	Vibrio tasmaniensis
GCA_004145845.1	9	['HfsD|Q9A5L5', 'OmpU|P0C6Q6', 'HfsF|Q9A5M1', 'HfsH|Q9A5L9', 'HfsG|Q9A5M0', 'yfiB|Q9I4L6', 'sipW|P54506', 'ChiA|P32823', 'SRFAD|Q08788']	2	chia_ompu	chitinase-production_adhesion	2	2510646	Loktanella sp. IMCC34160
GCA_900156145.1	13	['HfsD|Q9A5L5', 'HfsF|Q9A5M1', 'HfsE|Q9A5M2', 'HfsH|Q9A5L9', 'HfsG|Q9A5M0', 'tpbB|A0A0H2Z7X0', 'sdrC|A0A6A8FED6', 'yfiB|Q9I4L6', 'sipW|P54506', 'ChiA|P32823', 'HfsC|Q9A5L8', 'HfsA|Q9A5L6', 'SRFAD|Q08788']	3	hfs_chia_sdrc	adhesion_chitinase-production	2	254	Chryseobacterium indoltheticum
GCA_002732025.1	9	['HfsD|Q9A5L5', 'Foo1|A1X158', 'HfsF|Q9A5M1', 'HfsH|Q9A5L9', 'HfsG|Q9A5M0', 'pilF|A0A290TXQ9', 'sipW|P54506', 'ChiA|P32823', 'SRFAD|Q08788']	2	foo_chia	adhesion_chitinase-production	2	2026734	Dehalococcoidia bacterium
GCA_002713555.1	12	['SRFAA|P27206', 'SRFAB|Q04747', 'HfsD|Q9A5L5', 'HfsF|Q9A5M1', 'HfsG|Q9A5M0', 'sdrC|A0A6A8FED6', 'yfiB|Q9I4L6', 'sipW|P54506', 'ChiA|P32823', 'HfsC|Q9A5L8', 'HfsA|Q9A5L6', 'SRFAD|Q08788']	2	chia_sdrc	chitinase-production_adhesion	2	2026779	Planctomycetaceae bacterium
GCA_002706545.1	16	['SRFAA|P27206', 'SRFAB|Q04747', 'HfsD|Q9A5L5', 'OmpU|P0C6Q6', 'HfsG|Q9A5M0', 'HfsH|Q9A5L9', 'sdrC|A0A6A8FED6', 'yfiB|Q9I4L6', 'ompW|A0A0F4PBB9', 'sipW|P54506', 'RbmC|A0A2S1ZSI6', 'ChiA|P32823', 'HfsC|Q9A5L8', 'HfsA|Q9A5L6', 'Bap1|Q9KQW0', 'SRFAD|Q08788']	5	chia_ompu_sdrc_bap1_rbmc	chitinase-production_adhesion	2	1899355	Oceanospirillaceae bacterium
GCA_011044175.1	17	['HfsD|Q9A5L5', 'HfsF|Q9A5M1', 'HfsE|Q9A5M2', 'HfsH|Q9A5L9', 'HfsG|Q9A5M0', 'tpbB|A0A0H2Z7X0', 'sdrC|A0A6A8FED6', 'ompA|A0A3B6XXR4', 'yfiB|Q9I4L6', 'sipW|P54506', 'RbmC|A0A2S1ZSI6', 'ChiA|P32823', 'HfsC|Q9A5L8', 'HfaB|P27343', 'HfsA|Q9A5L6', 'Bap1|Q9KQW0', 'SRFAD|Q08788']	6	hfs_hfacces_chia_sdrc_bap1_rbmc	adhesion_chitinase-production	2	2744027	Rasiella rasia
GCA_004551525.1	20	['SRFAB|Q04747', 'ompA|A0A3B6XXR4', 'HfaB|P27343', 'SRFAA|P27206', 'OmpU|P0C6Q6', 'tpbB|A0A0H2Z7X0', 'ompW|A0A0F4PBB9', 'HfsD|Q9A5L5', 'HfsF|Q9A5M1', 'HfsE|Q9A5M2', 'HfsG|Q9A5M0', 'HfsH|Q9A5L9', 'yfiB|Q9I4L6', 'sipW|P54506', 'ChiA|P32823', 'HfsC|Q9A5L8', 'yfiR|Q9I4L4', 'HfsA|Q9A5L6', 'GbpA|C3LW75', 'SRFAD|Q08788']	6	hfs_hfacces_chia_yfi_ompu_gbpa	adhesion_chitinase-production	2	2499078	Vibrio ouci
GCA_002700245.1	9	['HfsF|Q9A5M1', 'HfsE|Q9A5M2', 'HfsH|Q9A5L9', 'HfsG|Q9A5M0', 'sdrC|A0A6A8FED6', 'yfiB|Q9I4L6', 'sipW|P54506', 'ChiA|P32823', 'HfsC|Q9A5L8']	2	chia_sdrc	chitinase-production_adhesion	2	2026801	Verrucomicrobiales bacterium
GCA_005930815.1	19	['Foo1|A1X158', 'ompA|A0A3B6XXR4', 'HfaB|P27343', 'OmpU|P0C6Q6', 'tpbB|A0A0H2Z7X0', 'ompW|A0A0F4PBB9', 'pilF|A0A290TXQ9', 'HfsD|Q9A5L5', 'HfsG|Q9A5M0', 'HfsE|Q9A5M2', 'HfsH|Q9A5L9', 'yfiB|Q9I4L6', 'sipW|P54506', 'ChiA|P32823', 'HfsC|Q9A5L8', 'yfiR|Q9I4L4', 'HfsA|Q9A5L6', 'GbpA|C3LW75', 'SRFAD|Q08788']	7	hfacces_foo_chia_omp_yfi_ompu_gbpa	adhesion_chitinase-production	2	579570	Pseudoalteromonas sp. S979
GCA_002689825.1	17	['HfsD|Q9A5L5', 'OmpU|P0C6Q6', 'HfsF|Q9A5M1', 'HfsE|Q9A5M2', 'HfsH|Q9A5L9', 'HfsG|Q9A5M0', 'tpbB|A0A0H2Z7X0', 'sdrC|A0A6A8FED6', 'ompA|A0A3B6XXR4', 'yfiB|Q9I4L6', 'ompW|A0A0F4PBB9', 'sipW|P54506', 'ChiA|P32823', 'HfsC|Q9A5L8', 'HfaB|P27343', 'HfsA|Q9A5L6', 'SRFAD|Q08788']	5	hfs_hfacces_chia_ompu_sdrc	adhesion_chitinase-production	2	2020902	Ponticaulis sp.
GCA_001941605.1	12	['HfsD|Q9A5L5', 'Foo1|A1X158', 'HfsG|Q9A5M0', 'bslB|P39632', 'sdrC|A0A6A8FED6', 'tpbB|A0A0H2Z7X0', 'ompA|A0A3B6XXR4', 'yfiB|Q9I4L6', 'sipW|P54506', 'HfsC|Q9A5L8', 'HfsA|Q9A5L6', 'bslA|P71014']	3	bsl_foo_sdrc	drag-reducing_adhesion	2	979	Cellulophaga lytica
GCA_002693185.1	15	['HfsD|Q9A5L5', 'Foo1|A1X158', 'HfsF|Q9A5M1', 'HfsE|Q9A5M2', 'HfsH|Q9A5L9', 'HfsG|Q9A5M0', 'tpbB|A0A0H2Z7X0', 'sdrC|A0A6A8FED6', 'ompA|A0A3B6XXR4', 'yfiB|Q9I4L6', 'ChiA|P32823', 'HfsC|Q9A5L8', 'HfaB|P27343', 'HfsA|Q9A5L6', 'SRFAD|Q08788']	5	hfs_hfacces_foo_chia_sdrc	adhesion_chitinase-production	2	1931228	Gramella sp.
GCA_002691505.1	10	['HfsD|Q9A5L5', 'HfsG|Q9A5M0', 'HfsE|Q9A5M2', 'HfsH|Q9A5L9', 'sdrC|A0A6A8FED6', 'yfiB|Q9I4L6', 'sipW|P54506', 'ChiA|P32823', 'HfsC|Q9A5L8', 'HfsA|Q9A5L6']	2	chia_sdrc	chitinase-production_adhesion	2	2026801	Verrucomicrobiales bacterium
GCA_001294685.1	16	['HfsD|Q9A5L5', 'OmpU|P0C6Q6', 'HfsF|Q9A5M1', 'HfsH|Q9A5L9', 'HfsG|Q9A5M0', 'sdrC|A0A6A8FED6', 'ompA|A0A3B6XXR4', 'yfiB|Q9I4L6', 'ompW|A0A0F4PBB9', 'sipW|P54506', 'RbmC|A0A2S1ZSI6', 'ChiA|P32823', 'HfaB|P27343', 'HfsA|Q9A5L6', 'Bap1|Q9KQW0', 'SRFAD|Q08788']	6	hfacces_chia_ompu_sdrc_bap1_rbmc	adhesion_chitinase-production	2	86102	Idiomarina abyssalis
GCA_002723415.1	10	['HfsD|Q9A5L5', 'Foo1|A1X158', 'HfsF|Q9A5M1', 'HfsH|Q9A5L9', 'HfsG|Q9A5M0', 'tpbB|A0A0H2Z7X0', 'sipW|P54506', 'ChiA|P32823', 'HfsC|Q9A5L8', 'pilF|A0A290TXQ9']	2	foo_chia	adhesion_chitinase-production	2	2026724	Chloroflexi bacterium
GCA_002716585.1	12	['HfsD|Q9A5L5', 'Foo1|A1X158', 'HfsF|Q9A5M1', 'HfsH|Q9A5L9', 'HfsG|Q9A5M0', 'sdrC|A0A6A8FED6', 'yfiB|Q9I4L6', 'sipW|P54506', 'ChiA|P32823', 'HfsC|Q9A5L8', 'HfsA|Q9A5L6', 'SRFAD|Q08788']	3	foo_chia_sdrc	adhesion_chitinase-production	2	2026763	Myxococcales bacterium
GCA_001304275.1	16	['HfsD|Q9A5L5', 'Foo1|A1X158', 'HfsF|Q9A5M1', 'HfsE|Q9A5M2', 'HfsH|Q9A5L9', 'HfsG|Q9A5M0', 'tpbB|A0A0H2Z7X0', 'sdrC|A0A6A8FED6', 'ompA|A0A3B6XXR4', 'yfiB|Q9I4L6', 'sipW|P54506', 'RbmC|A0A2S1ZSI6', 'ChiA|P32823', 'HfsC|Q9A5L8', 'HfsA|Q9A5L6', 'Bap1|Q9KQW0']	6	hfs_foo_chia_sdrc_bap1_rbmc	adhesion_chitinase-production	2	1703410	Phycisphaerae bacterium SM1_79
GCA_014164345.1	19	['Foo1|A1X158', 'ompA|A0A3B6XXR4', 'HfaB|P27343', 'OmpU|P0C6Q6', 'tpbB|A0A0H2Z7X0', 'ompW|A0A0F4PBB9', 'HfsD|Q9A5L5', 'HfsF|Q9A5M1', 'HfsE|Q9A5M2', 'HfsH|Q9A5L9', 'HfsG|Q9A5M0', 'yfiB|Q9I4L6', 'sipW|P54506', 'ChiA|P32823', 'HfsC|Q9A5L8', 'yfiR|Q9I4L4', 'HfsA|Q9A5L6', 'GbpA|C3LW75', 'SRFAD|Q08788']	7	hfs_hfacces_foo_chia_yfi_ompu_gbpa	adhesion_chitinase-production	2	2760968	Pseudoalteromonas sp. SG43-5
GCA_002700325.1	16	['SRFAA|P27206', 'SRFAB|Q04747', 'HfsD|Q9A5L5', 'OmpU|P0C6Q6', 'HfsF|Q9A5M1', 'HfsG|Q9A5M0', 'HfsH|Q9A5L9', 'SRFAC|Q08787', 'yfiB|Q9I4L6', 'ompW|A0A0F4PBB9', 'sipW|P54506', 'RbmC|A0A2S1ZSI6', 'HfsC|Q9A5L8', 'HfsA|Q9A5L6', 'Bap1|Q9KQW0', 'SRFAD|Q08788']	4	srf_ompu_bap1_rbmc	drag-reducing_adhesion	2	2024862	Yangia sp.
GCA_002721995.1	10	['HfsD|Q9A5L5', 'Foo1|A1X158', 'HfsG|Q9A5M0', 'HfsH|Q9A5L9', 'tpbB|A0A0H2Z7X0', 'pilF|A0A290TXQ9', 'sipW|P54506', 'ChiA|P32823', 'HfsC|Q9A5L8', 'SRFAD|Q08788']	2	foo_chia	adhesion_chitinase-production	2	2026724	Chloroflexi bacterium
GCA_001975705.1	13	['HfsD|Q9A5L5', 'Foo1|A1X158', 'HfsF|Q9A5M1', 'HfsH|Q9A5L9', 'HfsG|Q9A5M0', 'OmpU|P0C6Q6', 'yfiB|Q9I4L6', 'ompW|A0A0F4PBB9', 'sipW|P54506', 'ChiA|P32823', 'HfsC|Q9A5L8', 'HfsA|Q9A5L6', 'SRFAD|Q08788']	3	foo_chia_ompu	adhesion_chitinase-production	2	1250539	Salipiger abyssi
GCA_021764745.1	13	['HfsD|Q9A5L5', 'HfsG|Q9A5M0', 'HfsH|Q9A5L9', 'sdrC|A0A6A8FED6', 'tpbB|A0A0H2Z7X0', 'yfiB|Q9I4L6', 'ompW|A0A0F4PBB9', 'sipW|P54506', 'ChiA|P32823', 'HfsC|Q9A5L8', 'HfaB|P27343', 'HfsA|Q9A5L6', 'SRFAD|Q08788']	3	hfacces_chia_sdrc	adhesion_chitinase-production	2	679257	Joostella atrarenae
GCA_002240205.1	12	['HfsD|Q9A5L5', 'OmpU|P0C6Q6', 'HfsF|Q9A5M1', 'HfsH|Q9A5L9', 'HfsG|Q9A5M0', 'sdrC|A0A6A8FED6', 'yfiB|Q9I4L6', 'sipW|P54506', 'ChiA|P32823', 'HfsC|Q9A5L8', 'HfsA|Q9A5L6', 'SRFAD|Q08788']	3	chia_ompu_sdrc	chitinase-production_adhesion	2	281093	Prosthecochloris sp. GSB1
GCA_002706025.1	15	['HfsD|Q9A5L5', 'OmpU|P0C6Q6', 'HfsG|Q9A5M0', 'HfsE|Q9A5M2', 'HfsH|Q9A5L9', 'sdrC|A0A6A8FED6', 'yfiB|Q9I4L6', 'ompW|A0A0F4PBB9', 'sipW|P54506', 'RbmC|A0A2S1ZSI6', 'ChiA|P32823', 'HfsC|Q9A5L8', 'HfsA|Q9A5L6', 'Bap1|Q9KQW0', 'SRFAD|Q08788']	5	chia_ompu_sdrc_bap1_rbmc	chitinase-production_adhesion	2	1899355	Oceanospirillaceae bacterium
GCA_002714805.1	15	['HfsD|Q9A5L5', 'HfsF|Q9A5M1', 'HfsE|Q9A5M2', 'HfsH|Q9A5L9', 'HfsG|Q9A5M0', 'sdrC|A0A6A8FED6', 'yfiB|Q9I4L6', 'sipW|P54506', 'RbmC|A0A2S1ZSI6', 'ChiA|P32823', 'HfsC|Q9A5L8', 'HfaB|P27343', 'HfsA|Q9A5L6', 'Bap1|Q9KQW0', 'SRFAD|Q08788']	6	hfs_hfacces_chia_sdrc_bap1_rbmc	adhesion_chitinase-production	2	2021391	Flavobacteriales bacterium
GCA_002686265.1	14	['HfsD|Q9A5L5', 'Foo1|A1X158', 'HfsF|Q9A5M1', 'HfsE|Q9A5M2', 'HfsH|Q9A5L9', 'HfsG|Q9A5M0', 'OmpU|P0C6Q6', 'sdrC|A0A6A8FED6', 'yfiB|Q9I4L6', 'sipW|P54506', 'ChiA|P32823', 'HfsC|Q9A5L8', 'HfsA|Q9A5L6', 'SRFAD|Q08788']	5	hfs_foo_chia_ompu_sdrc	adhesion_chitinase-production	2	2026780	Planctomycetota bacterium
GCA_002707155.1	15	['HfsD|Q9A5L5', 'OmpU|P0C6Q6', 'HfsF|Q9A5M1', 'HfsE|Q9A5M2', 'HfsH|Q9A5L9', 'HfsG|Q9A5M0', 'tpbB|A0A0H2Z7X0', 'sdrC|A0A6A8FED6', 'yfiB|Q9I4L6', 'sipW|P54506', 'ChiA|P32823', 'HfsC|Q9A5L8', 'HfaB|P27343', 'HfsA|Q9A5L6', 'SRFAD|Q08788']	5	hfs_hfacces_chia_ompu_sdrc	adhesion_chitinase-production	2	2026728	Crocinitomicaceae bacterium
GCA_002709005.1	13	['HfsD|Q9A5L5', 'HfsF|Q9A5M1', 'HfsE|Q9A5M2', 'HfsH|Q9A5L9', 'HfsG|Q9A5M0', 'sdrC|A0A6A8FED6', 'yfiB|Q9I4L6', 'ompW|A0A0F4PBB9', 'sipW|P54506', 'ChiA|P32823', 'HfsC|Q9A5L8', 'HfsA|Q9A5L6', 'SRFAD|Q08788']	3	hfs_chia_sdrc	adhesion_chitinase-production	2	1909294	Hyphomicrobiales bacterium
GCA_002702495.1	14	['SRFAA|P27206', 'SRFAB|Q04747', 'HfsD|Q9A5L5', 'HfsF|Q9A5M1', 'HfsE|Q9A5M2', 'HfsG|Q9A5M0', 'HfsH|Q9A5L9', 'sdrC|A0A6A8FED6', 'SRFAC|Q08787', 'yfiB|Q9I4L6', 'sipW|P54506', 'ChiA|P32823', 'HfsC|Q9A5L8', 'HfsA|Q9A5L6']	3	hfs_chia_sdrc	adhesion_chitinase-production	2	2026801	Verrucomicrobiales bacterium
GCA_014164115.1	19	['Foo1|A1X158', 'ompA|A0A3B6XXR4', 'HfaB|P27343', 'OmpU|P0C6Q6', 'tpbB|A0A0H2Z7X0', 'ompW|A0A0F4PBB9', 'HfsD|Q9A5L5', 'HfsF|Q9A5M1', 'HfsE|Q9A5M2', 'HfsH|Q9A5L9', 'HfsG|Q9A5M0', 'yfiB|Q9I4L6', 'sipW|P54506', 'ChiA|P32823', 'HfsC|Q9A5L8', 'yfiR|Q9I4L4', 'HfsA|Q9A5L6', 'GbpA|C3LW75', 'SRFAD|Q08788']	7	hfs_hfacces_foo_chia_yfi_ompu_gbpa	adhesion_chitinase-production	2	2760956	Pseudoalteromonas sp. SG45-2
GCA_002691045.1	13	['HfsD|Q9A5L5', 'HfsF|Q9A5M1', 'HfsE|Q9A5M2', 'HfsG|Q9A5M0', 'tpbB|A0A0H2Z7X0', 'ompA|A0A3B6XXR4', 'yfiB|Q9I4L6', 'sipW|P54506', 'RbmC|A0A2S1ZSI6', 'ChiA|P32823', 'HfaB|P27343', 'Bap1|Q9KQW0', 'SRFAD|Q08788']	4	hfacces_chia_bap1_rbmc	adhesion_chitinase-production	2	2024839	Marinovum sp.
GCA_002688255.1	15	['HfsD|Q9A5L5', 'HfsF|Q9A5M1', 'HfsE|Q9A5M2', 'HfsH|Q9A5L9', 'HfsG|Q9A5M0', 'tpbB|A0A0H2Z7X0', 'sdrC|A0A6A8FED6', 'ompA|A0A3B6XXR4', 'yfiB|Q9I4L6', 'sipW|P54506', 'ChiA|P32823', 'HfsC|Q9A5L8', 'HfaB|P27343', 'HfsA|Q9A5L6', 'SRFAD|Q08788']	4	hfs_hfacces_chia_sdrc	adhesion_chitinase-production	2	2026735	Deltaproteobacteria bacterium
GCA_002694035.1	14	['HfsD|Q9A5L5', 'OmpU|P0C6Q6', 'HfsF|Q9A5M1', 'HfsE|Q9A5M2', 'HfsG|Q9A5M0', 'tpbB|A0A0H2Z7X0', 'sdrC|A0A6A8FED6', 'yfiB|Q9I4L6', 'sipW|P54506', 'ChiA|P32823', 'HfsC|Q9A5L8', 'yfiR|Q9I4L4', 'HfaB|P27343', 'SRFAD|Q08788']	5	hfacces_chia_yfi_ompu_sdrc	adhesion_chitinase-production	2	2026771	Opitutae bacterium
GCA_001690925.1	16	['HfsD|Q9A5L5', 'OmpU|P0C6Q6', 'HfsG|Q9A5M0', 'HfsE|Q9A5M2', 'HfsH|Q9A5L9', 'tpbB|A0A0H2Z7X0', 'ompA|A0A3B6XXR4', 'yfiB|Q9I4L6', 'GbpA|C3LW75', 'sipW|P54506', 'ChiA|P32823', 'HfsC|Q9A5L8', 'yfiR|Q9I4L4', 'HfaB|P27343', 'HfsA|Q9A5L6', 'SRFAD|Q08788']	5	hfacces_chia_yfi_ompu_gbpa	adhesion_chitinase-production	2	668	Aliivibrio fischeri
GCA_002731825.1	15	['HfsD|Q9A5L5', 'Foo1|A1X158', 'HfsF|Q9A5M1', 'HfsE|Q9A5M2', 'HfsH|Q9A5L9', 'HfsG|Q9A5M0', 'OmpU|P0C6Q6', 'sdrC|A0A6A8FED6', 'ompA|A0A3B6XXR4', 'yfiB|Q9I4L6', 'sipW|P54506', 'ChiA|P32823', 'HfsC|Q9A5L8', 'HfsA|Q9A5L6', 'SRFAD|Q08788']	5	hfs_foo_chia_ompu_sdrc	adhesion_chitinase-production	2	2026763	Myxococcales bacterium
GCA_000184325.1	16	['HfsD|Q9A5L5', 'OmpU|P0C6Q6', 'HfsF|Q9A5M1', 'HfsH|Q9A5L9', 'HfsG|Q9A5M0', 'tpbB|A0A0H2Z7X0', 'ompA|A0A3B6XXR4', 'yfiB|Q9I4L6', 'ompW|A0A0F4PBB9', 'GbpA|C3LW75', 'sipW|P54506', 'ChiA|P32823', 'HfsC|Q9A5L8', 'HfaB|P27343', 'HfsA|Q9A5L6', 'SRFAD|Q08788']	4	hfacces_chia_ompu_gbpa	adhesion_chitinase-production	2	903510	Vibrio furnissii
GCA_900142245.1	17	['SRFAA|P27206', 'SRFAB|Q04747', 'HfsD|Q9A5L5', 'HfsF|Q9A5M1', 'HfsG|Q9A5M0', 'HfsH|Q9A5L9', 'tpbB|A0A0H2Z7X0', 'sdrC|A0A6A8FED6', 'ompA|A0A3B6XXR4', 'yfiB|Q9I4L6', 'sipW|P54506', 'RbmC|A0A2S1ZSI6', 'ChiA|P32823', 'HfsC|Q9A5L8', 'HfsA|Q9A5L6', 'Bap1|Q9KQW0', 'SRFAD|Q08788']	4	chia_sdrc_bap1_rbmc	chitinase-production_adhesion	2	1121301	Paramaledivibacter caminithermalis
GCA_000024125.1	14	['HfsD|Q9A5L5', 'Foo1|A1X158', 'HfsF|Q9A5M1', 'HfsE|Q9A5M2', 'HfsG|Q9A5M0', 'tpbB|A0A0H2Z7X0', 'sdrC|A0A6A8FED6', 'ompA|A0A3B6XXR4', 'yfiB|Q9I4L6', 'sipW|P54506', 'ChiA|P32823', 'HfsC|Q9A5L8', 'HfsA|Q9A5L6', 'SRFAD|Q08788']	3	foo_chia_sdrc	adhesion_chitinase-production	2	313596	Robiginitalea biformata
GCA_900128995.1	10	['HfsD|Q9A5L5', 'OmpU|P0C6Q6', 'HfsG|Q9A5M0', 'HfsH|Q9A5L9', 'yfiB|Q9I4L6', 'sipW|P54506', 'ChiA|P32823', 'HfsC|Q9A5L8', 'HfsA|Q9A5L6', 'SRFAD|Q08788']	2	chia_ompu	chitinase-production_adhesion	2	366533	Loktanella atrilutea
GCA_005146345.1	17	['HfsD|Q9A5L5', 'OmpU|P0C6Q6', 'HfsF|Q9A5M1', 'HfsE|Q9A5M2', 'HfsH|Q9A5L9', 'HfsG|Q9A5M0', 'sdrC|A0A6A8FED6', 'ompA|A0A3B6XXR4', 'yfiB|Q9I4L6', 'GbpA|C3LW75', 'sipW|P54506', 'ChiA|P32823', 'HfsC|Q9A5L8', 'yfiR|Q9I4L4', 'HfaB|P27343', 'HfsA|Q9A5L6', 'SRFAD|Q08788']	6	hfs_hfacces_chia_ompu_sdrc_gbpa	adhesion_chitinase-production	2	188144	Enterovibrio norvegicus
GCA_002686225.1	20	['Foo1|A1X158', 'ompA|A0A3B6XXR4', 'HfaB|P27343', 'OmpU|P0C6Q6', 'tpbB|A0A0H2Z7X0', 'ompW|A0A0F4PBB9', 'RbmC|A0A2S1ZSI6', 'Bap1|Q9KQW0', 'pilF|A0A290TXQ9', 'HfsD|Q9A5L5', 'HfsG|Q9A5M0', 'HfsE|Q9A5M2', 'HfsH|Q9A5L9', 'yfiB|Q9I4L6', 'sipW|P54506', 'ChiA|P32823', 'HfsC|Q9A5L8', 'HfsA|Q9A5L6', 'sdrC|A0A6A8FED6', 'SRFAD|Q08788']	8	hfacces_foo_chia_omp_ompu_sdrc_bap1_rbmc	adhesion_chitinase-production	2	232	Alteromonas sp.
GCA_006383075.2	16	['SRFAA|P27206', 'SRFAB|Q04747', 'HfsD|Q9A5L5', 'OmpU|P0C6Q6', 'HfsF|Q9A5M1', 'HfsE|Q9A5M2', 'HfsG|Q9A5M0', 'HfsH|Q9A5L9', 'sdrC|A0A6A8FED6', 'ompA|A0A3B6XXR4', 'yfiB|Q9I4L6', 'ompW|A0A0F4PBB9', 'sipW|P54506', 'ChiA|P32823', 'HfsC|Q9A5L8', 'SRFAD|Q08788']	3	chia_ompu_sdrc	chitinase-production_adhesion	2	2530203	Kordia sp. TARA_039_SRF
GCA_002715125.1	14	['HfsD|Q9A5L5', 'OmpU|P0C6Q6', 'HfsF|Q9A5M1', 'HfsE|Q9A5M2', 'HfsH|Q9A5L9', 'HfsG|Q9A5M0', 'ompA|A0A3B6XXR4', 'yfiB|Q9I4L6', 'ompW|A0A0F4PBB9', 'sipW|P54506', 'ChiA|P32823', 'HfaB|P27343', 'HfsA|Q9A5L6', 'SRFAD|Q08788']	3	hfacces_chia_ompu	adhesion_chitinase-production	2	1898113	Idiomarinaceae bacterium
GCA_002725695.1	11	['HfsD|Q9A5L5', 'HfsF|Q9A5M1', 'HfsE|Q9A5M2', 'HfsH|Q9A5L9', 'HfsG|Q9A5M0', 'tpbB|A0A0H2Z7X0', 'sdrC|A0A6A8FED6', 'ompA|A0A3B6XXR4', 'yfiB|Q9I4L6', 'ChiA|P32823', 'HfaB|P27343']	3	hfacces_chia_sdrc	adhesion_chitinase-production	2	2026760	Candidatus Marinimicrobia bacterium
GCA_012395815.1	14	['SRFAA|P27206', 'SRFAB|Q04747', 'HfsD|Q9A5L5', 'Foo1|A1X158', 'HfsG|Q9A5M0', 'HfsE|Q9A5M2', 'HfsH|Q9A5L9', 'OmpU|P0C6Q6', 'sdrC|A0A6A8FED6', 'SRFAC|Q08787', 'yfiB|Q9I4L6', 'sipW|P54506', 'HfsC|Q9A5L8', 'SRFAD|Q08788']	4	srf_foo_ompu_sdrc	drag-reducing_adhesion	2	2650661	Roseibacterium persicicum
GCA_004803465.1	16	['SRFAA|P27206', 'SRFAB|Q04747', 'HfsD|Q9A5L5', 'HfsF|Q9A5M1', 'HfsE|Q9A5M2', 'HfsG|Q9A5M0', 'HfsH|Q9A5L9', 'tpbB|A0A0H2Z7X0', 'sdrC|A0A6A8FED6', 'ompA|A0A3B6XXR4', 'yfiB|Q9I4L6', 'sipW|P54506', 'ChiA|P32823', 'HfsC|Q9A5L8', 'HfsA|Q9A5L6', 'SRFAD|Q08788']	3	hfs_chia_sdrc	adhesion_chitinase-production	2	2562452	Lewinella litorea
GCA_007004065.1	11	['HfsD|Q9A5L5', 'Foo1|A1X158', 'HfsG|Q9A5M0', 'HfsE|Q9A5M2', 'HfsH|Q9A5L9', 'OmpU|P0C6Q6', 'tpbB|A0A0H2Z7X0', 'yfiB|Q9I4L6', 'sipW|P54506', 'ChiA|P32823', 'SRFAD|Q08788']	3	foo_chia_ompu	adhesion_chitinase-production	2	2489174	Paenimaribius caenipelagi
GCA_002720735.1	10	['HfsD|Q9A5L5', 'Foo1|A1X158', 'HfsF|Q9A5M1', 'HfsH|Q9A5L9', 'OmpU|P0C6Q6', 'ompA|A0A3B6XXR4', 'yfiB|Q9I4L6', 'sipW|P54506', 'ChiA|P32823', 'SRFAD|Q08788']	3	foo_chia_ompu	adhesion_chitinase-production	2	2026782	Porticoccaceae bacterium
GCA_002697345.1	12	['HfsD|Q9A5L5', 'Foo1|A1X158', 'HfsF|Q9A5M1', 'HfsH|Q9A5L9', 'HfsG|Q9A5M0', 'tpbB|A0A0H2Z7X0', 'ompA|A0A3B6XXR4', 'yfiB|Q9I4L6', 'sipW|P54506', 'ChiA|P32823', 'HfaB|P27343', 'SRFAD|Q08788']	3	hfacces_foo_chia	adhesion_chitinase-production	2	1904441	Rhodobacteraceae bacterium
GCA_001631985.1	10	['HfsF|Q9A5M1', 'HfsE|Q9A5M2', 'HfsG|Q9A5M0', 'tpbB|A0A0H2Z7X0', 'yfiB|Q9I4L6', 'sipW|P54506', 'ChiA|P32823', 'HfsC|Q9A5L8', 'HfaB|P27343', 'SRFAD|Q08788']	2	hfacces_chia	adhesion_chitinase-production	2	1799667	Prochlorococcus sp. MIT 1306
GCA_002682945.1	11	['HfsF|Q9A5M1', 'HfsE|Q9A5M2', 'HfsG|Q9A5M0', 'tpbB|A0A0H2Z7X0', 'yfiB|Q9I4L6', 'sipW|P54506', 'RbmC|A0A2S1ZSI6', 'ChiA|P32823', 'HfsC|Q9A5L8', 'HfsA|Q9A5L6', 'Bap1|Q9KQW0']	3	chia_bap1_rbmc	chitinase-production_adhesion	2	1898111	Cryomorphaceae bacterium
GCA_002683195.1	15	['SRFAA|P27206', 'SRFAB|Q04747', 'HfsD|Q9A5L5', 'Foo1|A1X158', 'HfsF|Q9A5M1', 'HfsG|Q9A5M0', 'HfsH|Q9A5L9', 'sdrC|A0A6A8FED6', 'SRFAC|Q08787', 'yfiB|Q9I4L6', 'GbpA|C3LW75', 'HfsC|Q9A5L8', 'HfaB|P27343', 'HfsA|Q9A5L6', 'SRFAD|Q08788']	5	srf_hfacces_foo_sdrc_gbpa	drag-reducing_adhesion	2	2026778	Phycisphaerae bacterium
GCA_002713705.1	15	['Foo1|A1X158', 'OmpU|P0C6Q6', 'HfsF|Q9A5M1', 'HfsE|Q9A5M2', 'HfsH|Q9A5L9', 'HfsG|Q9A5M0', 'yfiB|Q9I4L6', 'ompW|A0A0F4PBB9', 'sipW|P54506', 'RbmC|A0A2S1ZSI6', 'ChiA|P32823', 'HfsC|Q9A5L8', 'HfaB|P27343', 'Bap1|Q9KQW0', 'SRFAD|Q08788']	6	hfacces_foo_chia_ompu_bap1_rbmc	adhesion_chitinase-production	2	1871037	Flavobacteriaceae bacterium
GCA_003259275.1	23	['SRFAB|Q04747', 'CHPC|Q9AD93', 'ompA|A0A3B6XXR4', 'CHPE|Q9X9Z2', 'SRFAA|P27206', 'CHPG|Q9KYH3', 'CHPA|Q8CJY7', 'HfsD|Q9A5L5', 'HfsF|Q9A5M1', 'HfsE|Q9A5M2', 'HfsG|Q9A5M0', 'HfsH|Q9A5L9', 'SRFAC|Q08787', 'yfiB|Q9I4L6', 'CHPF|Q9KYG7', 'CHPH|Q9AD92', 'sipW|P54506', 'HfsC|Q9A5L8', 'HfsA|Q9A5L6', 'CHPB|Q9X7U2', 'CHPD|Q9L1J9', 'GbpA|C3LW75', 'SRFAD|Q08788']	4	srf_hfs_chp_gbpa	drag-reducing_adhesion	2	1305832	Streptomyces sp. DpondAA-E10
GCA_014164185.1	17	['HfsD|Q9A5L5', 'Foo1|A1X158', 'HfsF|Q9A5M1', 'HfsE|Q9A5M2', 'HfsH|Q9A5L9', 'HfsG|Q9A5M0', 'OmpU|P0C6Q6', 'ompA|A0A3B6XXR4', 'yfiB|Q9I4L6', 'ompW|A0A0F4PBB9', 'GbpA|C3LW75', 'sipW|P54506', 'ChiA|P32823', 'HfsC|Q9A5L8', 'HfaB|P27343', 'HfsA|Q9A5L6', 'SRFAD|Q08788']	6	hfs_hfacces_foo_chia_ompu_gbpa	adhesion_chitinase-production	2	2760959	Shewanella sp. SG44-6
GCA_002694715.1	18	['SRFAA|P27206', 'SRFAB|Q04747', 'HfsD|Q9A5L5', 'OmpU|P0C6Q6', 'HfsG|Q9A5M0', 'HfsE|Q9A5M2', 'HfsH|Q9A5L9', 'ompA|A0A3B6XXR4', 'SRFAC|Q08787', 'yfiB|Q9I4L6', 'ompW|A0A0F4PBB9', 'sipW|P54506', 'RbmC|A0A2S1ZSI6', 'HfsC|Q9A5L8', 'HfaB|P27343', 'HfsA|Q9A5L6', 'Bap1|Q9KQW0', 'SRFAD|Q08788']	5	srf_hfacces_ompu_bap1_rbmc	drag-reducing_adhesion	2	306	Pseudomonas sp.
GCA_000818095.1	13	['HfsD|Q9A5L5', 'Foo1|A1X158', 'HfsF|Q9A5M1', 'HfsH|Q9A5L9', 'HfsG|Q9A5M0', 'sdrC|A0A6A8FED6', 'ompA|A0A3B6XXR4', 'yfiB|Q9I4L6', 'sipW|P54506', 'ChiA|P32823', 'HfsC|Q9A5L8', 'HfsA|Q9A5L6', 'SRFAD|Q08788']	3	foo_chia_sdrc	adhesion_chitinase-production	2	1508404	Jeotgalibacillus malaysiensis
GCA_002712105.1	11	['OmpU|P0C6Q6', 'HfsF|Q9A5M1', 'HfsE|Q9A5M2', 'HfsG|Q9A5M0', 'sdrC|A0A6A8FED6', 'ompA|A0A3B6XXR4', 'yfiB|Q9I4L6', 'sipW|P54506', 'ChiA|P32823', 'HfsC|Q9A5L8', 'HfsA|Q9A5L6']	3	chia_ompu_sdrc	chitinase-production_adhesion	2	2026752	Kiritimatiellaceae bacterium
GCA_002706085.1	17	['SRFAA|P27206', 'SRFAB|Q04747', 'HfsD|Q9A5L5', 'OmpU|P0C6Q6', 'HfsF|Q9A5M1', 'HfsG|Q9A5M0', 'HfsH|Q9A5L9', 'sdrC|A0A6A8FED6', 'ompA|A0A3B6XXR4', 'yfiB|Q9I4L6', 'ompW|A0A0F4PBB9', 'sipW|P54506', 'ChiA|P32823', 'HfsC|Q9A5L8', 'HfaB|P27343', 'HfsA|Q9A5L6', 'SRFAD|Q08788']	4	hfacces_chia_ompu_sdrc	adhesion_chitinase-production	2	2024895	Alcanivoracaceae bacterium
GCA_013364275.1	23	['SRFAB|Q04747', 'CHPC|Q9AD93', 'ompA|A0A3B6XXR4', 'CHPE|Q9X9Z2', 'SRFAA|P27206', 'CHPG|Q9KYH3', 'CHPA|Q8CJY7', 'HfsD|Q9A5L5', 'HfsF|Q9A5M1', 'HfsE|Q9A5M2', 'HfsG|Q9A5M0', 'HfsH|Q9A5L9', 'SRFAC|Q08787', 'yfiB|Q9I4L6', 'CHPF|Q9KYG7', 'CHPH|Q9AD92', 'sipW|P54506', 'HfsC|Q9A5L8', 'HfsA|Q9A5L6', 'CHPB|Q9X7U2', 'CHPD|Q9L1J9', 'GbpA|C3LW75', 'SRFAD|Q08788']	4	srf_hfs_chp_gbpa	drag-reducing_adhesion	2	2742128	Actinomadura sp. NAK00032
GCA_000783325.1	17	['HfsD|Q9A5L5', 'OmpU|P0C6Q6', 'HfsF|Q9A5M1', 'HfsE|Q9A5M2', 'HfsG|Q9A5M0', 'tpbB|A0A0H2Z7X0', 'sdrC|A0A6A8FED6', 'ompA|A0A3B6XXR4', 'yfiB|Q9I4L6', 'GbpA|C3LW75', 'sipW|P54506', 'ChiA|P32823', 'HfsC|Q9A5L8', 'yfiR|Q9I4L4', 'HfaB|P27343', 'HfsA|Q9A5L6', 'SRFAD|Q08788']	6	hfacces_chia_yfi_ompu_sdrc_gbpa	adhesion_chitinase-production	2	990271	Vibrio variabilis
GCA_002723385.1	16	['HfsD|Q9A5L5', 'Foo1|A1X158', 'HfsF|Q9A5M1', 'HfsE|Q9A5M2', 'HfsH|Q9A5L9', 'HfsG|Q9A5M0', 'OmpU|P0C6Q6', 'tpbB|A0A0H2Z7X0', 'sdrC|A0A6A8FED6', 'yfiB|Q9I4L6', 'ompW|A0A0F4PBB9', 'sipW|P54506', 'ChiA|P32823', 'HfsC|Q9A5L8', 'HfsA|Q9A5L6', 'SRFAD|Q08788']	5	hfs_foo_chia_ompu_sdrc	adhesion_chitinase-production	2	1899355	Oceanospirillaceae bacterium
GCA_003863355.1	14	['HfsD|Q9A5L5', 'Foo1|A1X158', 'HfsF|Q9A5M1', 'HfsH|Q9A5L9', 'HfsG|Q9A5M0', 'tpbB|A0A0H2Z7X0', 'sdrC|A0A6A8FED6', 'yfiB|Q9I4L6', 'ompW|A0A0F4PBB9', 'sipW|P54506', 'ChiA|P32823', 'HfsC|Q9A5L8', 'HfsA|Q9A5L6', 'SRFAD|Q08788']	3	foo_chia_sdrc	adhesion_chitinase-production	2	2283627	Ancylomarina euxinus
GCA_003609595.1	12	['HfsD|Q9A5L5', 'HfsF|Q9A5M1', 'HfsE|Q9A5M2', 'HfsH|Q9A5L9', 'HfsG|Q9A5M0', 'tpbB|A0A0H2Z7X0', 'ompA|A0A3B6XXR4', 'yfiB|Q9I4L6', 'sipW|P54506', 'ChiA|P32823', 'HfsC|Q9A5L8', 'HfsA|Q9A5L6']	2	hfs_chia	adhesion_chitinase-production	2	1121266	Caminicella sporogenes
GCA_009910845.1	15	['SRFAA|P27206', 'SRFAB|Q04747', 'HfsD|Q9A5L5', 'HfsF|Q9A5M1', 'HfsG|Q9A5M0', 'HfsH|Q9A5L9', 'sdrC|A0A6A8FED6', 'ompA|A0A3B6XXR4', 'SRFAC|Q08787', 'yfiB|Q9I4L6', 'sipW|P54506', 'RbmC|A0A2S1ZSI6', 'HfsA|Q9A5L6', 'Bap1|Q9KQW0', 'SRFAD|Q08788']	4	srf_sdrc_bap1_rbmc	drag-reducing_adhesion	2	2507566	Chengkuizengella marina
GCA_002709755.1	13	['HfsD|Q9A5L5', 'HfsF|Q9A5M1', 'HfsE|Q9A5M2', 'HfsH|Q9A5L9', 'HfsG|Q9A5M0', 'sdrC|A0A6A8FED6', 'yfiB|Q9I4L6', 'GbpA|C3LW75', 'sipW|P54506', 'ChiA|P32823', 'HfsC|Q9A5L8', 'HfaB|P27343', 'SRFAD|Q08788']	4	hfacces_chia_sdrc_gbpa	adhesion_chitinase-production	2	2026778	Phycisphaerae bacterium
GCA_000973155.1	18	['SRFAA|P27206', 'SRFAB|Q04747', 'HfsD|Q9A5L5', 'OmpU|P0C6Q6', 'HfsG|Q9A5M0', 'HfsE|Q9A5M2', 'HfsH|Q9A5L9', 'tpbB|A0A0H2Z7X0', 'ompA|A0A3B6XXR4', 'yfiB|Q9I4L6', 'GbpA|C3LW75', 'sipW|P54506', 'ChiA|P32823', 'HfsC|Q9A5L8', 'yfiR|Q9I4L4', 'HfaB|P27343', 'HfsA|Q9A5L6', 'SRFAD|Q08788']	5	hfacces_chia_yfi_ompu_gbpa	adhesion_chitinase-production	2	1581149	Grimontia sp. AD028
GCA_001303765.1	12	['SRFAA|P27206', 'SRFAB|Q04747', 'HfsD|Q9A5L5', 'Foo1|A1X158', 'HfsF|Q9A5M1', 'HfsG|Q9A5M0', 'HfsH|Q9A5L9', 'ompA|A0A3B6XXR4', 'SRFAC|Q08787', 'yfiB|Q9I4L6', 'sipW|P54506', 'ChiA|P32823']	2	foo_chia	adhesion_chitinase-production	2	1704235	Chlamydiae bacterium SM23_39
GCA_002729325.1	14	['HfsD|Q9A5L5', 'OmpU|P0C6Q6', 'HfsF|Q9A5M1', 'HfsE|Q9A5M2', 'HfsH|Q9A5L9', 'HfsG|Q9A5M0', 'yfiB|Q9I4L6', 'sipW|P54506', 'RbmC|A0A2S1ZSI6', 'ChiA|P32823', 'HfsC|Q9A5L8', 'HfsA|Q9A5L6', 'Bap1|Q9KQW0', 'SRFAD|Q08788']	5	hfs_chia_ompu_bap1_rbmc	adhesion_chitinase-production	2	1904441	Rhodobacteraceae bacterium
GCA_011089875.1	14	['HfsD|Q9A5L5', 'OmpU|P0C6Q6', 'HfsF|Q9A5M1', 'HfsE|Q9A5M2', 'HfsH|Q9A5L9', 'HfsG|Q9A5M0', 'sdrC|A0A6A8FED6', 'ompA|A0A3B6XXR4', 'yfiB|Q9I4L6', 'sipW|P54506', 'ChiA|P32823', 'HfsC|Q9A5L8', 'HfsA|Q9A5L6', 'SRFAD|Q08788']	4	hfs_chia_ompu_sdrc	adhesion_chitinase-production	2	2714865	Psychroflexus maritimus
GCA_002994635.1	17	['SRFAA|P27206', 'SRFAB|Q04747', 'HfsD|Q9A5L5', 'Foo1|A1X158', 'HfsF|Q9A5M1', 'HfsG|Q9A5M0', 'HfsH|Q9A5L9', 'sdrC|A0A6A8FED6', 'SRFAC|Q08787', 'yfiB|Q9I4L6', 'sipW|P54506', 'RbmC|A0A2S1ZSI6', 'HfsC|Q9A5L8', 'HfaB|P27343', 'HfsA|Q9A5L6', 'Bap1|Q9KQW0', 'SRFAD|Q08788']	6	srf_hfacces_foo_sdrc_bap1_rbmc	drag-reducing_adhesion	2	215803	Enhygromyxa salina
GCA_000829515.1	15	['SRFAA|P27206', 'SRFAB|Q04747', 'HfsD|Q9A5L5', 'Foo1|A1X158', 'HfsF|Q9A5M1', 'HfsG|Q9A5M0', 'HfsH|Q9A5L9', 'ompA|A0A3B6XXR4', 'tasA|P54507', 'yfiB|Q9I4L6', 'sipW|P54506', 'ChiA|P32823', 'HfsC|Q9A5L8', 'HfsA|Q9A5L6', 'SRFAD|Q08788']	3	foo_chia_tapA	adhesion_chitinase-production	2	220754	Jeotgalibacillus campisalis
GCA_005877035.1	19	['Foo1|A1X158', 'ompA|A0A3B6XXR4', 'HfaB|P27343', 'OmpU|P0C6Q6', 'tpbB|A0A0H2Z7X0', 'ompW|A0A0F4PBB9', 'HfsD|Q9A5L5', 'HfsF|Q9A5M1', 'HfsE|Q9A5M2', 'HfsH|Q9A5L9', 'HfsG|Q9A5M0', 'yfiB|Q9I4L6', 'sipW|P54506', 'ChiA|P32823', 'HfsC|Q9A5L8', 'yfiR|Q9I4L4', 'HfsA|Q9A5L6', 'GbpA|C3LW75', 'SRFAD|Q08788']	7	hfs_hfacces_foo_chia_yfi_ompu_gbpa	adhesion_chitinase-production	2	77608	Pseudoalteromonas distincta
GCA_005930865.1	17	['HfsD|Q9A5L5', 'Foo1|A1X158', 'HfsF|Q9A5M1', 'HfsE|Q9A5M2', 'HfsH|Q9A5L9', 'HfsG|Q9A5M0', 'OmpU|P0C6Q6', 'tpbB|A0A0H2Z7X0', 'sdrC|A0A6A8FED6', 'ompA|A0A3B6XXR4', 'yfiB|Q9I4L6', 'ompW|A0A0F4PBB9', 'sipW|P54506', 'ChiA|P32823', 'HfaB|P27343', 'HfsA|Q9A5L6', 'SRFAD|Q08788']	5	hfacces_foo_chia_ompu_sdrc	adhesion_chitinase-production	2	2066516	Pseudoalteromonas sp. S554
GCA_004348605.1	14	['SRFAA|P27206', 'SRFAB|Q04747', 'HfsD|Q9A5L5', 'HfsF|Q9A5M1', 'HfsE|Q9A5M2', 'HfsG|Q9A5M0', 'HfsH|Q9A5L9', 'ompA|A0A3B6XXR4', 'SRFAC|Q08787', 'yfiB|Q9I4L6', 'GbpA|C3LW75', 'sipW|P54506', 'HfsC|Q9A5L8', 'SRFAD|Q08788']	2	srf_gbpa	drag-reducing_adhesion	2	1629071	Micromonospora fluostatini
GCA_002707835.1	8	['HfsF|Q9A5M1', 'HfsG|Q9A5M0', 'tpbB|A0A0H2Z7X0', 'sipW|P54506', 'RbmC|A0A2S1ZSI6', 'ChiA|P32823', 'Bap1|Q9KQW0', 'SRFAD|Q08788']	3	chia_bap1_rbmc	chitinase-production_adhesion	2	2026724	Chloroflexi bacterium
GCA_002701955.1	14	['HfsD|Q9A5L5', 'OmpU|P0C6Q6', 'HfsG|Q9A5M0', 'HfsE|Q9A5M2', 'HfsH|Q9A5L9', 'tpbB|A0A0H2Z7X0', 'yfiB|Q9I4L6', 'ompW|A0A0F4PBB9', 'sipW|P54506', 'RbmC|A0A2S1ZSI6', 'ChiA|P32823', 'HfsA|Q9A5L6', 'Bap1|Q9KQW0', 'SRFAD|Q08788']	4	chia_ompu_bap1_rbmc	chitinase-production_adhesion	2	2026730	Cytophagia bacterium
GCA_002683995.1	13	['HfsD|Q9A5L5', 'HfsF|Q9A5M1', 'HfsE|Q9A5M2', 'HfsH|Q9A5L9', 'HfsG|Q9A5M0', 'tpbB|A0A0H2Z7X0', 'sdrC|A0A6A8FED6', 'yfiB|Q9I4L6', 'sipW|P54506', 'ChiA|P32823', 'HfsC|Q9A5L8', 'HfsA|Q9A5L6', 'SRFAD|Q08788']	3	hfs_chia_sdrc	adhesion_chitinase-production	2	2026801	Verrucomicrobiales bacterium
GCA_002692925.1	16	['HfsD|Q9A5L5', 'Foo1|A1X158', 'HfsF|Q9A5M1', 'HfsH|Q9A5L9', 'HfsG|Q9A5M0', 'OmpU|P0C6Q6', 'sdrC|A0A6A8FED6', 'ompA|A0A3B6XXR4', 'yfiB|Q9I4L6', 'ompW|A0A0F4PBB9', 'sipW|P54506', 'ChiA|P32823', 'HfsC|Q9A5L8', 'HfaB|P27343', 'HfsA|Q9A5L6', 'SRFAD|Q08788']	5	hfacces_foo_chia_ompu_sdrc	adhesion_chitinase-production	2	87	Hyphomonas sp.
GCA_001303605.1	13	['SRFAA|P27206', 'SRFAB|Q04747', 'HfsD|Q9A5L5', 'HfsG|Q9A5M0', 'HfsE|Q9A5M2', 'HfsH|Q9A5L9', 'sdrC|A0A6A8FED6', 'SRFAC|Q08787', 'yfiB|Q9I4L6', 'ChiA|P32823', 'HfsC|Q9A5L8', 'HfaB|P27343', 'HfsA|Q9A5L6']	3	hfacces_chia_sdrc	adhesion_chitinase-production	2	1704028	Planctomycetes bacterium SM23_25
GCA_000260115.1	13	['HfsF|Q9A5M1', 'HfsH|Q9A5L9', 'HfsG|Q9A5M0', 'tpbB|A0A0H2Z7X0', 'sdrC|A0A6A8FED6', 'ompA|A0A3B6XXR4', 'yfiB|Q9I4L6', 'ompW|A0A0F4PBB9', 'sipW|P54506', 'ChiA|P32823', 'HfsC|Q9A5L8', 'HfaB|P27343', 'SRFAD|Q08788']	3	hfacces_chia_sdrc	adhesion_chitinase-production	2	926559	Joostella marina
GCA_002872765.1	20	['SRFAB|Q04747', 'ompA|A0A3B6XXR4', 'HfaB|P27343', 'SRFAA|P27206', 'OmpU|P0C6Q6', 'tpbB|A0A0H2Z7X0', 'ompW|A0A0F4PBB9', 'RbmC|A0A2S1ZSI6', 'Bap1|Q9KQW0', 'HfsD|Q9A5L5', 'HfsG|Q9A5M0', 'HfsH|Q9A5L9', 'yfiB|Q9I4L6', 'sipW|P54506', 'ChiA|P32823', 'HfsC|Q9A5L8', 'yfiR|Q9I4L4', 'HfsA|Q9A5L6', 'GbpA|C3LW75', 'SRFAD|Q08788']	7	hfacces_chia_yfi_ompu_bap1_rbmc_gbpa	adhesion_chitinase-production	2	1880852	Vibrio sp. 10N.286.45.B6
GCA_002705575.1	11	['HfsD|Q9A5L5', 'HfsF|Q9A5M1', 'HfsH|Q9A5L9', 'HfsG|Q9A5M0', 'yfiB|Q9I4L6', 'sipW|P54506', 'ChiA|P32823', 'HfsC|Q9A5L8', 'HfaB|P27343', 'HfsA|Q9A5L6', 'SRFAD|Q08788']	2	hfacces_chia	adhesion_chitinase-production	2	2026760	Candidatus Marinimicrobia bacterium
GCA_013315265.1	11	['HfsD|Q9A5L5', 'OmpU|P0C6Q6', 'HfsG|Q9A5M0', 'HfsH|Q9A5L9', 'sdrC|A0A6A8FED6', 'yfiB|Q9I4L6', 'sipW|P54506', 'ChiA|P32823', 'HfsC|Q9A5L8', 'HfsA|Q9A5L6', 'SRFAD|Q08788']	3	chia_ompu_sdrc	chitinase-production_adhesion	2	2614809	Sulfitobacter algicola
GCA_009734345.1	16	['HfsD|Q9A5L5', 'OmpU|P0C6Q6', 'HfsF|Q9A5M1', 'HfsH|Q9A5L9', 'HfsG|Q9A5M0', 'sdrC|A0A6A8FED6', 'ompA|A0A3B6XXR4', 'yfiB|Q9I4L6', 'ompW|A0A0F4PBB9', 'sipW|P54506', 'RbmC|A0A2S1ZSI6', 'ChiA|P32823', 'HfaB|P27343', 'HfsA|Q9A5L6', 'Bap1|Q9KQW0', 'SRFAD|Q08788']	6	hfacces_chia_ompu_sdrc_bap1_rbmc	adhesion_chitinase-production	2	1940690	Idiomarina andamanensis
GCA_000299875.1	12	['HfsD|Q9A5L5', 'OmpU|P0C6Q6', 'HfsF|Q9A5M1', 'HfsH|Q9A5L9', 'HfsG|Q9A5M0', 'yfiB|Q9I4L6', 'ompW|A0A0F4PBB9', 'sipW|P54506', 'ChiA|P32823', 'HfaB|P27343', 'HfsA|Q9A5L6', 'SRFAD|Q08788']	3	hfacces_chia_ompu	adhesion_chitinase-production	2	1208323	Celeribacter baekdonensis
GCA_002713385.1	12	['HfsD|Q9A5L5', 'HfsF|Q9A5M1', 'HfsE|Q9A5M2', 'HfsG|Q9A5M0', 'tpbB|A0A0H2Z7X0', 'sdrC|A0A6A8FED6', 'sipW|P54506', 'RbmC|A0A2S1ZSI6', 'ChiA|P32823', 'HfsC|Q9A5L8', 'HfsA|Q9A5L6', 'Bap1|Q9KQW0']	4	chia_sdrc_bap1_rbmc	chitinase-production_adhesion	2	2026760	Candidatus Marinimicrobia bacterium
GCA_002707725.1	14	['HfsD|Q9A5L5', 'OmpU|P0C6Q6', 'HfsF|Q9A5M1', 'HfsE|Q9A5M2', 'HfsH|Q9A5L9', 'HfsG|Q9A5M0', 'tpbB|A0A0H2Z7X0', 'yfiB|Q9I4L6', 'sipW|P54506', 'ChiA|P32823', 'HfsC|Q9A5L8', 'yfiR|Q9I4L4', 'HfaB|P27343', 'HfsA|Q9A5L6']	5	hfs_hfacces_chia_yfi_ompu	adhesion_chitinase-production	2	2026751	Kangiellaceae bacterium
GCA_002709545.1	12	['HfsD|Q9A5L5', 'HfsG|Q9A5M0', 'HfsE|Q9A5M2', 'HfsH|Q9A5L9', 'sdrC|A0A6A8FED6', 'yfiB|Q9I4L6', 'RbmC|A0A2S1ZSI6', 'ChiA|P32823', 'HfsC|Q9A5L8', 'HfsA|Q9A5L6', 'Bap1|Q9KQW0', 'SRFAD|Q08788']	4	chia_sdrc_bap1_rbmc	chitinase-production_adhesion	2	37635	Planctomyces sp.
GCA_013364335.1	25	['SRFAB|Q04747', 'CHPC|Q9AD93', 'Foo1|A1X158', 'ompA|A0A3B6XXR4', 'CHPE|Q9X9Z2', 'SRFAA|P27206', 'CHPG|Q9KYH3', 'CHPA|Q8CJY7', 'HfsD|Q9A5L5', 'HfsF|Q9A5M1', 'HfsE|Q9A5M2', 'HfsG|Q9A5M0', 'HfsH|Q9A5L9', 'SRFAC|Q08787', 'yfiB|Q9I4L6', 'CHPF|Q9KYG7', 'CHPH|Q9AD92', 'sipW|P54506', 'HfsC|Q9A5L8', 'HfsA|Q9A5L6', 'CHPB|Q9X7U2', 'sdrC|A0A6A8FED6', 'CHPD|Q9L1J9', 'GbpA|C3LW75', 'SRFAD|Q08788']	6	srf_hfs_chp_foo_sdrc_gbpa	drag-reducing_adhesion	2	2763006	Streptomyces buecherae
GCA_014163535.1	19	['ompA|A0A3B6XXR4', 'HfaB|P27343', 'OmpU|P0C6Q6', 'tpbB|A0A0H2Z7X0', 'ompW|A0A0F4PBB9', 'RbmC|A0A2S1ZSI6', 'Bap1|Q9KQW0', 'HfsD|Q9A5L5', 'HfsF|Q9A5M1', 'HfsE|Q9A5M2', 'HfsH|Q9A5L9', 'HfsG|Q9A5M0', 'yfiB|Q9I4L6', 'sipW|P54506', 'ChiA|P32823', 'HfsC|Q9A5L8', 'HfsA|Q9A5L6', 'GbpA|C3LW75', 'SRFAD|Q08788']	7	hfs_hfacces_chia_ompu_bap1_rbmc_gbpa	adhesion_chitinase-production	2	2760929	Pseudoalteromonas sp. SR45-4
GCA_002684955.1	17	['SRFAA|P27206', 'SRFAB|Q04747', 'HfsD|Q9A5L5', 'Foo1|A1X158', 'HfsG|Q9A5M0', 'HfsE|Q9A5M2', 'HfsH|Q9A5L9', 'OmpU|P0C6Q6', 'tpbB|A0A0H2Z7X0', 'SRFAC|Q08787', 'yfiB|Q9I4L6', 'ompW|A0A0F4PBB9', 'sipW|P54506', 'RbmC|A0A2S1ZSI6', 'HfsC|Q9A5L8', 'Bap1|Q9KQW0', 'SRFAD|Q08788']	5	srf_foo_ompu_bap1_rbmc	drag-reducing_adhesion	2	2024861	Tistrella sp.
GCA_002875905.1	20	['SRFAB|Q04747', 'ompA|A0A3B6XXR4', 'HfaB|P27343', 'SRFAA|P27206', 'OmpU|P0C6Q6', 'tpbB|A0A0H2Z7X0', 'ompW|A0A0F4PBB9', 'RbmC|A0A2S1ZSI6', 'Bap1|Q9KQW0', 'HfsD|Q9A5L5', 'HfsG|Q9A5M0', 'HfsH|Q9A5L9', 'yfiB|Q9I4L6', 'sipW|P54506', 'ChiA|P32823', 'HfsC|Q9A5L8', 'yfiR|Q9I4L4', 'HfsA|Q9A5L6', 'GbpA|C3LW75', 'SRFAD|Q08788']	7	hfacces_chia_yfi_ompu_bap1_rbmc_gbpa	adhesion_chitinase-production	2	1880846	Vibrio sp. 10N.261.46.F12
GCA_002724455.1	15	['SRFAA|P27206', 'SRFAB|Q04747', 'HfsD|Q9A5L5', 'HfsF|Q9A5M1', 'HfsE|Q9A5M2', 'HfsG|Q9A5M0', 'HfsH|Q9A5L9', 'tpbB|A0A0H2Z7X0', 'sdrC|A0A6A8FED6', 'SRFAC|Q08787', 'ompA|A0A3B6XXR4', 'yfiB|Q9I4L6', 'sipW|P54506', 'ChiA|P32823', 'HfsC|Q9A5L8']	2	chia_sdrc	chitinase-production_adhesion	2	2026800	Verrucomicrobiaceae bacterium
GCA_014163665.1	18	['HfsD|Q9A5L5', 'OmpU|P0C6Q6', 'HfsG|Q9A5M0', 'HfsE|Q9A5M2', 'HfsH|Q9A5L9', 'tpbB|A0A0H2Z7X0', 'ompA|A0A3B6XXR4', 'yfiB|Q9I4L6', 'GbpA|C3LW75', 'sipW|P54506', 'RbmC|A0A2S1ZSI6', 'ChiA|P32823', 'HfsC|Q9A5L8', 'yfiR|Q9I4L4', 'HfaB|P27343', 'HfsA|Q9A5L6', 'Bap1|Q9KQW0', 'SRFAD|Q08788']	7	hfacces_chia_yfi_ompu_bap1_rbmc_gbpa	adhesion_chitinase-production	2	2760931	Aliivibrio sp. SR45-2
GCA_002704045.1	11	['OmpU|P0C6Q6', 'HfsF|Q9A5M1', 'HfsE|Q9A5M2', 'HfsH|Q9A5L9', 'HfsG|Q9A5M0', 'tpbB|A0A0H2Z7X0', 'yfiB|Q9I4L6', 'sipW|P54506', 'ChiA|P32823', 'HfaB|P27343', 'pilF|A0A290TXQ9']	3	hfacces_chia_ompu	adhesion_chitinase-production	2	2026760	Candidatus Marinimicrobia bacterium
GCA_002719735.1	19	['Foo1|A1X158', 'ompA|A0A3B6XXR4', 'HfaB|P27343', 'OmpU|P0C6Q6', 'ompW|A0A0F4PBB9', 'RbmC|A0A2S1ZSI6', 'Bap1|Q9KQW0', 'HfsD|Q9A5L5', 'HfsF|Q9A5M1', 'HfsE|Q9A5M2', 'HfsH|Q9A5L9', 'HfsG|Q9A5M0', 'yfiB|Q9I4L6', 'sipW|P54506', 'ChiA|P32823', 'HfsC|Q9A5L8', 'HfsA|Q9A5L6', 'sdrC|A0A6A8FED6', 'SRFAD|Q08788']	8	hfs_hfacces_foo_chia_ompu_sdrc_bap1_rbmc	adhesion_chitinase-production	2	1872427	Alcanivorax sp.
GCA_001635805.1	19	['ompA|A0A3B6XXR4', 'HfaB|P27343', 'OmpU|P0C6Q6', 'tpbB|A0A0H2Z7X0', 'ompW|A0A0F4PBB9', 'RbmC|A0A2S1ZSI6', 'Bap1|Q9KQW0', 'HfsD|Q9A5L5', 'HfsF|Q9A5M1', 'HfsE|Q9A5M2', 'HfsH|Q9A5L9', 'HfsG|Q9A5M0', 'yfiB|Q9I4L6', 'sipW|P54506', 'ChiA|P32823', 'HfsC|Q9A5L8', 'HfsA|Q9A5L6', 'sdrC|A0A6A8FED6', 'SRFAD|Q08788']	7	hfs_hfacces_chia_ompu_sdrc_bap1_rbmc	adhesion_chitinase-production	2	1822246	Oleiphilus sp. HI0071
GCA_002690905.1	10	['HfsD|Q9A5L5', 'OmpU|P0C6Q6', 'HfsG|Q9A5M0', 'HfsH|Q9A5L9', 'tpbB|A0A0H2Z7X0', 'yfiB|Q9I4L6', 'RbmC|A0A2S1ZSI6', 'ChiA|P32823', 'Bap1|Q9KQW0', 'SRFAD|Q08788']	4	chia_ompu_bap1_rbmc	chitinase-production_adhesion	2	1904441	Rhodobacteraceae bacterium
GCA_900129175.1	14	['SRFAA|P27206', 'SRFAB|Q04747', 'HfsD|Q9A5L5', 'HfsF|Q9A5M1', 'HfsG|Q9A5M0', 'HfsH|Q9A5L9', 'sdrC|A0A6A8FED6', 'ompA|A0A3B6XXR4', 'yfiB|Q9I4L6', 'sipW|P54506', 'ChiA|P32823', 'HfsC|Q9A5L8', 'HfsA|Q9A5L6', 'SRFAD|Q08788']	2	chia_sdrc	chitinase-production_adhesion	2	1122195	Marinitoga hydrogenitolerans
GCA_002685155.1	14	['SRFAA|P27206', 'SRFAB|Q04747', 'HfsD|Q9A5L5', 'Foo1|A1X158', 'HfsF|Q9A5M1', 'HfsE|Q9A5M2', 'HfsG|Q9A5M0', 'sdrC|A0A6A8FED6', 'yfiB|Q9I4L6', 'sipW|P54506', 'ChiA|P32823', 'HfsC|Q9A5L8', 'HfaB|P27343', 'SRFAD|Q08788']	4	hfacces_foo_chia_sdrc	adhesion_chitinase-production	2	2026763	Myxococcales bacterium
GCA_003269425.1	16	['HfsD|Q9A5L5', 'Foo1|A1X158', 'HfsG|Q9A5M0', 'HfsH|Q9A5L9', 'sdrC|A0A6A8FED6', 'tpbB|A0A0H2Z7X0', 'ompA|A0A3B6XXR4', 'yfiB|Q9I4L6', 'ompW|A0A0F4PBB9', 'sipW|P54506', 'RbmC|A0A2S1ZSI6', 'ChiA|P32823', 'HfsC|Q9A5L8', 'HfsA|Q9A5L6', 'Bap1|Q9KQW0', 'SRFAD|Q08788']	5	foo_chia_sdrc_bap1_rbmc	adhesion_chitinase-production	2	1383885	Muricauda aurantiaca
GCA_001635155.1	14	['SRFAA|P27206', 'SRFAB|Q04747', 'HfsD|Q9A5L5', 'OmpU|P0C6Q6', 'HfsF|Q9A5M1', 'bslB|P39632', 'HfsG|Q9A5M0', 'HfsH|Q9A5L9', 'sdrC|A0A6A8FED6', 'SRFAD|Q08788', 'yfiB|Q9I4L6', 'sipW|P54506', 'HfsA|Q9A5L6', 'bslA|P71014']	3	bsl_ompu_sdrc	drag-reducing_adhesion	2	1822257	Sulfitobacter sp. HI0082
GCA_001767295.1	18	['HfsD|Q9A5L5', 'Foo1|A1X158', 'HfsF|Q9A5M1', 'HfsH|Q9A5L9', 'HfsG|Q9A5M0', 'OmpU|P0C6Q6', 'sdrC|A0A6A8FED6', 'ompA|A0A3B6XXR4', 'yfiB|Q9I4L6', 'ompW|A0A0F4PBB9', 'pilF|A0A290TXQ9', 'sipW|P54506', 'ChiA|P32823', 'HfsC|Q9A5L8', 'yfiR|Q9I4L4', 'HfaB|P27343', 'HfsA|Q9A5L6', 'SRFAD|Q08788']	6	hfacces_foo_chia_omp_ompu_sdrc	adhesion_chitinase-production	2	1816218	Colwellia sp. PAMC 20917
GCA_000265385.1	17	['HfsD|Q9A5L5', 'HfsF|Q9A5M1', 'HfsE|Q9A5M2', 'HfsH|Q9A5L9', 'HfsG|Q9A5M0', 'tpbB|A0A0H2Z7X0', 'tasA|P54507', 'sdrC|A0A6A8FED6', 'ompA|A0A3B6XXR4', 'yfiB|Q9I4L6', 'ompW|A0A0F4PBB9', 'sipW|P54506', 'ChiA|P32823', 'HfsC|Q9A5L8', 'HfaB|P27343', 'HfsA|Q9A5L6', 'SRFAD|Q08788']	5	hfs_hfacces_chia_tapA_sdrc	adhesion_chitinase-production	2	746697	Aequorivita sublithincola
GCA_001635225.1	20	['SRFAB|Q04747', 'Foo1|A1X158', 'ompA|A0A3B6XXR4', 'HfaB|P27343', 'SRFAA|P27206', 'OmpU|P0C6Q6', 'tpbB|A0A0H2Z7X0', 'ompW|A0A0F4PBB9', 'HfsD|Q9A5L5', 'HfsF|Q9A5M1', 'HfsE|Q9A5M2', 'HfsG|Q9A5M0', 'HfsH|Q9A5L9', 'yfiB|Q9I4L6', 'sipW|P54506', 'ChiA|P32823', 'HfsC|Q9A5L8', 'HfsA|Q9A5L6', 'sdrC|A0A6A8FED6', 'SRFAD|Q08788']	6	hfs_hfacces_foo_chia_ompu_sdrc	adhesion_chitinase-production	2	1822260	Oleiphilus sp. HI0086
GCA_900176595.1	19	['SRFAB|Q04747', 'Foo1|A1X158', 'SRFAA|P27206', 'tpbB|A0A0H2Z7X0', 'ompW|A0A0F4PBB9', 'RbmC|A0A2S1ZSI6', 'Bap1|Q9KQW0', 'HfsD|Q9A5L5', 'HfsF|Q9A5M1', 'HfsE|Q9A5M2', 'HfsG|Q9A5M0', 'HfsH|Q9A5L9', 'SRFAC|Q08787', 'yfiB|Q9I4L6', 'sipW|P54506', 'HfsC|Q9A5L8', 'HfsA|Q9A5L6', 'sdrC|A0A6A8FED6', 'SRFAD|Q08788']	6	srf_hfs_foo_sdrc_bap1_rbmc	drag-reducing_adhesion	2	758820	Aquiflexum balticum
GCA_900109075.1	17	['HfsD|Q9A5L5', 'Foo1|A1X158', 'HfsF|Q9A5M1', 'HfsE|Q9A5M2', 'HfsH|Q9A5L9', 'HfsG|Q9A5M0', 'tpbB|A0A0H2Z7X0', 'ompA|A0A3B6XXR4', 'yfiB|Q9I4L6', 'ompW|A0A0F4PBB9', 'sipW|P54506', 'RbmC|A0A2S1ZSI6', 'ChiA|P32823', 'HfaB|P27343', 'HfsA|Q9A5L6', 'Bap1|Q9KQW0', 'SRFAD|Q08788']	5	hfacces_foo_chia_bap1_rbmc	adhesion_chitinase-production	2	703342	Myroides marinus
GCA_900112595.1	15	['HfsD|Q9A5L5', 'HfsF|Q9A5M1', 'HfsE|Q9A5M2', 'HfsH|Q9A5L9', 'HfsG|Q9A5M0', 'tpbB|A0A0H2Z7X0', 'sdrC|A0A6A8FED6', 'yfiB|Q9I4L6', 'sipW|P54506', 'RbmC|A0A2S1ZSI6', 'ChiA|P32823', 'HfsC|Q9A5L8', 'yfiR|Q9I4L4', 'HfsA|Q9A5L6', 'Bap1|Q9KQW0']	6	hfs_chia_yfi_sdrc_bap1_rbmc	adhesion_chitinase-production	2	870482	Algibacter pectinivorans
GCA_014163715.1	18	['HfsD|Q9A5L5', 'Foo1|A1X158', 'HfsF|Q9A5M1', 'HfsH|Q9A5L9', 'HfsG|Q9A5M0', 'OmpU|P0C6Q6', 'tpbB|A0A0H2Z7X0', 'ompA|A0A3B6XXR4', 'yfiB|Q9I4L6', 'ompW|A0A0F4PBB9', 'sipW|P54506', 'RbmC|A0A2S1ZSI6', 'ChiA|P32823', 'yfiR|Q9I4L4', 'HfaB|P27343', 'HfsA|Q9A5L6', 'Bap1|Q9KQW0', 'SRFAD|Q08788']	7	hfacces_foo_chia_yfi_ompu_bap1_rbmc	adhesion_chitinase-production	2	2760935	Shewanella sp. SR44-4
GCA_001974575.1	20	['SRFAB|Q04747', 'ompA|A0A3B6XXR4', 'HfaB|P27343', 'SRFAA|P27206', 'OmpU|P0C6Q6', 'tpbB|A0A0H2Z7X0', 'ompW|A0A0F4PBB9', 'RbmC|A0A2S1ZSI6', 'Bap1|Q9KQW0', 'HfsD|Q9A5L5', 'HfsG|Q9A5M0', 'HfsH|Q9A5L9', 'yfiB|Q9I4L6', 'sipW|P54506', 'ChiA|P32823', 'HfsC|Q9A5L8', 'yfiR|Q9I4L4', 'HfsA|Q9A5L6', 'GbpA|C3LW75', 'SRFAD|Q08788']	7	hfacces_chia_yfi_ompu_bap1_rbmc_gbpa	adhesion_chitinase-production	2	1903177	Vibrio sp. 10N.261.45.E1
GCA_002730255.1	12	['OmpU|P0C6Q6', 'HfsF|Q9A5M1', 'HfsH|Q9A5L9', 'HfsG|Q9A5M0', 'tpbB|A0A0H2Z7X0', 'ompA|A0A3B6XXR4', 'yfiB|Q9I4L6', 'sipW|P54506', 'RbmC|A0A2S1ZSI6', 'ChiA|P32823', 'Bap1|Q9KQW0', 'SRFAD|Q08788']	4	chia_ompu_bap1_rbmc	chitinase-production_adhesion	2	2026743	Halieaceae bacterium
GCA_008014675.1	17	['HfsD|Q9A5L5', 'Foo1|A1X158', 'HfsF|Q9A5M1', 'HfsE|Q9A5M2', 'HfsH|Q9A5L9', 'HfsG|Q9A5M0', 'tpbB|A0A0H2Z7X0', 'sdrC|A0A6A8FED6', 'ompA|A0A3B6XXR4', 'yfiB|Q9I4L6', 'sipW|P54506', 'RbmC|A0A2S1ZSI6', 'ChiA|P32823', 'HfsC|Q9A5L8', 'HfsA|Q9A5L6', 'Bap1|Q9KQW0', 'SRFAD|Q08788']	6	hfs_foo_chia_sdrc_bap1_rbmc	adhesion_chitinase-production	2	2602767	Lewinella aurantiaca
GCA_014163735.1	18	['HfsD|Q9A5L5', 'OmpU|P0C6Q6', 'HfsF|Q9A5M1', 'HfsE|Q9A5M2', 'HfsG|Q9A5M0', 'tpbB|A0A0H2Z7X0', 'sdrC|A0A6A8FED6', 'ompA|A0A3B6XXR4', 'yfiB|Q9I4L6', 'ompW|A0A0F4PBB9', 'GbpA|C3LW75', 'sipW|P54506', 'RbmC|A0A2S1ZSI6', 'ChiA|P32823', 'HfaB|P27343', 'HfsA|Q9A5L6', 'Bap1|Q9KQW0', 'SRFAD|Q08788']	7	hfacces_chia_ompu_sdrc_bap1_rbmc_gbpa	adhesion_chitinase-production	2	2760936	Shewanella sp. SR44-3
GCA_900116285.1	13	['SRFAA|P27206', 'SRFAB|Q04747', 'HfsD|Q9A5L5', 'OmpU|P0C6Q6', 'HfsG|Q9A5M0', 'HfsE|Q9A5M2', 'HfsH|Q9A5L9', 'SRFAC|Q08787', 'yfiB|Q9I4L6', 'sipW|P54506', 'HfsC|Q9A5L8', 'HfsA|Q9A5L6', 'SRFAD|Q08788']	2	srf_ompu	drag-reducing_adhesion	2	394264	Sulfitobacter marinus
GCA_002719515.1	16	['HfsD|Q9A5L5', 'HfsF|Q9A5M1', 'HfsE|Q9A5M2', 'HfsH|Q9A5L9', 'HfsG|Q9A5M0', 'tpbB|A0A0H2Z7X0', 'ompA|A0A3B6XXR4', 'yfiB|Q9I4L6', 'ompW|A0A0F4PBB9', 'sipW|P54506', 'RbmC|A0A2S1ZSI6', 'ChiA|P32823', 'HfsC|Q9A5L8', 'HfsA|Q9A5L6', 'Bap1|Q9KQW0', 'SRFAD|Q08788']	4	hfs_chia_bap1_rbmc	adhesion_chitinase-production	2	1932666	Haliea sp.
GCA_002875485.1	19	['ompA|A0A3B6XXR4', 'HfaB|P27343', 'OmpU|P0C6Q6', 'tpbB|A0A0H2Z7X0', 'ompW|A0A0F4PBB9', 'RbmC|A0A2S1ZSI6', 'Bap1|Q9KQW0', 'HfsD|Q9A5L5', 'HfsF|Q9A5M1', 'HfsH|Q9A5L9', 'HfsG|Q9A5M0', 'yfiB|Q9I4L6', 'sipW|P54506', 'ChiA|P32823', 'HfsC|Q9A5L8', 'yfiR|Q9I4L4', 'HfsA|Q9A5L6', 'GbpA|C3LW75', 'SRFAD|Q08788']	7	hfacces_chia_yfi_ompu_bap1_rbmc_gbpa	adhesion_chitinase-production	2	1884468	Vibrio sp. 10N.222.54.B6
GCA_002703245.1	18	['CHPC|Q9AD93', 'CHPA|Q8CJY7', 'HfsD|Q9A5L5', 'HfsF|Q9A5M1', 'CHPD|Q9L1J9', 'HfsE|Q9A5M2', 'HfsG|Q9A5M0', 'HfsH|Q9A5L9', 'SRFAD|Q08788', 'CHPF|Q9KYG7', 'CHPG|Q9KYH3', 'CHPH|Q9AD92', 'sipW|P54506', 'HfsC|Q9A5L8', 'HfaB|P27343', 'HfsA|Q9A5L6', 'CHPB|Q9X7U2', 'CHPE|Q9X9Z2']	3	hfs_hfacces_chp	adhesion_drag-reducing	2	51671	Microbacterium sp.
GCA_014163885.1	19	['Foo1|A1X158', 'ompA|A0A3B6XXR4', 'HfaB|P27343', 'OmpU|P0C6Q6', 'tpbB|A0A0H2Z7X0', 'ompW|A0A0F4PBB9', 'HfsD|Q9A5L5', 'HfsF|Q9A5M1', 'HfsE|Q9A5M2', 'HfsH|Q9A5L9', 'HfsG|Q9A5M0', 'yfiB|Q9I4L6', 'sipW|P54506', 'ChiA|P32823', 'HfsC|Q9A5L8', 'yfiR|Q9I4L4', 'HfsA|Q9A5L6', 'GbpA|C3LW75', 'SRFAD|Q08788']	7	hfs_hfacces_foo_chia_yfi_ompu_gbpa	adhesion_chitinase-production	2	2760944	Pseudoalteromonas sp. SR43-2
GCA_900129005.1	14	['HfsD|Q9A5L5', 'HfsF|Q9A5M1', 'HfsE|Q9A5M2', 'HfsH|Q9A5L9', 'HfsG|Q9A5M0', 'tpbB|A0A0H2Z7X0', 'sdrC|A0A6A8FED6', 'ompA|A0A3B6XXR4', 'yfiB|Q9I4L6', 'sipW|P54506', 'ChiA|P32823', 'HfsC|Q9A5L8', 'HfsA|Q9A5L6', 'SRFAD|Q08788']	3	hfs_chia_sdrc	adhesion_chitinase-production	2	1122159	Leeuwenhoekiella marinoflava
GCA_002875685.1	20	['SRFAB|Q04747', 'ompA|A0A3B6XXR4', 'HfaB|P27343', 'SRFAA|P27206', 'OmpU|P0C6Q6', 'tpbB|A0A0H2Z7X0', 'ompW|A0A0F4PBB9', 'RbmC|A0A2S1ZSI6', 'Bap1|Q9KQW0', 'HfsD|Q9A5L5', 'HfsG|Q9A5M0', 'HfsH|Q9A5L9', 'yfiB|Q9I4L6', 'sipW|P54506', 'ChiA|P32823', 'HfsC|Q9A5L8', 'yfiR|Q9I4L4', 'HfsA|Q9A5L6', 'GbpA|C3LW75', 'SRFAD|Q08788']	7	hfacces_chia_yfi_ompu_bap1_rbmc_gbpa	adhesion_chitinase-production	2	1880843	Vibrio sp. 10N.261.45.E11
GCA_001635175.1	18	['HfsD|Q9A5L5', 'Foo1|A1X158', 'HfsF|Q9A5M1', 'HfsH|Q9A5L9', 'HfsG|Q9A5M0', 'OmpU|P0C6Q6', 'sdrC|A0A6A8FED6', 'ompA|A0A3B6XXR4', 'yfiB|Q9I4L6', 'ompW|A0A0F4PBB9', 'sipW|P54506', 'RbmC|A0A2S1ZSI6', 'ChiA|P32823', 'HfsC|Q9A5L8', 'HfaB|P27343', 'HfsA|Q9A5L6', 'Bap1|Q9KQW0', 'SRFAD|Q08788']	7	hfacces_foo_chia_ompu_sdrc_bap1_rbmc	adhesion_chitinase-production	2	1822258	Alcanivorax sp. HI0083
GCA_002697225.1	12	['HfsD|Q9A5L5', 'HfsF|Q9A5M1', 'HfsH|Q9A5L9', 'HfsG|Q9A5M0', 'sdrC|A0A6A8FED6', 'ompA|A0A3B6XXR4', 'yfiB|Q9I4L6', 'sipW|P54506', 'ChiA|P32823', 'HfsC|Q9A5L8', 'HfaB|P27343', 'HfsA|Q9A5L6']	3	hfacces_chia_sdrc	adhesion_chitinase-production	2	2026781	Candidatus Poribacteria bacterium
GCA_001635765.1	18	['HfsD|Q9A5L5', 'Foo1|A1X158', 'HfsF|Q9A5M1', 'HfsE|Q9A5M2', 'HfsH|Q9A5L9', 'HfsG|Q9A5M0', 'OmpU|P0C6Q6', 'tpbB|A0A0H2Z7X0', 'sdrC|A0A6A8FED6', 'ompA|A0A3B6XXR4', 'yfiB|Q9I4L6', 'ompW|A0A0F4PBB9', 'sipW|P54506', 'ChiA|P32823', 'HfsC|Q9A5L8', 'HfaB|P27343', 'HfsA|Q9A5L6', 'SRFAD|Q08788']	6	hfs_hfacces_foo_chia_ompu_sdrc	adhesion_chitinase-production	2	1822244	Oleiphilus sp. HI0068
GCA_002698785.1	14	['SRFAA|P27206', 'SRFAB|Q04747', 'HfsD|Q9A5L5', 'HfsG|Q9A5M0', 'HfsE|Q9A5M2', 'HfsH|Q9A5L9', 'tpbB|A0A0H2Z7X0', 'sdrC|A0A6A8FED6', 'SRFAC|Q08787', 'yfiB|Q9I4L6', 'sipW|P54506', 'HfsC|Q9A5L8', 'HfsA|Q9A5L6', 'SRFAD|Q08788']	2	srf_sdrc	drag-reducing_adhesion	2	2026801	Verrucomicrobiales bacterium
GCA_000153485.2	16	['HfsD|Q9A5L5', 'HfsF|Q9A5M1', 'HfsE|Q9A5M2', 'HfsH|Q9A5L9', 'HfsG|Q9A5M0', 'tpbB|A0A0H2Z7X0', 'sdrC|A0A6A8FED6', 'yfiB|Q9I4L6', 'ompW|A0A0F4PBB9', 'sipW|P54506', 'RbmC|A0A2S1ZSI6', 'ChiA|P32823', 'HfsC|Q9A5L8', 'HfsA|Q9A5L6', 'Bap1|Q9KQW0', 'SRFAD|Q08788']	5	hfs_chia_sdrc_bap1_rbmc	adhesion_chitinase-production	2	313595	Psychroflexus torquis
GCA_007859325.1	16	['HfsD|Q9A5L5', 'OmpU|P0C6Q6', 'HfsF|Q9A5M1', 'HfsH|Q9A5L9', 'HfsG|Q9A5M0', 'tpbB|A0A0H2Z7X0', 'sdrC|A0A6A8FED6', 'ompA|A0A3B6XXR4', 'yfiB|Q9I4L6', 'ompW|A0A0F4PBB9', 'sipW|P54506', 'ChiA|P32823', 'HfsC|Q9A5L8', 'HfaB|P27343', 'HfsA|Q9A5L6', 'SRFAD|Q08788']	4	hfacces_chia_ompu_sdrc	adhesion_chitinase-production	2	488485	Luteimonas marina
GCA_003369575.1	12	['HfsD|Q9A5L5', 'HfsF|Q9A5M1', 'HfsH|Q9A5L9', 'HfsG|Q9A5M0', 'ompA|A0A3B6XXR4', 'yfiB|Q9I4L6', 'sipW|P54506', 'RbmC|A0A2S1ZSI6', 'ChiA|P32823', 'HfsA|Q9A5L6', 'Bap1|Q9KQW0', 'SRFAD|Q08788']	3	chia_bap1_rbmc	chitinase-production_adhesion	2	1229153	Oceanobacillus arenosus
GCA_002711615.1	15	['HfsD|Q9A5L5', 'HfsF|Q9A5M1', 'HfsE|Q9A5M2', 'HfsH|Q9A5L9', 'HfsG|Q9A5M0', 'tpbB|A0A0H2Z7X0', 'sdrC|A0A6A8FED6', 'ompA|A0A3B6XXR4', 'yfiB|Q9I4L6', 'sipW|P54506', 'ChiA|P32823', 'HfsC|Q9A5L8', 'HfaB|P27343', 'HfsA|Q9A5L6', 'SRFAD|Q08788']	4	hfs_hfacces_chia_sdrc	adhesion_chitinase-production	2	2026787	Rhodothermaceae bacterium
GCA_002702065.1	13	['HfsD|Q9A5L5', 'Foo1|A1X158', 'HfsF|Q9A5M1', 'HfsE|Q9A5M2', 'HfsH|Q9A5L9', 'HfsG|Q9A5M0', 'GalL|C0HLX7', 'sdrC|A0A6A8FED6', 'yfiB|Q9I4L6', 'sipW|P54506', 'HfsC|Q9A5L8', 'HfsA|Q9A5L6', 'SRFAD|Q08788']	4	hfs_foo_gal_sdrc	adhesion_colonization-resistance	2	2024896	Anaerolineaceae bacterium
GCA_002738205.1	21	['SRFAB|Q04747', 'ompA|A0A3B6XXR4', 'HfaB|P27343', 'SRFAA|P27206', 'OmpU|P0C6Q6', 'RbmC|A0A2S1ZSI6', 'Bap1|Q9KQW0', 'HfsD|Q9A5L5', 'HfsF|Q9A5M1', 'HfsE|Q9A5M2', 'HfsG|Q9A5M0', 'HfsH|Q9A5L9', 'SRFAC|Q08787', 'yfiB|Q9I4L6', 'sipW|P54506', 'HfsC|Q9A5L8', 'yfiR|Q9I4L4', 'HfsA|Q9A5L6', 'sdrC|A0A6A8FED6', 'GbpA|C3LW75', 'SRFAD|Q08788']	8	srf_hfs_hfacces_ompu_sdrc_bap1_rbmc_gbpa	drag-reducing_adhesion	2	2048971	Hahellaceae bacterium
GCA_002874745.1	17	['HfsD|Q9A5L5', 'OmpU|P0C6Q6', 'HfsG|Q9A5M0', 'HfsE|Q9A5M2', 'HfsH|Q9A5L9', 'tpbB|A0A0H2Z7X0', 'ompA|A0A3B6XXR4', 'yfiB|Q9I4L6', 'ompW|A0A0F4PBB9', 'GbpA|C3LW75', 'sipW|P54506', 'ChiA|P32823', 'HfsC|Q9A5L8', 'yfiR|Q9I4L4', 'HfaB|P27343', 'HfsA|Q9A5L6', 'SRFAD|Q08788']	5	hfacces_chia_yfi_ompu_gbpa	adhesion_chitinase-production	2	136468	Vibrio lentus
GCA_002706885.1	13	['HfsD|Q9A5L5', 'HfsF|Q9A5M1', 'HfsE|Q9A5M2', 'HfsH|Q9A5L9', 'HfsG|Q9A5M0', 'sdrC|A0A6A8FED6', 'ompA|A0A3B6XXR4', 'yfiB|Q9I4L6', 'sipW|P54506', 'ChiA|P32823', 'HfsC|Q9A5L8', 'HfsA|Q9A5L6', 'SRFAD|Q08788']	3	hfs_chia_sdrc	adhesion_chitinase-production	2	2026778	Phycisphaerae bacterium
GCA_002119585.1	17	['HfsD|Q9A5L5', 'OmpU|P0C6Q6', 'HfsF|Q9A5M1', 'HfsE|Q9A5M2', 'HfsH|Q9A5L9', 'HfsG|Q9A5M0', 'tpbB|A0A0H2Z7X0', 'ompA|A0A3B6XXR4', 'yfiB|Q9I4L6', 'ompW|A0A0F4PBB9', 'GbpA|C3LW75', 'sipW|P54506', 'ChiA|P32823', 'HfsC|Q9A5L8', 'HfaB|P27343', 'HfsA|Q9A5L6', 'SRFAD|Q08788']	5	hfs_hfacces_chia_ompu_gbpa	adhesion_chitinase-production	2	663	Vibrio alginolyticus
GCA_001302805.1	10	['HfsD|Q9A5L5', 'HfsF|Q9A5M1', 'HfsG|Q9A5M0', 'sdrC|A0A6A8FED6', 'tpbB|A0A0H2Z7X0', 'sipW|P54506', 'RbmC|A0A2S1ZSI6', 'ChiA|P32823', 'HfsC|Q9A5L8', 'Bap1|Q9KQW0']	4	chia_sdrc_bap1_rbmc	chitinase-production_adhesion	2	1704032	candidate division KD3-62 bacterium DG_56
GCA_002706985.1	15	['SRFAA|P27206', 'SRFAB|Q04747', 'HfsD|Q9A5L5', 'OmpU|P0C6Q6', 'HfsF|Q9A5M1', 'HfsG|Q9A5M0', 'HfsH|Q9A5L9', 'ompA|A0A3B6XXR4', 'SRFAC|Q08787', 'yfiB|Q9I4L6', 'sipW|P54506', 'RbmC|A0A2S1ZSI6', 'HfaB|P27343', 'Bap1|Q9KQW0', 'SRFAD|Q08788']	5	srf_hfacces_ompu_bap1_rbmc	drag-reducing_adhesion	2	1964365	Sneathiella sp.
GCA_013376415.1	13	['HfsD|Q9A5L5', 'Foo1|A1X158', 'HfsG|Q9A5M0', 'HfsH|Q9A5L9', 'ompA|A0A3B6XXR4', 'tpbB|A0A0H2Z7X0', 'yfiB|Q9I4L6', 'ompW|A0A0F4PBB9', 'sipW|P54506', 'ChiA|P32823', 'HfsC|Q9A5L8', 'HfsA|Q9A5L6', 'SRFAD|Q08788']	2	foo_chia	adhesion_chitinase-production	2	2697365	Muricauda chongwuensis
GCA_002722315.1	14	['HfsD|Q9A5L5', 'Foo1|A1X158', 'HfsF|Q9A5M1', 'HfsG|Q9A5M0', 'OmpU|P0C6Q6', 'ompA|A0A3B6XXR4', 'yfiB|Q9I4L6', 'ompW|A0A0F4PBB9', 'sipW|P54506', 'ChiA|P32823', 'HfsC|Q9A5L8', 'HfaB|P27343', 'HfsA|Q9A5L6', 'SRFAD|Q08788']	4	hfacces_foo_chia_ompu	adhesion_chitinase-production	2	2006849	Xanthomonadales bacterium
GCA_002719595.1	10	['HfsD|Q9A5L5', 'OmpU|P0C6Q6', 'HfsF|Q9A5M1', 'HfsE|Q9A5M2', 'HfsG|Q9A5M0', 'sdrC|A0A6A8FED6', 'ompA|A0A3B6XXR4', 'SRFAC|Q08787', 'yfiB|Q9I4L6', 'ChiA|P32823']	3	chia_ompu_sdrc	chitinase-production_adhesion	2	2026801	Verrucomicrobiales bacterium
GCA_009867075.1	22	['SRFAB|Q04747', 'CHPC|Q9AD93', 'Foo1|A1X158', 'ompA|A0A3B6XXR4', 'CHPE|Q9X9Z2', 'SRFAA|P27206', 'CHPG|Q9KYH3', 'CHPA|Q8CJY7', 'HfsD|Q9A5L5', 'HfsF|Q9A5M1', 'HfsG|Q9A5M0', 'HfsH|Q9A5L9', 'SRFAC|Q08787', 'yfiB|Q9I4L6', 'CHPF|Q9KYG7', 'CHPH|Q9AD92', 'sipW|P54506', 'CHPB|Q9X7U2', 'sdrC|A0A6A8FED6', 'CHPD|Q9L1J9', 'GbpA|C3LW75', 'SRFAD|Q08788']	5	srf_chp_foo_sdrc_gbpa	drag-reducing_adhesion	2	2175864	Streptomyces sp. NHF165
GCA_014077095.1	18	['HfsD|Q9A5L5', 'OmpU|P0C6Q6', 'HfsF|Q9A5M1', 'HfsE|Q9A5M2', 'HfsH|Q9A5L9', 'HfsG|Q9A5M0', 'tpbB|A0A0H2Z7X0', 'sdrC|A0A6A8FED6', 'ompA|A0A3B6XXR4', 'yfiB|Q9I4L6', 'pilF|A0A290TXQ9', 'sipW|P54506', 'ChiA|P32823', 'HfsC|Q9A5L8', 'yfiR|Q9I4L4', 'HfaB|P27343', 'HfsA|Q9A5L6', 'SRFAD|Q08788']	6	hfs_hfacces_chia_yfi_ompu_sdrc	adhesion_chitinase-production	2	2759824	Colwellia sp. MB02u-6
GCA_014076925.1	18	['HfsD|Q9A5L5', 'Foo1|A1X158', 'HfsF|Q9A5M1', 'HfsH|Q9A5L9', 'HfsG|Q9A5M0', 'OmpU|P0C6Q6', 'sdrC|A0A6A8FED6', 'yfiB|Q9I4L6', 'ompW|A0A0F4PBB9', 'GbpA|C3LW75', 'pilF|A0A290TXQ9', 'sipW|P54506', 'ChiA|P32823', 'HfsC|Q9A5L8', 'yfiR|Q9I4L4', 'HfaB|P27343', 'HfsA|Q9A5L6', 'SRFAD|Q08788']	6	hfacces_foo_chia_ompu_sdrc_gbpa	adhesion_chitinase-production	2	2759816	Colwellia sp. MB02u-11
GCA_001303805.1	12	['HfsD|Q9A5L5', 'OmpU|P0C6Q6', 'HfsF|Q9A5M1', 'HfsG|Q9A5M0', 'sdrC|A0A6A8FED6', 'yfiB|Q9I4L6', 'sipW|P54506', 'RbmC|A0A2S1ZSI6', 'ChiA|P32823', 'HfsC|Q9A5L8', 'HfsA|Q9A5L6', 'Bap1|Q9KQW0']	5	chia_ompu_sdrc_bap1_rbmc	chitinase-production_adhesion	2	1703780	candidate division WOR_3 bacterium SM23_60
GCA_002726935.1	14	['HfsD|Q9A5L5', 'HfsF|Q9A5M1', 'HfsE|Q9A5M2', 'HfsG|Q9A5M0', 'HfsH|Q9A5L9', 'tpbB|A0A0H2Z7X0', 'ompA|A0A3B6XXR4', 'SRFAC|Q08787', 'yfiB|Q9I4L6', 'sipW|P54506', 'ChiA|P32823', 'HfsC|Q9A5L8', 'HfsA|Q9A5L6', 'SRFAD|Q08788']	2	hfs_chia	adhesion_chitinase-production	2	2026720	Candidatus Saccharibacteria bacterium
GCA_900167435.1	26	['SRFAB|Q04747', 'CHPC|Q9AD93', 'ompA|A0A3B6XXR4', 'CHPE|Q9X9Z2', 'SRFAA|P27206', 'CHPG|Q9KYH3', 'RbmC|A0A2S1ZSI6', 'Bap1|Q9KQW0', 'CHPA|Q8CJY7', 'HfsD|Q9A5L5', 'HfsF|Q9A5M1', 'HfsE|Q9A5M2', 'HfsG|Q9A5M0', 'HfsH|Q9A5L9', 'SRFAC|Q08787', 'yfiB|Q9I4L6', 'CHPF|Q9KYG7', 'CHPH|Q9AD92', 'sipW|P54506', 'HfsC|Q9A5L8', 'HfsA|Q9A5L6', 'CHPB|Q9X7U2', 'sdrC|A0A6A8FED6', 'CHPD|Q9L1J9', 'GbpA|C3LW75', 'SRFAD|Q…	7	srf_hfs_chp_sdrc_bap1_rbmc_gbpa	drag-reducing_adhesion	2	1122192	Marinactinospora thermotolerans
GCA_002729845.1	12	['OmpU|P0C6Q6', 'HfsF|Q9A5M1', 'HfsG|Q9A5M0', 'sdrC|A0A6A8FED6', 'ompA|A0A3B6XXR4', 'yfiB|Q9I4L6', 'ompW|A0A0F4PBB9', 'sipW|P54506', 'RbmC|A0A2S1ZSI6', 'ChiA|P32823', 'Bap1|Q9KQW0', 'SRFAD|Q08788']	5	chia_ompu_sdrc_bap1_rbmc	chitinase-production_adhesion	2	1872427	Alcanivorax sp.
GCA_002726945.1	11	['HfsD|Q9A5L5', 'HfsF|Q9A5M1', 'HfsE|Q9A5M2', 'HfsH|Q9A5L9', 'HfsG|Q9A5M0', 'yfiB|Q9I4L6', 'sipW|P54506', 'ChiA|P32823', 'HfsC|Q9A5L8', 'HfaB|P27343', 'SRFAD|Q08788']	2	hfacces_chia	adhesion_chitinase-production	2	2026735	Deltaproteobacteria bacterium
GCA_002709825.1	16	['SRFAA|P27206', 'SRFAB|Q04747', 'HfsD|Q9A5L5', 'Foo1|A1X158', 'HfsG|Q9A5M0', 'HfsE|Q9A5M2', 'HfsH|Q9A5L9', 'OmpU|P0C6Q6', 'ompA|A0A3B6XXR4', 'yfiB|Q9I4L6', 'ompW|A0A0F4PBB9', 'sipW|P54506', 'ChiA|P32823', 'HfsC|Q9A5L8', 'HfsA|Q9A5L6', 'SRFAD|Q08788']	3	foo_chia_ompu	adhesion_chitinase-production	2	2006849	Xanthomonadales bacterium
GCA_002726335.1	16	['SRFAA|P27206', 'SRFAB|Q04747', 'HfsD|Q9A5L5', 'OmpU|P0C6Q6', 'HfsF|Q9A5M1', 'HfsE|Q9A5M2', 'HfsG|Q9A5M0', 'HfsH|Q9A5L9', 'sdrC|A0A6A8FED6', 'yfiB|Q9I4L6', 'sipW|P54506', 'ChiA|P32823', 'HfsC|Q9A5L8', 'HfaB|P27343', 'HfsA|Q9A5L6', 'SRFAD|Q08788']	5	hfs_hfacces_chia_ompu_sdrc	adhesion_chitinase-production	2	2026741	Gemmatimonadaceae bacterium
GCA_002693685.1	16	['HfsD|Q9A5L5', 'HfsF|Q9A5M1', 'HfsE|Q9A5M2', 'HfsH|Q9A5L9', 'HfsG|Q9A5M0', 'tpbB|A0A0H2Z7X0', 'sdrC|A0A6A8FED6', 'yfiB|Q9I4L6', 'sipW|P54506', 'RbmC|A0A2S1ZSI6', 'ChiA|P32823', 'HfsC|Q9A5L8', 'HfaB|P27343', 'HfsA|Q9A5L6', 'Bap1|Q9KQW0', 'SRFAD|Q08788']	6	hfs_hfacces_chia_sdrc_bap1_rbmc	adhesion_chitinase-production	2	1977054	Leeuwenhoekiella sp.
GCA_014117385.1	19	['Foo1|A1X158', 'ompA|A0A3B6XXR4', 'HfaB|P27343', 'OmpU|P0C6Q6', 'ompW|A0A0F4PBB9', 'RbmC|A0A2S1ZSI6', 'Bap1|Q9KQW0', 'HfsD|Q9A5L5', 'HfsG|Q9A5M0', 'HfsH|Q9A5L9', 'yfiB|Q9I4L6', 'sipW|P54506', 'ChiA|P32823', 'HfsC|Q9A5L8', 'yfiR|Q9I4L4', 'HfsA|Q9A5L6', 'sdrC|A0A6A8FED6', 'GbpA|C3LW75', 'SRFAD|Q08788']	8	hfacces_foo_chia_ompu_sdrc_bap1_rbmc_gbpa	adhesion_chitinase-production	2	2759705	Pseudoalteromonas sp. MT33b
GCA_000166295.1	15	['HfsD|Q9A5L5', 'OmpU|P0C6Q6', 'HfsG|Q9A5M0', 'HfsE|Q9A5M2', 'HfsH|Q9A5L9', 'tpbB|A0A0H2Z7X0', 'sdrC|A0A6A8FED6', 'ompA|A0A3B6XXR4', 'yfiB|Q9I4L6', 'ompW|A0A0F4PBB9', 'sipW|P54506', 'ChiA|P32823', 'HfsC|Q9A5L8', 'HfsA|Q9A5L6', 'SRFAD|Q08788']	3	chia_ompu_sdrc	chitinase-production_adhesion	2	225937	Marinobacter adhaerens
GCA_000158115.1	19	['ompA|A0A3B6XXR4', 'HfaB|P27343', 'OmpU|P0C6Q6', 'tpbB|A0A0H2Z7X0', 'RbmC|A0A2S1ZSI6', 'Bap1|Q9KQW0', 'HfsD|Q9A5L5', 'HfsF|Q9A5M1', 'HfsE|Q9A5M2', 'HfsG|Q9A5M0', 'yfiB|Q9I4L6', 'sipW|P54506', 'ChiA|P32823', 'HfsC|Q9A5L8', 'yfiR|Q9I4L4', 'HfsA|Q9A5L6', 'sdrC|A0A6A8FED6', 'GbpA|C3LW75', 'SRFAD|Q08788']	8	hfacces_chia_yfi_ompu_sdrc_bap1_rbmc_gbpa	adhesion_chitinase-production	2	391586	Vibrio sp. 16
GCA_002093115.1	13	['HfsD|Q9A5L5', 'OmpU|P0C6Q6', 'HfsF|Q9A5M1', 'HfsH|Q9A5L9', 'HfsG|Q9A5M0', 'sdrC|A0A6A8FED6', 'yfiB|Q9I4L6', 'sipW|P54506', 'ChiA|P32823', 'HfsC|Q9A5L8', 'yfiR|Q9I4L4', 'HfsA|Q9A5L6', 'SRFAD|Q08788']	3	chia_ompu_sdrc	chitinase-production_adhesion	2	1969733	Geothermobacter hydrogeniphilus
GCA_014164055.1	12	['HfsD|Q9A5L5', 'OmpU|P0C6Q6', 'HfsG|Q9A5M0', 'yfiB|Q9I4L6', 'ompW|A0A0F4PBB9', 'RbmC|A0A2S1ZSI6', 'ChiA|P32823', 'yfiR|Q9I4L4', 'HfaB|P27343', 'HfsA|Q9A5L6', 'Bap1|Q9KQW0', 'SRFAD|Q08788']	5	hfacces_chia_ompu_bap1_rbmc	adhesion_chitinase-production	2	2760951	Shewanella sp. SR41-2
GCA_000740745.1	14	['HfsD|Q9A5L5', 'OmpU|P0C6Q6', 'HfsF|Q9A5M1', 'HfsE|Q9A5M2', 'HfsH|Q9A5L9', 'HfsG|Q9A5M0', 'yfiB|Q9I4L6', 'ompW|A0A0F4PBB9', 'sipW|P54506', 'ChiA|P32823', 'HfsC|Q9A5L8', 'yfiR|Q9I4L4', 'HfsA|Q9A5L6', 'SRFAD|Q08788']	3	hfs_chia_ompu	adhesion_chitinase-production	2	314279	Nitrosococcus oceani
GCA_005930855.1	19	['Foo1|A1X158', 'ompA|A0A3B6XXR4', 'HfaB|P27343', 'OmpU|P0C6Q6', 'tpbB|A0A0H2Z7X0', 'ompW|A0A0F4PBB9', 'pilF|A0A290TXQ9', 'HfsD|Q9A5L5', 'HfsG|Q9A5M0', 'HfsE|Q9A5M2', 'HfsH|Q9A5L9', 'yfiB|Q9I4L6', 'sipW|P54506', 'ChiA|P32823', 'HfsC|Q9A5L8', 'yfiR|Q9I4L4', 'HfsA|Q9A5L6', 'GbpA|C3LW75', 'SRFAD|Q08788']	7	hfacces_foo_chia_omp_yfi_ompu_gbpa	adhesion_chitinase-production	2	579571	Pseudoalteromonas sp. S980
GCA_002708795.1	12	['HfsD|Q9A5L5', 'OmpU|P0C6Q6', 'HfsF|Q9A5M1', 'HfsE|Q9A5M2', 'HfsH|Q9A5L9', 'HfsG|Q9A5M0', 'yfiB|Q9I4L6', 'sipW|P54506', 'ChiA|P32823', 'HfsC|Q9A5L8', 'HfsA|Q9A5L6', 'SRFAD|Q08788']	3	hfs_chia_ompu	adhesion_chitinase-production	2	267	Paracoccus sp.
GCA_001304445.1	11	['HfsD|Q9A5L5', 'HfsF|Q9A5M1', 'HfsH|Q9A5L9', 'HfsG|Q9A5M0', 'tpbB|A0A0H2Z7X0', 'sdrC|A0A6A8FED6', 'yfiB|Q9I4L6', 'sipW|P54506', 'ChiA|P32823', 'HfsC|Q9A5L8', 'SRFAD|Q08788']	2	chia_sdrc	chitinase-production_adhesion	2	1703383	Acidithiobacillales bacterium SG8_45
GCA_002727035.1	18	['SRFAA|P27206', 'SRFAB|Q04747', 'HfsD|Q9A5L5', 'Foo1|A1X158', 'HfsF|Q9A5M1', 'HfsE|Q9A5M2', 'HfsG|Q9A5M0', 'HfsH|Q9A5L9', 'SRFAC|Q08787', 'yfiB|Q9I4L6', 'ompW|A0A0F4PBB9', 'sipW|P54506', 'RbmC|A0A2S1ZSI6', 'HfsC|Q9A5L8', 'HfaB|P27343', 'HfsA|Q9A5L6', 'Bap1|Q9KQW0', 'SRFAD|Q08788']	6	srf_hfs_hfacces_foo_bap1_rbmc	drag-reducing_adhesion	2	409	Methylobacterium sp.
GCA_009735555.1	17	['HfsD|Q9A5L5', 'Foo1|A1X158', 'HfsF|Q9A5M1', 'HfsE|Q9A5M2', 'HfsH|Q9A5L9', 'HfsG|Q9A5M0', 'tpbB|A0A0H2Z7X0', 'sdrC|A0A6A8FED6', 'ompA|A0A3B6XXR4', 'yfiB|Q9I4L6', 'ompW|A0A0F4PBB9', 'sipW|P54506', 'ChiA|P32823', 'HfsC|Q9A5L8', 'HfaB|P27343', 'HfsA|Q9A5L6', 'SRFAD|Q08788']	5	hfs_hfacces_foo_chia_sdrc	adhesion_chitinase-production	2	2686357	Labilibaculum euxinus
GCA_001458195.1	12	['HfsD|Q9A5L5', 'OmpU|P0C6Q6', 'HfsF|Q9A5M1', 'HfsE|Q9A5M2', 'HfsH|Q9A5L9', 'HfsG|Q9A5M0', 'yfiB|Q9I4L6', 'ompW|A0A0F4PBB9', 'sipW|P54506', 'ChiA|P32823', 'HfsC|Q9A5L8', 'SRFAD|Q08788']	2	chia_ompu	chitinase-production_adhesion	2	81569	Ruegeria atlantica
GCA_900114595.1	16	['HfsD|Q9A5L5', 'OmpU|P0C6Q6', 'HfsF|Q9A5M1', 'HfsE|Q9A5M2', 'HfsH|Q9A5L9', 'HfsG|Q9A5M0', 'tpbB|A0A0H2Z7X0', 'ompA|A0A3B6XXR4', 'yfiB|Q9I4L6', 'sipW|P54506', 'RbmC|A0A2S1ZSI6', 'ChiA|P32823', 'HfsC|Q9A5L8', 'HfaB|P27343', 'HfsA|Q9A5L6', 'Bap1|Q9KQW0']	6	hfs_hfacces_chia_ompu_bap1_rbmc	adhesion_chitinase-production	2	52561	Desulfomicrobium norvegicum
GCA_011806405.1	11	['HfsD|Q9A5L5', 'OmpU|P0C6Q6', 'HfsF|Q9A5M1', 'HfsH|Q9A5L9', 'HfsG|Q9A5M0', 'yfiB|Q9I4L6', 'ompW|A0A0F4PBB9', 'sipW|P54506', 'ChiA|P32823', 'HfsA|Q9A5L6', 'SRFAD|Q08788']	2	chia_ompu	chitinase-production_adhesion	2	2721560	Pseudooceanicola sp. HF7
GCA_002729295.1	10	['HfsD|Q9A5L5', 'Foo1|A1X158', 'HfsF|Q9A5M1', 'HfsH|Q9A5L9', 'HfsG|Q9A5M0', 'yfiB|Q9I4L6', 'sipW|P54506', 'ChiA|P32823', 'HfsC|Q9A5L8', 'HfsA|Q9A5L6']	2	foo_chia	adhesion_chitinase-production	2	2026801	Verrucomicrobiales bacterium
GCA_014349155.1	16	['SRFAA|P27206', 'SRFAB|Q04747', 'HfsD|Q9A5L5', 'HfsG|Q9A5M0', 'HfsE|Q9A5M2', 'HfsH|Q9A5L9', 'tpbB|A0A0H2Z7X0', 'sdrC|A0A6A8FED6', 'ompA|A0A3B6XXR4', 'SRFAC|Q08787', 'yfiB|Q9I4L6', 'sipW|P54506', 'HfsC|Q9A5L8', 'HfaB|P27343', 'HfsA|Q9A5L6', 'SRFAD|Q08788']	3	srf_hfacces_sdrc	drag-reducing_adhesion	2	1517758	Lewinella lacunae
GCA_002149085.1	17	['HfsD|Q9A5L5', 'OmpU|P0C6Q6', 'HfsF|Q9A5M1', 'HfsE|Q9A5M2', 'HfsH|Q9A5L9', 'HfsG|Q9A5M0', 'tpbB|A0A0H2Z7X0', 'ompA|A0A3B6XXR4', 'yfiB|Q9I4L6', 'ompW|A0A0F4PBB9', 'GbpA|C3LW75', 'sipW|P54506', 'ChiA|P32823', 'HfsC|Q9A5L8', 'HfaB|P27343', 'HfsA|Q9A5L6', 'SRFAD|Q08788']	5	hfs_hfacces_chia_ompu_gbpa	adhesion_chitinase-production	2	663	Vibrio alginolyticus
GCA_002873045.1	17	['HfsD|Q9A5L5', 'OmpU|P0C6Q6', 'HfsF|Q9A5M1', 'HfsH|Q9A5L9', 'HfsG|Q9A5M0', 'tpbB|A0A0H2Z7X0', 'ompA|A0A3B6XXR4', 'yfiB|Q9I4L6', 'ompW|A0A0F4PBB9', 'GbpA|C3LW75', 'sipW|P54506', 'ChiA|P32823', 'HfsC|Q9A5L8', 'yfiR|Q9I4L4', 'HfaB|P27343', 'HfsA|Q9A5L6', 'SRFAD|Q08788']	5	hfacces_chia_yfi_ompu_gbpa	adhesion_chitinase-production	2	1884477	Vibrio sp. 10N.286.46.E10
GCA_002715105.1	14	['HfsD|Q9A5L5', 'HfsF|Q9A5M1', 'HfsE|Q9A5M2', 'HfsH|Q9A5L9', 'HfsG|Q9A5M0', 'tpbB|A0A0H2Z7X0', 'sdrC|A0A6A8FED6', 'yfiB|Q9I4L6', 'ompW|A0A0F4PBB9', 'sipW|P54506', 'ChiA|P32823', 'HfsC|Q9A5L8', 'HfsA|Q9A5L6', 'SRFAD|Q08788']	3	hfs_chia_sdrc	adhesion_chitinase-production	2	2024824	Balneola sp.
GCA_002954645.1	16	['HfsD|Q9A5L5', 'OmpU|P0C6Q6', 'HfsF|Q9A5M1', 'HfsE|Q9A5M2', 'HfsH|Q9A5L9', 'HfsG|Q9A5M0', 'tpbB|A0A0H2Z7X0', 'sdrC|A0A6A8FED6', 'ompA|A0A3B6XXR4', 'yfiB|Q9I4L6', 'ompW|A0A0F4PBB9', 'sipW|P54506', 'ChiA|P32823', 'HfsC|Q9A5L8', 'HfsA|Q9A5L6', 'SRFAD|Q08788']	4	hfs_chia_ompu_sdrc	adhesion_chitinase-production	2	574710	Polaribacter gangjinensis
GCA_002731695.1	14	['HfsD|Q9A5L5', 'Foo1|A1X158', 'HfsF|Q9A5M1', 'HfsE|Q9A5M2', 'HfsH|Q9A5L9', 'HfsG|Q9A5M0', 'yfiB|Q9I4L6', 'sipW|P54506', 'RbmC|A0A2S1ZSI6', 'ChiA|P32823', 'HfsC|Q9A5L8', 'HfsA|Q9A5L6', 'Bap1|Q9KQW0', 'SRFAD|Q08788']	5	hfs_foo_chia_bap1_rbmc	adhesion_chitinase-production	2	2026782	Porticoccaceae bacterium
GCA_014077215.1	17	['HfsD|Q9A5L5', 'OmpU|P0C6Q6', 'HfsF|Q9A5M1', 'HfsH|Q9A5L9', 'HfsG|Q9A5M0', 'tpbB|A0A0H2Z7X0', 'sdrC|A0A6A8FED6', 'ompA|A0A3B6XXR4', 'yfiB|Q9I4L6', 'ompW|A0A0F4PBB9', 'pilF|A0A290TXQ9', 'sipW|P54506', 'ChiA|P32823', 'HfsC|Q9A5L8', 'HfaB|P27343', 'HfsA|Q9A5L6', 'SRFAD|Q08788']	5	hfacces_chia_omp_ompu_sdrc	adhesion_chitinase-production	2	2759829	Colwellia sp. MB02u-1
GCA_001632045.1	10	['HfsF|Q9A5M1', 'HfsE|Q9A5M2', 'HfsG|Q9A5M0', 'tpbB|A0A0H2Z7X0', 'yfiB|Q9I4L6', 'sipW|P54506', 'ChiA|P32823', 'HfsC|Q9A5L8', 'HfaB|P27343', 'SRFAD|Q08788']	2	hfacces_chia	adhesion_chitinase-production	2	1801622	Prochlorococcus marinus
GCA_014077125.1	17	['HfsD|Q9A5L5', 'OmpU|P0C6Q6', 'HfsF|Q9A5M1', 'HfsH|Q9A5L9', 'HfsG|Q9A5M0', 'tpbB|A0A0H2Z7X0', 'sdrC|A0A6A8FED6', 'ompA|A0A3B6XXR4', 'yfiB|Q9I4L6', 'ompW|A0A0F4PBB9', 'pilF|A0A290TXQ9', 'sipW|P54506', 'ChiA|P32823', 'HfsC|Q9A5L8', 'HfaB|P27343', 'HfsA|Q9A5L6', 'SRFAD|Q08788']	5	hfacces_chia_omp_ompu_sdrc	adhesion_chitinase-production	2	2759826	Colwellia sp. MB02u-18
GCA_900129165.1	14	['HfsD|Q9A5L5', 'Foo1|A1X158', 'HfsF|Q9A5M1', 'HfsE|Q9A5M2', 'HfsH|Q9A5L9', 'HfsG|Q9A5M0', 'tpbB|A0A0H2Z7X0', 'ompA|A0A3B6XXR4', 'yfiB|Q9I4L6', 'sipW|P54506', 'RbmC|A0A2S1ZSI6', 'ChiA|P32823', 'HfsC|Q9A5L8', 'Bap1|Q9KQW0']	4	foo_chia_bap1_rbmc	adhesion_chitinase-production	2	991789	Anaerotignum propionicum
GCA_000213655.1	21	['Foo1|A1X158', 'ompA|A0A3B6XXR4', 'OmpU|P0C6Q6', 'tpbB|A0A0H2Z7X0', 'ompW|A0A0F4PBB9', 'pilF|A0A290TXQ9', 'HfsD|Q9A5L5', 'HfsF|Q9A5M1', 'HfsE|Q9A5M2', 'HfsH|Q9A5L9', 'HfsG|Q9A5M0', 'tasA|P54507', 'yfiB|Q9I4L6', 'sipW|P54506', 'ChiA|P32823', 'HfsC|Q9A5L8', 'yfiR|Q9I4L4', 'HfsA|Q9A5L6', 'sdrC|A0A6A8FED6', 'GbpA|C3LW75', 'SRFAD|Q08788']	9	hfs_foo_chia_tapA_omp_yfi_ompu_sdrc_gbpa	adhesion_chitinase-production	2	715451	Alteromonas naphthalenivorans
GCA_002715365.1	14	['HfsD|Q9A5L5', 'Foo1|A1X158', 'HfsF|Q9A5M1', 'HfsH|Q9A5L9', 'HfsG|Q9A5M0', 'yfiB|Q9I4L6', 'sipW|P54506', 'RbmC|A0A2S1ZSI6', 'ChiA|P32823', 'HfsC|Q9A5L8', 'HfaB|P27343', 'HfsA|Q9A5L6', 'Bap1|Q9KQW0', 'SRFAD|Q08788']	5	hfacces_foo_chia_bap1_rbmc	adhesion_chitinase-production	2	2026763	Myxococcales bacterium
GCA_900114125.1	15	['SRFAA|P27206', 'SRFAB|Q04747', 'HfsD|Q9A5L5', 'Foo1|A1X158', 'HfsF|Q9A5M1', 'HfsG|Q9A5M0', 'OmpU|P0C6Q6', 'sdrC|A0A6A8FED6', 'ompA|A0A3B6XXR4', 'SRFAC|Q08787', 'yfiB|Q9I4L6', 'sipW|P54506', 'HfsC|Q9A5L8', 'HfsA|Q9A5L6', 'SRFAD|Q08788']	4	srf_foo_ompu_sdrc	drag-reducing_adhesion	2	1122600	Nereida ignava
GCA_002696485.1	15	['HfsD|Q9A5L5', 'HfsF|Q9A5M1', 'HfsE|Q9A5M2', 'HfsH|Q9A5L9', 'HfsG|Q9A5M0', 'tpbB|A0A0H2Z7X0', 'tasA|P54507', 'sdrC|A0A6A8FED6', 'yfiB|Q9I4L6', 'sipW|P54506', 'ChiA|P32823', 'HfsC|Q9A5L8', 'HfaB|P27343', 'HfsA|Q9A5L6', 'SRFAD|Q08788']	5	hfs_hfacces_chia_tapA_sdrc	adhesion_chitinase-production	2	2024823	Altibacter sp.
GCA_002710725.1	14	['HfsD|Q9A5L5', 'OmpU|P0C6Q6', 'HfsF|Q9A5M1', 'HfsH|Q9A5L9', 'HfsG|Q9A5M0', 'sdrC|A0A6A8FED6', 'ompA|A0A3B6XXR4', 'yfiB|Q9I4L6', 'sipW|P54506', 'ChiA|P32823', 'HfsC|Q9A5L8', 'HfaB|P27343', 'HfsA|Q9A5L6', 'SRFAD|Q08788']	4	hfacces_chia_ompu_sdrc	adhesion_chitinase-production	2	2026793	Spongiibacteraceae bacterium
GCA_002731335.1	18	['HfsD|Q9A5L5', 'Foo1|A1X158', 'HfsF|Q9A5M1', 'HfsH|Q9A5L9', 'HfsG|Q9A5M0', 'OmpU|P0C6Q6', 'sdrC|A0A6A8FED6', 'ompA|A0A3B6XXR4', 'yfiB|Q9I4L6', 'ompW|A0A0F4PBB9', 'sipW|P54506', 'RbmC|A0A2S1ZSI6', 'ChiA|P32823', 'HfsC|Q9A5L8', 'HfaB|P27343', 'HfsA|Q9A5L6', 'Bap1|Q9KQW0', 'SRFAD|Q08788']	7	hfacces_foo_chia_ompu_sdrc_bap1_rbmc	adhesion_chitinase-production	2	1872427	Alcanivorax sp.
GCA_000153065.1	9	['HfsD|Q9A5L5', 'Foo1|A1X158', 'HfsF|Q9A5M1', 'HfsG|Q9A5M0', 'sipW|P54506', 'ChiA|P32823', 'HfsC|Q9A5L8', 'HfsA|Q9A5L6', 'SRFAD|Q08788']	2	foo_chia	adhesion_chitinase-production	2	221360	Synechococcus sp. RS9917
GCA_009363315.1	15	['SRFAA|P27206', 'SRFAB|Q04747', 'HfsD|Q9A5L5', 'Foo1|A1X158', 'HfsF|Q9A5M1', 'HfsE|Q9A5M2', 'HfsG|Q9A5M0', 'HfsH|Q9A5L9', 'tpbB|A0A0H2Z7X0', 'SRFAC|Q08787', 'yfiB|Q9I4L6', 'sipW|P54506', 'HfsC|Q9A5L8', 'HfsA|Q9A5L6', 'SRFAD|Q08788']	3	srf_hfs_foo	drag-reducing_adhesion	2	2587867	Labrenzia sp. THAF191b
GCA_001403915.1	15	['SRFAA|P27206', 'SRFAB|Q04747', 'HfsD|Q9A5L5', 'Foo1|A1X158', 'HfsF|Q9A5M1', 'HfsE|Q9A5M2', 'HfsG|Q9A5M0', 'HfsH|Q9A5L9', 'tpbB|A0A0H2Z7X0', 'SRFAC|Q08787', 'yfiB|Q9I4L6', 'sipW|P54506', 'HfsC|Q9A5L8', 'HfsA|Q9A5L6', 'SRFAD|Q08788']	3	srf_hfs_foo	drag-reducing_adhesion	2	187304	Roseibium aggregatum
GCA_002725515.1	10	['SRFAA|P27206', 'SRFAB|Q04747', 'HfsG|Q9A5M0', 'HfsH|Q9A5L9', 'ompA|A0A3B6XXR4', 'tpbB|A0A0H2Z7X0', 'ChiA|P32823', 'HfaB|P27343', 'HfsA|Q9A5L6', 'pilF|A0A290TXQ9']	2	hfacces_chia	adhesion_chitinase-production	2	2026734	Dehalococcoidia bacterium
GCA_000348905.1	9	['HfsD|Q9A5L5', 'HfsF|Q9A5M1', 'HfsH|Q9A5L9', 'HfsG|Q9A5M0', 'sdrC|A0A6A8FED6', 'sipW|P54506', 'ChiA|P32823', 'HfsA|Q9A5L6', 'SRFAD|Q08788']	2	chia_sdrc	chitinase-production_adhesion	2	1235279	Bhargavaea cecembensis
GCA_001302785.1	13	['HfsD|Q9A5L5', 'HfsF|Q9A5M1', 'HfsH|Q9A5L9', 'HfsG|Q9A5M0', 'sdrC|A0A6A8FED6', 'ompA|A0A3B6XXR4', 'ompW|A0A0F4PBB9', 'RbmC|A0A2S1ZSI6', 'ChiA|P32823', 'HfsC|Q9A5L8', 'HfaB|P27343', 'HfsA|Q9A5L6', 'Bap1|Q9KQW0']	5	hfacces_chia_sdrc_bap1_rbmc	adhesion_chitinase-production	2	1703775	candidate division WOR-1 bacterium DG_54_3
GCA_012395805.1	15	['SRFAA|P27206', 'SRFAB|Q04747', 'HfsD|Q9A5L5', 'Foo1|A1X158', 'HfsF|Q9A5M1', 'HfsE|Q9A5M2', 'HfsG|Q9A5M0', 'HfsH|Q9A5L9', 'tpbB|A0A0H2Z7X0', 'SRFAC|Q08787', 'yfiB|Q9I4L6', 'sipW|P54506', 'HfsC|Q9A5L8', 'HfsA|Q9A5L6', 'SRFAD|Q08788']	3	srf_hfs_foo	drag-reducing_adhesion	2	2723402	Labrenzia sp. 5N
GCA_001050835.1	13	['SRFAA|P27206', 'SRFAB|Q04747', 'HfsD|Q9A5L5', 'HfsG|Q9A5M0', 'HfsH|Q9A5L9', 'ompA|A0A3B6XXR4', 'yfiB|Q9I4L6', 'sipW|P54506', 'RbmC|A0A2S1ZSI6', 'ChiA|P32823', 'HfsC|Q9A5L8', 'Bap1|Q9KQW0', 'SRFAD|Q08788']	3	chia_bap1_rbmc	chitinase-production_adhesion	2	423472	Crocosphaera watsonii
GCA_002695785.1	21	['SRFAB|Q04747', 'Foo1|A1X158', 'ompA|A0A3B6XXR4', 'SRFAA|P27206', 'OmpU|P0C6Q6', 'tpbB|A0A0H2Z7X0', 'ompW|A0A0F4PBB9', 'RbmC|A0A2S1ZSI6', 'Bap1|Q9KQW0', 'pilF|A0A290TXQ9', 'HfsD|Q9A5L5', 'HfsF|Q9A5M1', 'HfsG|Q9A5M0', 'yfiB|Q9I4L6', 'sipW|P54506', 'ChiA|P32823', 'HfsC|Q9A5L8', 'HfsA|Q9A5L6', 'sdrC|A0A6A8FED6', 'GbpA|C3LW75', 'SRFAD|Q08788']	8	foo_chia_omp_ompu_sdrc_bap1_rbmc_gbpa	adhesion_chitinase-production	2	87	Hyphomonas sp.
GCA_002717635.1	11	['OmpU|P0C6Q6', 'HfsF|Q9A5M1', 'HfsH|Q9A5L9', 'HfsG|Q9A5M0', 'sdrC|A0A6A8FED6', 'yfiB|Q9I4L6', 'sipW|P54506', 'ChiA|P32823', 'HfsC|Q9A5L8', 'HfaB|P27343', 'HfsA|Q9A5L6']	4	hfacces_chia_ompu_sdrc	adhesion_chitinase-production	2	2026728	Crocinitomicaceae bacterium
GCA_014077085.1	18	['HfsD|Q9A5L5', 'OmpU|P0C6Q6', 'HfsF|Q9A5M1', 'HfsE|Q9A5M2', 'HfsH|Q9A5L9', 'HfsG|Q9A5M0', 'tpbB|A0A0H2Z7X0', 'sdrC|A0A6A8FED6', 'ompA|A0A3B6XXR4', 'yfiB|Q9I4L6', 'ompW|A0A0F4PBB9', 'pilF|A0A290TXQ9', 'sipW|P54506', 'ChiA|P32823', 'HfsC|Q9A5L8', 'HfaB|P27343', 'HfsA|Q9A5L6', 'SRFAD|Q08788']	6	hfs_hfacces_chia_omp_ompu_sdrc	adhesion_chitinase-production	2	2759823	Colwellia sp. MB02u-9
GCA_002711465.1	11	['SRFAA|P27206', 'SRFAB|Q04747', 'HfsF|Q9A5M1', 'HfsG|Q9A5M0', 'sdrC|A0A6A8FED6', 'yfiB|Q9I4L6', 'sipW|P54506', 'RbmC|A0A2S1ZSI6', 'ChiA|P32823', 'HfsC|Q9A5L8', 'Bap1|Q9KQW0']	4	chia_sdrc_bap1_rbmc	chitinase-production_adhesion	2	2026760	Candidatus Marinimicrobia bacterium
GCA_014297465.1	13	['HfsD|Q9A5L5', 'OmpU|P0C6Q6', 'HfsF|Q9A5M1', 'HfsH|Q9A5L9', 'HfsG|Q9A5M0', 'sdrC|A0A6A8FED6', 'yfiB|Q9I4L6', 'ompW|A0A0F4PBB9', 'sipW|P54506', 'ChiA|P32823', 'HfsC|Q9A5L8', 'HfsA|Q9A5L6', 'SRFAD|Q08788']	3	chia_ompu_sdrc	chitinase-production_adhesion	2	2764187	Ramlibacter sp. USB13
GCA_002700705.1	11	['OmpU|P0C6Q6', 'HfsF|Q9A5M1', 'HfsG|Q9A5M0', 'sdrC|A0A6A8FED6', 'ompA|A0A3B6XXR4', 'yfiB|Q9I4L6', 'sipW|P54506', 'ChiA|P32823', 'HfsC|Q9A5L8', 'HfaB|P27343', 'pilF|A0A290TXQ9']	4	hfacces_chia_ompu_sdrc	adhesion_chitinase-production	2	2026760	Candidatus Marinimicrobia bacterium
GCA_014279555.1	12	['HfsD|Q9A5L5', 'HfsF|Q9A5M1', 'HfsE|Q9A5M2', 'HfsG|Q9A5M0', 'tpbB|A0A0H2Z7X0', 'ompA|A0A3B6XXR4', 'sipW|P54506', 'ChiA|P32823', 'HfsC|Q9A5L8', 'HfaB|P27343', 'HfsA|Q9A5L6', 'SRFAD|Q08788']	2	hfacces_chia	adhesion_chitinase-production	2	1050714	Synechococcus sp. SYN20
GCA_002686945.1	14	['HfsD|Q9A5L5', 'HfsF|Q9A5M1', 'HfsE|Q9A5M2', 'HfsH|Q9A5L9', 'HfsG|Q9A5M0', 'sdrC|A0A6A8FED6', 'ompA|A0A3B6XXR4', 'yfiB|Q9I4L6', 'sipW|P54506', 'ChiA|P32823', 'HfsC|Q9A5L8', 'HfaB|P27343', 'HfsA|Q9A5L6', 'SRFAD|Q08788']	4	hfs_hfacces_chia_sdrc	adhesion_chitinase-production	2	2026780	Planctomycetota bacterium
GCA_001634725.1	14	['SRFAA|P27206', 'SRFAB|Q04747', 'HfsD|Q9A5L5', 'OmpU|P0C6Q6', 'HfsF|Q9A5M1', 'bslB|P39632', 'HfsG|Q9A5M0', 'HfsH|Q9A5L9', 'sdrC|A0A6A8FED6', 'SRFAD|Q08788', 'yfiB|Q9I4L6', 'sipW|P54506', 'HfsA|Q9A5L6', 'bslA|P71014']	3	bsl_ompu_sdrc	drag-reducing_adhesion	2	1822224	Sulfitobacter sp. HI0021
GCA_001304225.1	10	['HfsD|Q9A5L5', 'HfsF|Q9A5M1', 'HfsG|Q9A5M0', 'sdrC|A0A6A8FED6', 'ompA|A0A3B6XXR4', 'sipW|P54506', 'ChiA|P32823', 'HfsC|Q9A5L8', 'HfaB|P27343', 'HfsA|Q9A5L6']	3	hfacces_chia_sdrc	adhesion_chitinase-production	2	1703424	candidate division Zixibacteria bacterium SM1_73
GCA_009709615.1	23	['CHPC|Q9AD93', 'ompA|A0A3B6XXR4', 'CHPE|Q9X9Z2', 'OmpU|P0C6Q6', 'tpbB|A0A0H2Z7X0', 'ompW|A0A0F4PBB9', 'CHPG|Q9KYH3', 'CHPA|Q8CJY7', 'HfsD|Q9A5L5', 'HfsF|Q9A5M1', 'HfsE|Q9A5M2', 'HfsG|Q9A5M0', 'HfsH|Q9A5L9', 'yfiB|Q9I4L6', 'CHPF|Q9KYG7', 'CHPH|Q9AD92', 'sipW|P54506', 'HfsC|Q9A5L8', 'HfsA|Q9A5L6', 'CHPB|Q9X7U2', 'sdrC|A0A6A8FED6', 'CHPD|Q9L1J9', 'SRFAD|Q08788']	4	hfs_chp_ompu_sdrc	adhesion_drag-reducing	2	2608631	Winogradskyella ouciana
GCA_011759385.1	17	['HfsD|Q9A5L5', 'HfsF|Q9A5M1', 'HfsE|Q9A5M2', 'HfsH|Q9A5L9', 'HfsG|Q9A5M0', 'tpbB|A0A0H2Z7X0', 'sdrC|A0A6A8FED6', 'ompA|A0A3B6XXR4', 'yfiB|Q9I4L6', 'ompW|A0A0F4PBB9', 'sipW|P54506', 'RbmC|A0A2S1ZSI6', 'ChiA|P32823', 'HfsC|Q9A5L8', 'HfsA|Q9A5L6', 'Bap1|Q9KQW0', 'SRFAD|Q08788']	5	hfs_chia_sdrc_bap1_rbmc	adhesion_chitinase-production	2	2719047	Oleiagrimonas sp. C23AA
GCA_013364155.1	25	['SRFAB|Q04747', 'CHPC|Q9AD93', 'Foo1|A1X158', 'ompA|A0A3B6XXR4', 'CHPE|Q9X9Z2', 'SRFAA|P27206', 'CHPG|Q9KYH3', 'CHPA|Q8CJY7', 'HfsD|Q9A5L5', 'HfsF|Q9A5M1', 'HfsE|Q9A5M2', 'HfsG|Q9A5M0', 'HfsH|Q9A5L9', 'SRFAC|Q08787', 'yfiB|Q9I4L6', 'CHPF|Q9KYG7', 'CHPH|Q9AD92', 'sipW|P54506', 'HfsC|Q9A5L8', 'HfsA|Q9A5L6', 'CHPB|Q9X7U2', 'sdrC|A0A6A8FED6', 'CHPD|Q9L1J9', 'GbpA|C3LW75', 'SRFAD|Q08788']	6	srf_hfs_chp_foo_sdrc_gbpa	drag-reducing_adhesion	2	2742137	Streptomyces sp. NA02950
GCA_002876325.1	17	['HfsD|Q9A5L5', 'OmpU|P0C6Q6', 'HfsF|Q9A5M1', 'HfsH|Q9A5L9', 'HfsG|Q9A5M0', 'tpbB|A0A0H2Z7X0', 'ompA|A0A3B6XXR4', 'yfiB|Q9I4L6', 'ompW|A0A0F4PBB9', 'GbpA|C3LW75', 'sipW|P54506', 'ChiA|P32823', 'HfsC|Q9A5L8', 'yfiR|Q9I4L4', 'HfaB|P27343', 'HfsA|Q9A5L6', 'SRFAD|Q08788']	5	hfacces_chia_yfi_ompu_gbpa	adhesion_chitinase-production	2	1880849	Vibrio sp. 10N.261.52.A1
GCA_002724235.1	11	['HfsD|Q9A5L5', 'HfsF|Q9A5M1', 'HfsE|Q9A5M2', 'HfsG|Q9A5M0', 'sdrC|A0A6A8FED6', 'yfiB|Q9I4L6', 'sipW|P54506', 'ChiA|P32823', 'HfsC|Q9A5L8', 'yfiR|Q9I4L4', 'SRFAD|Q08788']	2	chia_sdrc	chitinase-production_adhesion	2	2026772	Opitutales bacterium
GCA_900100315.1	26	['SRFAB|Q04747', 'CHPC|Q9AD93', 'Foo1|A1X158', 'ompA|A0A3B6XXR4', 'CHPE|Q9X9Z2', 'SRFAA|P27206', 'CHPG|Q9KYH3', 'RbmC|A0A2S1ZSI6', 'Bap1|Q9KQW0', 'CHPA|Q8CJY7', 'HfsD|Q9A5L5', 'HfsF|Q9A5M1', 'HfsE|Q9A5M2', 'HfsG|Q9A5M0', 'HfsH|Q9A5L9', 'SRFAC|Q08787', 'yfiB|Q9I4L6', 'CHPF|Q9KYG7', 'CHPH|Q9AD92', 'sipW|P54506', 'HfsC|Q9A5L8', 'HfsA|Q9A5L6', 'CHPB|Q9X7U2', 'CHPD|Q9L1J9', 'GbpA|C3LW75', 'SRFAD|Q0878…	7	srf_hfs_chp_foo_bap1_rbmc_gbpa	drag-reducing_adhesion	2	417292	Streptomyces indicus
GCA_007859755.1	14	['SRFAA|P27206', 'SRFAB|Q04747', 'HfsD|Q9A5L5', 'HfsG|Q9A5M0', 'HfsE|Q9A5M2', 'HfsH|Q9A5L9', 'sdrC|A0A6A8FED6', 'yfiB|Q9I4L6', 'sipW|P54506', 'ChiA|P32823', 'HfsC|Q9A5L8', 'yfiR|Q9I4L4', 'HfsA|Q9A5L6', 'SRFAD|Q08788']	2	chia_sdrc	chitinase-production_adhesion	2	2527970	Blastopirellula retiformator
GCA_001663395.1	11	['SRFAA|P27206', 'SRFAB|Q04747', 'HfsD|Q9A5L5', 'HfsF|Q9A5M1', 'HfsG|Q9A5M0', 'sdrC|A0A6A8FED6', 'sipW|P54506', 'ChiA|P32823', 'HfsC|Q9A5L8', 'HfsA|Q9A5L6', 'SRFAD|Q08788']	2	chia_sdrc	chitinase-production_adhesion	2	1715860	Staphylococcus sp. AntiMn-1
GCA_002690925.1	14	['HfsD|Q9A5L5', 'OmpU|P0C6Q6', 'HfsG|Q9A5M0', 'HfsE|Q9A5M2', 'HfsH|Q9A5L9', 'tpbB|A0A0H2Z7X0', 'sdrC|A0A6A8FED6', 'yfiB|Q9I4L6', 'ompW|A0A0F4PBB9', 'sipW|P54506', 'ChiA|P32823', 'HfsC|Q9A5L8', 'HfsA|Q9A5L6', 'SRFAD|Q08788']	3	chia_ompu_sdrc	chitinase-production_adhesion	2	2024855	Rhodopirellula sp.
GCA_002711455.1	17	['SRFAA|P27206', 'SRFAB|Q04747', 'HfsD|Q9A5L5', 'Foo1|A1X158', 'HfsF|Q9A5M1', 'HfsG|Q9A5M0', 'OmpU|P0C6Q6', 'tpbB|A0A0H2Z7X0', 'tasA|P54507', 'sdrC|A0A6A8FED6', 'SRFAC|Q08787', 'ompA|A0A3B6XXR4', 'yfiB|Q9I4L6', 'sipW|P54506', 'HfsC|Q9A5L8', 'HfsA|Q9A5L6', 'SRFAD|Q08788']	5	srf_foo_tapA_ompu_sdrc	drag-reducing_adhesion	2	192149	Muricauda sp.
GCA_014905135.1	15	['OmpU|P0C6Q6', 'HfsF|Q9A5M1', 'HfsE|Q9A5M2', 'HfsH|Q9A5L9', 'HfsG|Q9A5M0', 'tpbB|A0A0H2Z7X0', 'ompA|A0A3B6XXR4', 'yfiB|Q9I4L6', 'sipW|P54506', 'RbmC|A0A2S1ZSI6', 'ChiA|P32823', 'HfsC|Q9A5L8', 'HfaB|P27343', 'Bap1|Q9KQW0', 'SRFAD|Q08788']	5	hfacces_chia_ompu_bap1_rbmc	adhesion_chitinase-production	2	317658	Sulfurimonas paralvinellae
GCA_004005565.1	14	['SRFAA|P27206', 'SRFAB|Q04747', 'HfsD|Q9A5L5', 'Foo1|A1X158', 'HfsF|Q9A5M1', 'HfsG|Q9A5M0', 'HfsH|Q9A5L9', 'OmpU|P0C6Q6', 'sdrC|A0A6A8FED6', 'yfiB|Q9I4L6', 'sipW|P54506', 'ChiA|P32823', 'HfaB|P27343', 'SRFAD|Q08788']	5	hfacces_foo_chia_ompu_sdrc	adhesion_chitinase-production	2	2480984	Lujinxingia sediminis
GCA_001302885.1	14	['SRFAA|P27206', 'SRFAB|Q04747', 'HfsD|Q9A5L5', 'HfsF|Q9A5M1', 'HfsG|Q9A5M0', 'HfsH|Q9A5L9', 'sdrC|A0A6A8FED6', 'SRFAC|Q08787', 'yfiB|Q9I4L6', 'sipW|P54506', 'RbmC|A0A2S1ZSI6', 'ChiA|P32823', 'HfaB|P27343', 'Bap1|Q9KQW0']	5	hfacces_chia_sdrc_bap1_rbmc	adhesion_chitinase-production	2	1704237	Spirochaetes bacterium DG_61
GCA_014163845.1	18	['HfsD|Q9A5L5', 'Foo1|A1X158', 'HfsF|Q9A5M1', 'HfsH|Q9A5L9', 'HfsG|Q9A5M0', 'OmpU|P0C6Q6', 'ompA|A0A3B6XXR4', 'yfiB|Q9I4L6', 'ompW|A0A0F4PBB9', 'GbpA|C3LW75', 'sipW|P54506', 'RbmC|A0A2S1ZSI6', 'ChiA|P32823', 'HfsC|Q9A5L8', 'HfaB|P27343', 'HfsA|Q9A5L6', 'Bap1|Q9KQW0', 'SRFAD|Q08788']	7	hfacces_foo_chia_ompu_bap1_rbmc_gbpa	adhesion_chitinase-production	2	2760942	Shewanella sp. SR43-4
GCA_900188395.1	14	['HfsD|Q9A5L5', 'HfsF|Q9A5M1', 'HfsE|Q9A5M2', 'HfsH|Q9A5L9', 'HfsG|Q9A5M0', 'tpbB|A0A0H2Z7X0', 'sdrC|A0A6A8FED6', 'yfiB|Q9I4L6', 'sipW|P54506', 'RbmC|A0A2S1ZSI6', 'ChiA|P32823', 'HfsC|Q9A5L8', 'HfsA|Q9A5L6', 'Bap1|Q9KQW0']	5	hfs_chia_sdrc_bap1_rbmc	adhesion_chitinase-production	2	240169	Desulfurobacterium atlanticum
GCA_002723335.1	19	['Foo1|A1X158', 'ompA|A0A3B6XXR4', 'OmpU|P0C6Q6', 'tpbB|A0A0H2Z7X0', 'ompW|A0A0F4PBB9', 'RbmC|A0A2S1ZSI6', 'Bap1|Q9KQW0', 'HfsD|Q9A5L5', 'HfsF|Q9A5M1', 'HfsE|Q9A5M2', 'HfsH|Q9A5L9', 'HfsG|Q9A5M0', 'yfiB|Q9I4L6', 'sipW|P54506', 'ChiA|P32823', 'HfsC|Q9A5L8', 'HfsA|Q9A5L6', 'sdrC|A0A6A8FED6', 'SRFAD|Q08788']	7	hfs_foo_chia_ompu_sdrc_bap1_rbmc	adhesion_chitinase-production	2	1932666	Haliea sp.
GCA_002708925.1	14	['SRFAA|P27206', 'SRFAB|Q04747', 'HfsD|Q9A5L5', 'OmpU|P0C6Q6', 'HfsF|Q9A5M1', 'bslB|P39632', 'HfsG|Q9A5M0', 'HfsH|Q9A5L9', 'SRFAD|Q08788', 'yfiB|Q9I4L6', 'sipW|P54506', 'HfsC|Q9A5L8', 'HfsA|Q9A5L6', 'bslA|P71014']	2	bsl_ompu	drag-reducing_adhesion	2	1904441	Rhodobacteraceae bacterium
GCA_900129785.1	16	['SRFAA|P27206', 'SRFAB|Q04747', 'HfsD|Q9A5L5', 'Foo1|A1X158', 'HfsF|Q9A5M1', 'HfsG|Q9A5M0', 'HfsH|Q9A5L9', 'tpbB|A0A0H2Z7X0', 'sdrC|A0A6A8FED6', 'ompA|A0A3B6XXR4', 'SRFAC|Q08787', 'yfiB|Q9I4L6', 'sipW|P54506', 'HfsC|Q9A5L8', 'HfsA|Q9A5L6', 'SRFAD|Q08788']	3	srf_foo_sdrc	drag-reducing_adhesion	2	226505	Algoriphagus halophilus
GCA_001458335.1	13	['SRFAA|P27206', 'SRFAB|Q04747', 'HfsD|Q9A5L5', 'OmpU|P0C6Q6', 'HfsG|Q9A5M0', 'HfsE|Q9A5M2', 'HfsH|Q9A5L9', 'GalL|C0HLX7', 'yfiB|Q9I4L6', 'sipW|P54506', 'HfsC|Q9A5L8', 'HfsA|Q9A5L6', 'SRFAD|Q08788']	2	gal_ompu	colonization-resistance_adhesion	2	1715691	Cognatishimia activa
GCA_000212355.1	15	['HfsD|Q9A5L5', 'Foo1|A1X158', 'HfsG|Q9A5M0', 'HfsE|Q9A5M2', 'HfsH|Q9A5L9', 'sdrC|A0A6A8FED6', 'ompA|A0A3B6XXR4', 'yfiB|Q9I4L6', 'sipW|P54506', 'ChiA|P32823', 'HfsC|Q9A5L8', 'yfiR|Q9I4L4', 'HfaB|P27343', 'HfsA|Q9A5L6', 'SRFAD|Q08788']	4	hfacces_foo_chia_sdrc	adhesion_chitinase-production	2	983548	Dokdonia sp. 4H-3-7-5
GCA_002874195.1	16	['HfsD|Q9A5L5', 'OmpU|P0C6Q6', 'HfsG|Q9A5M0', 'HfsH|Q9A5L9', 'ompA|A0A3B6XXR4', 'tpbB|A0A0H2Z7X0', 'yfiB|Q9I4L6', 'ompW|A0A0F4PBB9', 'GbpA|C3LW75', 'sipW|P54506', 'ChiA|P32823', 'HfsC|Q9A5L8', 'yfiR|Q9I4L4', 'HfaB|P27343', 'HfsA|Q9A5L6', 'SRFAD|Q08788']	5	hfacces_chia_yfi_ompu_gbpa	adhesion_chitinase-production	2	1884476	Vibrio sp. 10N.286.45.E10
GCA_002720975.1	14	['SRFAA|P27206', 'SRFAB|Q04747', 'OmpU|P0C6Q6', 'HfsF|Q9A5M1', 'HfsE|Q9A5M2', 'HfsG|Q9A5M0', 'HfsH|Q9A5L9', 'sdrC|A0A6A8FED6', 'yfiB|Q9I4L6', 'sipW|P54506', 'ChiA|P32823', 'HfsC|Q9A5L8', 'HfsA|Q9A5L6', 'SRFAD|Q08788']	3	chia_ompu_sdrc	chitinase-production_adhesion	2	2026780	Planctomycetota bacterium
GCA_007558815.1	17	['SRFAA|P27206', 'SRFAB|Q04747', 'HfsD|Q9A5L5', 'OmpU|P0C6Q6', 'HfsF|Q9A5M1', 'HfsE|Q9A5M2', 'HfsG|Q9A5M0', 'HfsH|Q9A5L9', 'SRFAC|Q08787', 'yfiB|Q9I4L6', 'ompW|A0A0F4PBB9', 'sipW|P54506', 'RbmC|A0A2S1ZSI6', 'HfsC|Q9A5L8', 'HfaB|P27343', 'Bap1|Q9KQW0', 'SRFAD|Q08788']	5	srf_hfacces_ompu_bap1_rbmc	drag-reducing_adhesion	2	1247510	Verticiella sediminum
GCA_000816465.4	24	['SRFAB|Q04747', 'CHPC|Q9AD93', 'Foo1|A1X158', 'ompA|A0A3B6XXR4', 'CHPE|Q9X9Z2', 'SRFAA|P27206', 'CHPG|Q9KYH3', 'CHPA|Q8CJY7', 'HfsD|Q9A5L5', 'HfsF|Q9A5M1', 'HfsE|Q9A5M2', 'HfsG|Q9A5M0', 'HfsH|Q9A5L9', 'SRFAC|Q08787', 'yfiB|Q9I4L6', 'CHPF|Q9KYG7', 'CHPH|Q9AD92', 'sipW|P54506', 'HfsC|Q9A5L8', 'HfsA|Q9A5L6', 'CHPB|Q9X7U2', 'CHPD|Q9L1J9', 'GbpA|C3LW75', 'SRFAD|Q08788']	5	srf_hfs_chp_foo_gbpa	drag-reducing_adhesion	2	1355015	Streptomyces pluripotens
GCA_900107255.1	27	['SRFAB|Q04747', 'CHPC|Q9AD93', 'Foo1|A1X158', 'ompA|A0A3B6XXR4', 'CHPE|Q9X9Z2', 'SRFAA|P27206', 'tpbB|A0A0H2Z7X0', 'CHPG|Q9KYH3', 'RbmC|A0A2S1ZSI6', 'Bap1|Q9KQW0', 'CHPA|Q8CJY7', 'HfsD|Q9A5L5', 'HfsF|Q9A5M1', 'HfsE|Q9A5M2', 'HfsG|Q9A5M0', 'HfsH|Q9A5L9', 'SRFAC|Q08787', 'yfiB|Q9I4L6', 'CHPF|Q9KYG7', 'CHPH|Q9AD92', 'sipW|P54506', 'HfsC|Q9A5L8', 'HfsA|Q9A5L6', 'CHPB|Q9X7U2', 'CHPD|Q9L1J9', 'GbpA|C3…	7	srf_hfs_chp_foo_bap1_rbmc_gbpa	drag-reducing_adhesion	2	405436	Micromonospora pattaloongensis
GCA_002703575.1	12	['HfsF|Q9A5M1', 'HfsH|Q9A5L9', 'HfsG|Q9A5M0', 'tpbB|A0A0H2Z7X0', 'yfiB|Q9I4L6', 'RbmC|A0A2S1ZSI6', 'ChiA|P32823', 'HfsC|Q9A5L8', 'yfiR|Q9I4L4', 'HfaB|P27343', 'HfsA|Q9A5L6', 'Bap1|Q9KQW0']	5	hfacces_chia_yfi_bap1_rbmc	adhesion_chitinase-production	2	2026728	Crocinitomicaceae bacterium
GCA_002704555.1	10	['HfsD|Q9A5L5', 'HfsF|Q9A5M1', 'HfsG|Q9A5M0', 'sdrC|A0A6A8FED6', 'yfiB|Q9I4L6', 'RbmC|A0A2S1ZSI6', 'ChiA|P32823', 'HfsC|Q9A5L8', 'Bap1|Q9KQW0', 'SRFAD|Q08788']	4	chia_sdrc_bap1_rbmc	chitinase-production_adhesion	2	2026735	Deltaproteobacteria bacterium
GCA_002699585.1	11	['HfsD|Q9A5L5', 'HfsF|Q9A5M1', 'HfsE|Q9A5M2', 'HfsH|Q9A5L9', 'HfsG|Q9A5M0', 'sdrC|A0A6A8FED6', 'sipW|P54506', 'ChiA|P32823', 'HfsC|Q9A5L8', 'HfsA|Q9A5L6', 'SRFAD|Q08788']	3	hfs_chia_sdrc	adhesion_chitinase-production	2	2024896	Anaerolineaceae bacterium
GCA_002722935.1	11	['HfsD|Q9A5L5', 'HfsF|Q9A5M1', 'HfsH|Q9A5L9', 'HfsG|Q9A5M0', 'sdrC|A0A6A8FED6', 'ompA|A0A3B6XXR4', 'ompW|A0A0F4PBB9', 'sipW|P54506', 'RbmC|A0A2S1ZSI6', 'ChiA|P32823', 'Bap1|Q9KQW0']	4	chia_sdrc_bap1_rbmc	chitinase-production_adhesion	2	2026778	Phycisphaerae bacterium
GCA_002009175.1	24	['SRFAB|Q04747', 'CHPC|Q9AD93', 'ompA|A0A3B6XXR4', 'CHPE|Q9X9Z2', 'SRFAA|P27206', 'CHPG|Q9KYH3', 'CHPA|Q8CJY7', 'HfsD|Q9A5L5', 'HfsF|Q9A5M1', 'HfsE|Q9A5M2', 'HfsG|Q9A5M0', 'HfsH|Q9A5L9', 'SRFAC|Q08787', 'yfiB|Q9I4L6', 'CHPF|Q9KYG7', 'CHPH|Q9AD92', 'sipW|P54506', 'HfsC|Q9A5L8', 'HfsA|Q9A5L6', 'CHPB|Q9X7U2', 'sdrC|A0A6A8FED6', 'CHPD|Q9L1J9', 'GbpA|C3LW75', 'SRFAD|Q08788']	5	srf_hfs_chp_sdrc_gbpa	drag-reducing_adhesion	2	193462	Streptomyces niveus
GCA_002716165.1	12	['HfsF|Q9A5M1', 'HfsG|Q9A5M0', 'sdrC|A0A6A8FED6', 'tpbB|A0A0H2Z7X0', 'yfiB|Q9I4L6', 'sipW|P54506', 'RbmC|A0A2S1ZSI6', 'ChiA|P32823', 'HfsC|Q9A5L8', 'HfsA|Q9A5L6', 'Bap1|Q9KQW0', 'SRFAD|Q08788']	4	chia_sdrc_bap1_rbmc	chitinase-production_adhesion	2	2026735	Deltaproteobacteria bacterium
GCA_002703145.1	9	['HfsD|Q9A5L5', 'HfsF|Q9A5M1', 'HfsG|Q9A5M0', 'sdrC|A0A6A8FED6', 'ompA|A0A3B6XXR4', 'ChiA|P32823', 'HfsC|Q9A5L8', 'HfsA|Q9A5L6', 'SRFAD|Q08788']	2	chia_sdrc	chitinase-production_adhesion	2	2026784	Puniceicoccaceae bacterium
GCA_002876915.1	20	['SRFAB|Q04747', 'ompA|A0A3B6XXR4', 'HfaB|P27343', 'SRFAA|P27206', 'OmpU|P0C6Q6', 'tpbB|A0A0H2Z7X0', 'ompW|A0A0F4PBB9', 'RbmC|A0A2S1ZSI6', 'Bap1|Q9KQW0', 'HfsD|Q9A5L5', 'HfsG|Q9A5M0', 'HfsH|Q9A5L9', 'yfiB|Q9I4L6', 'sipW|P54506', 'ChiA|P32823', 'HfsC|Q9A5L8', 'yfiR|Q9I4L4', 'HfsA|Q9A5L6', 'GbpA|C3LW75', 'SRFAD|Q08788']	7	hfacces_chia_yfi_ompu_bap1_rbmc_gbpa	adhesion_chitinase-production	2	1880848	Vibrio sp. 10N.261.49.E11
GCA_002072955.1	16	['SRFAA|P27206', 'SRFAB|Q04747', 'HfsD|Q9A5L5', 'HfsG|Q9A5M0', 'HfsE|Q9A5M2', 'HfsH|Q9A5L9', 'sdrC|A0A6A8FED6', 'yfiB|Q9I4L6', 'sipW|P54506', 'RbmC|A0A2S1ZSI6', 'ChiA|P32823', 'HfsC|Q9A5L8', 'HfaB|P27343', 'HfsA|Q9A5L6', 'Bap1|Q9KQW0', 'SRFAD|Q08788']	5	hfacces_chia_sdrc_bap1_rbmc	adhesion_chitinase-production	2	1420851	Methyloprofundus sedimenti
GCA_900110425.1	15	['SRFAA|P27206', 'SRFAB|Q04747', 'HfsD|Q9A5L5', 'Foo1|A1X158', 'HfsG|Q9A5M0', 'HfsH|Q9A5L9', 'OmpU|P0C6Q6', 'sdrC|A0A6A8FED6', 'ompA|A0A3B6XXR4', 'yfiB|Q9I4L6', 'sipW|P54506', 'ChiA|P32823', 'HfaB|P27343', 'HfsA|Q9A5L6', 'SRFAD|Q08788']	5	hfacces_foo_chia_ompu_sdrc	adhesion_chitinase-production	2	569882	Salinihabitans flavidus
GCA_002724155.1	12	['HfsF|Q9A5M1', 'HfsE|Q9A5M2', 'HfsG|Q9A5M0', 'tpbB|A0A0H2Z7X0', 'sdrC|A0A6A8FED6', 'yfiB|Q9I4L6', 'RbmC|A0A2S1ZSI6', 'ChiA|P32823', 'HfsC|Q9A5L8', 'HfsA|Q9A5L6', 'Bap1|Q9KQW0', 'SRFAD|Q08788']	4	chia_sdrc_bap1_rbmc	chitinase-production_adhesion	2	2026728	Crocinitomicaceae bacterium
GCA_014077195.1	18	['HfsD|Q9A5L5', 'Foo1|A1X158', 'HfsG|Q9A5M0', 'HfsH|Q9A5L9', 'OmpU|P0C6Q6', 'tpbB|A0A0H2Z7X0', 'sdrC|A0A6A8FED6', 'ompA|A0A3B6XXR4', 'yfiB|Q9I4L6', 'ompW|A0A0F4PBB9', 'pilF|A0A290TXQ9', 'sipW|P54506', 'ChiA|P32823', 'HfsC|Q9A5L8', 'yfiR|Q9I4L4', 'HfaB|P27343', 'HfsA|Q9A5L6', 'SRFAD|Q08788']	7	hfacces_foo_chia_omp_yfi_ompu_sdrc	adhesion_chitinase-production	2	2759830	Colwellia sp. BRX9-1
GCA_014164325.1	20	['Foo1|A1X158', 'ompA|A0A3B6XXR4', 'HfaB|P27343', 'OmpU|P0C6Q6', 'tpbB|A0A0H2Z7X0', 'ompW|A0A0F4PBB9', 'HfsD|Q9A5L5', 'HfsF|Q9A5M1', 'HfsE|Q9A5M2', 'HfsH|Q9A5L9', 'HfsG|Q9A5M0', 'yfiB|Q9I4L6', 'sipW|P54506', 'ChiA|P32823', 'HfsC|Q9A5L8', 'yfiR|Q9I4L4', 'HfsA|Q9A5L6', 'sdrC|A0A6A8FED6', 'GbpA|C3LW75', 'SRFAD|Q08788']	8	hfs_hfacces_foo_chia_yfi_ompu_sdrc_gbpa	adhesion_chitinase-production	2	2760969	Pseudoalteromonas sp. SG43-4
GCA_900111025.1	17	['SRFAA|P27206', 'SRFAB|Q04747', 'HfsD|Q9A5L5', 'OmpU|P0C6Q6', 'HfsF|Q9A5M1', 'HfsE|Q9A5M2', 'HfsG|Q9A5M0', 'HfsH|Q9A5L9', 'sdrC|A0A6A8FED6', 'yfiB|Q9I4L6', 'sipW|P54506', 'RbmC|A0A2S1ZSI6', 'ChiA|P32823', 'HfsC|Q9A5L8', 'HfsA|Q9A5L6', 'Bap1|Q9KQW0', 'SRFAD|Q08788']	6	hfs_chia_ompu_sdrc_bap1_rbmc	adhesion_chitinase-production	2	419940	Hyunsoonleella jejuensis
GCA_000152485.1	19	['SRFAB|Q04747', 'ompA|A0A3B6XXR4', 'SRFAA|P27206', 'OmpU|P0C6Q6', 'tpbB|A0A0H2Z7X0', 'ompW|A0A0F4PBB9', 'RbmC|A0A2S1ZSI6', 'Bap1|Q9KQW0', 'HfsD|Q9A5L5', 'HfsG|Q9A5M0', 'HfsE|Q9A5M2', 'HfsH|Q9A5L9', 'yfiB|Q9I4L6', 'sipW|P54506', 'ChiA|P32823', 'HfsC|Q9A5L8', 'HfsA|Q9A5L6', 'GbpA|C3LW75', 'SRFAD|Q08788']	5	chia_ompu_bap1_rbmc_gbpa	chitinase-production_adhesion	2	150340	Vibrio antiquarius
GCA_900188325.1	15	['HfsD|Q9A5L5', 'Foo1|A1X158', 'HfsF|Q9A5M1', 'HfsE|Q9A5M2', 'HfsH|Q9A5L9', 'HfsG|Q9A5M0', 'sdrC|A0A6A8FED6', 'yfiB|Q9I4L6', 'pilF|A0A290TXQ9', 'sipW|P54506', 'ChiA|P32823', 'HfsC|Q9A5L8', 'yfiR|Q9I4L4', 'HfsA|Q9A5L6', 'SRFAD|Q08788']	4	hfs_foo_chia_sdrc	adhesion_chitinase-production	2	447679	Ekhidna lutea
GCA_003173795.1	20	['ompA|A0A3B6XXR4', 'HfaB|P27343', 'OmpU|P0C6Q6', 'tpbB|A0A0H2Z7X0', 'ompW|A0A0F4PBB9', 'RbmC|A0A2S1ZSI6', 'Bap1|Q9KQW0', 'HfsD|Q9A5L5', 'HfsF|Q9A5M1', 'HfsE|Q9A5M2', 'HfsH|Q9A5L9', 'HfsG|Q9A5M0', 'yfiB|Q9I4L6', 'sipW|P54506', 'ChiA|P32823', 'HfsC|Q9A5L8', 'HfsA|Q9A5L6', 'sdrC|A0A6A8FED6', 'GbpA|C3LW75', 'SRFAD|Q08788']	8	hfs_hfacces_chia_ompu_sdrc_bap1_rbmc_gbpa	adhesion_chitinase-production	2	2203192	Pseudoalteromonas sp. meg-B1
GCA_001889605.1	12	['HfsD|Q9A5L5', 'HfsF|Q9A5M1', 'HfsE|Q9A5M2', 'HfsH|Q9A5L9', 'HfsG|Q9A5M0', 'yfiB|Q9I4L6', 'pilF|A0A290TXQ9', 'sipW|P54506', 'ChiA|P32823', 'HfsC|Q9A5L8', 'HfsA|Q9A5L6', 'SRFAD|Q08788']	2	hfs_chia	adhesion_chitinase-production	2	1670800	Aquibium oceanicum
GCA_002688235.1	12	['HfsD|Q9A5L5', 'HfsG|Q9A5M0', 'HfsH|Q9A5L9', 'sdrC|A0A6A8FED6', 'ompA|A0A3B6XXR4', 'yfiB|Q9I4L6', 'ompW|A0A0F4PBB9', 'RbmC|A0A2S1ZSI6', 'ChiA|P32823', 'HfsA|Q9A5L6', 'Bap1|Q9KQW0', 'SRFAD|Q08788']	4	chia_sdrc_bap1_rbmc	chitinase-production_adhesion	2	2026738	Erythrobacteraceae bacterium
GCA_002731535.1	13	['SRFAA|P27206', 'SRFAB|Q04747', 'HfsD|Q9A5L5', 'HfsF|Q9A5M1', 'HfsE|Q9A5M2', 'HfsG|Q9A5M0', 'HfsH|Q9A5L9', 'sdrC|A0A6A8FED6', 'yfiB|Q9I4L6', 'sipW|P54506', 'ChiA|P32823', 'HfsC|Q9A5L8', 'SRFAD|Q08788']	2	chia_sdrc	chitinase-production_adhesion	2	2026779	Planctomycetaceae bacterium
GCA_002711245.1	13	['HfsD|Q9A5L5', 'Foo1|A1X158', 'HfsF|Q9A5M1', 'HfsH|Q9A5L9', 'HfsG|Q9A5M0', 'tpbB|A0A0H2Z7X0', 'yfiB|Q9I4L6', 'ompW|A0A0F4PBB9', 'RbmC|A0A2S1ZSI6', 'ChiA|P32823', 'HfsC|Q9A5L8', 'HfsA|Q9A5L6', 'Bap1|Q9KQW0']	4	foo_chia_bap1_rbmc	adhesion_chitinase-production	2	2026745	Halobacteriovoraceae bacterium
GCA_014164535.1	21	['Foo1|A1X158', 'ompA|A0A3B6XXR4', 'HfaB|P27343', 'OmpU|P0C6Q6', 'ompW|A0A0F4PBB9', 'RbmC|A0A2S1ZSI6', 'Bap1|Q9KQW0', 'pilF|A0A290TXQ9', 'HfsD|Q9A5L5', 'HfsF|Q9A5M1', 'HfsH|Q9A5L9', 'HfsG|Q9A5M0', 'yfiB|Q9I4L6', 'sipW|P54506', 'ChiA|P32823', 'HfsC|Q9A5L8', 'yfiR|Q9I4L4', 'HfsA|Q9A5L6', 'sdrC|A0A6A8FED6', 'GbpA|C3LW75', 'SRFAD|Q08788']	9	hfacces_foo_chia_omp_ompu_sdrc_bap1_rbmc_gbpa	adhesion_chitinase-production	2	2760978	Pseudoalteromonas sp. SG41-2
GCA_002689335.1	11	['SRFAA|P27206', 'SRFAB|Q04747', 'HfsD|Q9A5L5', 'HfsF|Q9A5M1', 'HfsE|Q9A5M2', 'HfsG|Q9A5M0', 'sdrC|A0A6A8FED6', 'SRFAC|Q08787', 'yfiB|Q9I4L6', 'ChiA|P32823', 'HfsA|Q9A5L6']	2	chia_sdrc	chitinase-production_adhesion	2	2026801	Verrucomicrobiales bacterium
GCA_002684295.1	15	['HfsD|Q9A5L5', 'OmpU|P0C6Q6', 'HfsF|Q9A5M1', 'HfsH|Q9A5L9', 'HfsG|Q9A5M0', 'sdrC|A0A6A8FED6', 'ompA|A0A3B6XXR4', 'yfiB|Q9I4L6', 'ompW|A0A0F4PBB9', 'sipW|P54506', 'RbmC|A0A2S1ZSI6', 'ChiA|P32823', 'HfsA|Q9A5L6', 'Bap1|Q9KQW0', 'SRFAD|Q08788']	5	chia_ompu_sdrc_bap1_rbmc	chitinase-production_adhesion	2	1874361	Idiomarina sp.
GCA_002710665.1	14	['HfsD|Q9A5L5', 'OmpU|P0C6Q6', 'HfsF|Q9A5M1', 'HfsG|Q9A5M0', 'tpbB|A0A0H2Z7X0', 'yfiB|Q9I4L6', 'sipW|P54506', 'RbmC|A0A2S1ZSI6', 'ChiA|P32823', 'HfsC|Q9A5L8', 'HfaB|P27343', 'HfsA|Q9A5L6', 'Bap1|Q9KQW0', 'SRFAD|Q08788']	5	hfacces_chia_ompu_bap1_rbmc	adhesion_chitinase-production	2	2026794	Sutterellaceae bacterium
GCA_002694765.1	16	['HfsD|Q9A5L5', 'Foo1|A1X158', 'HfsF|Q9A5M1', 'HfsE|Q9A5M2', 'HfsH|Q9A5L9', 'HfsG|Q9A5M0', 'OmpU|P0C6Q6', 'tpbB|A0A0H2Z7X0', 'sdrC|A0A6A8FED6', 'yfiB|Q9I4L6', 'ompW|A0A0F4PBB9', 'sipW|P54506', 'ChiA|P32823', 'HfsC|Q9A5L8', 'HfsA|Q9A5L6', 'SRFAD|Q08788']	5	hfs_foo_chia_ompu_sdrc	adhesion_chitinase-production	2	1931211	Xanthomarina sp.
GCA_004104355.1	18	['SRFAA|P27206', 'SRFAB|Q04747', 'HfsD|Q9A5L5', 'OmpU|P0C6Q6', 'HfsG|Q9A5M0', 'HfsE|Q9A5M2', 'HfsH|Q9A5L9', 'tpbB|A0A0H2Z7X0', 'sdrC|A0A6A8FED6', 'ompA|A0A3B6XXR4', 'yfiB|Q9I4L6', 'sipW|P54506', 'ChiA|P32823', 'HfsC|Q9A5L8', 'yfiR|Q9I4L4', 'HfaB|P27343', 'HfsA|Q9A5L6', 'SRFAD|Q08788']	5	hfacces_chia_yfi_ompu_sdrc	adhesion_chitinase-production	2	2485123	Photobacterium chitinilyticum
GCA_002709085.1	16	['SRFAA|P27206', 'SRFAB|Q04747', 'HfsD|Q9A5L5', 'OmpU|P0C6Q6', 'HfsF|Q9A5M1', 'HfsE|Q9A5M2', 'HfsG|Q9A5M0', 'sdrC|A0A6A8FED6', 'SRFAC|Q08787', 'yfiB|Q9I4L6', 'sipW|P54506', 'RbmC|A0A2S1ZSI6', 'HfsC|Q9A5L8', 'HfsA|Q9A5L6', 'Bap1|Q9KQW0', 'SRFAD|Q08788']	5	srf_ompu_sdrc_bap1_rbmc	drag-reducing_adhesion	2	1914328	Pseudooceanicola sp.
GCA_012933585.1	11	['HfsF|Q9A5M1', 'HfsE|Q9A5M2', 'HfsG|Q9A5M0', 'tpbB|A0A0H2Z7X0', 'ompA|A0A3B6XXR4', 'yfiB|Q9I4L6', 'sipW|P54506', 'ChiA|P32823', 'HfsC|Q9A5L8', 'HfaB|P27343', 'SRFAD|Q08788']	2	hfacces_chia	adhesion_chitinase-production	2	1218	unclassified
GCA_002696965.1	11	['HfsF|Q9A5M1', 'HfsG|Q9A5M0', 'sdrC|A0A6A8FED6', 'tpbB|A0A0H2Z7X0', 'yfiB|Q9I4L6', 'RbmC|A0A2S1ZSI6', 'ChiA|P32823', 'HfsC|Q9A5L8', 'HfsA|Q9A5L6', 'Bap1|Q9KQW0', 'SRFAD|Q08788']	4	chia_sdrc_bap1_rbmc	chitinase-production_adhesion	2	2021391	Flavobacteriales bacterium
GCA_002688155.1	11	['HfsD|Q9A5L5', 'HfsF|Q9A5M1', 'HfsH|Q9A5L9', 'HfsG|Q9A5M0', 'tpbB|A0A0H2Z7X0', 'sdrC|A0A6A8FED6', 'ompA|A0A3B6XXR4', 'yfiB|Q9I4L6', 'ChiA|P32823', 'yfiR|Q9I4L4', 'HfsA|Q9A5L6']	3	chia_yfi_sdrc	chitinase-production_adhesion	2	2026778	Phycisphaerae bacterium
GCA_002693575.1	16	['HfsD|Q9A5L5', 'Foo1|A1X158', 'HfsF|Q9A5M1', 'HfsE|Q9A5M2', 'HfsH|Q9A5L9', 'HfsG|Q9A5M0', 'OmpU|P0C6Q6', 'sdrC|A0A6A8FED6', 'ompA|A0A3B6XXR4', 'yfiB|Q9I4L6', 'ompW|A0A0F4PBB9', 'pilF|A0A290TXQ9', 'sipW|P54506', 'ChiA|P32823', 'HfaB|P27343', 'SRFAD|Q08788']	6	hfacces_foo_chia_omp_ompu_sdrc	adhesion_chitinase-production	2	232	Alteromonas sp.
GCA_002703505.1	9	['HfsF|Q9A5M1', 'HfsG|Q9A5M0', 'sdrC|A0A6A8FED6', 'tpbB|A0A0H2Z7X0', 'yfiB|Q9I4L6', 'RbmC|A0A2S1ZSI6', 'ChiA|P32823', 'HfaB|P27343', 'Bap1|Q9KQW0']	5	hfacces_chia_sdrc_bap1_rbmc	adhesion_chitinase-production	2	2026760	Candidatus Marinimicrobia bacterium
GCA_002708845.1	17	['SRFAA|P27206', 'SRFAB|Q04747', 'HfsD|Q9A5L5', 'Foo1|A1X158', 'HfsF|Q9A5M1', 'HfsE|Q9A5M2', 'HfsG|Q9A5M0', 'HfsH|Q9A5L9', 'sdrC|A0A6A8FED6', 'ompA|A0A3B6XXR4', 'yfiB|Q9I4L6', 'sipW|P54506', 'ChiA|P32823', 'HfsC|Q9A5L8', 'HfaB|P27343', 'HfsA|Q9A5L6', 'SRFAD|Q08788']	5	hfs_hfacces_foo_chia_sdrc	adhesion_chitinase-production	2	1977054	Leeuwenhoekiella sp.
GCA_002727915.1	8	['OmpU|P0C6Q6', 'HfsG|Q9A5M0', 'ompA|A0A3B6XXR4', 'tpbB|A0A0H2Z7X0', 'SRFAC|Q08787', 'yfiB|Q9I4L6', 'sipW|P54506', 'ChiA|P32823']	2	chia_ompu	chitinase-production_adhesion	2	2026801	Verrucomicrobiales bacterium
GCA_001886435.1	21	['Foo1|A1X158', 'ompA|A0A3B6XXR4', 'HfaB|P27343', 'OmpU|P0C6Q6', 'tpbB|A0A0H2Z7X0', 'ompW|A0A0F4PBB9', 'RbmC|A0A2S1ZSI6', 'Bap1|Q9KQW0', 'pilF|A0A290TXQ9', 'HfsD|Q9A5L5', 'HfsF|Q9A5M1', 'HfsE|Q9A5M2', 'HfsH|Q9A5L9', 'HfsG|Q9A5M0', 'yfiB|Q9I4L6', 'sipW|P54506', 'ChiA|P32823', 'HfsC|Q9A5L8', 'HfsA|Q9A5L6', 'sdrC|A0A6A8FED6', 'SRFAD|Q08788']	9	hfs_hfacces_foo_chia_omp_ompu_sdrc_bap1_rbmc	adhesion_chitinase-production	2	314275	Alteromonas mediterranea
GCA_002686595.1	14	['HfsD|Q9A5L5', 'Foo1|A1X158', 'HfsF|Q9A5M1', 'HfsE|Q9A5M2', 'HfsH|Q9A5L9', 'HfsG|Q9A5M0', 'sdrC|A0A6A8FED6', 'yfiB|Q9I4L6', 'sipW|P54506', 'ChiA|P32823', 'HfsC|Q9A5L8', 'HfaB|P27343', 'HfsA|Q9A5L6', 'SRFAD|Q08788']	5	hfs_hfacces_foo_chia_sdrc	adhesion_chitinase-production	2	2026780	Planctomycetota bacterium
GCA_002698575.1	14	['HfsD|Q9A5L5', 'Foo1|A1X158', 'HfsF|Q9A5M1', 'HfsE|Q9A5M2', 'HfsH|Q9A5L9', 'HfsG|Q9A5M0', 'tasA|P54507', 'sdrC|A0A6A8FED6', 'ompA|A0A3B6XXR4', 'sipW|P54506', 'ChiA|P32823', 'HfsC|Q9A5L8', 'HfsA|Q9A5L6', 'SRFAD|Q08788']	5	hfs_foo_chia_tapA_sdrc	adhesion_chitinase-production	2	51662	Pimelobacter sp.
GCA_002873335.1	12	['HfsD|Q9A5L5', 'OmpU|P0C6Q6', 'HfsG|Q9A5M0', 'HfsH|Q9A5L9', 'ompA|A0A3B6XXR4', 'yfiB|Q9I4L6', 'sipW|P54506', 'ChiA|P32823', 'HfsC|Q9A5L8', 'HfaB|P27343', 'HfsA|Q9A5L6', 'SRFAD|Q08788']	3	hfacces_chia_ompu	adhesion_chitinase-production	2	1880854	Vibrio sp. 10N.286.49.B1
GCA_004104075.1	18	['HfsD|Q9A5L5', 'HfsF|Q9A5M1', 'HfsE|Q9A5M2', 'HfsH|Q9A5L9', 'HfsG|Q9A5M0', 'tpbB|A0A0H2Z7X0', 'sdrC|A0A6A8FED6', 'ompA|A0A3B6XXR4', 'yfiB|Q9I4L6', 'ompW|A0A0F4PBB9', 'sipW|P54506', 'RbmC|A0A2S1ZSI6', 'ChiA|P32823', 'HfsC|Q9A5L8', 'HfaB|P27343', 'HfsA|Q9A5L6', 'Bap1|Q9KQW0', 'SRFAD|Q08788']	6	hfs_hfacces_chia_sdrc_bap1_rbmc	adhesion_chitinase-production	2	1550906	Leeuwenhoekiella polynyae
GCA_002729415.1	15	['HfsD|Q9A5L5', 'HfsF|Q9A5M1', 'bslB|P39632', 'HfsH|Q9A5L9', 'HfsG|Q9A5M0', 'sdrC|A0A6A8FED6', 'ompA|A0A3B6XXR4', 'yfiB|Q9I4L6', 'sipW|P54506', 'RbmC|A0A2S1ZSI6', 'HfsC|Q9A5L8', 'yfiR|Q9I4L4', 'HfsA|Q9A5L6', 'Bap1|Q9KQW0', 'bslA|P71014']	4	bsl_sdrc_bap1_rbmc	drag-reducing_adhesion	2	2026781	Candidatus Poribacteria bacterium
GCA_002708395.1	10	['SRFAA|P27206', 'SRFAB|Q04747', 'HfsD|Q9A5L5', 'Foo1|A1X158', 'HfsG|Q9A5M0', 'HfsH|Q9A5L9', 'pilF|A0A290TXQ9', 'sipW|P54506', 'ChiA|P32823', 'SRFAD|Q08788']	2	foo_chia	adhesion_chitinase-production	2	2026734	Dehalococcoidia bacterium
GCA_001886815.1	16	['SRFAA|P27206', 'SRFAB|Q04747', 'HfsD|Q9A5L5', 'OmpU|P0C6Q6', 'HfsF|Q9A5M1', 'HfsE|Q9A5M2', 'HfsG|Q9A5M0', 'HfsH|Q9A5L9', 'sdrC|A0A6A8FED6', 'SRFAC|Q08787', 'yfiB|Q9I4L6', 'sipW|P54506', 'HfsC|Q9A5L8', 'HfaB|P27343', 'HfsA|Q9A5L6', 'SRFAD|Q08788']	5	srf_hfs_hfacces_ompu_sdrc	drag-reducing_adhesion	2	880073	Caldithrix abyssi
GCA_900142235.1	16	['SRFAA|P27206', 'SRFAB|Q04747', 'HfsD|Q9A5L5', 'HfsF|Q9A5M1', 'HfsE|Q9A5M2', 'HfsG|Q9A5M0', 'HfsH|Q9A5L9', 'ompA|A0A3B6XXR4', 'SRFAC|Q08787', 'yfiB|Q9I4L6', 'sipW|P54506', 'RbmC|A0A2S1ZSI6', 'ChiA|P32823', 'HfsC|Q9A5L8', 'HfsA|Q9A5L6', 'Bap1|Q9KQW0']	4	hfs_chia_bap1_rbmc	adhesion_chitinase-production	2	1123349	Tepidibacter formicigenes
GCA_900115615.1	12	['HfsD|Q9A5L5', 'OmpU|P0C6Q6', 'HfsF|Q9A5M1', 'HfsE|Q9A5M2', 'HfsH|Q9A5L9', 'HfsG|Q9A5M0', 'yfiB|Q9I4L6', 'sipW|P54506', 'ChiA|P32823', 'HfsC|Q9A5L8', 'yfiR|Q9I4L4', 'HfsA|Q9A5L6']	3	hfs_chia_ompu	adhesion_chitinase-production	2	223786	Hydrogenimonas thermophila
GCA_012910715.1	15	['HfsD|Q9A5L5', 'Foo1|A1X158', 'HfsF|Q9A5M1', 'HfsE|Q9A5M2', 'HfsH|Q9A5L9', 'HfsG|Q9A5M0', 'GalL|C0HLX7', 'OmpU|P0C6Q6', 'tpbB|A0A0H2Z7X0', 'sdrC|A0A6A8FED6', 'yfiB|Q9I4L6', 'sipW|P54506', 'HfsC|Q9A5L8', 'HfsA|Q9A5L6', 'SRFAD|Q08788']	5	hfs_foo_gal_ompu_sdrc	adhesion_colonization-resistance	2	2729136	Flavivirga algicola
GCA_014076835.1	18	['HfsD|Q9A5L5', 'Foo1|A1X158', 'HfsF|Q9A5M1', 'HfsH|Q9A5L9', 'HfsG|Q9A5M0', 'OmpU|P0C6Q6', 'sdrC|A0A6A8FED6', 'yfiB|Q9I4L6', 'ompW|A0A0F4PBB9', 'GbpA|C3LW75', 'pilF|A0A290TXQ9', 'sipW|P54506', 'ChiA|P32823', 'HfsC|Q9A5L8', 'yfiR|Q9I4L4', 'HfaB|P27343', 'HfsA|Q9A5L6', 'SRFAD|Q08788']	6	hfacces_foo_chia_ompu_sdrc_gbpa	adhesion_chitinase-production	2	2759809	Colwellia sp. MB3u-64
GCA_005930805.1	19	['Foo1|A1X158', 'ompA|A0A3B6XXR4', 'HfaB|P27343', 'OmpU|P0C6Q6', 'tpbB|A0A0H2Z7X0', 'ompW|A0A0F4PBB9', 'pilF|A0A290TXQ9', 'HfsD|Q9A5L5', 'HfsG|Q9A5M0', 'HfsE|Q9A5M2', 'HfsH|Q9A5L9', 'yfiB|Q9I4L6', 'sipW|P54506', 'ChiA|P32823', 'HfsC|Q9A5L8', 'yfiR|Q9I4L4', 'HfsA|Q9A5L6', 'GbpA|C3LW75', 'SRFAD|Q08788']	7	hfacces_foo_chia_omp_yfi_ompu_gbpa	adhesion_chitinase-production	2	579569	Pseudoalteromonas sp. S981
GCA_001652585.1	12	['HfsD|Q9A5L5', 'OmpU|P0C6Q6', 'HfsF|Q9A5M1', 'HfsE|Q9A5M2', 'HfsG|Q9A5M0', 'sdrC|A0A6A8FED6', 'yfiB|Q9I4L6', 'sipW|P54506', 'ChiA|P32823', 'HfsC|Q9A5L8', 'HfaB|P27343', 'HfsA|Q9A5L6']	4	hfacces_chia_ompu_sdrc	adhesion_chitinase-production	2	999894	Thermosulfurimonas dismutans
GCA_014077065.1	18	['HfsD|Q9A5L5', 'OmpU|P0C6Q6', 'HfsF|Q9A5M1', 'HfsE|Q9A5M2', 'HfsH|Q9A5L9', 'HfsG|Q9A5M0', 'tpbB|A0A0H2Z7X0', 'sdrC|A0A6A8FED6', 'ompA|A0A3B6XXR4', 'yfiB|Q9I4L6', 'ompW|A0A0F4PBB9', 'pilF|A0A290TXQ9', 'sipW|P54506', 'ChiA|P32823', 'HfsC|Q9A5L8', 'HfaB|P27343', 'HfsA|Q9A5L6', 'SRFAD|Q08788']	6	hfs_hfacces_chia_omp_ompu_sdrc	adhesion_chitinase-production	2	2759822	Colwellia sp. MB3u-4
GCA_002082175.1	23	['SRFAB|Q04747', 'CHPC|Q9AD93', 'Foo1|A1X158', 'ompA|A0A3B6XXR4', 'CHPE|Q9X9Z2', 'SRFAA|P27206', 'CHPG|Q9KYH3', 'CHPA|Q8CJY7', 'HfsD|Q9A5L5', 'HfsF|Q9A5M1', 'HfsE|Q9A5M2', 'HfsG|Q9A5M0', 'HfsH|Q9A5L9', 'SRFAC|Q08787', 'yfiB|Q9I4L6', 'CHPF|Q9KYG7', 'CHPH|Q9AD92', 'sipW|P54506', 'HfsC|Q9A5L8', 'CHPB|Q9X7U2', 'CHPD|Q9L1J9', 'GbpA|C3LW75', 'SRFAD|Q08788']	4	srf_chp_foo_gbpa	drag-reducing_adhesion	2	1935	Streptomyces violaceoruber
GCA_001634835.1	17	['SRFAA|P27206', 'SRFAB|Q04747', 'HfsD|Q9A5L5', 'OmpU|P0C6Q6', 'HfsF|Q9A5M1', 'HfsE|Q9A5M2', 'HfsG|Q9A5M0', 'sdrC|A0A6A8FED6', 'ompA|A0A3B6XXR4', 'yfiB|Q9I4L6', 'ompW|A0A0F4PBB9', 'sipW|P54506', 'ChiA|P32823', 'HfsC|Q9A5L8', 'HfaB|P27343', 'HfsA|Q9A5L6', 'SRFAD|Q08788']	4	hfacces_chia_ompu_sdrc	adhesion_chitinase-production	2	1822228	Alcanivorax sp. HI0033
GCA_004212215.1	13	['HfsD|Q9A5L5', 'HfsF|Q9A5M1', 'HfsE|Q9A5M2', 'HfsH|Q9A5L9', 'HfsG|Q9A5M0', 'tpbB|A0A0H2Z7X0', 'sdrC|A0A6A8FED6', 'yfiB|Q9I4L6', 'sipW|P54506', 'ChiA|P32823', 'HfsC|Q9A5L8', 'HfsA|Q9A5L6', 'SRFAD|Q08788']	3	hfs_chia_sdrc	adhesion_chitinase-production	2	2294035	Leptolyngbya sp. LK
GCA_001303305.1	15	['HfsD|Q9A5L5', 'OmpU|P0C6Q6', 'HfsF|Q9A5M1', 'HfsE|Q9A5M2', 'HfsH|Q9A5L9', 'HfsG|Q9A5M0', 'yfiB|Q9I4L6', 'sipW|P54506', 'RbmC|A0A2S1ZSI6', 'ChiA|P32823', 'HfsC|Q9A5L8', 'HfaB|P27343', 'HfsA|Q9A5L6', 'Bap1|Q9KQW0', 'SRFAD|Q08788']	6	hfs_hfacces_chia_ompu_bap1_rbmc	adhesion_chitinase-production	2	1704024	Nitrospira bacterium SG8_35_1
GCA_002692965.1	19	['Foo1|A1X158', 'ompA|A0A3B6XXR4', 'OmpU|P0C6Q6', 'tpbB|A0A0H2Z7X0', 'ompW|A0A0F4PBB9', 'RbmC|A0A2S1ZSI6', 'Bap1|Q9KQW0', 'HfsD|Q9A5L5', 'HfsF|Q9A5M1', 'HfsE|Q9A5M2', 'HfsH|Q9A5L9', 'HfsG|Q9A5M0', 'yfiB|Q9I4L6', 'sipW|P54506', 'ChiA|P32823', 'HfsC|Q9A5L8', 'HfsA|Q9A5L6', 'sdrC|A0A6A8FED6', 'SRFAD|Q08788']	7	hfs_foo_chia_ompu_sdrc_bap1_rbmc	adhesion_chitinase-production	2	1932666	Haliea sp.
GCA_002699265.1	18	['HfsD|Q9A5L5', 'Foo1|A1X158', 'HfsF|Q9A5M1', 'HfsE|Q9A5M2', 'HfsH|Q9A5L9', 'HfsG|Q9A5M0', 'sdrC|A0A6A8FED6', 'ompA|A0A3B6XXR4', 'yfiB|Q9I4L6', 'ompW|A0A0F4PBB9', 'sipW|P54506', 'RbmC|A0A2S1ZSI6', 'ChiA|P32823', 'HfsC|Q9A5L8', 'HfaB|P27343', 'HfsA|Q9A5L6', 'Bap1|Q9KQW0', 'SRFAD|Q08788']	7	hfs_hfacces_foo_chia_sdrc_bap1_rbmc	adhesion_chitinase-production	2	1871037	Flavobacteriaceae bacterium
GCA_003025575.1	17	['HfsD|Q9A5L5', 'OmpU|P0C6Q6', 'HfsF|Q9A5M1', 'HfsE|Q9A5M2', 'HfsH|Q9A5L9', 'HfsG|Q9A5M0', 'tpbB|A0A0H2Z7X0', 'ompA|A0A3B6XXR4', 'yfiB|Q9I4L6', 'GbpA|C3LW75', 'sipW|P54506', 'ChiA|P32823', 'HfsC|Q9A5L8', 'yfiR|Q9I4L4', 'HfaB|P27343', 'HfsA|Q9A5L6', 'SRFAD|Q08788']	6	hfs_hfacces_chia_yfi_ompu_gbpa	adhesion_chitinase-production	2	754436	Photobacterium aphoticum
GCA_010681825.2	16	['HfsD|Q9A5L5', 'Foo1|A1X158', 'HfsF|Q9A5M1', 'HfsE|Q9A5M2', 'HfsH|Q9A5L9', 'HfsG|Q9A5M0', 'OmpU|P0C6Q6', 'tpbB|A0A0H2Z7X0', 'yfiB|Q9I4L6', 'sipW|P54506', 'RbmC|A0A2S1ZSI6', 'ChiA|P32823', 'HfsC|Q9A5L8', 'HfsA|Q9A5L6', 'Bap1|Q9KQW0', 'SRFAD|Q08788']	6	hfs_foo_chia_ompu_bap1_rbmc	adhesion_chitinase-production	2	2707525	Sulfuriroseicoccus oceanibius
GCA_004378355.1	14	['HfsD|Q9A5L5', 'OmpU|P0C6Q6', 'HfsF|Q9A5M1', 'HfsH|Q9A5L9', 'HfsG|Q9A5M0', 'tpbB|A0A0H2Z7X0', 'yfiB|Q9I4L6', 'ompW|A0A0F4PBB9', 'sipW|P54506', 'RbmC|A0A2S1ZSI6', 'ChiA|P32823', 'HfsC|Q9A5L8', 'Bap1|Q9KQW0', 'SRFAD|Q08788']	4	chia_ompu_bap1_rbmc	chitinase-production_adhesion	2	2555642	Psychromonas sp. RZ5
GCA_014163655.1	19	['Foo1|A1X158', 'ompA|A0A3B6XXR4', 'HfaB|P27343', 'OmpU|P0C6Q6', 'tpbB|A0A0H2Z7X0', 'ompW|A0A0F4PBB9', 'HfsD|Q9A5L5', 'HfsF|Q9A5M1', 'HfsE|Q9A5M2', 'HfsH|Q9A5L9', 'HfsG|Q9A5M0', 'yfiB|Q9I4L6', 'sipW|P54506', 'ChiA|P32823', 'HfsC|Q9A5L8', 'yfiR|Q9I4L4', 'HfsA|Q9A5L6', 'GbpA|C3LW75', 'SRFAD|Q08788']	7	hfs_hfacces_foo_chia_yfi_ompu_gbpa	adhesion_chitinase-production	2	2760932	Pseudoalteromonas sp. SR45-1
GCA_001913155.1	13	['HfsD|Q9A5L5', 'Foo1|A1X158', 'HfsF|Q9A5M1', 'HfsH|Q9A5L9', 'HfsG|Q9A5M0', 'tpbB|A0A0H2Z7X0', 'sdrC|A0A6A8FED6', 'yfiB|Q9I4L6', 'ompW|A0A0F4PBB9', 'sipW|P54506', 'ChiA|P32823', 'HfsC|Q9A5L8', 'HfsA|Q9A5L6']	3	foo_chia_sdrc	adhesion_chitinase-production	2	1836467	Maribacter hydrothermalis
GCA_000341895.1	17	['SRFAA|P27206', 'SRFAB|Q04747', 'HfsD|Q9A5L5', 'Foo1|A1X158', 'HfsF|Q9A5M1', 'HfsE|Q9A5M2', 'HfsG|Q9A5M0', 'HfsH|Q9A5L9', 'SRFAC|Q08787', 'yfiB|Q9I4L6', 'sipW|P54506', 'RbmC|A0A2S1ZSI6', 'HfsC|Q9A5L8', 'yfiR|Q9I4L4', 'HfsA|Q9A5L6', 'Bap1|Q9KQW0', 'SRFAD|Q08788']	5	srf_hfs_foo_bap1_rbmc	drag-reducing_adhesion	2	1322246	Pseudodesulfovibrio piezophilus
GCA_002685035.1	17	['HfsD|Q9A5L5', 'OmpU|P0C6Q6', 'HfsF|Q9A5M1', 'HfsE|Q9A5M2', 'HfsH|Q9A5L9', 'HfsG|Q9A5M0', 'sdrC|A0A6A8FED6', 'ompA|A0A3B6XXR4', 'yfiB|Q9I4L6', 'ompW|A0A0F4PBB9', 'pilF|A0A290TXQ9', 'sipW|P54506', 'ChiA|P32823', 'HfsC|Q9A5L8', 'yfiR|Q9I4L4', 'HfsA|Q9A5L6', 'SRFAD|Q08788']	5	hfs_chia_omp_ompu_sdrc	adhesion_chitinase-production	2	1916082	Alteromonadaceae bacterium
GCA_001697185.1	16	['HfsD|Q9A5L5', 'Foo1|A1X158', 'HfsF|Q9A5M1', 'HfsH|Q9A5L9', 'HfsG|Q9A5M0', 'tpbB|A0A0H2Z7X0', 'sdrC|A0A6A8FED6', 'ompA|A0A3B6XXR4', 'yfiB|Q9I4L6', 'sipW|P54506', 'RbmC|A0A2S1ZSI6', 'ChiA|P32823', 'HfsC|Q9A5L8', 'HfsA|Q9A5L6', 'Bap1|Q9KQW0', 'SRFAD|Q08788']	5	foo_chia_sdrc_bap1_rbmc	adhesion_chitinase-production	2	1790137	Wenyingzhuangia fucanilytica
GCA_900115205.1	15	['SRFAA|P27206', 'SRFAB|Q04747', 'HfsD|Q9A5L5', 'Foo1|A1X158', 'HfsF|Q9A5M1', 'HfsE|Q9A5M2', 'HfsG|Q9A5M0', 'OmpU|P0C6Q6', 'tpbB|A0A0H2Z7X0', 'yfiB|Q9I4L6', 'sipW|P54506', 'ChiA|P32823', 'HfsC|Q9A5L8', 'HfsA|Q9A5L6', 'SRFAD|Q08788']	3	foo_chia_ompu	adhesion_chitinase-production	2	400055	Robiginitalea myxolifaciens
GCA_002696525.1	11	['HfsD|Q9A5L5', 'HfsG|Q9A5M0', 'HfsE|Q9A5M2', 'HfsH|Q9A5L9', 'tpbB|A0A0H2Z7X0', 'yfiB|Q9I4L6', 'RbmC|A0A2S1ZSI6', 'ChiA|P32823', 'HfsA|Q9A5L6', 'Bap1|Q9KQW0', 'SRFAD|Q08788']	3	chia_bap1_rbmc	chitinase-production_adhesion	2	2026760	Candidatus Marinimicrobia bacterium
GCA_000267545.1	18	['SRFAA|P27206', 'SRFAB|Q04747', 'HfsD|Q9A5L5', 'OmpU|P0C6Q6', 'HfsG|Q9A5M0', 'HfsE|Q9A5M2', 'HfsH|Q9A5L9', 'ompA|A0A3B6XXR4', 'SRFAC|Q08787', 'yfiB|Q9I4L6', 'ompW|A0A0F4PBB9', 'sipW|P54506', 'RbmC|A0A2S1ZSI6', 'HfsC|Q9A5L8', 'HfaB|P27343', 'HfsA|Q9A5L6', 'Bap1|Q9KQW0', 'SRFAD|Q08788']	5	srf_hfacces_ompu_bap1_rbmc	drag-reducing_adhesion	2	1196835	Stutzerimonas stutzeri
GCA_002724285.1	9	['HfsG|Q9A5M0', 'HfsE|Q9A5M2', 'HfsH|Q9A5L9', 'sdrC|A0A6A8FED6', 'ompA|A0A3B6XXR4', 'yfiB|Q9I4L6', 'sipW|P54506', 'ChiA|P32823', 'HfsC|Q9A5L8']	2	chia_sdrc	chitinase-production_adhesion	2	2026801	Verrucomicrobiales bacterium
GCA_009711355.1	17	['SRFAA|P27206', 'SRFAB|Q04747', 'HfsD|Q9A5L5', 'Foo1|A1X158', 'HfsF|Q9A5M1', 'HfsE|Q9A5M2', 'HfsG|Q9A5M0', 'HfsH|Q9A5L9', 'OmpU|P0C6Q6', 'tpbB|A0A0H2Z7X0', 'SRFAC|Q08787', 'yfiB|Q9I4L6', 'ompW|A0A0F4PBB9', 'sipW|P54506', 'HfsC|Q9A5L8', 'HfsA|Q9A5L6', 'SRFAD|Q08788']	4	srf_hfs_foo_ompu	drag-reducing_adhesion	2	2529384	Roseibium sp. RKSG952
GCA_014163945.1	21	['Foo1|A1X158', 'ompA|A0A3B6XXR4', 'HfaB|P27343', 'OmpU|P0C6Q6', 'ompW|A0A0F4PBB9', 'RbmC|A0A2S1ZSI6', 'Bap1|Q9KQW0', 'pilF|A0A290TXQ9', 'HfsD|Q9A5L5', 'HfsF|Q9A5M1', 'HfsH|Q9A5L9', 'HfsG|Q9A5M0', 'yfiB|Q9I4L6', 'sipW|P54506', 'ChiA|P32823', 'HfsC|Q9A5L8', 'yfiR|Q9I4L4', 'HfsA|Q9A5L6', 'sdrC|A0A6A8FED6', 'GbpA|C3LW75', 'SRFAD|Q08788']	9	hfacces_foo_chia_omp_ompu_sdrc_bap1_rbmc_gbpa	adhesion_chitinase-production	2	2760948	Pseudoalteromonas sp. SR41-6
GCA_002722845.1	14	['HfsD|Q9A5L5', 'HfsF|Q9A5M1', 'HfsH|Q9A5L9', 'HfsG|Q9A5M0', 'tasA|P54507', 'yfiB|Q9I4L6', 'sipW|P54506', 'RbmC|A0A2S1ZSI6', 'ChiA|P32823', 'HfsC|Q9A5L8', 'HfaB|P27343', 'HfsA|Q9A5L6', 'Bap1|Q9KQW0', 'SRFAD|Q08788']	5	hfacces_chia_tapA_bap1_rbmc	adhesion_chitinase-production	2	2026763	Myxococcales bacterium
GCA_900100085.1	15	['SRFAA|P27206', 'SRFAB|Q04747', 'HfsD|Q9A5L5', 'Foo1|A1X158', 'HfsG|Q9A5M0', 'HfsH|Q9A5L9', 'OmpU|P0C6Q6', 'SRFAC|Q08787', 'yfiB|Q9I4L6', 'ompW|A0A0F4PBB9', 'sipW|P54506', 'RbmC|A0A2S1ZSI6', 'HfsA|Q9A5L6', 'Bap1|Q9KQW0', 'SRFAD|Q08788']	5	srf_foo_ompu_bap1_rbmc	drag-reducing_adhesion	2	555512	Salipiger marinus
GCA_014164245.1	18	['HfsD|Q9A5L5', 'Foo1|A1X158', 'HfsG|Q9A5M0', 'HfsE|Q9A5M2', 'HfsH|Q9A5L9', 'OmpU|P0C6Q6', 'tpbB|A0A0H2Z7X0', 'ompA|A0A3B6XXR4', 'yfiB|Q9I4L6', 'ompW|A0A0F4PBB9', 'GbpA|C3LW75', 'sipW|P54506', 'ChiA|P32823', 'HfsC|Q9A5L8', 'yfiR|Q9I4L4', 'HfaB|P27343', 'HfsA|Q9A5L6', 'SRFAD|Q08788']	6	hfacces_foo_chia_yfi_ompu_gbpa	adhesion_chitinase-production	2	2760965	Pseudoalteromonas sp. SG43-8
GCA_000764555.1	14	['HfsD|Q9A5L5', 'HfsG|Q9A5M0', 'HfsE|Q9A5M2', 'HfsH|Q9A5L9', 'tpbB|A0A0H2Z7X0', 'ompA|A0A3B6XXR4', 'yfiB|Q9I4L6', 'GbpA|C3LW75', 'sipW|P54506', 'RbmC|A0A2S1ZSI6', 'ChiA|P32823', 'HfsC|Q9A5L8', 'HfaB|P27343', 'Bap1|Q9KQW0']	5	hfacces_chia_bap1_rbmc_gbpa	adhesion_chitinase-production	2	1547445	Francisella sp. FSC1006
GCA_002876665.1	18	['HfsD|Q9A5L5', 'OmpU|P0C6Q6', 'HfsG|Q9A5M0', 'HfsH|Q9A5L9', 'ompA|A0A3B6XXR4', 'tpbB|A0A0H2Z7X0', 'yfiB|Q9I4L6', 'ompW|A0A0F4PBB9', 'GbpA|C3LW75', 'sipW|P54506', 'RbmC|A0A2S1ZSI6', 'ChiA|P32823', 'HfsC|Q9A5L8', 'yfiR|Q9I4L4', 'HfaB|P27343', 'HfsA|Q9A5L6', 'Bap1|Q9KQW0', 'SRFAD|Q08788']	7	hfacces_chia_yfi_ompu_bap1_rbmc_gbpa	adhesion_chitinase-production	2	1884471	Vibrio sp. 10N.222.55.F9
GCA_001304075.1	16	['HfsD|Q9A5L5', 'HfsF|Q9A5M1', 'HfsE|Q9A5M2', 'HfsH|Q9A5L9', 'HfsG|Q9A5M0', 'tpbB|A0A0H2Z7X0', 'sdrC|A0A6A8FED6', 'ompA|A0A3B6XXR4', 'yfiB|Q9I4L6', 'pilF|A0A290TXQ9', 'RbmC|A0A2S1ZSI6', 'ChiA|P32823', 'HfsC|Q9A5L8', 'HfsA|Q9A5L6', 'Bap1|Q9KQW0', 'SRFAD|Q08788']	5	hfs_chia_sdrc_bap1_rbmc	adhesion_chitinase-production	2	1703761	candidate division BRC1 bacterium SM23_51
GCA_001855515.1	15	['SRFAA|P27206', 'SRFAB|Q04747', 'HfsD|Q9A5L5', 'Foo1|A1X158', 'HfsF|Q9A5M1', 'HfsE|Q9A5M2', 'HfsG|Q9A5M0', 'HfsH|Q9A5L9', 'tpbB|A0A0H2Z7X0', 'SRFAC|Q08787', 'GbpA|C3LW75', 'sipW|P54506', 'HfsC|Q9A5L8', 'HfsA|Q9A5L6', 'SRFAD|Q08788']	4	srf_hfs_foo_gbpa	drag-reducing_adhesion	2	1172030	Micromonospora sp. WMMB235
GCA_002726175.1	14	['HfsD|Q9A5L5', 'OmpU|P0C6Q6', 'HfsF|Q9A5M1', 'HfsE|Q9A5M2', 'HfsH|Q9A5L9', 'HfsG|Q9A5M0', 'sdrC|A0A6A8FED6', 'yfiB|Q9I4L6', 'sipW|P54506', 'ChiA|P32823', 'HfsC|Q9A5L8', 'HfaB|P27343', 'HfsA|Q9A5L6', 'SRFAD|Q08788']	5	hfs_hfacces_chia_ompu_sdrc	adhesion_chitinase-production	2	1872390	Aequorivita sp.
GCA_002703645.1	14	['HfsD|Q9A5L5', 'HfsF|Q9A5M1', 'HfsE|Q9A5M2', 'HfsH|Q9A5L9', 'HfsG|Q9A5M0', 'sdrC|A0A6A8FED6', 'SRFAC|Q08787', 'yfiB|Q9I4L6', 'sipW|P54506', 'RbmC|A0A2S1ZSI6', 'ChiA|P32823', 'HfsC|Q9A5L8', 'HfsA|Q9A5L6', 'Bap1|Q9KQW0']	5	hfs_chia_sdrc_bap1_rbmc	adhesion_chitinase-production	2	2026760	Candidatus Marinimicrobia bacterium
GCA_001303205.1	16	['SRFAA|P27206', 'SRFAB|Q04747', 'HfsD|Q9A5L5', 'OmpU|P0C6Q6', 'HfsF|Q9A5M1', 'HfsG|Q9A5M0', 'HfsH|Q9A5L9', 'tpbB|A0A0H2Z7X0', 'yfiB|Q9I4L6', 'ompW|A0A0F4PBB9', 'sipW|P54506', 'RbmC|A0A2S1ZSI6', 'ChiA|P32823', 'HfsC|Q9A5L8', 'Bap1|Q9KQW0', 'SRFAD|Q08788']	4	chia_ompu_bap1_rbmc	chitinase-production_adhesion	2	1704023	Nitrospira bacterium SG8_3
GCA_009363375.1	15	['SRFAA|P27206', 'SRFAB|Q04747', 'HfsD|Q9A5L5', 'Foo1|A1X158', 'HfsF|Q9A5M1', 'HfsE|Q9A5M2', 'HfsG|Q9A5M0', 'HfsH|Q9A5L9', 'tpbB|A0A0H2Z7X0', 'SRFAC|Q08787', 'yfiB|Q9I4L6', 'sipW|P54506', 'HfsC|Q9A5L8', 'HfsA|Q9A5L6', 'SRFAD|Q08788']	3	srf_hfs_foo	drag-reducing_adhesion	2	2587864	Labrenzia sp. THAF187b
GCA_002700185.1	17	['SRFAA|P27206', 'SRFAB|Q04747', 'HfsD|Q9A5L5', 'Foo1|A1X158', 'HfsF|Q9A5M1', 'HfsG|Q9A5M0', 'HfsH|Q9A5L9', 'OmpU|P0C6Q6', 'sdrC|A0A6A8FED6', 'ompA|A0A3B6XXR4', 'yfiB|Q9I4L6', 'sipW|P54506', 'ChiA|P32823', 'HfsC|Q9A5L8', 'HfaB|P27343', 'HfsA|Q9A5L6', 'SRFAD|Q08788']	5	hfacces_foo_chia_ompu_sdrc	adhesion_chitinase-production	2	2024854	Pseudozobellia sp.
GCA_002730045.1	15	['HfsD|Q9A5L5', 'OmpU|P0C6Q6', 'HfsF|Q9A5M1', 'HfsE|Q9A5M2', 'HfsG|Q9A5M0', 'tpbB|A0A0H2Z7X0', 'yfiB|Q9I4L6', 'sipW|P54506', 'RbmC|A0A2S1ZSI6', 'ChiA|P32823', 'HfsC|Q9A5L8', 'HfaB|P27343', 'HfsA|Q9A5L6', 'Bap1|Q9KQW0', 'SRFAD|Q08788']	5	hfacces_chia_ompu_bap1_rbmc	adhesion_chitinase-production	2	2026794	Sutterellaceae bacterium
GCA_002707765.1	13	['SRFAA|P27206', 'SRFAB|Q04747', 'HfsG|Q9A5M0', 'HfsE|Q9A5M2', 'sdrC|A0A6A8FED6', 'ompA|A0A3B6XXR4', 'sipW|P54506', 'RbmC|A0A2S1ZSI6', 'ChiA|P32823', 'HfsC|Q9A5L8', 'HfsA|Q9A5L6', 'Bap1|Q9KQW0', 'pilF|A0A290TXQ9']	4	chia_sdrc_bap1_rbmc	chitinase-production_adhesion	2	2026760	Candidatus Marinimicrobia bacterium
GCA_002875705.1	20	['SRFAB|Q04747', 'ompA|A0A3B6XXR4', 'HfaB|P27343', 'SRFAA|P27206', 'OmpU|P0C6Q6', 'tpbB|A0A0H2Z7X0', 'ompW|A0A0F4PBB9', 'RbmC|A0A2S1ZSI6', 'Bap1|Q9KQW0', 'HfsD|Q9A5L5', 'HfsG|Q9A5M0', 'HfsH|Q9A5L9', 'yfiB|Q9I4L6', 'sipW|P54506', 'ChiA|P32823', 'HfsC|Q9A5L8', 'yfiR|Q9I4L4', 'HfsA|Q9A5L6', 'GbpA|C3LW75', 'SRFAD|Q08788']	7	hfacces_chia_yfi_ompu_bap1_rbmc_gbpa	adhesion_chitinase-production	2	1880844	Vibrio sp. 10N.261.45.E2
GCA_002710685.1	15	['HfsD|Q9A5L5', 'HfsF|Q9A5M1', 'HfsE|Q9A5M2', 'HfsH|Q9A5L9', 'HfsG|Q9A5M0', 'sdrC|A0A6A8FED6', 'ompA|A0A3B6XXR4', 'yfiB|Q9I4L6', 'sipW|P54506', 'ChiA|P32823', 'HfsC|Q9A5L8', 'yfiR|Q9I4L4', 'HfaB|P27343', 'HfsA|Q9A5L6', 'SRFAD|Q08788']	4	hfs_hfacces_chia_sdrc	adhesion_chitinase-production	2	2026729	Cytophagaceae bacterium
GCA_002711995.1	14	['SRFAA|P27206', 'SRFAB|Q04747', 'HfsD|Q9A5L5', 'Foo1|A1X158', 'HfsG|Q9A5M0', 'HfsE|Q9A5M2', 'HfsH|Q9A5L9', 'OmpU|P0C6Q6', 'SRFAC|Q08787', 'yfiB|Q9I4L6', 'sipW|P54506', 'HfsC|Q9A5L8', 'HfaB|P27343', 'SRFAD|Q08788']	4	srf_hfacces_foo_ompu	drag-reducing_adhesion	2	2026745	Halobacteriovoraceae bacterium
GCA_002685475.1	11	['SRFAA|P27206', 'SRFAB|Q04747', 'HfsF|Q9A5M1', 'HfsG|Q9A5M0', 'tpbB|A0A0H2Z7X0', 'yfiB|Q9I4L6', 'ompW|A0A0F4PBB9', 'RbmC|A0A2S1ZSI6', 'ChiA|P32823', 'Bap1|Q9KQW0', 'SRFAD|Q08788']	3	chia_bap1_rbmc	chitinase-production_adhesion	2	2026740	Flammeovirgaceae bacterium
GCA_007859935.1	15	['SRFAA|P27206', 'SRFAB|Q04747', 'HfsD|Q9A5L5', 'HfsF|Q9A5M1', 'HfsE|Q9A5M2', 'HfsG|Q9A5M0', 'HfsH|Q9A5L9', 'sdrC|A0A6A8FED6', 'SRFAC|Q08787', 'yfiB|Q9I4L6', 'sipW|P54506', 'HfsC|Q9A5L8', 'yfiR|Q9I4L4', 'HfsA|Q9A5L6', 'SRFAD|Q08788']	3	srf_hfs_sdrc	drag-reducing_adhesion	2	2528002	Posidoniimonas polymericola
GCA_002701115.1	9	['HfsD|Q9A5L5', 'HfsF|Q9A5M1', 'HfsE|Q9A5M2', 'HfsG|Q9A5M0', 'sdrC|A0A6A8FED6', 'yfiB|Q9I4L6', 'sipW|P54506', 'ChiA|P32823', 'SRFAD|Q08788']	2	chia_sdrc	chitinase-production_adhesion	2	2026754	Legionellales bacterium
GCA_002714565.1	8	['HfsG|Q9A5M0', 'HfsE|Q9A5M2', 'HfsH|Q9A5L9', 'sdrC|A0A6A8FED6', 'sipW|P54506', 'ChiA|P32823', 'HfsC|Q9A5L8', 'HfaB|P27343']	3	hfacces_chia_sdrc	adhesion_chitinase-production	2	2024855	Rhodopirellula sp.
GCA_002714325.1	14	['HfsD|Q9A5L5', 'HfsF|Q9A5M1', 'HfsH|Q9A5L9', 'HfsG|Q9A5M0', 'tpbB|A0A0H2Z7X0', 'yfiB|Q9I4L6', 'sipW|P54506', 'RbmC|A0A2S1ZSI6', 'ChiA|P32823', 'HfsC|Q9A5L8', 'yfiR|Q9I4L4', 'HfsA|Q9A5L6', 'Bap1|Q9KQW0', 'SRFAD|Q08788']	4	chia_yfi_bap1_rbmc	chitinase-production_adhesion	2	2026728	Crocinitomicaceae bacterium
GCA_014076985.1	19	['Foo1|A1X158', 'ompA|A0A3B6XXR4', 'HfaB|P27343', 'OmpU|P0C6Q6', 'tpbB|A0A0H2Z7X0', 'ompW|A0A0F4PBB9', 'pilF|A0A290TXQ9', 'HfsD|Q9A5L5', 'HfsF|Q9A5M1', 'HfsE|Q9A5M2', 'HfsH|Q9A5L9', 'HfsG|Q9A5M0', 'yfiB|Q9I4L6', 'sipW|P54506', 'ChiA|P32823', 'HfsC|Q9A5L8', 'yfiR|Q9I4L4', 'HfsA|Q9A5L6', 'SRFAD|Q08788']	7	hfs_hfacces_foo_chia_omp_yfi_ompu	adhesion_chitinase-production	2	2759818	Colwellia sp. MB3u-8
GCA_014076995.1	17	['HfsD|Q9A5L5', 'OmpU|P0C6Q6', 'HfsF|Q9A5M1', 'HfsH|Q9A5L9', 'HfsG|Q9A5M0', 'tpbB|A0A0H2Z7X0', 'sdrC|A0A6A8FED6', 'ompA|A0A3B6XXR4', 'yfiB|Q9I4L6', 'ompW|A0A0F4PBB9', 'pilF|A0A290TXQ9', 'sipW|P54506', 'ChiA|P32823', 'HfsC|Q9A5L8', 'HfaB|P27343', 'HfsA|Q9A5L6', 'SRFAD|Q08788']	5	hfacces_chia_omp_ompu_sdrc	adhesion_chitinase-production	2	2759821	Colwellia sp. MB3u-43
GCA_002876705.1	17	['HfsD|Q9A5L5', 'OmpU|P0C6Q6', 'HfsF|Q9A5M1', 'HfsE|Q9A5M2', 'HfsH|Q9A5L9', 'HfsG|Q9A5M0', 'ompA|A0A3B6XXR4', 'yfiB|Q9I4L6', 'GbpA|C3LW75', 'sipW|P54506', 'ChiA|P32823', 'HfsC|Q9A5L8', 'yfiR|Q9I4L4', 'HfaB|P27343', 'HfsA|Q9A5L6', 'Bap1|Q9KQW0', 'SRFAD|Q08788']	6	hfs_hfacces_chia_ompu_bap1_gbpa	adhesion_chitinase-production	2	188144	Enterovibrio norvegicus
GCA_002712565.1	10	['HfsD|Q9A5L5', 'HfsF|Q9A5M1', 'HfsE|Q9A5M2', 'HfsH|Q9A5L9', 'HfsG|Q9A5M0', 'sdrC|A0A6A8FED6', 'yfiB|Q9I4L6', 'sipW|P54506', 'ChiA|P32823', 'SRFAD|Q08788']	2	chia_sdrc	chitinase-production_adhesion	2	2026742	Gemmatimonadetes bacterium
GCA_004376845.1	15	['HfsD|Q9A5L5', 'OmpU|P0C6Q6', 'HfsF|Q9A5M1', 'HfsE|Q9A5M2', 'HfsH|Q9A5L9', 'HfsG|Q9A5M0', 'tpbB|A0A0H2Z7X0', 'yfiB|Q9I4L6', 'sipW|P54506', 'RbmC|A0A2S1ZSI6', 'ChiA|P32823', 'HfsC|Q9A5L8', 'HfsA|Q9A5L6', 'Bap1|Q9KQW0', 'SRFAD|Q08788']	5	hfs_chia_ompu_bap1_rbmc	adhesion_chitinase-production	2	2555643	Psychromonas sp. RZ22
GCA_002712905.1	13	['SRFAA|P27206', 'SRFAB|Q04747', 'HfsD|Q9A5L5', 'Foo1|A1X158', 'HfsF|Q9A5M1', 'HfsG|Q9A5M0', 'HfsH|Q9A5L9', 'SRFAC|Q08787', 'yfiB|Q9I4L6', 'GbpA|C3LW75', 'sipW|P54506', 'ChiA|P32823', 'HfsA|Q9A5L6']	3	foo_chia_gbpa	adhesion_chitinase-production	2	2026800	Verrucomicrobiaceae bacterium
GCA_002700465.1	10	['SRFAA|P27206', 'SRFAB|Q04747', 'HfsF|Q9A5M1', 'HfsG|Q9A5M0', 'sdrC|A0A6A8FED6', 'ompA|A0A3B6XXR4', 'SRFAC|Q08787', 'sipW|P54506', 'ChiA|P32823', 'HfsC|Q9A5L8']	2	chia_sdrc	chitinase-production_adhesion	2	1871037	Flavobacteriaceae bacterium
GCA_000310105.2	20	['SRFAB|Q04747', 'Foo1|A1X158', 'ompA|A0A3B6XXR4', 'HfaB|P27343', 'SRFAA|P27206', 'OmpU|P0C6Q6', 'tpbB|A0A0H2Z7X0', 'ompW|A0A0F4PBB9', 'HfsD|Q9A5L5', 'HfsG|Q9A5M0', 'HfsH|Q9A5L9', 'yfiB|Q9I4L6', 'sipW|P54506', 'ChiA|P32823', 'HfsC|Q9A5L8', 'yfiR|Q9I4L4', 'HfsA|Q9A5L6', 'sdrC|A0A6A8FED6', 'GbpA|C3LW75', 'SRFAD|Q08788']	7	hfacces_foo_chia_yfi_ompu_sdrc_gbpa	adhesion_chitinase-production	2	283699	Pseudoalteromonas sp. Bsw20308
GCA_002702315.1	13	['SRFAA|P27206', 'SRFAB|Q04747', 'HfsD|Q9A5L5', 'OmpU|P0C6Q6', 'HfsF|Q9A5M1', 'sdrC|A0A6A8FED6', 'ompA|A0A3B6XXR4', 'tpbB|A0A0H2Z7X0', 'yfiB|Q9I4L6', 'RbmC|A0A2S1ZSI6', 'ChiA|P32823', 'Bap1|Q9KQW0', 'SRFAD|Q08788']	5	chia_ompu_sdrc_bap1_rbmc	chitinase-production_adhesion	2	2024888	SAR116 cluster bacterium
GCA_008064665.1	18	['HfsD|Q9A5L5', 'OmpU|P0C6Q6', 'HfsG|Q9A5M0', 'HfsE|Q9A5M2', 'HfsH|Q9A5L9', 'tpbB|A0A0H2Z7X0', 'tasA|P54507', 'ompA|A0A3B6XXR4', 'yfiB|Q9I4L6', 'ompW|A0A0F4PBB9', 'sipW|P54506', 'RbmC|A0A2S1ZSI6', 'ChiA|P32823', 'HfsC|Q9A5L8', 'yfiR|Q9I4L4', 'HfsA|Q9A5L6', 'Bap1|Q9KQW0', 'SRFAD|Q08788']	6	chia_tapA_yfi_ompu_bap1_rbmc	chitinase-production_adhesion	2	1852021	Parahaliea aestuarii
GCA_002720355.1	10	['HfsD|Q9A5L5', 'HfsF|Q9A5M1', 'HfsE|Q9A5M2', 'HfsG|Q9A5M0', 'sdrC|A0A6A8FED6', 'yfiB|Q9I4L6', 'sipW|P54506', 'ChiA|P32823', 'HfsC|Q9A5L8', 'HfsA|Q9A5L6']	2	chia_sdrc	chitinase-production_adhesion	2	2026801	Verrucomicrobiales bacterium
GCA_001304355.1	15	['SRFAA|P27206', 'SRFAB|Q04747', 'HfsD|Q9A5L5', 'HfsF|Q9A5M1', 'HfsE|Q9A5M2', 'HfsG|Q9A5M0', 'HfsH|Q9A5L9', 'tpbB|A0A0H2Z7X0', 'sdrC|A0A6A8FED6', 'SRFAC|Q08787', 'sipW|P54506', 'ChiA|P32823', 'HfsC|Q9A5L8', 'HfaB|P27343', 'HfsA|Q9A5L6']	4	hfs_hfacces_chia_sdrc	adhesion_chitinase-production	2	1703415	Planctomycetes bacterium DG_58
GCA_014164295.1	21	['Foo1|A1X158', 'ompA|A0A3B6XXR4', 'HfaB|P27343', 'OmpU|P0C6Q6', 'ompW|A0A0F4PBB9', 'RbmC|A0A2S1ZSI6', 'Bap1|Q9KQW0', 'pilF|A0A290TXQ9', 'HfsD|Q9A5L5', 'HfsF|Q9A5M1', 'HfsH|Q9A5L9', 'HfsG|Q9A5M0', 'yfiB|Q9I4L6', 'sipW|P54506', 'ChiA|P32823', 'HfsC|Q9A5L8', 'yfiR|Q9I4L4', 'HfsA|Q9A5L6', 'sdrC|A0A6A8FED6', 'GbpA|C3LW75', 'SRFAD|Q08788']	9	hfacces_foo_chia_omp_ompu_sdrc_bap1_rbmc_gbpa	adhesion_chitinase-production	2	2760966	Pseudoalteromonas sp. SG43-7
GCA_001302835.1	13	['HfsD|Q9A5L5', 'OmpU|P0C6Q6', 'HfsF|Q9A5M1', 'HfsH|Q9A5L9', 'HfsG|Q9A5M0', 'sdrC|A0A6A8FED6', 'ompA|A0A3B6XXR4', 'RbmC|A0A2S1ZSI6', 'ChiA|P32823', 'HfsC|Q9A5L8', 'HfsA|Q9A5L6', 'Bap1|Q9KQW0', 'pilF|A0A290TXQ9']	5	chia_ompu_sdrc_bap1_rbmc	chitinase-production_adhesion	2	1703770	candidate division TA06 bacterium DG_24
GCA_002723655.1	18	['HfsD|Q9A5L5', 'OmpU|P0C6Q6', 'HfsF|Q9A5M1', 'HfsE|Q9A5M2', 'HfsH|Q9A5L9', 'HfsG|Q9A5M0', 'tpbB|A0A0H2Z7X0', 'ompA|A0A3B6XXR4', 'yfiB|Q9I4L6', 'ompW|A0A0F4PBB9', 'sipW|P54506', 'RbmC|A0A2S1ZSI6', 'ChiA|P32823', 'HfsC|Q9A5L8', 'HfaB|P27343', 'HfsA|Q9A5L6', 'Bap1|Q9KQW0', 'SRFAD|Q08788']	6	hfs_hfacces_chia_ompu_bap1_rbmc	adhesion_chitinase-production	2	1930536	Sphingomonadaceae bacterium
GCA_003076275.1	19	['SRFAB|Q04747', 'Foo1|A1X158', 'HfaB|P27343', 'SRFAA|P27206', 'OmpU|P0C6Q6', 'ompW|A0A0F4PBB9', 'HfsD|Q9A5L5', 'HfsF|Q9A5M1', 'HfsE|Q9A5M2', 'HfsG|Q9A5M0', 'HfsH|Q9A5L9', 'SRFAC|Q08787', 'yfiB|Q9I4L6', 'sipW|P54506', 'HfsC|Q9A5L8', 'yfiR|Q9I4L4', 'sdrC|A0A6A8FED6', 'GbpA|C3LW75', 'SRFAD|Q08788']	6	srf_hfacces_foo_ompu_sdrc_gbpa	drag-reducing_adhesion	2	359370	Microbulbifer sp. A4B17
GCA_002685935.1	14	['SRFAA|P27206', 'SRFAB|Q04747', 'HfsD|Q9A5L5', 'HfsF|Q9A5M1', 'HfsE|Q9A5M2', 'HfsG|Q9A5M0', 'HfsH|Q9A5L9', 'sdrC|A0A6A8FED6', 'ompA|A0A3B6XXR4', 'SRFAC|Q08787', 'yfiB|Q9I4L6', 'sipW|P54506', 'HfsC|Q9A5L8', 'SRFAD|Q08788']	2	srf_sdrc	drag-reducing_adhesion	2	2026779	Planctomycetaceae bacterium
GCA_001302865.1	16	['SRFAA|P27206', 'SRFAB|Q04747', 'HfsD|Q9A5L5', 'HfsF|Q9A5M1', 'HfsE|Q9A5M2', 'HfsG|Q9A5M0', 'HfsH|Q9A5L9', 'tpbB|A0A0H2Z7X0', 'SRFAC|Q08787', 'yfiB|Q9I4L6', 'sipW|P54506', 'RbmC|A0A2S1ZSI6', 'ChiA|P32823', 'HfsC|Q9A5L8', 'HfsA|Q9A5L6', 'Bap1|Q9KQW0']	4	hfs_chia_bap1_rbmc	adhesion_chitinase-production	2	1703354	Coxiella sp. DG_40
GCA_002684575.1	11	['HfsD|Q9A5L5', 'HfsF|Q9A5M1', 'HfsH|Q9A5L9', 'HfsG|Q9A5M0', 'tpbB|A0A0H2Z7X0', 'sdrC|A0A6A8FED6', 'yfiB|Q9I4L6', 'sipW|P54506', 'ChiA|P32823', 'HfsC|Q9A5L8', 'HfsA|Q9A5L6']	2	chia_sdrc	chitinase-production_adhesion	2	2026801	Verrucomicrobiales bacterium
GCA_002713265.1	10	['HfsD|Q9A5L5', 'HfsF|Q9A5M1', 'HfsE|Q9A5M2', 'HfsG|Q9A5M0', 'tpbB|A0A0H2Z7X0', 'sdrC|A0A6A8FED6', 'yfiB|Q9I4L6', 'sipW|P54506', 'ChiA|P32823', 'HfsC|Q9A5L8']	2	chia_sdrc	chitinase-production_adhesion	2	1978231	Acidobacteria bacterium
GCA_002697595.1	11	['HfsD|Q9A5L5', 'HfsF|Q9A5M1', 'HfsE|Q9A5M2', 'HfsG|Q9A5M0', 'tpbB|A0A0H2Z7X0', 'RbmC|A0A2S1ZSI6', 'ChiA|P32823', 'HfsC|Q9A5L8', 'HfsA|Q9A5L6', 'Bap1|Q9KQW0', 'pilF|A0A290TXQ9']	3	chia_bap1_rbmc	chitinase-production_adhesion	2	2026760	Candidatus Marinimicrobia bacterium
GCA_001303415.1	12	['HfsD|Q9A5L5', 'HfsF|Q9A5M1', 'HfsE|Q9A5M2', 'HfsH|Q9A5L9', 'HfsG|Q9A5M0', 'tpbB|A0A0H2Z7X0', 'sdrC|A0A6A8FED6', 'yfiB|Q9I4L6', 'sipW|P54506', 'ChiA|P32823', 'HfsA|Q9A5L6', 'SRFAD|Q08788']	2	chia_sdrc	chitinase-production_adhesion	2	1703407	Myxococcales bacterium SG8_38
GCA_014077045.1	19	['Foo1|A1X158', 'ompA|A0A3B6XXR4', 'HfaB|P27343', 'OmpU|P0C6Q6', 'tpbB|A0A0H2Z7X0', 'ompW|A0A0F4PBB9', 'pilF|A0A290TXQ9', 'HfsD|Q9A5L5', 'HfsF|Q9A5M1', 'HfsE|Q9A5M2', 'HfsH|Q9A5L9', 'HfsG|Q9A5M0', 'yfiB|Q9I4L6', 'sipW|P54506', 'ChiA|P32823', 'HfsC|Q9A5L8', 'yfiR|Q9I4L4', 'HfsA|Q9A5L6', 'SRFAD|Q08788']	7	hfs_hfacces_foo_chia_omp_yfi_ompu	adhesion_chitinase-production	2	2759819	Colwellia sp. MB3u-70
GCA_005518135.1	12	['HfsD|Q9A5L5', 'OmpU|P0C6Q6', 'HfsF|Q9A5M1', 'HfsH|Q9A5L9', 'HfsG|Q9A5M0', 'yfiB|Q9I4L6', 'ompW|A0A0F4PBB9', 'sipW|P54506', 'ChiA|P32823', 'HfsC|Q9A5L8', 'HfsA|Q9A5L6', 'SRFAD|Q08788']	2	chia_ompu	chitinase-production_adhesion	2	420403	Pelagicola litoralis
GCA_002684115.1	7	['OmpU|P0C6Q6', 'HfsF|Q9A5M1', 'HfsH|Q9A5L9', 'HfsG|Q9A5M0', 'yfiB|Q9I4L6', 'ChiA|P32823', 'SRFAD|Q08788']	2	chia_ompu	chitinase-production_adhesion	2	53249	Pseudoalteromonas sp.
GCA_002994615.1	19	['SRFAB|Q04747', 'Foo1|A1X158', 'ompA|A0A3B6XXR4', 'HfaB|P27343', 'SRFAA|P27206', 'RbmC|A0A2S1ZSI6', 'Bap1|Q9KQW0', 'HfsD|Q9A5L5', 'HfsF|Q9A5M1', 'HfsE|Q9A5M2', 'HfsG|Q9A5M0', 'HfsH|Q9A5L9', 'yfiB|Q9I4L6', 'sipW|P54506', 'ChiA|P32823', 'HfsC|Q9A5L8', 'HfsA|Q9A5L6', 'sdrC|A0A6A8FED6', 'SRFAD|Q08788']	7	hfs_hfacces_foo_chia_sdrc_bap1_rbmc	adhesion_chitinase-production	2	215803	Enhygromyxa salina
GCA_001303705.1	14	['HfsD|Q9A5L5', 'OmpU|P0C6Q6', 'HfsF|Q9A5M1', 'HfsH|Q9A5L9', 'HfsG|Q9A5M0', 'sdrC|A0A6A8FED6', 'yfiB|Q9I4L6', 'sipW|P54506', 'RbmC|A0A2S1ZSI6', 'ChiA|P32823', 'HfsC|Q9A5L8', 'HfaB|P27343', 'HfsA|Q9A5L6', 'Bap1|Q9KQW0']	6	hfacces_chia_ompu_sdrc_bap1_rbmc	adhesion_chitinase-production	2	1703774	candidate division TA06 bacterium SM23_40
GCA_000738435.1	9	['HfsD|Q9A5L5', 'OmpU|P0C6Q6', 'HfsG|Q9A5M0', 'HfsH|Q9A5L9', 'yfiB|Q9I4L6', 'sipW|P54506', 'ChiA|P32823', 'HfsA|Q9A5L6', 'SRFAD|Q08788']	2	chia_ompu	chitinase-production_adhesion	2	666509	Planktomarina temperata
GCA_014270105.1	15	['SRFAA|P27206', 'SRFAB|Q04747', 'HfsD|Q9A5L5', 'Foo1|A1X158', 'HfsF|Q9A5M1', 'HfsE|Q9A5M2', 'HfsG|Q9A5M0', 'HfsH|Q9A5L9', 'sdrC|A0A6A8FED6', 'SRFAC|Q08787', 'yfiB|Q9I4L6', 'sipW|P54506', 'HfsC|Q9A5L8', 'HfsA|Q9A5L6', 'SRFAD|Q08788']	4	srf_hfs_foo_sdrc	drag-reducing_adhesion	2	2762758	Hyunsoonleella aquatilis
GCA_002708665.1	12	['HfsD|Q9A5L5', 'OmpU|P0C6Q6', 'HfsG|Q9A5M0', 'HfsE|Q9A5M2', 'HfsH|Q9A5L9', 'tpbB|A0A0H2Z7X0', 'yfiB|Q9I4L6', 'pilF|A0A290TXQ9', 'ChiA|P32823', 'HfsC|Q9A5L8', 'HfsA|Q9A5L6', 'SRFAD|Q08788']	2	chia_ompu	chitinase-production_adhesion	2	2026788	Rickettsiales bacterium
GCA_002723015.1	14	['HfsD|Q9A5L5', 'Foo1|A1X158', 'HfsF|Q9A5M1', 'HfsE|Q9A5M2', 'HfsH|Q9A5L9', 'HfsG|Q9A5M0', 'tpbB|A0A0H2Z7X0', 'sdrC|A0A6A8FED6', 'yfiB|Q9I4L6', 'sipW|P54506', 'ChiA|P32823', 'HfsC|Q9A5L8', 'HfsA|Q9A5L6', 'SRFAD|Q08788']	4	hfs_foo_chia_sdrc	adhesion_chitinase-production	2	2024856	Roseibacillus sp.
GCA_001690945.1	17	['HfsD|Q9A5L5', 'OmpU|P0C6Q6', 'HfsF|Q9A5M1', 'HfsE|Q9A5M2', 'HfsH|Q9A5L9', 'HfsG|Q9A5M0', 'tpbB|A0A0H2Z7X0', 'ompA|A0A3B6XXR4', 'yfiB|Q9I4L6', 'GbpA|C3LW75', 'sipW|P54506', 'ChiA|P32823', 'HfsC|Q9A5L8', 'yfiR|Q9I4L4', 'HfaB|P27343', 'HfsA|Q9A5L6', 'SRFAD|Q08788']	6	hfs_hfacces_chia_yfi_ompu_gbpa	adhesion_chitinase-production	2	668	Aliivibrio fischeri
GCA_002689135.1	8	['SRFAA|P27206', 'SRFAB|Q04747', 'Foo1|A1X158', 'sipW|P54506', 'RbmC|A0A2S1ZSI6', 'ChiA|P32823', 'Bap1|Q9KQW0', 'SRFAD|Q08788']	4	foo_chia_bap1_rbmc	adhesion_chitinase-production	2	2026782	Porticoccaceae bacterium
GCA_002701375.1	13	['bslA|P71014', 'HfsD|Q9A5L5', 'HfsF|Q9A5M1', 'HfsE|Q9A5M2', 'bslB|P39632', 'HfsG|Q9A5M0', 'tpbB|A0A0H2Z7X0', 'ompA|A0A3B6XXR4', 'sipW|P54506', 'ChiA|P32823', 'HfsC|Q9A5L8', 'HfsA|Q9A5L6', 'SRFAD|Q08788']	2	bsl_chia	drag-reducing_chitinase-production	2	2024872	Cyanobium sp. NAT70
GCA_002698365.1	14	['SRFAA|P27206', 'SRFAB|Q04747', 'Foo1|A1X158', 'HfsG|Q9A5M0', 'HfsE|Q9A5M2', 'HfsH|Q9A5L9', 'tpbB|A0A0H2Z7X0', 'yfiB|Q9I4L6', 'RbmC|A0A2S1ZSI6', 'ChiA|P32823', 'HfsC|Q9A5L8', 'HfsA|Q9A5L6', 'Bap1|Q9KQW0', 'SRFAD|Q08788']	4	foo_chia_bap1_rbmc	adhesion_chitinase-production	2	2021391	Flavobacteriales bacterium
GCA_002727005.1	14	['HfsD|Q9A5L5', 'HfsF|Q9A5M1', 'HfsE|Q9A5M2', 'HfsH|Q9A5L9', 'HfsG|Q9A5M0', 'sdrC|A0A6A8FED6', 'yfiB|Q9I4L6', 'sipW|P54506', 'RbmC|A0A2S1ZSI6', 'ChiA|P32823', 'HfsC|Q9A5L8', 'HfsA|Q9A5L6', 'Bap1|Q9KQW0', 'SRFAD|Q08788']	5	hfs_chia_sdrc_bap1_rbmc	adhesion_chitinase-production	2	1977054	Leeuwenhoekiella sp.
GCA_001303025.1	12	['HfsD|Q9A5L5', 'OmpU|P0C6Q6', 'HfsF|Q9A5M1', 'HfsH|Q9A5L9', 'HfsG|Q9A5M0', 'sdrC|A0A6A8FED6', 'yfiB|Q9I4L6', 'sipW|P54506', 'ChiA|P32823', 'HfaB|P27343', 'HfsA|Q9A5L6', 'SRFAD|Q08788']	4	hfacces_chia_ompu_sdrc	adhesion_chitinase-production	2	1703398	Deltaproteobacteria bacterium SG8_13
GCA_002721535.1	16	['HfsD|Q9A5L5', 'OmpU|P0C6Q6', 'HfsF|Q9A5M1', 'HfsE|Q9A5M2', 'HfsG|Q9A5M0', 'tpbB|A0A0H2Z7X0', 'sdrC|A0A6A8FED6', 'yfiB|Q9I4L6', 'ompW|A0A0F4PBB9', 'sipW|P54506', 'RbmC|A0A2S1ZSI6', 'ChiA|P32823', 'HfsC|Q9A5L8', 'HfsA|Q9A5L6', 'Bap1|Q9KQW0', 'SRFAD|Q08788']	5	chia_ompu_sdrc_bap1_rbmc	chitinase-production_adhesion	2	1899355	Oceanospirillaceae bacterium
GCA_000161755.1	16	['SRFAA|P27206', 'SRFAB|Q04747', 'HfsD|Q9A5L5', 'OmpU|P0C6Q6', 'HfsF|Q9A5M1', 'HfsG|Q9A5M0', 'HfsH|Q9A5L9', 'SRFAC|Q08787', 'yfiB|Q9I4L6', 'ompW|A0A0F4PBB9', 'sipW|P54506', 'RbmC|A0A2S1ZSI6', 'HfsC|Q9A5L8', 'HfsA|Q9A5L6', 'Bap1|Q9KQW0', 'SRFAD|Q08788']	4	srf_ompu_bap1_rbmc	drag-reducing_adhesion	2	501479	Citreicella sp. SE45
GCA_002729835.1	12	['SRFAA|P27206', 'SRFAB|Q04747', 'HfsF|Q9A5M1', 'HfsE|Q9A5M2', 'HfsG|Q9A5M0', 'tpbB|A0A0H2Z7X0', 'ompA|A0A3B6XXR4', 'SRFAC|Q08787', 'sipW|P54506', 'ChiA|P32823', 'HfsC|Q9A5L8', 'SRFAD|Q08788']	2	srf_chia	drag-reducing_chitinase-production	2	2024885	Synechococcus sp. NP17
GCA_006439335.1	15	['HfsD|Q9A5L5', 'OmpU|P0C6Q6', 'HfsF|Q9A5M1', 'HfsE|Q9A5M2', 'HfsH|Q9A5L9', 'HfsG|Q9A5M0', 'tpbB|A0A0H2Z7X0', 'sdrC|A0A6A8FED6', 'yfiB|Q9I4L6', 'ompW|A0A0F4PBB9', 'sipW|P54506', 'ChiA|P32823', 'HfsC|Q9A5L8', 'HfsA|Q9A5L6', 'SRFAD|Q08788']	4	hfs_chia_ompu_sdrc	adhesion_chitinase-production	2	2491017	Litorilituus lipolyticus
GCA_000183745.1	13	['HfsD|Q9A5L5', 'HfsF|Q9A5M1', 'HfsE|Q9A5M2', 'HfsH|Q9A5L9', 'HfsG|Q9A5M0', 'sdrC|A0A6A8FED6', 'sipW|P54506', 'RbmC|A0A2S1ZSI6', 'ChiA|P32823', 'HfsC|Q9A5L8', 'HfsA|Q9A5L6', 'Bap1|Q9KQW0', 'SRFAD|Q08788']	5	hfs_chia_sdrc_bap1_rbmc	adhesion_chitinase-production	2	670487	Oceanithermus profundus
GCA_000363985.1	19	['Foo1|A1X158', 'ompA|A0A3B6XXR4', 'HfaB|P27343', 'OmpU|P0C6Q6', 'tpbB|A0A0H2Z7X0', 'ompW|A0A0F4PBB9', 'pilF|A0A290TXQ9', 'HfsD|Q9A5L5', 'HfsG|Q9A5M0', 'HfsE|Q9A5M2', 'HfsH|Q9A5L9', 'yfiB|Q9I4L6', 'sipW|P54506', 'ChiA|P32823', 'HfsC|Q9A5L8', 'yfiR|Q9I4L4', 'HfsA|Q9A5L6', 'GbpA|C3LW75', 'SRFAD|Q08788']	7	hfacces_foo_chia_omp_yfi_ompu_gbpa	adhesion_chitinase-production	2	1307437	Pseudoalteromonas agarivorans
GCA_001304505.1	15	['HfsD|Q9A5L5', 'HfsF|Q9A5M1', 'HfsE|Q9A5M2', 'HfsH|Q9A5L9', 'HfsG|Q9A5M0', 'tpbB|A0A0H2Z7X0', 'sdrC|A0A6A8FED6', 'yfiB|Q9I4L6', 'ompW|A0A0F4PBB9', 'sipW|P54506', 'ChiA|P32823', 'HfsC|Q9A5L8', 'yfiR|Q9I4L4', 'HfsA|Q9A5L6', 'SRFAD|Q08788']	4	hfs_chia_yfi_sdrc	adhesion_chitinase-production	2	1703353	Bacteroides sp. SM23_62_1
GCA_000224085.1	15	['HfsD|Q9A5L5', 'Foo1|A1X158', 'HfsF|Q9A5M1', 'HfsE|Q9A5M2', 'HfsH|Q9A5L9', 'HfsG|Q9A5M0', 'OmpU|P0C6Q6', 'tpbB|A0A0H2Z7X0', 'sdrC|A0A6A8FED6', 'ompA|A0A3B6XXR4', 'yfiB|Q9I4L6', 'sipW|P54506', 'ChiA|P32823', 'HfsC|Q9A5L8', 'HfsA|Q9A5L6']	5	hfs_foo_chia_ompu_sdrc	adhesion_chitinase-production	2	886377	Muricauda ruestringensis
GCA_002686085.1	14	['HfsD|Q9A5L5', 'OmpU|P0C6Q6', 'HfsF|Q9A5M1', 'HfsE|Q9A5M2', 'HfsH|Q9A5L9', 'HfsG|Q9A5M0', 'tpbB|A0A0H2Z7X0', 'sdrC|A0A6A8FED6', 'yfiB|Q9I4L6', 'sipW|P54506', 'ChiA|P32823', 'HfsC|Q9A5L8', 'HfsA|Q9A5L6', 'SRFAD|Q08788']	4	hfs_chia_ompu_sdrc	adhesion_chitinase-production	2	2024856	Roseibacillus sp.
GCA_001632005.1	10	['HfsF|Q9A5M1', 'HfsE|Q9A5M2', 'HfsG|Q9A5M0', 'tpbB|A0A0H2Z7X0', 'yfiB|Q9I4L6', 'sipW|P54506', 'ChiA|P32823', 'HfsC|Q9A5L8', 'HfaB|P27343', 'SRFAD|Q08788']	2	hfacces_chia	adhesion_chitinase-production	2	1801621	Prochlorococcus marinus
GCA_002694095.1	9	['HfsD|Q9A5L5', 'Foo1|A1X158', 'HfsF|Q9A5M1', 'HfsG|Q9A5M0', 'tpbB|A0A0H2Z7X0', 'pilF|A0A290TXQ9', 'sipW|P54506', 'ChiA|P32823', 'SRFAD|Q08788']	2	foo_chia	adhesion_chitinase-production	2	2026762	Micrococcales bacterium
GCA_002699125.1	18	['SRFAA|P27206', 'SRFAB|Q04747', 'HfsD|Q9A5L5', 'Foo1|A1X158', 'HfsF|Q9A5M1', 'HfsE|Q9A5M2', 'HfsG|Q9A5M0', 'HfsH|Q9A5L9', 'sdrC|A0A6A8FED6', 'ompA|A0A3B6XXR4', 'SRFAC|Q08787', 'yfiB|Q9I4L6', 'sipW|P54506', 'RbmC|A0A2S1ZSI6', 'HfsC|Q9A5L8', 'HfsA|Q9A5L6', 'Bap1|Q9KQW0', 'SRFAD|Q08788']	6	srf_hfs_foo_sdrc_bap1_rbmc	drag-reducing_adhesion	2	2024896	Anaerolineaceae bacterium
GCA_001683415.1	21	['SRFAB|Q04747', 'ompA|A0A3B6XXR4', 'HfaB|P27343', 'SRFAA|P27206', 'OmpU|P0C6Q6', 'tpbB|A0A0H2Z7X0', 'RbmC|A0A2S1ZSI6', 'Bap1|Q9KQW0', 'HfsD|Q9A5L5', 'HfsF|Q9A5M1', 'HfsE|Q9A5M2', 'HfsG|Q9A5M0', 'HfsH|Q9A5L9', 'yfiB|Q9I4L6', 'sipW|P54506', 'ChiA|P32823', 'HfsC|Q9A5L8', 'HfsA|Q9A5L6', 'sdrC|A0A6A8FED6', 'GbpA|C3LW75', 'SRFAD|Q08788']	8	hfs_hfacces_chia_ompu_sdrc_bap1_rbmc_gbpa	adhesion_chitinase-production	2	412614	Vibrio cholerae
GCA_013283425.1	14	['HfsD|Q9A5L5', 'HfsF|Q9A5M1', 'HfsH|Q9A5L9', 'HfsG|Q9A5M0', 'tpbB|A0A0H2Z7X0', 'yfiB|Q9I4L6', 'sipW|P54506', 'RbmC|A0A2S1ZSI6', 'ChiA|P32823', 'HfsC|Q9A5L8', 'HfaB|P27343', 'HfsA|Q9A5L6', 'Bap1|Q9KQW0', 'SRFAD|Q08788']	4	hfacces_chia_bap1_rbmc	adhesion_chitinase-production	2	2497736	Marinobacterium sp. xm-a-127
GCA_002722875.1	14	['SRFAA|P27206', 'SRFAB|Q04747', 'HfsD|Q9A5L5', 'HfsF|Q9A5M1', 'HfsE|Q9A5M2', 'HfsG|Q9A5M0', 'HfsH|Q9A5L9', 'sdrC|A0A6A8FED6', 'SRFAC|Q08787', 'yfiB|Q9I4L6', 'sipW|P54506', 'ChiA|P32823', 'HfsC|Q9A5L8', 'HfsA|Q9A5L6']	3	hfs_chia_sdrc	adhesion_chitinase-production	2	1978231	Acidobacteria bacterium
GCA_002687445.1	17	['HfsD|Q9A5L5', 'OmpU|P0C6Q6', 'HfsF|Q9A5M1', 'HfsE|Q9A5M2', 'HfsH|Q9A5L9', 'HfsG|Q9A5M0', 'tpbB|A0A0H2Z7X0', 'yfiB|Q9I4L6', 'ompW|A0A0F4PBB9', 'sipW|P54506', 'RbmC|A0A2S1ZSI6', 'ChiA|P32823', 'HfsC|Q9A5L8', 'HfaB|P27343', 'HfsA|Q9A5L6', 'Bap1|Q9KQW0', 'SRFAD|Q08788']	6	hfs_hfacces_chia_ompu_bap1_rbmc	adhesion_chitinase-production	2	1890675	Herbaspirillum sp.
GCA_011602365.1	18	['HfsD|Q9A5L5', 'OmpU|P0C6Q6', 'HfsG|Q9A5M0', 'HfsE|Q9A5M2', 'HfsH|Q9A5L9', 'tpbB|A0A0H2Z7X0', 'sdrC|A0A6A8FED6', 'ompA|A0A3B6XXR4', 'yfiB|Q9I4L6', 'ompW|A0A0F4PBB9', 'sipW|P54506', 'RbmC|A0A2S1ZSI6', 'ChiA|P32823', 'HfsC|Q9A5L8', 'yfiR|Q9I4L4', 'HfsA|Q9A5L6', 'Bap1|Q9KQW0', 'SRFAD|Q08788']	6	chia_yfi_ompu_sdrc_bap1_rbmc	chitinase-production_adhesion	2	1470433	Aestuariicella hydrocarbonica
GCA_002877645.1	17	['HfsD|Q9A5L5', 'OmpU|P0C6Q6', 'HfsG|Q9A5M0', 'HfsE|Q9A5M2', 'HfsH|Q9A5L9', 'tpbB|A0A0H2Z7X0', 'ompA|A0A3B6XXR4', 'yfiB|Q9I4L6', 'ompW|A0A0F4PBB9', 'GbpA|C3LW75', 'sipW|P54506', 'ChiA|P32823', 'HfsC|Q9A5L8', 'yfiR|Q9I4L4', 'HfaB|P27343', 'HfsA|Q9A5L6', 'SRFAD|Q08788']	5	hfacces_chia_yfi_ompu_gbpa	adhesion_chitinase-production	2	136468	Vibrio lentus
GCA_002705055.1	18	['SRFAA|P27206', 'SRFAB|Q04747', 'HfsD|Q9A5L5', 'OmpU|P0C6Q6', 'HfsF|Q9A5M1', 'HfsE|Q9A5M2', 'HfsG|Q9A5M0', 'HfsH|Q9A5L9', 'sdrC|A0A6A8FED6', 'yfiB|Q9I4L6', 'sipW|P54506', 'RbmC|A0A2S1ZSI6', 'ChiA|P32823', 'HfsC|Q9A5L8', 'HfaB|P27343', 'HfsA|Q9A5L6', 'Bap1|Q9KQW0', 'SRFAD|Q08788']	7	hfs_hfacces_chia_ompu_sdrc_bap1_rbmc	adhesion_chitinase-production	2	2026780	Planctomycetota bacterium
GCA_013004065.1	15	['HfsD|Q9A5L5', 'OmpU|P0C6Q6', 'HfsF|Q9A5M1', 'HfsG|Q9A5M0', 'sdrC|A0A6A8FED6', 'tpbB|A0A0H2Z7X0', 'yfiB|Q9I4L6', 'sipW|P54506', 'RbmC|A0A2S1ZSI6', 'ChiA|P32823', 'HfsC|Q9A5L8', 'HfaB|P27343', 'HfsA|Q9A5L6', 'Bap1|Q9KQW0', 'SRFAD|Q08788']	6	hfacces_chia_ompu_sdrc_bap1_rbmc	adhesion_chitinase-production	2	2732163	Limnobacter sp. SAORIC-580
GCA_002729115.1	12	['HfsG|Q9A5M0', 'HfsH|Q9A5L9', 'tpbB|A0A0H2Z7X0', 'yfiB|Q9I4L6', 'RbmC|A0A2S1ZSI6', 'ChiA|P32823', 'HfsC|Q9A5L8', 'yfiR|Q9I4L4', 'HfaB|P27343', 'HfsA|Q9A5L6', 'Bap1|Q9KQW0', 'SRFAD|Q08788']	5	hfacces_chia_yfi_bap1_rbmc	adhesion_chitinase-production	2	2026728	Crocinitomicaceae bacterium
GCA_001304045.1	16	['HfsD|Q9A5L5', 'Foo1|A1X158', 'HfsF|Q9A5M1', 'HfsE|Q9A5M2', 'HfsH|Q9A5L9', 'HfsG|Q9A5M0', 'tpbB|A0A0H2Z7X0', 'sdrC|A0A6A8FED6', 'yfiB|Q9I4L6', 'ompW|A0A0F4PBB9', 'ChiA|P32823', 'HfsC|Q9A5L8', 'yfiR|Q9I4L4', 'HfaB|P27343', 'HfsA|Q9A5L6', 'SRFAD|Q08788']	6	hfs_hfacces_foo_chia_yfi_sdrc	adhesion_chitinase-production	2	1703351	Bacteroides sp. SM1_62
GCA_000950005.1	17	['HfsD|Q9A5L5', 'OmpU|P0C6Q6', 'HfsF|Q9A5M1', 'HfsE|Q9A5M2', 'HfsG|Q9A5M0', 'tpbB|A0A0H2Z7X0', 'sdrC|A0A6A8FED6', 'ompA|A0A3B6XXR4', 'yfiB|Q9I4L6', 'GbpA|C3LW75', 'sipW|P54506', 'ChiA|P32823', 'HfsC|Q9A5L8', 'yfiR|Q9I4L4', 'HfaB|P27343', 'HfsA|Q9A5L6', 'SRFAD|Q08788']	6	hfacces_chia_yfi_ompu_sdrc_gbpa	adhesion_chitinase-production	2	661	Photobacterium angustum
GCA_002728215.1	11	['SRFAA|P27206', 'SRFAB|Q04747', 'HfsG|Q9A5M0', 'HfsE|Q9A5M2', 'sdrC|A0A6A8FED6', 'sipW|P54506', 'RbmC|A0A2S1ZSI6', 'ChiA|P32823', 'HfsC|Q9A5L8', 'Bap1|Q9KQW0', 'SRFAD|Q08788']	4	chia_sdrc_bap1_rbmc	chitinase-production_adhesion	2	1869227	bacterium
GCA_900129985.1	12	['SRFAA|P27206', 'SRFAB|Q04747', 'HfsD|Q9A5L5', 'HfsF|Q9A5M1', 'HfsG|Q9A5M0', 'HfsH|Q9A5L9', 'sdrC|A0A6A8FED6', 'sipW|P54506', 'ChiA|P32823', 'HfsC|Q9A5L8', 'HfsA|Q9A5L6', 'SRFAD|Q08788']	2	chia_sdrc	chitinase-production_adhesion	2	1123380	Thermosipho atlanticus
GCA_001267955.1	16	['HfsD|Q9A5L5', 'HfsF|Q9A5M1', 'HfsE|Q9A5M2', 'HfsH|Q9A5L9', 'HfsG|Q9A5M0', 'tpbB|A0A0H2Z7X0', 'sdrC|A0A6A8FED6', 'ompA|A0A3B6XXR4', 'yfiB|Q9I4L6', 'sipW|P54506', 'RbmC|A0A2S1ZSI6', 'ChiA|P32823', 'HfsC|Q9A5L8', 'HfsA|Q9A5L6', 'Bap1|Q9KQW0', 'SRFAD|Q08788']	5	hfs_chia_sdrc_bap1_rbmc	adhesion_chitinase-production	2	1566026	Roseivirga seohaensis
GCA_002009255.1	19	['SRFAB|Q04747', 'HfaB|P27343', 'SRFAA|P27206', 'OmpU|P0C6Q6', 'tpbB|A0A0H2Z7X0', 'ompW|A0A0F4PBB9', 'RbmC|A0A2S1ZSI6', 'Bap1|Q9KQW0', 'HfsD|Q9A5L5', 'HfsF|Q9A5M1', 'HfsE|Q9A5M2', 'HfsG|Q9A5M0', 'HfsH|Q9A5L9', 'SRFAC|Q08787', 'yfiB|Q9I4L6', 'sipW|P54506', 'HfsC|Q9A5L8', 'sdrC|A0A6A8FED6', 'SRFAD|Q08788']	6	srf_hfacces_ompu_sdrc_bap1_rbmc	drag-reducing_adhesion	2	1962264	Halomonas sp. 'Soap Lake #7'
GCA_002693775.1	11	['Foo1|A1X158', 'HfsF|Q9A5M1', 'HfsH|Q9A5L9', 'HfsG|Q9A5M0', 'yfiB|Q9I4L6', 'sipW|P54506', 'ChiA|P32823', 'HfsC|Q9A5L8', 'HfaB|P27343', 'HfsA|Q9A5L6', 'SRFAD|Q08788']	3	hfacces_foo_chia	adhesion_chitinase-production	2	2026728	Crocinitomicaceae bacterium
GCA_014164425.1	21	['Foo1|A1X158', 'ompA|A0A3B6XXR4', 'HfaB|P27343', 'OmpU|P0C6Q6', 'ompW|A0A0F4PBB9', 'RbmC|A0A2S1ZSI6', 'Bap1|Q9KQW0', 'pilF|A0A290TXQ9', 'HfsD|Q9A5L5', 'HfsF|Q9A5M1', 'HfsH|Q9A5L9', 'HfsG|Q9A5M0', 'yfiB|Q9I4L6', 'sipW|P54506', 'ChiA|P32823', 'HfsC|Q9A5L8', 'yfiR|Q9I4L4', 'HfsA|Q9A5L6', 'sdrC|A0A6A8FED6', 'GbpA|C3LW75', 'SRFAD|Q08788']	9	hfacces_foo_chia_omp_ompu_sdrc_bap1_rbmc_gbpa	adhesion_chitinase-production	2	2760972	Pseudoalteromonas sp. SG41-8
GCA_000463345.3	20	['SRFAB|Q04747', 'ompA|A0A3B6XXR4', 'HfaB|P27343', 'SRFAA|P27206', 'OmpU|P0C6Q6', 'tpbB|A0A0H2Z7X0', 'ompW|A0A0F4PBB9', 'RbmC|A0A2S1ZSI6', 'Bap1|Q9KQW0', 'HfsD|Q9A5L5', 'HfsF|Q9A5M1', 'HfsE|Q9A5M2', 'HfsG|Q9A5M0', 'HfsH|Q9A5L9', 'SRFAC|Q08787', 'yfiB|Q9I4L6', 'sipW|P54506', 'HfsC|Q9A5L8', 'HfsA|Q9A5L6', 'SRFAD|Q08788']	6	srf_hfs_hfacces_ompu_bap1_rbmc	drag-reducing_adhesion	2	104623	Serratia sp. ATCC 39006
GCA_002149065.1	17	['HfsD|Q9A5L5', 'OmpU|P0C6Q6', 'HfsF|Q9A5M1', 'HfsE|Q9A5M2', 'HfsH|Q9A5L9', 'HfsG|Q9A5M0', 'tpbB|A0A0H2Z7X0', 'ompA|A0A3B6XXR4', 'yfiB|Q9I4L6', 'ompW|A0A0F4PBB9', 'GbpA|C3LW75', 'sipW|P54506', 'ChiA|P32823', 'HfsC|Q9A5L8', 'HfaB|P27343', 'HfsA|Q9A5L6', 'SRFAD|Q08788']	5	hfs_hfacces_chia_ompu_gbpa	adhesion_chitinase-production	2	663	Vibrio alginolyticus
GCA_014077505.1	18	['HfsD|Q9A5L5', 'Foo1|A1X158', 'HfsF|Q9A5M1', 'HfsE|Q9A5M2', 'HfsH|Q9A5L9', 'HfsG|Q9A5M0', 'OmpU|P0C6Q6', 'tpbB|A0A0H2Z7X0', 'ompA|A0A3B6XXR4', 'yfiB|Q9I4L6', 'ompW|A0A0F4PBB9', 'pilF|A0A290TXQ9', 'sipW|P54506', 'ChiA|P32823', 'HfsC|Q9A5L8', 'HfaB|P27343', 'HfsA|Q9A5L6', 'SRFAD|Q08788']	6	hfs_hfacces_foo_chia_omp_ompu	adhesion_chitinase-production	2	2759844	Colwellia sp. BRX10-3
GCA_005116665.1	19	['Foo1|A1X158', 'ompA|A0A3B6XXR4', 'HfaB|P27343', 'OmpU|P0C6Q6', 'ompW|A0A0F4PBB9', 'RbmC|A0A2S1ZSI6', 'Bap1|Q9KQW0', 'HfsD|Q9A5L5', 'HfsF|Q9A5M1', 'HfsE|Q9A5M2', 'HfsH|Q9A5L9', 'HfsG|Q9A5M0', 'yfiB|Q9I4L6', 'sipW|P54506', 'ChiA|P32823', 'HfsC|Q9A5L8', 'HfsA|Q9A5L6', 'sdrC|A0A6A8FED6', 'SRFAD|Q08788']	8	hfs_hfacces_foo_chia_ompu_sdrc_bap1_rbmc	adhesion_chitinase-production	2	44011	unclassified
GCA_002729375.1	16	['HfsD|Q9A5L5', 'Foo1|A1X158', 'HfsF|Q9A5M1', 'HfsE|Q9A5M2', 'HfsH|Q9A5L9', 'HfsG|Q9A5M0', 'OmpU|P0C6Q6', 'yfiB|Q9I4L6', 'ompW|A0A0F4PBB9', 'pilF|A0A290TXQ9', 'sipW|P54506', 'ChiA|P32823', 'HfsC|Q9A5L8', 'HfaB|P27343', 'HfsA|Q9A5L6', 'SRFAD|Q08788']	5	hfs_hfacces_foo_chia_ompu	adhesion_chitinase-production	2	232	Alteromonas sp.
GCA_001730205.1	22	['SRFAB|Q04747', 'ompA|A0A3B6XXR4', 'HfaB|P27343', 'SRFAA|P27206', 'OmpU|P0C6Q6', 'tpbB|A0A0H2Z7X0', 'ompW|A0A0F4PBB9', 'RbmC|A0A2S1ZSI6', 'Bap1|Q9KQW0', 'HfsD|Q9A5L5', 'HfsF|Q9A5M1', 'HfsE|Q9A5M2', 'HfsG|Q9A5M0', 'HfsH|Q9A5L9', 'yfiB|Q9I4L6', 'sipW|P54506', 'ChiA|P32823', 'HfsC|Q9A5L8', 'yfiR|Q9I4L4', 'HfsA|Q9A5L6', 'GbpA|C3LW75', 'SRFAD|Q08788']	8	hfs_hfacces_chia_yfi_ompu_bap1_rbmc_gbpa	adhesion_chitinase-production	2	648	Aeromonas caviae
GCA_003172915.1	12	['HfsD|Q9A5L5', 'OmpU|P0C6Q6', 'HfsG|Q9A5M0', 'HfsE|Q9A5M2', 'HfsH|Q9A5L9', 'sdrC|A0A6A8FED6', 'yfiB|Q9I4L6', 'sipW|P54506', 'ChiA|P32823', 'HfsC|Q9A5L8', 'HfsA|Q9A5L6', 'SRFAD|Q08788']	3	chia_ompu_sdrc	chitinase-production_adhesion	2	2072018	Meridianimarinicoccus roseus
GCA_014163565.1	20	['SRFAB|Q04747', 'Foo1|A1X158', 'HfaB|P27343', 'SRFAA|P27206', 'OmpU|P0C6Q6', 'tpbB|A0A0H2Z7X0', 'ompW|A0A0F4PBB9', 'HfsD|Q9A5L5', 'HfsG|Q9A5M0', 'HfsE|Q9A5M2', 'HfsH|Q9A5L9', 'yfiB|Q9I4L6', 'sipW|P54506', 'ChiA|P32823', 'HfsC|Q9A5L8', 'yfiR|Q9I4L4', 'HfsA|Q9A5L6', 'sdrC|A0A6A8FED6', 'GbpA|C3LW75', 'SRFAD|Q08788']	7	hfacces_foo_chia_yfi_ompu_sdrc_gbpa	adhesion_chitinase-production	2	2760928	Pseudoalteromonas sp. SR45-5
GCA_001691105.1	15	['HfsD|Q9A5L5', 'OmpU|P0C6Q6', 'HfsG|Q9A5M0', 'HfsE|Q9A5M2', 'ompA|A0A3B6XXR4', 'tpbB|A0A0H2Z7X0', 'yfiB|Q9I4L6', 'GbpA|C3LW75', 'sipW|P54506', 'ChiA|P32823', 'HfsC|Q9A5L8', 'yfiR|Q9I4L4', 'HfaB|P27343', 'HfsA|Q9A5L6', 'SRFAD|Q08788']	5	hfacces_chia_yfi_ompu_gbpa	adhesion_chitinase-production	2	668	Aliivibrio fischeri
GCA_014779715.1	24	['SRFAB|Q04747', 'CHPC|Q9AD93', 'ompA|A0A3B6XXR4', 'CHPE|Q9X9Z2', 'SRFAA|P27206', 'CHPG|Q9KYH3', 'CHPA|Q8CJY7', 'HfsD|Q9A5L5', 'HfsF|Q9A5M1', 'HfsE|Q9A5M2', 'HfsG|Q9A5M0', 'HfsH|Q9A5L9', 'SRFAC|Q08787', 'yfiB|Q9I4L6', 'CHPF|Q9KYG7', 'CHPH|Q9AD92', 'sipW|P54506', 'HfsC|Q9A5L8', 'HfsA|Q9A5L6', 'CHPB|Q9X7U2', 'sdrC|A0A6A8FED6', 'CHPD|Q9L1J9', 'GbpA|C3LW75', 'SRFAD|Q08788']	5	srf_hfs_chp_sdrc_gbpa	drag-reducing_adhesion	2	1214925	Streptomyces chumphonensis
GCA_002224445.1	17	['SRFAA|P27206', 'SRFAB|Q04747', 'HfsD|Q9A5L5', 'HfsF|Q9A5M1', 'HfsE|Q9A5M2', 'HfsG|Q9A5M0', 'HfsH|Q9A5L9', 'tpbB|A0A0H2Z7X0', 'ompA|A0A3B6XXR4', 'SRFAC|Q08787', 'yfiB|Q9I4L6', 'sipW|P54506', 'RbmC|A0A2S1ZSI6', 'HfsC|Q9A5L8', 'HfsA|Q9A5L6', 'Bap1|Q9KQW0', 'SRFAD|Q08788']	4	srf_hfs_bap1_rbmc	drag-reducing_adhesion	2	2020130	Arthrobacter sp. 7749
GCA_002720825.1	13	['SRFAA|P27206', 'SRFAB|Q04747', 'HfsD|Q9A5L5', 'Foo1|A1X158', 'HfsF|Q9A5M1', 'HfsE|Q9A5M2', 'HfsG|Q9A5M0', 'HfsH|Q9A5L9', 'yfiB|Q9I4L6', 'sipW|P54506', 'ChiA|P32823', 'HfsC|Q9A5L8', 'SRFAD|Q08788']	2	foo_chia	adhesion_chitinase-production	2	2026801	Verrucomicrobiales bacterium
GCA_002693365.1	10	['HfsD|Q9A5L5', 'HfsF|Q9A5M1', 'HfsE|Q9A5M2', 'HfsH|Q9A5L9', 'HfsG|Q9A5M0', 'sdrC|A0A6A8FED6', 'yfiB|Q9I4L6', 'sipW|P54506', 'ChiA|P32823', 'HfsA|Q9A5L6']	2	chia_sdrc	chitinase-production_adhesion	2	2026760	Candidatus Marinimicrobia bacterium
GCA_900112295.1	12	['HfsD|Q9A5L5', 'Foo1|A1X158', 'HfsG|Q9A5M0', 'sdrC|A0A6A8FED6', 'ompA|A0A3B6XXR4', 'tpbB|A0A0H2Z7X0', 'yfiB|Q9I4L6', 'ompW|A0A0F4PBB9', 'sipW|P54506', 'ChiA|P32823', 'HfsC|Q9A5L8', 'HfsA|Q9A5L6']	3	foo_chia_sdrc	adhesion_chitinase-production	2	1055723	Muricauda antarctica
GCA_002720035.1	15	['HfsD|Q9A5L5', 'Foo1|A1X158', 'HfsF|Q9A5M1', 'HfsE|Q9A5M2', 'HfsH|Q9A5L9', 'HfsG|Q9A5M0', 'OmpU|P0C6Q6', 'tpbB|A0A0H2Z7X0', 'sdrC|A0A6A8FED6', 'yfiB|Q9I4L6', 'sipW|P54506', 'ChiA|P32823', 'HfsC|Q9A5L8', 'HfsA|Q9A5L6', 'SRFAD|Q08788']	5	hfs_foo_chia_ompu_sdrc	adhesion_chitinase-production	2	2026800	Verrucomicrobiaceae bacterium
GCA_002702655.1	13	['HfsD|Q9A5L5', 'Foo1|A1X158', 'HfsF|Q9A5M1', 'HfsE|Q9A5M2', 'HfsH|Q9A5L9', 'HfsG|Q9A5M0', 'sdrC|A0A6A8FED6', 'yfiB|Q9I4L6', 'sipW|P54506', 'ChiA|P32823', 'HfsC|Q9A5L8', 'HfsA|Q9A5L6', 'SRFAD|Q08788']	4	hfs_foo_chia_sdrc	adhesion_chitinase-production	2	2026779	Planctomycetaceae bacterium
GCA_009363335.1	15	['SRFAA|P27206', 'SRFAB|Q04747', 'HfsD|Q9A5L5', 'Foo1|A1X158', 'HfsF|Q9A5M1', 'HfsE|Q9A5M2', 'HfsG|Q9A5M0', 'HfsH|Q9A5L9', 'tpbB|A0A0H2Z7X0', 'SRFAC|Q08787', 'yfiB|Q9I4L6', 'sipW|P54506', 'HfsC|Q9A5L8', 'HfsA|Q9A5L6', 'SRFAD|Q08788']	3	srf_hfs_foo	drag-reducing_adhesion	2	2587866	Labrenzia sp. THAF191a
GCA_002720475.1	12	['HfsD|Q9A5L5', 'OmpU|P0C6Q6', 'HfsG|Q9A5M0', 'yfiB|Q9I4L6', 'ompW|A0A0F4PBB9', 'sipW|P54506', 'RbmC|A0A2S1ZSI6', 'ChiA|P32823', 'HfsC|Q9A5L8', 'HfsA|Q9A5L6', 'Bap1|Q9KQW0', 'SRFAD|Q08788']	4	chia_ompu_bap1_rbmc	chitinase-production_adhesion	2	1486281	Roseovarius sp.
GCA_002684605.1	14	['HfsD|Q9A5L5', 'OmpU|P0C6Q6', 'HfsF|Q9A5M1', 'HfsE|Q9A5M2', 'HfsH|Q9A5L9', 'HfsG|Q9A5M0', 'tpbB|A0A0H2Z7X0', 'ompA|A0A3B6XXR4', 'yfiB|Q9I4L6', 'sipW|P54506', 'ChiA|P32823', 'HfsC|Q9A5L8', 'HfsA|Q9A5L6', 'SRFAD|Q08788']	3	hfs_chia_ompu	adhesion_chitinase-production	2	2026776	Pelagibacterales bacterium
GCA_012933595.1	11	['HfsF|Q9A5M1', 'HfsE|Q9A5M2', 'HfsG|Q9A5M0', 'tpbB|A0A0H2Z7X0', 'ompA|A0A3B6XXR4', 'yfiB|Q9I4L6', 'sipW|P54506', 'ChiA|P32823', 'HfsC|Q9A5L8', 'HfaB|P27343', 'SRFAD|Q08788']	2	hfacces_chia	adhesion_chitinase-production	2	1218	unclassified
GCA_002706305.1	11	['HfsD|Q9A5L5', 'HfsF|Q9A5M1', 'HfsE|Q9A5M2', 'HfsH|Q9A5L9', 'HfsG|Q9A5M0', 'sdrC|A0A6A8FED6', 'yfiB|Q9I4L6', 'sipW|P54506', 'ChiA|P32823', 'HfsC|Q9A5L8', 'HfsA|Q9A5L6']	3	hfs_chia_sdrc	adhesion_chitinase-production	2	2026801	Verrucomicrobiales bacterium
GCA_002728805.1	14	['HfsD|Q9A5L5', 'Foo1|A1X158', 'HfsF|Q9A5M1', 'HfsE|Q9A5M2', 'HfsH|Q9A5L9', 'HfsG|Q9A5M0', 'OmpU|P0C6Q6', 'ompA|A0A3B6XXR4', 'yfiB|Q9I4L6', 'ompW|A0A0F4PBB9', 'sipW|P54506', 'ChiA|P32823', 'HfaB|P27343', 'SRFAD|Q08788']	4	hfacces_foo_chia_ompu	adhesion_chitinase-production	2	232	Alteromonas sp.
GCA_002709405.1	12	['HfsD|Q9A5L5', 'OmpU|P0C6Q6', 'HfsF|Q9A5M1', 'HfsH|Q9A5L9', 'HfsG|Q9A5M0', 'yfiB|Q9I4L6', 'ompW|A0A0F4PBB9', 'sipW|P54506', 'ChiA|P32823', 'HfsC|Q9A5L8', 'HfsA|Q9A5L6', 'SRFAD|Q08788']	2	chia_ompu	chitinase-production_adhesion	2	1904441	Rhodobacteraceae bacterium
GCA_002686885.1	15	['SRFAA|P27206', 'SRFAB|Q04747', 'HfsD|Q9A5L5', 'HfsF|Q9A5M1', 'HfsE|Q9A5M2', 'HfsG|Q9A5M0', 'HfsH|Q9A5L9', 'tpbB|A0A0H2Z7X0', 'sdrC|A0A6A8FED6', 'yfiB|Q9I4L6', 'sipW|P54506', 'ChiA|P32823', 'HfsC|Q9A5L8', 'HfsA|Q9A5L6', 'SRFAD|Q08788']	3	hfs_chia_sdrc	adhesion_chitinase-production	2	2024890	Pedosphaera sp.
GCA_002684175.1	11	['HfsF|Q9A5M1', 'HfsG|Q9A5M0', 'sdrC|A0A6A8FED6', 'tpbB|A0A0H2Z7X0', 'SRFAC|Q08787', 'sipW|P54506', 'RbmC|A0A2S1ZSI6', 'ChiA|P32823', 'HfsC|Q9A5L8', 'HfaB|P27343', 'Bap1|Q9KQW0']	5	hfacces_chia_sdrc_bap1_rbmc	adhesion_chitinase-production	2	2024880	Synechococcus sp. CPC35
GCA_002691825.1	11	['HfsD|Q9A5L5', 'Foo1|A1X158', 'HfsH|Q9A5L9', 'OmpU|P0C6Q6', 'ompA|A0A3B6XXR4', 'yfiB|Q9I4L6', 'sipW|P54506', 'RbmC|A0A2S1ZSI6', 'ChiA|P32823', 'Bap1|Q9KQW0', 'SRFAD|Q08788']	5	foo_chia_ompu_bap1_rbmc	adhesion_chitinase-production	2	2026782	Porticoccaceae bacterium
GCA_002721625.1	17	['SRFAA|P27206', 'SRFAB|Q04747', 'Foo1|A1X158', 'OmpU|P0C6Q6', 'HfsF|Q9A5M1', 'HfsG|Q9A5M0', 'HfsH|Q9A5L9', 'tpbB|A0A0H2Z7X0', 'sdrC|A0A6A8FED6', 'ompA|A0A3B6XXR4', 'yfiB|Q9I4L6', 'ompW|A0A0F4PBB9', 'sipW|P54506', 'ChiA|P32823', 'yfiR|Q9I4L4', 'HfaB|P27343', 'SRFAD|Q08788']	6	hfacces_foo_chia_yfi_ompu_sdrc	adhesion_chitinase-production	2	1869214	Rheinheimera sp.
GCA_002712175.1	10	['bslA|P71014', 'HfsD|Q9A5L5', 'HfsF|Q9A5M1', 'bslB|P39632', 'HfsG|Q9A5M0', 'yfiB|Q9I4L6', 'ompW|A0A0F4PBB9', 'RbmC|A0A2S1ZSI6', 'Bap1|Q9KQW0', 'SRFAD|Q08788']	3	bsl_bap1_rbmc	drag-reducing_adhesion	2	1486281	Roseovarius sp.
GCA_001303665.1	13	['SRFAA|P27206', 'SRFAB|Q04747', 'HfsD|Q9A5L5', 'HfsF|Q9A5M1', 'HfsE|Q9A5M2', 'HfsG|Q9A5M0', 'HfsH|Q9A5L9', 'sdrC|A0A6A8FED6', 'yfiB|Q9I4L6', 'ChiA|P32823', 'HfsC|Q9A5L8', 'HfaB|P27343', 'SRFAD|Q08788']	3	hfacces_chia_sdrc	adhesion_chitinase-production	2	1703412	Phycisphaerae bacterium SM23_33
GCA_002873395.1	16	['HfsD|Q9A5L5', 'OmpU|P0C6Q6', 'HfsF|Q9A5M1', 'HfsH|Q9A5L9', 'HfsG|Q9A5M0', 'tpbB|A0A0H2Z7X0', 'sdrC|A0A6A8FED6', 'ompA|A0A3B6XXR4', 'yfiB|Q9I4L6', 'GbpA|C3LW75', 'sipW|P54506', 'ChiA|P32823', 'HfsC|Q9A5L8', 'HfaB|P27343', 'HfsA|Q9A5L6', 'SRFAD|Q08788']	5	hfacces_chia_ompu_sdrc_gbpa	adhesion_chitinase-production	2	1880855	Vibrio sp. 10N.286.49.B3
GCA_015207755.1	15	['SRFAA|P27206', 'SRFAB|Q04747', 'HfsD|Q9A5L5', 'OmpU|P0C6Q6', 'HfsF|Q9A5M1', 'HfsE|Q9A5M2', 'HfsG|Q9A5M0', 'HfsH|Q9A5L9', 'sdrC|A0A6A8FED6', 'SRFAC|Q08787', 'yfiB|Q9I4L6', 'sipW|P54506', 'HfsC|Q9A5L8', 'HfsA|Q9A5L6', 'SRFAD|Q08788']	4	srf_hfs_ompu_sdrc	drag-reducing_adhesion	2	2777965	Nodularia sp. LEGE 06071
GCA_002698425.1	16	['SRFAA|P27206', 'SRFAB|Q04747', 'HfsD|Q9A5L5', 'HfsG|Q9A5M0', 'HfsE|Q9A5M2', 'HfsH|Q9A5L9', 'tpbB|A0A0H2Z7X0', 'SRFAC|Q08787', 'yfiB|Q9I4L6', 'ompW|A0A0F4PBB9', 'sipW|P54506', 'RbmC|A0A2S1ZSI6', 'HfsC|Q9A5L8', 'HfsA|Q9A5L6', 'Bap1|Q9KQW0', 'SRFAD|Q08788']	3	srf_bap1_rbmc	drag-reducing_adhesion	2	1872419	Ahrensia sp.
GCA_011492965.1	12	['SRFAA|P27206', 'SRFAB|Q04747', 'HfsF|Q9A5M1', 'HfsG|Q9A5M0', 'HfsH|Q9A5L9', 'sipW|P54506', 'RbmC|A0A2S1ZSI6', 'ChiA|P32823', 'HfsC|Q9A5L8', 'HfsA|Q9A5L6', 'Bap1|Q9KQW0', 'SRFAD|Q08788']	3	chia_bap1_rbmc	chitinase-production_adhesion	2	2653852	Rubrobacter marinus
GCA_002691605.1	16	['HfsD|Q9A5L5', 'HfsG|Q9A5M0', 'HfsE|Q9A5M2', 'HfsH|Q9A5L9', 'tpbB|A0A0H2Z7X0', 'sdrC|A0A6A8FED6', 'yfiB|Q9I4L6', 'sipW|P54506', 'RbmC|A0A2S1ZSI6', 'ChiA|P32823', 'HfsC|Q9A5L8', 'yfiR|Q9I4L4', 'HfaB|P27343', 'HfsA|Q9A5L6', 'Bap1|Q9KQW0', 'SRFAD|Q08788']	6	hfacces_chia_yfi_sdrc_bap1_rbmc	adhesion_chitinase-production	2	2026728	Crocinitomicaceae bacterium
GCA_001028085.1	12	['HfsD|Q9A5L5', 'Foo1|A1X158', 'HfsF|Q9A5M1', 'HfsH|Q9A5L9', 'HfsG|Q9A5M0', 'sdrC|A0A6A8FED6', 'ompA|A0A3B6XXR4', 'yfiB|Q9I4L6', 'sipW|P54506', 'ChiA|P32823', 'HfsA|Q9A5L6', 'SRFAD|Q08788']	3	foo_chia_sdrc	adhesion_chitinase-production	2	1629723	Geobacillus sp. 12AMOR1
GCA_000341985.1	20	['SRFAB|Q04747', 'ompA|A0A3B6XXR4', 'HfaB|P27343', 'SRFAA|P27206', 'OmpU|P0C6Q6', 'ompW|A0A0F4PBB9', 'RbmC|A0A2S1ZSI6', 'Bap1|Q9KQW0', 'HfsD|Q9A5L5', 'HfsF|Q9A5M1', 'HfsE|Q9A5M2', 'HfsG|Q9A5M0', 'HfsH|Q9A5L9', 'SRFAC|Q08787', 'yfiB|Q9I4L6', 'sipW|P54506', 'HfsC|Q9A5L8', 'yfiR|Q9I4L4', 'HfsA|Q9A5L6', 'SRFAD|Q08788']	6	srf_hfs_hfacces_ompu_bap1_rbmc	drag-reducing_adhesion	2	1278070	Acinetobacter baumannii
GCA_002714865.1	15	['HfsD|Q9A5L5', 'OmpU|P0C6Q6', 'HfsF|Q9A5M1', 'HfsE|Q9A5M2', 'HfsH|Q9A5L9', 'HfsG|Q9A5M0', 'tpbB|A0A0H2Z7X0', 'sdrC|A0A6A8FED6', 'yfiB|Q9I4L6', 'ompW|A0A0F4PBB9', 'sipW|P54506', 'ChiA|P32823', 'HfsC|Q9A5L8', 'HfsA|Q9A5L6', 'SRFAD|Q08788']	4	hfs_chia_ompu_sdrc	adhesion_chitinase-production	2	1931211	Xanthomarina sp.
GCA_002709305.1	14	['HfsD|Q9A5L5', 'Foo1|A1X158', 'HfsF|Q9A5M1', 'HfsE|Q9A5M2', 'HfsH|Q9A5L9', 'HfsG|Q9A5M0', 'OmpU|P0C6Q6', 'ompA|A0A3B6XXR4', 'yfiB|Q9I4L6', 'sipW|P54506', 'ChiA|P32823', 'HfsC|Q9A5L8', 'HfsA|Q9A5L6', 'SRFAD|Q08788']	4	hfs_foo_chia_ompu	adhesion_chitinase-production	2	2026728	Crocinitomicaceae bacterium
GCA_900115165.1	14	['SRFAA|P27206', 'SRFAB|Q04747', 'HfsD|Q9A5L5', 'OmpU|P0C6Q6', 'HfsF|Q9A5M1', 'bslB|P39632', 'HfsG|Q9A5M0', 'HfsH|Q9A5L9', 'SRFAD|Q08788', 'yfiB|Q9I4L6', 'ompW|A0A0F4PBB9', 'sipW|P54506', 'HfsA|Q9A5L6', 'bslA|P71014']	2	bsl_ompu	drag-reducing_adhesion	2	1005928	Roseovarius lutimaris
GCA_012641465.1	15	['HfsD|Q9A5L5', 'OmpU|P0C6Q6', 'HfsF|Q9A5M1', 'HfsE|Q9A5M2', 'HfsH|Q9A5L9', 'HfsG|Q9A5M0', 'tpbB|A0A0H2Z7X0', 'ompA|A0A3B6XXR4', 'yfiB|Q9I4L6', 'GbpA|C3LW75', 'sipW|P54506', 'ChiA|P32823', 'HfsC|Q9A5L8', 'HfsA|Q9A5L6', 'SRFAD|Q08788']	4	hfs_chia_ompu_gbpa	adhesion_chitinase-production	2	2726741	Vibrio agarilyticus
GCA_000156335.1	14	['SRFAA|P27206', 'SRFAB|Q04747', 'HfsD|Q9A5L5', 'OmpU|P0C6Q6', 'HfsF|Q9A5M1', 'HfsE|Q9A5M2', 'HfsG|Q9A5M0', 'HfsH|Q9A5L9', 'yfiB|Q9I4L6', 'sipW|P54506', 'ChiA|P32823', 'HfsC|Q9A5L8', 'HfsA|Q9A5L6', 'SRFAD|Q08788']	3	hfs_chia_ompu	adhesion_chitinase-production	2	391589	Roseobacter sp. GAI101
GCA_002100145.1	16	['HfsD|Q9A5L5', 'Foo1|A1X158', 'HfsF|Q9A5M1', 'HfsE|Q9A5M2', 'HfsH|Q9A5L9', 'HfsG|Q9A5M0', 'OmpU|P0C6Q6', 'tpbB|A0A0H2Z7X0', 'ompA|A0A3B6XXR4', 'yfiB|Q9I4L6', 'sipW|P54506', 'ChiA|P32823', 'HfsC|Q9A5L8', 'HfaB|P27343', 'HfsA|Q9A5L6', 'SRFAD|Q08788']	5	hfs_hfacces_foo_chia_ompu	adhesion_chitinase-production	2	1603038	Vibrio sp. qd031
GCA_014077245.1	18	['HfsD|Q9A5L5', 'Foo1|A1X158', 'HfsF|Q9A5M1', 'HfsH|Q9A5L9', 'HfsG|Q9A5M0', 'OmpU|P0C6Q6', 'sdrC|A0A6A8FED6', 'ompA|A0A3B6XXR4', 'yfiB|Q9I4L6', 'ompW|A0A0F4PBB9', 'pilF|A0A290TXQ9', 'sipW|P54506', 'ChiA|P32823', 'HfsC|Q9A5L8', 'yfiR|Q9I4L4', 'HfaB|P27343', 'HfsA|Q9A5L6', 'SRFAD|Q08788']	6	hfacces_foo_chia_omp_ompu_sdrc	adhesion_chitinase-production	2	2759831	Colwellia sp. BRX8-9
GCA_001635795.1	20	['SRFAB|Q04747', 'Foo1|A1X158', 'ompA|A0A3B6XXR4', 'HfaB|P27343', 'SRFAA|P27206', 'OmpU|P0C6Q6', 'tpbB|A0A0H2Z7X0', 'ompW|A0A0F4PBB9', 'HfsD|Q9A5L5', 'HfsF|Q9A5M1', 'HfsE|Q9A5M2', 'HfsG|Q9A5M0', 'HfsH|Q9A5L9', 'yfiB|Q9I4L6', 'sipW|P54506', 'ChiA|P32823', 'HfsC|Q9A5L8', 'HfsA|Q9A5L6', 'sdrC|A0A6A8FED6', 'SRFAD|Q08788']	6	hfs_hfacces_foo_chia_ompu_sdrc	adhesion_chitinase-production	2	1822245	Oleiphilus sp. HI0069
GCA_002685995.1	14	['HfsD|Q9A5L5', 'OmpU|P0C6Q6', 'HfsF|Q9A5M1', 'HfsE|Q9A5M2', 'HfsH|Q9A5L9', 'HfsG|Q9A5M0', 'GalL|C0HLX7', 'sdrC|A0A6A8FED6', 'yfiB|Q9I4L6', 'ompW|A0A0F4PBB9', 'sipW|P54506', 'HfsC|Q9A5L8', 'HfsA|Q9A5L6', 'SRFAD|Q08788']	4	hfs_gal_ompu_sdrc	adhesion_colonization-resistance	2	2024841	Micavibrio sp.
GCA_014077305.1	19	['Foo1|A1X158', 'ompA|A0A3B6XXR4', 'HfaB|P27343', 'OmpU|P0C6Q6', 'tpbB|A0A0H2Z7X0', 'ompW|A0A0F4PBB9', 'pilF|A0A290TXQ9', 'HfsD|Q9A5L5', 'HfsF|Q9A5M1', 'HfsH|Q9A5L9', 'HfsG|Q9A5M0', 'yfiB|Q9I4L6', 'sipW|P54506', 'ChiA|P32823', 'HfsC|Q9A5L8', 'yfiR|Q9I4L4', 'HfsA|Q9A5L6', 'sdrC|A0A6A8FED6', 'SRFAD|Q08788']	7	hfacces_foo_chia_omp_yfi_ompu_sdrc	adhesion_chitinase-production	2	2759834	Colwellia sp. BRX8-6
GCA_002711135.1	19	['SRFAB|Q04747', 'HfaB|P27343', 'SRFAA|P27206', 'tpbB|A0A0H2Z7X0', 'RbmC|A0A2S1ZSI6', 'Bap1|Q9KQW0', 'HfsD|Q9A5L5', 'HfsF|Q9A5M1', 'HfsE|Q9A5M2', 'HfsG|Q9A5M0', 'HfsH|Q9A5L9', 'yfiB|Q9I4L6', 'sipW|P54506', 'ChiA|P32823', 'HfsC|Q9A5L8', 'yfiR|Q9I4L4', 'HfsA|Q9A5L6', 'sdrC|A0A6A8FED6', 'SRFAD|Q08788']	7	hfs_hfacces_chia_yfi_sdrc_bap1_rbmc	adhesion_chitinase-production	2	2026728	Crocinitomicaceae bacterium
GCA_007197735.1	16	['HfsD|Q9A5L5', 'HfsF|Q9A5M1', 'HfsE|Q9A5M2', 'HfsH|Q9A5L9', 'HfsG|Q9A5M0', 'tpbB|A0A0H2Z7X0', 'sdrC|A0A6A8FED6', 'ompA|A0A3B6XXR4', 'yfiB|Q9I4L6', 'sipW|P54506', 'RbmC|A0A2S1ZSI6', 'ChiA|P32823', 'HfsC|Q9A5L8', 'HfsA|Q9A5L6', 'Bap1|Q9KQW0', 'SRFAD|Q08788']	5	hfs_chia_sdrc_bap1_rbmc	adhesion_chitinase-production	2	2594004	Formosa sediminum
GCA_002157205.1	18	['SRFAA|P27206', 'SRFAB|Q04747', 'HfsD|Q9A5L5', 'OmpU|P0C6Q6', 'HfsF|Q9A5M1', 'HfsE|Q9A5M2', 'HfsG|Q9A5M0', 'HfsH|Q9A5L9', 'tpbB|A0A0H2Z7X0', 'SRFAC|Q08787', 'yfiB|Q9I4L6', 'ompW|A0A0F4PBB9', 'sipW|P54506', 'RbmC|A0A2S1ZSI6', 'HfsC|Q9A5L8', 'HfsA|Q9A5L6', 'Bap1|Q9KQW0', 'SRFAD|Q08788']	5	srf_hfs_ompu_bap1_rbmc	drag-reducing_adhesion	2	157779	Kushneria marisflavi
GCA_009363535.1	21	['SRFAB|Q04747', 'Foo1|A1X158', 'ompA|A0A3B6XXR4', 'HfaB|P27343', 'SRFAA|P27206', 'OmpU|P0C6Q6', 'ompW|A0A0F4PBB9', 'HfsD|Q9A5L5', 'HfsF|Q9A5M1', 'HfsE|Q9A5M2', 'HfsG|Q9A5M0', 'HfsH|Q9A5L9', 'SRFAC|Q08787', 'yfiB|Q9I4L6', 'sipW|P54506', 'HfsC|Q9A5L8', 'yfiR|Q9I4L4', 'HfsA|Q9A5L6', 'sdrC|A0A6A8FED6', 'GbpA|C3LW75', 'SRFAD|Q08788']	7	srf_hfs_hfacces_foo_ompu_sdrc_gbpa	drag-reducing_adhesion	2	2587856	Microbulbifer sp. THAF38
GCA_002697445.1	15	['HfsD|Q9A5L5', 'HfsF|Q9A5M1', 'HfsE|Q9A5M2', 'HfsH|Q9A5L9', 'HfsG|Q9A5M0', 'tpbB|A0A0H2Z7X0', 'sdrC|A0A6A8FED6', 'ompA|A0A3B6XXR4', 'yfiB|Q9I4L6', 'sipW|P54506', 'ChiA|P32823', 'HfsC|Q9A5L8', 'HfaB|P27343', 'HfsA|Q9A5L6', 'SRFAD|Q08788']	4	hfs_hfacces_chia_sdrc	adhesion_chitinase-production	2	2026787	Rhodothermaceae bacterium
GCA_002698965.1	12	['Foo1|A1X158', 'HfsG|Q9A5M0', 'HfsE|Q9A5M2', 'HfsH|Q9A5L9', 'ompA|A0A3B6XXR4', 'tasA|P54507', 'yfiB|Q9I4L6', 'sipW|P54506', 'ChiA|P32823', 'HfsC|Q9A5L8', 'HfaB|P27343', 'SRFAD|Q08788']	4	hfacces_foo_chia_tapA	adhesion_chitinase-production	2	2024855	Rhodopirellula sp.
GCA_001969365.1	14	['SRFAA|P27206', 'SRFAB|Q04747', 'HfsD|Q9A5L5', 'Foo1|A1X158', 'HfsF|Q9A5M1', 'HfsG|Q9A5M0', 'HfsH|Q9A5L9', 'OmpU|P0C6Q6', 'yfiB|Q9I4L6', 'ompW|A0A0F4PBB9', 'sipW|P54506', 'ChiA|P32823', 'HfsA|Q9A5L6', 'SRFAD|Q08788']	3	foo_chia_ompu	adhesion_chitinase-production	2	299262	Tateyamaria omphalii
GCA_002726085.1	16	['SRFAA|P27206', 'SRFAB|Q04747', 'HfsD|Q9A5L5', 'Foo1|A1X158', 'HfsF|Q9A5M1', 'HfsE|Q9A5M2', 'HfsG|Q9A5M0', 'HfsH|Q9A5L9', 'sdrC|A0A6A8FED6', 'yfiB|Q9I4L6', 'ompW|A0A0F4PBB9', 'sipW|P54506', 'ChiA|P32823', 'HfsC|Q9A5L8', 'HfaB|P27343', 'SRFAD|Q08788']	4	hfacces_foo_chia_sdrc	adhesion_chitinase-production	2	1978231	Acidobacteria bacterium
GCA_001971725.1	13	['HfsD|Q9A5L5', 'HfsF|Q9A5M1', 'HfsE|Q9A5M2', 'HfsH|Q9A5L9', 'HfsG|Q9A5M0', 'sdrC|A0A6A8FED6', 'yfiB|Q9I4L6', 'ompW|A0A0F4PBB9', 'sipW|P54506', 'ChiA|P32823', 'HfsC|Q9A5L8', 'HfsA|Q9A5L6', 'SRFAD|Q08788']	3	hfs_chia_sdrc	adhesion_chitinase-production	2	1936080	Winogradskyella sp. J14-2
GCA_002192415.1	17	['SRFAA|P27206', 'SRFAB|Q04747', 'HfsF|Q9A5M1', 'HfsE|Q9A5M2', 'HfsG|Q9A5M0', 'HfsH|Q9A5L9', 'tpbB|A0A0H2Z7X0', 'tasA|P54507', 'SRFAC|Q08787', 'ompA|A0A3B6XXR4', 'yfiB|Q9I4L6', 'sipW|P54506', 'RbmC|A0A2S1ZSI6', 'HfsC|Q9A5L8', 'HfsA|Q9A5L6', 'Bap1|Q9KQW0', 'SRFAD|Q08788']	4	srf_tapA_bap1_rbmc	drag-reducing_adhesion	2	414771	Paenibacillus donghaensis
GCA_004745115.1	18	['SRFAA|P27206', 'SRFAB|Q04747', 'HfsD|Q9A5L5', 'OmpU|P0C6Q6', 'HfsF|Q9A5M1', 'HfsE|Q9A5M2', 'HfsG|Q9A5M0', 'HfsH|Q9A5L9', 'ompA|A0A3B6XXR4', 'SRFAC|Q08787', 'yfiB|Q9I4L6', 'ompW|A0A0F4PBB9', 'sipW|P54506', 'HfsC|Q9A5L8', 'yfiR|Q9I4L4', 'HfaB|P27343', 'HfsA|Q9A5L6', 'SRFAD|Q08788']	4	srf_hfs_hfacces_ompu	drag-reducing_adhesion	2	2044468	Escherichia sp. E4930
GCA_002729155.1	10	['HfsD|Q9A5L5', 'HfsF|Q9A5M1', 'HfsG|Q9A5M0', 'pilF|A0A290TXQ9', 'sipW|P54506', 'RbmC|A0A2S1ZSI6', 'ChiA|P32823', 'HfsC|Q9A5L8', 'Bap1|Q9KQW0', 'SRFAD|Q08788']	3	chia_bap1_rbmc	chitinase-production_adhesion	2	1870902	Leifsonia sp.
GCA_009835145.1	13	['HfsD|Q9A5L5', 'OmpU|P0C6Q6', 'HfsF|Q9A5M1', 'HfsH|Q9A5L9', 'HfsG|Q9A5M0', 'GalL|C0HLX7', 'sdrC|A0A6A8FED6', 'yfiB|Q9I4L6', 'sipW|P54506', 'HfsC|Q9A5L8', 'HfaB|P27343', 'HfsA|Q9A5L6', 'SRFAD|Q08788']	4	hfacces_gal_ompu_sdrc	adhesion_colonization-resistance	2	1037889	Profundibacterium mesophilum
GCA_002699685.1	13	['OmpU|P0C6Q6', 'HfsF|Q9A5M1', 'HfsE|Q9A5M2', 'HfsH|Q9A5L9', 'HfsG|Q9A5M0', 'SRFAC|Q08787', 'yfiB|Q9I4L6', 'sipW|P54506', 'RbmC|A0A2S1ZSI6', 'ChiA|P32823', 'HfsC|Q9A5L8', 'Bap1|Q9KQW0', 'pilF|A0A290TXQ9']	4	chia_ompu_bap1_rbmc	chitinase-production_adhesion	2	1871037	Flavobacteriaceae bacterium
GCA_018491765.1	18	['HfsD|Q9A5L5', 'Foo1|A1X158', 'HfsF|Q9A5M1', 'HfsE|Q9A5M2', 'HfsH|Q9A5L9', 'HfsG|Q9A5M0', 'OmpU|P0C6Q6', 'ompA|A0A3B6XXR4', 'yfiB|Q9I4L6', 'ompW|A0A0F4PBB9', 'sipW|P54506', 'RbmC|A0A2S1ZSI6', 'ChiA|P32823', 'HfsC|Q9A5L8', 'HfaB|P27343', 'HfsA|Q9A5L6', 'Bap1|Q9KQW0', 'SRFAD|Q08788']	7	hfs_hfacces_foo_chia_ompu_bap1_rbmc	adhesion_chitinase-production	2	1774954	Novosphingobium profundi
GCA_002713305.1	12	['SRFAA|P27206', 'SRFAB|Q04747', 'HfsD|Q9A5L5', 'HfsF|Q9A5M1', 'bslB|P39632', 'HfsG|Q9A5M0', 'HfsH|Q9A5L9', 'sdrC|A0A6A8FED6', 'SRFAD|Q08788', 'yfiB|Q9I4L6', 'sipW|P54506', 'bslA|P71014']	2	bsl_sdrc	drag-reducing_adhesion	2	1903071	Sulfitobacter sp.
GCA_003584965.1	16	['HfsD|Q9A5L5', 'OmpU|P0C6Q6', 'HfsG|Q9A5M0', 'HfsE|Q9A5M2', 'ompA|A0A3B6XXR4', 'tpbB|A0A0H2Z7X0', 'yfiB|Q9I4L6', 'GbpA|C3LW75', 'sipW|P54506', 'RbmC|A0A2S1ZSI6', 'ChiA|P32823', 'HfsC|Q9A5L8', 'HfaB|P27343', 'HfsA|Q9A5L6', 'Bap1|Q9KQW0', 'SRFAD|Q08788']	6	hfacces_chia_ompu_bap1_rbmc_gbpa	adhesion_chitinase-production	2	1583767	Vibrio sp. PID23_8
GCA_002700405.1	12	['SRFAA|P27206', 'SRFAB|Q04747', 'OmpU|P0C6Q6', 'HfsF|Q9A5M1', 'HfsE|Q9A5M2', 'HfsG|Q9A5M0', 'sdrC|A0A6A8FED6', 'SRFAC|Q08787', 'yfiB|Q9I4L6', 'sipW|P54506', 'ChiA|P32823', 'HfsC|Q9A5L8']	3	chia_ompu_sdrc	chitinase-production_adhesion	2	1871037	Flavobacteriaceae bacterium
GCA_002684005.1	14	['HfsD|Q9A5L5', 'HfsF|Q9A5M1', 'HfsE|Q9A5M2', 'HfsH|Q9A5L9', 'HfsG|Q9A5M0', 'tpbB|A0A0H2Z7X0', 'sdrC|A0A6A8FED6', 'yfiB|Q9I4L6', 'ompW|A0A0F4PBB9', 'sipW|P54506', 'ChiA|P32823', 'HfsC|Q9A5L8', 'HfsA|Q9A5L6', 'SRFAD|Q08788']	3	hfs_chia_sdrc	adhesion_chitinase-production	2	2024824	Balneola sp.
GCA_900176285.1	15	['HfsD|Q9A5L5', 'HfsF|Q9A5M1', 'HfsE|Q9A5M2', 'HfsH|Q9A5L9', 'HfsG|Q9A5M0', 'yfiB|Q9I4L6', 'sipW|P54506', 'RbmC|A0A2S1ZSI6', 'ChiA|P32823', 'HfsC|Q9A5L8', 'yfiR|Q9I4L4', 'HfaB|P27343', 'HfsA|Q9A5L6', 'Bap1|Q9KQW0', 'SRFAD|Q08788']	5	hfs_hfacces_chia_bap1_rbmc	adhesion_chitinase-production	2	1121390	Desulfacinum hydrothermale
GCA_002730485.1	9	['HfsD|Q9A5L5', 'Foo1|A1X158', 'HfsG|Q9A5M0', 'HfsH|Q9A5L9', 'pilF|A0A290TXQ9', 'sipW|P54506', 'ChiA|P32823', 'HfsC|Q9A5L8', 'SRFAD|Q08788']	2	foo_chia	adhesion_chitinase-production	2	2026734	Dehalococcoidia bacterium
GCA_009184895.1	14	['HfsD|Q9A5L5', 'Foo1|A1X158', 'HfsF|Q9A5M1', 'HfsH|Q9A5L9', 'HfsG|Q9A5M0', 'tpbB|A0A0H2Z7X0', 'sdrC|A0A6A8FED6', 'sipW|P54506', 'RbmC|A0A2S1ZSI6', 'ChiA|P32823', 'HfsC|Q9A5L8', 'HfsA|Q9A5L6', 'Bap1|Q9KQW0', 'SRFAD|Q08788']	5	foo_chia_sdrc_bap1_rbmc	adhesion_chitinase-production	2	2653936	Tetrasphaera sp. F2B08
GCA_002716025.1	16	['HfsD|Q9A5L5', 'OmpU|P0C6Q6', 'HfsF|Q9A5M1', 'HfsH|Q9A5L9', 'HfsG|Q9A5M0', 'sdrC|A0A6A8FED6', 'ompA|A0A3B6XXR4', 'yfiB|Q9I4L6', 'ompW|A0A0F4PBB9', 'sipW|P54506', 'RbmC|A0A2S1ZSI6', 'ChiA|P32823', 'HfaB|P27343', 'HfsA|Q9A5L6', 'Bap1|Q9KQW0', 'SRFAD|Q08788']	6	hfacces_chia_ompu_sdrc_bap1_rbmc	adhesion_chitinase-production	2	1874361	Idiomarina sp.
GCA_002875605.1	20	['SRFAB|Q04747', 'ompA|A0A3B6XXR4', 'HfaB|P27343', 'SRFAA|P27206', 'OmpU|P0C6Q6', 'tpbB|A0A0H2Z7X0', 'ompW|A0A0F4PBB9', 'RbmC|A0A2S1ZSI6', 'Bap1|Q9KQW0', 'HfsD|Q9A5L5', 'HfsG|Q9A5M0', 'HfsH|Q9A5L9', 'yfiB|Q9I4L6', 'sipW|P54506', 'ChiA|P32823', 'HfsC|Q9A5L8', 'yfiR|Q9I4L4', 'HfsA|Q9A5L6', 'GbpA|C3LW75', 'SRFAD|Q08788']	7	hfacces_chia_yfi_ompu_bap1_rbmc_gbpa	adhesion_chitinase-production	2	1880842	Vibrio sp. 10N.261.45.A6
GCA_002710845.1	7	['HfsF|Q9A5M1', 'HfsH|Q9A5L9', 'sdrC|A0A6A8FED6', 'tpbB|A0A0H2Z7X0', 'ompA|A0A3B6XXR4', 'ChiA|P32823', 'HfaB|P27343']	3	hfacces_chia_sdrc	adhesion_chitinase-production	2	2026760	Candidatus Marinimicrobia bacterium
GCA_002717695.1	16	['HfsD|Q9A5L5', 'Foo1|A1X158', 'HfsF|Q9A5M1', 'HfsE|Q9A5M2', 'HfsH|Q9A5L9', 'HfsG|Q9A5M0', 'tpbB|A0A0H2Z7X0', 'sdrC|A0A6A8FED6', 'ompA|A0A3B6XXR4', 'sipW|P54506', 'RbmC|A0A2S1ZSI6', 'ChiA|P32823', 'HfsC|Q9A5L8', 'HfaB|P27343', 'HfsA|Q9A5L6', 'Bap1|Q9KQW0']	7	hfs_hfacces_foo_chia_sdrc_bap1_rbmc	adhesion_chitinase-production	2	2026760	Candidatus Marinimicrobia bacterium
GCA_015143645.1	15	['SRFAA|P27206', 'SRFAB|Q04747', 'Foo1|A1X158', 'HfsF|Q9A5M1', 'HfsE|Q9A5M2', 'HfsG|Q9A5M0', 'HfsH|Q9A5L9', 'tpbB|A0A0H2Z7X0', 'ompA|A0A3B6XXR4', 'SRFAC|Q08787', 'yfiB|Q9I4L6', 'sipW|P54506', 'HfsC|Q9A5L8', 'HfsA|Q9A5L6', 'SRFAD|Q08788']	2	srf_foo	drag-reducing_adhesion	2	2697367	Paenibacillus sp. P13VS
GCA_000314975.1	23	['SRFAB|Q04747', 'Foo1|A1X158', 'ompA|A0A3B6XXR4', 'HfaB|P27343', 'SRFAA|P27206', 'OmpU|P0C6Q6', 'ompW|A0A0F4PBB9', 'RbmC|A0A2S1ZSI6', 'Bap1|Q9KQW0', 'pilF|A0A290TXQ9', 'HfsD|Q9A5L5', 'HfsF|Q9A5M1', 'HfsE|Q9A5M2', 'HfsG|Q9A5M0', 'HfsH|Q9A5L9', 'yfiB|Q9I4L6', 'sipW|P54506', 'ChiA|P32823', 'HfsC|Q9A5L8', 'yfiR|Q9I4L4', 'HfsA|Q9A5L6', 'sdrC|A0A6A8FED6', 'SRFAD|Q08788']	9	hfs_hfacces_foo_chia_omp_ompu_sdrc_bap1_rbmc	adhesion_chitinase-production	2	1127673	Aliiglaciecola lipolytica
GCA_002725655.1	11	['SRFAA|P27206', 'SRFAB|Q04747', 'HfsD|Q9A5L5', 'HfsF|Q9A5M1', 'HfsE|Q9A5M2', 'HfsG|Q9A5M0', 'sdrC|A0A6A8FED6', 'SRFAC|Q08787', 'yfiB|Q9I4L6', 'sipW|P54506', 'ChiA|P32823']	2	chia_sdrc	chitinase-production_adhesion	2	2026772	Opitutales bacterium
GCA_001303495.1	13	['HfsD|Q9A5L5', 'Foo1|A1X158', 'HfsF|Q9A5M1', 'HfsG|Q9A5M0', 'OmpU|P0C6Q6', 'tpbB|A0A0H2Z7X0', 'yfiB|Q9I4L6', 'sipW|P54506', 'RbmC|A0A2S1ZSI6', 'ChiA|P32823', 'HfsC|Q9A5L8', 'Bap1|Q9KQW0', 'SRFAD|Q08788']	5	foo_chia_ompu_bap1_rbmc	adhesion_chitinase-production	2	1703406	Gammaproteobacteria bacterium SG8_47
GCA_002742285.1	13	['SRFAA|P27206', 'SRFAB|Q04747', 'HfsD|Q9A5L5', 'OmpU|P0C6Q6', 'HfsG|Q9A5M0', 'HfsH|Q9A5L9', 'sdrC|A0A6A8FED6', 'SRFAC|Q08787', 'yfiB|Q9I4L6', 'sipW|P54506', 'HfsC|Q9A5L8', 'HfsA|Q9A5L6', 'SRFAD|Q08788']	3	srf_ompu_sdrc	drag-reducing_adhesion	2	1889778	Amylibacter kogurei
GCA_015207935.1	17	['HfsD|Q9A5L5', 'Foo1|A1X158', 'HfsF|Q9A5M1', 'HfsE|Q9A5M2', 'HfsH|Q9A5L9', 'HfsG|Q9A5M0', 'tpbB|A0A0H2Z7X0', 'sdrC|A0A6A8FED6', 'ompA|A0A3B6XXR4', 'sipW|P54506', 'RbmC|A0A2S1ZSI6', 'ChiA|P32823', 'HfsC|Q9A5L8', 'HfaB|P27343', 'HfsA|Q9A5L6', 'Bap1|Q9KQW0', 'SRFAD|Q08788']	7	hfs_hfacces_foo_chia_sdrc_bap1_rbmc	adhesion_chitinase-production	2	1828742	Synechocystis salina
GCA_002685255.1	17	['HfsD|Q9A5L5', 'Foo1|A1X158', 'HfsF|Q9A5M1', 'HfsH|Q9A5L9', 'HfsG|Q9A5M0', 'OmpU|P0C6Q6', 'sdrC|A0A6A8FED6', 'yfiB|Q9I4L6', 'ompW|A0A0F4PBB9', 'sipW|P54506', 'RbmC|A0A2S1ZSI6', 'ChiA|P32823', 'HfsC|Q9A5L8', 'HfaB|P27343', 'HfsA|Q9A5L6', 'Bap1|Q9KQW0', 'SRFAD|Q08788']	7	hfacces_foo_chia_ompu_sdrc_bap1_rbmc	adhesion_chitinase-production	2	1898113	Idiomarinaceae bacterium
GCA_007785775.2	15	['HfsD|Q9A5L5', 'Foo1|A1X158', 'HfsF|Q9A5M1', 'HfsG|Q9A5M0', 'OmpU|P0C6Q6', 'tpbB|A0A0H2Z7X0', 'sdrC|A0A6A8FED6', 'ompA|A0A3B6XXR4', 'yfiB|Q9I4L6', 'ompW|A0A0F4PBB9', 'sipW|P54506', 'ChiA|P32823', 'HfsC|Q9A5L8', 'HfaB|P27343', 'HfsA|Q9A5L6']	5	hfacces_foo_chia_ompu_sdrc	adhesion_chitinase-production	2	2597517	Muricauda hadalis
GCA_002716005.1	15	['HfsD|Q9A5L5', 'HfsF|Q9A5M1', 'HfsE|Q9A5M2', 'HfsH|Q9A5L9', 'HfsG|Q9A5M0', 'tpbB|A0A0H2Z7X0', 'sdrC|A0A6A8FED6', 'ompA|A0A3B6XXR4', 'yfiB|Q9I4L6', 'sipW|P54506', 'RbmC|A0A2S1ZSI6', 'ChiA|P32823', 'HfsC|Q9A5L8', 'Bap1|Q9KQW0', 'SRFAD|Q08788']	4	chia_sdrc_bap1_rbmc	chitinase-production_adhesion	2	1977054	Leeuwenhoekiella sp.
GCA_002696185.1	17	['HfsD|Q9A5L5', 'Foo1|A1X158', 'HfsF|Q9A5M1', 'HfsE|Q9A5M2', 'HfsH|Q9A5L9', 'HfsG|Q9A5M0', 'OmpU|P0C6Q6', 'sdrC|A0A6A8FED6', 'ompA|A0A3B6XXR4', 'yfiB|Q9I4L6', 'ompW|A0A0F4PBB9', 'sipW|P54506', 'ChiA|P32823', 'HfsC|Q9A5L8', 'HfaB|P27343', 'HfsA|Q9A5L6', 'SRFAD|Q08788']	6	hfs_hfacces_foo_chia_ompu_sdrc	adhesion_chitinase-production	2	1872427	Alcanivorax sp.
GCA_002875885.1	20	['SRFAB|Q04747', 'ompA|A0A3B6XXR4', 'HfaB|P27343', 'SRFAA|P27206', 'OmpU|P0C6Q6', 'tpbB|A0A0H2Z7X0', 'ompW|A0A0F4PBB9', 'RbmC|A0A2S1ZSI6', 'Bap1|Q9KQW0', 'HfsD|Q9A5L5', 'HfsG|Q9A5M0', 'HfsH|Q9A5L9', 'yfiB|Q9I4L6', 'sipW|P54506', 'ChiA|P32823', 'HfsC|Q9A5L8', 'yfiR|Q9I4L4', 'HfsA|Q9A5L6', 'GbpA|C3LW75', 'SRFAD|Q08788']	7	hfacces_chia_yfi_ompu_bap1_rbmc_gbpa	adhesion_chitinase-production	2	1880845	Vibrio sp. 10N.261.46.E8
GCA_000775725.1	20	['ompA|A0A3B6XXR4', 'HfaB|P27343', 'OmpU|P0C6Q6', 'tpbB|A0A0H2Z7X0', 'RbmC|A0A2S1ZSI6', 'Bap1|Q9KQW0', 'HfsD|Q9A5L5', 'HfsF|Q9A5M1', 'HfsE|Q9A5M2', 'HfsH|Q9A5L9', 'HfsG|Q9A5M0', 'yfiB|Q9I4L6', 'sipW|P54506', 'ChiA|P32823', 'HfsC|Q9A5L8', 'yfiR|Q9I4L4', 'HfsA|Q9A5L6', 'sdrC|A0A6A8FED6', 'GbpA|C3LW75', 'SRFAD|Q08788']	9	hfs_hfacces_chia_yfi_ompu_sdrc_bap1_rbmc_gbpa	adhesion_chitinase-production	2	379097	Vibrio sinaloensis
GCA_002697745.1	17	['SRFAA|P27206', 'SRFAB|Q04747', 'HfsD|Q9A5L5', 'HfsF|Q9A5M1', 'HfsE|Q9A5M2', 'HfsG|Q9A5M0', 'HfsH|Q9A5L9', 'sdrC|A0A6A8FED6', 'SRFAC|Q08787', 'yfiB|Q9I4L6', 'pilF|A0A290TXQ9', 'sipW|P54506', 'RbmC|A0A2S1ZSI6', 'HfsC|Q9A5L8', 'HfsA|Q9A5L6', 'Bap1|Q9KQW0', 'SRFAD|Q08788']	5	srf_hfs_sdrc_bap1_rbmc	drag-reducing_adhesion	2	1872084	Nitratireductor sp.
GCA_002698985.1	15	['SRFAA|P27206', 'SRFAB|Q04747', 'HfsD|Q9A5L5', 'HfsF|Q9A5M1', 'HfsE|Q9A5M2', 'HfsG|Q9A5M0', 'HfsH|Q9A5L9', 'tpbB|A0A0H2Z7X0', 'sdrC|A0A6A8FED6', 'SRFAC|Q08787', 'ompA|A0A3B6XXR4', 'yfiB|Q9I4L6', 'HfsC|Q9A5L8', 'HfsA|Q9A5L6', 'SRFAD|Q08788']	3	srf_hfs_sdrc	drag-reducing_adhesion	2	2026790	Saprospirales bacterium
GCA_003355455.1	17	['HfsD|Q9A5L5', 'OmpU|P0C6Q6', 'HfsF|Q9A5M1', 'HfsE|Q9A5M2', 'HfsH|Q9A5L9', 'HfsG|Q9A5M0', 'tpbB|A0A0H2Z7X0', 'yfiB|Q9I4L6', 'ompW|A0A0F4PBB9', 'sipW|P54506', 'RbmC|A0A2S1ZSI6', 'ChiA|P32823', 'HfsC|Q9A5L8', 'HfaB|P27343', 'HfsA|Q9A5L6', 'Bap1|Q9KQW0', 'SRFAD|Q08788']	6	hfs_hfacces_chia_ompu_bap1_rbmc	adhesion_chitinase-production	2	2182384	Erythrobacter aureus
GCA_014164455.1	20	['ompA|A0A3B6XXR4', 'HfaB|P27343', 'OmpU|P0C6Q6', 'tpbB|A0A0H2Z7X0', 'ompW|A0A0F4PBB9', 'RbmC|A0A2S1ZSI6', 'Bap1|Q9KQW0', 'HfsD|Q9A5L5', 'HfsF|Q9A5M1', 'HfsE|Q9A5M2', 'HfsH|Q9A5L9', 'HfsG|Q9A5M0', 'yfiB|Q9I4L6', 'sipW|P54506', 'ChiA|P32823', 'HfsC|Q9A5L8', 'HfsA|Q9A5L6', 'sdrC|A0A6A8FED6', 'GbpA|C3LW75', 'SRFAD|Q08788']	8	hfs_hfacces_chia_ompu_sdrc_bap1_rbmc_gbpa	adhesion_chitinase-production	2	2760974	Pseudoalteromonas sp. SG41-6
GCA_000185805.1	15	['HfsD|Q9A5L5', 'HfsF|Q9A5M1', 'HfsE|Q9A5M2', 'HfsH|Q9A5L9', 'HfsG|Q9A5M0', 'tpbB|A0A0H2Z7X0', 'sdrC|A0A6A8FED6', 'yfiB|Q9I4L6', 'sipW|P54506', 'RbmC|A0A2S1ZSI6', 'ChiA|P32823', 'HfsC|Q9A5L8', 'HfaB|P27343', 'HfsA|Q9A5L6', 'Bap1|Q9KQW0']	6	hfs_hfacces_chia_sdrc_bap1_rbmc	adhesion_chitinase-production	2	648996	Thermovibrio ammonificans
GCA_014077345.1	19	['Foo1|A1X158', 'ompA|A0A3B6XXR4', 'HfaB|P27343', 'OmpU|P0C6Q6', 'tpbB|A0A0H2Z7X0', 'ompW|A0A0F4PBB9', 'pilF|A0A290TXQ9', 'HfsD|Q9A5L5', 'HfsF|Q9A5M1', 'HfsH|Q9A5L9', 'HfsG|Q9A5M0', 'yfiB|Q9I4L6', 'sipW|P54506', 'ChiA|P32823', 'HfsC|Q9A5L8', 'yfiR|Q9I4L4', 'HfsA|Q9A5L6', 'sdrC|A0A6A8FED6', 'SRFAD|Q08788']	7	hfacces_foo_chia_omp_yfi_ompu_sdrc	adhesion_chitinase-production	2	2759836	Colwellia sp. BRX8-4
GCA_002695645.1	12	['HfsD|Q9A5L5', 'HfsF|Q9A5M1', 'HfsE|Q9A5M2', 'HfsG|Q9A5M0', 'tpbB|A0A0H2Z7X0', 'sdrC|A0A6A8FED6', 'yfiB|Q9I4L6', 'sipW|P54506', 'ChiA|P32823', 'HfsC|Q9A5L8', 'yfiR|Q9I4L4', 'SRFAD|Q08788']	3	chia_yfi_sdrc	chitinase-production_adhesion	2	2026771	Opitutae bacterium
GCA_002714575.1	17	['HfsD|Q9A5L5', 'HfsF|Q9A5M1', 'HfsE|Q9A5M2', 'HfsH|Q9A5L9', 'HfsG|Q9A5M0', 'tpbB|A0A0H2Z7X0', 'ompA|A0A3B6XXR4', 'yfiB|Q9I4L6', 'ompW|A0A0F4PBB9', 'sipW|P54506', 'RbmC|A0A2S1ZSI6', 'ChiA|P32823', 'HfsC|Q9A5L8', 'yfiR|Q9I4L4', 'HfsA|Q9A5L6', 'Bap1|Q9KQW0', 'SRFAD|Q08788']	5	hfs_chia_yfi_bap1_rbmc	adhesion_chitinase-production	2	239	Flavobacterium sp.
GCA_001304155.1	11	['HfsD|Q9A5L5', 'HfsF|Q9A5M1', 'HfsE|Q9A5M2', 'HfsH|Q9A5L9', 'HfsG|Q9A5M0', 'sdrC|A0A6A8FED6', 'ompA|A0A3B6XXR4', 'SRFAC|Q08787', 'sipW|P54506', 'ChiA|P32823', 'HfsC|Q9A5L8']	2	chia_sdrc	chitinase-production_adhesion	2	1703427	candidate division Zixibacteria bacterium SM23_73_3
GCA_002695655.1	12	['HfsD|Q9A5L5', 'HfsF|Q9A5M1', 'HfsE|Q9A5M2', 'HfsH|Q9A5L9', 'HfsG|Q9A5M0', 'tpbB|A0A0H2Z7X0', 'sdrC|A0A6A8FED6', 'yfiB|Q9I4L6', 'sipW|P54506', 'ChiA|P32823', 'HfsC|Q9A5L8', 'HfsA|Q9A5L6']	3	hfs_chia_sdrc	adhesion_chitinase-production	2	2026801	Verrucomicrobiales bacterium
GCA_000816475.1	19	['ompA|A0A3B6XXR4', 'HfaB|P27343', 'OmpU|P0C6Q6', 'tpbB|A0A0H2Z7X0', 'RbmC|A0A2S1ZSI6', 'Bap1|Q9KQW0', 'HfsD|Q9A5L5', 'HfsF|Q9A5M1', 'HfsE|Q9A5M2', 'HfsG|Q9A5M0', 'yfiB|Q9I4L6', 'sipW|P54506', 'ChiA|P32823', 'HfsC|Q9A5L8', 'yfiR|Q9I4L4', 'HfsA|Q9A5L6', 'sdrC|A0A6A8FED6', 'GbpA|C3LW75', 'SRFAD|Q08788']	8	hfacces_chia_yfi_ompu_sdrc_bap1_rbmc_gbpa	adhesion_chitinase-production	2	379097	Vibrio sinaloensis
GCA_001303225.1	16	['SRFAA|P27206', 'SRFAB|Q04747', 'HfsD|Q9A5L5', 'OmpU|P0C6Q6', 'HfsG|Q9A5M0', 'HfsE|Q9A5M2', 'HfsH|Q9A5L9', 'sdrC|A0A6A8FED6', 'SRFAC|Q08787', 'yfiB|Q9I4L6', 'sipW|P54506', 'RbmC|A0A2S1ZSI6', 'ChiA|P32823', 'HfsC|Q9A5L8', 'HfsA|Q9A5L6', 'Bap1|Q9KQW0']	5	chia_ompu_sdrc_bap1_rbmc	chitinase-production_adhesion	2	1703772	candidate division TA06 bacterium DG_78
GCA_002686675.1	11	['HfsF|Q9A5M1', 'HfsG|Q9A5M0', 'sdrC|A0A6A8FED6', 'tpbB|A0A0H2Z7X0', 'ompA|A0A3B6XXR4', 'sipW|P54506', 'RbmC|A0A2S1ZSI6', 'ChiA|P32823', 'HfsC|Q9A5L8', 'HfaB|P27343', 'Bap1|Q9KQW0']	5	hfacces_chia_sdrc_bap1_rbmc	adhesion_chitinase-production	2	2026760	Candidatus Marinimicrobia bacterium
GCA_003626645.1	22	['SRFAB|Q04747', 'CHPC|Q9AD93', 'Foo1|A1X158', 'ompA|A0A3B6XXR4', 'CHPE|Q9X9Z2', 'SRFAA|P27206', 'CHPG|Q9KYH3', 'CHPA|Q8CJY7', 'HfsD|Q9A5L5', 'HfsF|Q9A5M1', 'HfsE|Q9A5M2', 'HfsG|Q9A5M0', 'HfsH|Q9A5L9', 'SRFAC|Q08787', 'yfiB|Q9I4L6', 'CHPF|Q9KYG7', 'CHPH|Q9AD92', 'sipW|P54506', 'CHPB|Q9X7U2', 'CHPD|Q9L1J9', 'GbpA|C3LW75', 'SRFAD|Q08788']	4	srf_chp_foo_gbpa	drag-reducing_adhesion	2	1420899	Streptomyces klenkii
GCA_002704905.1	10	['HfsF|Q9A5M1', 'HfsG|Q9A5M0', 'sdrC|A0A6A8FED6', 'tpbB|A0A0H2Z7X0', 'ompA|A0A3B6XXR4', 'yfiB|Q9I4L6', 'RbmC|A0A2S1ZSI6', 'ChiA|P32823', 'HfsC|Q9A5L8', 'Bap1|Q9KQW0']	4	chia_sdrc_bap1_rbmc	chitinase-production_adhesion	2	2026760	Candidatus Marinimicrobia bacterium
GCA_000737595.1	11	['HfsD|Q9A5L5', 'HfsF|Q9A5M1', 'HfsE|Q9A5M2', 'HfsG|Q9A5M0', 'sipW|P54506', 'RbmC|A0A2S1ZSI6', 'ChiA|P32823', 'HfsC|Q9A5L8', 'HfaB|P27343', 'Bap1|Q9KQW0', 'SRFAD|Q08788']	4	hfacces_chia_bap1_rbmc	adhesion_chitinase-production	2	585425	Synechococcus sp. KORDI-52
GCA_001634975.1	18	['HfsD|Q9A5L5', 'Foo1|A1X158', 'HfsF|Q9A5M1', 'HfsE|Q9A5M2', 'HfsH|Q9A5L9', 'HfsG|Q9A5M0', 'OmpU|P0C6Q6', 'tpbB|A0A0H2Z7X0', 'sdrC|A0A6A8FED6', 'ompA|A0A3B6XXR4', 'yfiB|Q9I4L6', 'ompW|A0A0F4PBB9', 'sipW|P54506', 'ChiA|P32823', 'HfsC|Q9A5L8', 'HfaB|P27343', 'HfsA|Q9A5L6', 'SRFAD|Q08788']	6	hfs_hfacces_foo_chia_ompu_sdrc	adhesion_chitinase-production	2	1822247	Oleiphilus sp. HI0072
GCA_014164385.1	20	['Foo1|A1X158', 'ompA|A0A3B6XXR4', 'HfaB|P27343', 'OmpU|P0C6Q6', 'tpbB|A0A0H2Z7X0', 'ompW|A0A0F4PBB9', 'HfsD|Q9A5L5', 'HfsF|Q9A5M1', 'HfsE|Q9A5M2', 'HfsH|Q9A5L9', 'HfsG|Q9A5M0', 'yfiB|Q9I4L6', 'sipW|P54506', 'ChiA|P32823', 'HfsC|Q9A5L8', 'yfiR|Q9I4L4', 'HfsA|Q9A5L6', 'sdrC|A0A6A8FED6', 'GbpA|C3LW75', 'SRFAD|Q08788']	8	hfs_hfacces_foo_chia_yfi_ompu_sdrc_gbpa	adhesion_chitinase-production	2	2760970	Pseudoalteromonas sp. SG43-3
GCA_014164075.1	19	['Foo1|A1X158', 'ompA|A0A3B6XXR4', 'HfaB|P27343', 'OmpU|P0C6Q6', 'tpbB|A0A0H2Z7X0', 'ompW|A0A0F4PBB9', 'HfsD|Q9A5L5', 'HfsG|Q9A5M0', 'HfsE|Q9A5M2', 'HfsH|Q9A5L9', 'yfiB|Q9I4L6', 'sipW|P54506', 'ChiA|P32823', 'HfsC|Q9A5L8', 'yfiR|Q9I4L4', 'HfsA|Q9A5L6', 'sdrC|A0A6A8FED6', 'GbpA|C3LW75', 'SRFAD|Q08788']	7	hfacces_foo_chia_yfi_ompu_sdrc_gbpa	adhesion_chitinase-production	2	2760955	Pseudoalteromonas sp. SG45-3
GCA_002714225.1	8	['HfsG|Q9A5M0', 'ompA|A0A3B6XXR4', 'yfiB|Q9I4L6', 'pilF|A0A290TXQ9', 'RbmC|A0A2S1ZSI6', 'ChiA|P32823', 'Bap1|Q9KQW0', 'SRFAD|Q08788']	3	chia_bap1_rbmc	chitinase-production_adhesion	2	2024894	Acidimicrobiaceae bacterium
GCA_002877735.1	20	['SRFAB|Q04747', 'ompA|A0A3B6XXR4', 'HfaB|P27343', 'SRFAA|P27206', 'OmpU|P0C6Q6', 'tpbB|A0A0H2Z7X0', 'ompW|A0A0F4PBB9', 'RbmC|A0A2S1ZSI6', 'Bap1|Q9KQW0', 'HfsD|Q9A5L5', 'HfsG|Q9A5M0', 'HfsH|Q9A5L9', 'yfiB|Q9I4L6', 'sipW|P54506', 'ChiA|P32823', 'HfsC|Q9A5L8', 'yfiR|Q9I4L4', 'HfsA|Q9A5L6', 'GbpA|C3LW75', 'SRFAD|Q08788']	7	hfacces_chia_yfi_ompu_bap1_rbmc_gbpa	adhesion_chitinase-production	2	1884475	Vibrio sp. 10N.261.54.E10
GCA_001886455.1	21	['Foo1|A1X158', 'ompA|A0A3B6XXR4', 'HfaB|P27343', 'OmpU|P0C6Q6', 'tpbB|A0A0H2Z7X0', 'ompW|A0A0F4PBB9', 'RbmC|A0A2S1ZSI6', 'Bap1|Q9KQW0', 'pilF|A0A290TXQ9', 'HfsD|Q9A5L5', 'HfsG|Q9A5M0', 'HfsE|Q9A5M2', 'HfsH|Q9A5L9', 'yfiB|Q9I4L6', 'sipW|P54506', 'ChiA|P32823', 'HfsC|Q9A5L8', 'HfsA|Q9A5L6', 'sdrC|A0A6A8FED6', 'GbpA|C3LW75', 'SRFAD|Q08788']	9	hfacces_foo_chia_omp_ompu_sdrc_bap1_rbmc_gbpa	adhesion_chitinase-production	2	314275	Alteromonas mediterranea
GCA_007993065.1	11	['HfsD|Q9A5L5', 'OmpU|P0C6Q6', 'HfsF|Q9A5M1', 'HfsH|Q9A5L9', 'HfsG|Q9A5M0', 'yfiB|Q9I4L6', 'sipW|P54506', 'ChiA|P32823', 'HfsC|Q9A5L8', 'HfsA|Q9A5L6', 'SRFAD|Q08788']	2	chia_ompu	chitinase-production_adhesion	2	2599412	Paracoccus aurantiacus
GCA_900188275.1	20	['SRFAB|Q04747', 'Foo1|A1X158', 'ompA|A0A3B6XXR4', 'HfaB|P27343', 'SRFAA|P27206', 'tpbB|A0A0H2Z7X0', 'HfsD|Q9A5L5', 'HfsF|Q9A5M1', 'HfsE|Q9A5M2', 'HfsG|Q9A5M0', 'HfsH|Q9A5L9', 'GalL|C0HLX7', 'tasA|P54507', 'yfiB|Q9I4L6', 'sipW|P54506', 'HfsC|Q9A5L8', 'yfiR|Q9I4L4', 'HfsA|Q9A5L6', 'sdrC|A0A6A8FED6', 'SRFAD|Q08788']	7	hfs_hfacces_foo_gal_tapA_yfi_sdrc	adhesion_colonization-resistance	2	1627892	Dokdonia pacifica
GCA_002686835.1	11	['HfsD|Q9A5L5', 'OmpU|P0C6Q6', 'HfsF|Q9A5M1', 'HfsE|Q9A5M2', 'HfsG|Q9A5M0', 'sdrC|A0A6A8FED6', 'yfiB|Q9I4L6', 'sipW|P54506', 'ChiA|P32823', 'HfsC|Q9A5L8', 'SRFAD|Q08788']	3	chia_ompu_sdrc	chitinase-production_adhesion	2	2026771	Opitutae bacterium
GCA_002714365.1	16	['SRFAA|P27206', 'SRFAB|Q04747', 'HfsD|Q9A5L5', 'OmpU|P0C6Q6', 'HfsF|Q9A5M1', 'HfsG|Q9A5M0', 'HfsH|Q9A5L9', 'tpbB|A0A0H2Z7X0', 'SRFAC|Q08787', 'yfiB|Q9I4L6', 'ompW|A0A0F4PBB9', 'sipW|P54506', 'RbmC|A0A2S1ZSI6', 'HfsC|Q9A5L8', 'Bap1|Q9KQW0', 'SRFAD|Q08788']	4	srf_ompu_bap1_rbmc	drag-reducing_adhesion	2	1912094	Thalassospira sp.
GCA_000195335.1	10	['HfsD|Q9A5L5', 'HfsF|Q9A5M1', 'HfsE|Q9A5M2', 'HfsH|Q9A5L9', 'HfsG|Q9A5M0', 'ompA|A0A3B6XXR4', 'sipW|P54506', 'ChiA|P32823', 'HfsC|Q9A5L8', 'HfsA|Q9A5L6']	2	hfs_chia	adhesion_chitinase-production	2	869210	Marinithermus hydrothermalis
GCA_002877015.1	17	['HfsD|Q9A5L5', 'OmpU|P0C6Q6', 'HfsF|Q9A5M1', 'HfsE|Q9A5M2', 'HfsH|Q9A5L9', 'HfsG|Q9A5M0', 'ompA|A0A3B6XXR4', 'yfiB|Q9I4L6', 'GbpA|C3LW75', 'sipW|P54506', 'ChiA|P32823', 'HfsC|Q9A5L8', 'yfiR|Q9I4L4', 'HfaB|P27343', 'HfsA|Q9A5L6', 'Bap1|Q9KQW0', 'SRFAD|Q08788']	6	hfs_hfacces_chia_ompu_bap1_gbpa	adhesion_chitinase-production	2	188144	Enterovibrio norvegicus
GCA_003605645.1	20	['ompA|A0A3B6XXR4', 'HfaB|P27343', 'OmpU|P0C6Q6', 'tpbB|A0A0H2Z7X0', 'RbmC|A0A2S1ZSI6', 'Bap1|Q9KQW0', 'HfsD|Q9A5L5', 'HfsF|Q9A5M1', 'HfsE|Q9A5M2', 'HfsH|Q9A5L9', 'HfsG|Q9A5M0', 'yfiB|Q9I4L6', 'sipW|P54506', 'ChiA|P32823', 'HfsC|Q9A5L8', 'yfiR|Q9I4L4', 'HfsA|Q9A5L6', 'sdrC|A0A6A8FED6', 'GbpA|C3LW75', 'SRFAD|Q08788']	9	hfs_hfacces_chia_yfi_ompu_sdrc_bap1_rbmc_gbpa	adhesion_chitinase-production	2	2302434	Vibrio sinensis
GCA_002684655.1	15	['SRFAA|P27206', 'SRFAB|Q04747', 'HfsD|Q9A5L5', 'OmpU|P0C6Q6', 'HfsF|Q9A5M1', 'HfsE|Q9A5M2', 'HfsG|Q9A5M0', 'HfsH|Q9A5L9', 'sdrC|A0A6A8FED6', 'yfiB|Q9I4L6', 'sipW|P54506', 'ChiA|P32823', 'HfsC|Q9A5L8', 'HfsA|Q9A5L6', 'SRFAD|Q08788']	4	hfs_chia_ompu_sdrc	adhesion_chitinase-production	2	2026780	Planctomycetota bacterium
GCA_002715025.1	14	['HfsD|Q9A5L5', 'HfsF|Q9A5M1', 'HfsH|Q9A5L9', 'HfsG|Q9A5M0', 'tpbB|A0A0H2Z7X0', 'tasA|P54507', 'sdrC|A0A6A8FED6', 'yfiB|Q9I4L6', 'sipW|P54506', 'ChiA|P32823', 'HfsC|Q9A5L8', 'HfaB|P27343', 'HfsA|Q9A5L6', 'SRFAD|Q08788']	4	hfacces_chia_tapA_sdrc	adhesion_chitinase-production	2	2026740	Flammeovirgaceae bacterium
GCA_002874435.1	17	['HfsD|Q9A5L5', 'OmpU|P0C6Q6', 'HfsG|Q9A5M0', 'HfsE|Q9A5M2', 'HfsH|Q9A5L9', 'tpbB|A0A0H2Z7X0', 'ompA|A0A3B6XXR4', 'yfiB|Q9I4L6', 'ompW|A0A0F4PBB9', 'GbpA|C3LW75', 'sipW|P54506', 'ChiA|P32823', 'HfsC|Q9A5L8', 'yfiR|Q9I4L4', 'HfaB|P27343', 'HfsA|Q9A5L6', 'SRFAD|Q08788']	5	hfacces_chia_yfi_ompu_gbpa	adhesion_chitinase-production	2	136468	Vibrio lentus
GCA_002711205.1	12	['HfsD|Q9A5L5', 'HfsF|Q9A5M1', 'HfsH|Q9A5L9', 'HfsG|Q9A5M0', 'sdrC|A0A6A8FED6', 'yfiB|Q9I4L6', 'ompW|A0A0F4PBB9', 'sipW|P54506', 'ChiA|P32823', 'HfsC|Q9A5L8', 'HfaB|P27343', 'SRFAD|Q08788']	3	hfacces_chia_sdrc	adhesion_chitinase-production	2	2026715	Bdellovibrionaceae bacterium
GCA_002716245.1	16	['HfsD|Q9A5L5', 'Foo1|A1X158', 'HfsG|Q9A5M0', 'HfsE|Q9A5M2', 'HfsH|Q9A5L9', 'OmpU|P0C6Q6', 'sdrC|A0A6A8FED6', 'ompA|A0A3B6XXR4', 'yfiB|Q9I4L6', 'ompW|A0A0F4PBB9', 'sipW|P54506', 'ChiA|P32823', 'HfsC|Q9A5L8', 'HfaB|P27343', 'HfsA|Q9A5L6', 'SRFAD|Q08788']	5	hfacces_foo_chia_ompu_sdrc	adhesion_chitinase-production	2	1872427	Alcanivorax sp.
GCA_002715685.1	14	['HfsD|Q9A5L5', 'OmpU|P0C6Q6', 'HfsF|Q9A5M1', 'HfsG|Q9A5M0', 'sdrC|A0A6A8FED6', 'ompA|A0A3B6XXR4', 'yfiB|Q9I4L6', 'ompW|A0A0F4PBB9', 'sipW|P54506', 'ChiA|P32823', 'HfsC|Q9A5L8', 'HfaB|P27343', 'HfsA|Q9A5L6', 'SRFAD|Q08788']	4	hfacces_chia_ompu_sdrc	adhesion_chitinase-production	2	1872427	Alcanivorax sp.
GCA_004127935.1	17	['HfsD|Q9A5L5', 'Foo1|A1X158', 'HfsF|Q9A5M1', 'HfsH|Q9A5L9', 'HfsG|Q9A5M0', 'tpbB|A0A0H2Z7X0', 'tasA|P54507', 'sdrC|A0A6A8FED6', 'ompA|A0A3B6XXR4', 'yfiB|Q9I4L6', 'sipW|P54506', 'RbmC|A0A2S1ZSI6', 'ChiA|P32823', 'HfsC|Q9A5L8', 'HfsA|Q9A5L6', 'Bap1|Q9KQW0', 'SRFAD|Q08788']	6	foo_chia_tapA_sdrc_bap1_rbmc	adhesion_chitinase-production	2	2212476	Fictibacillus sp. S7
GCA_003570715.1	14	['SRFAA|P27206', 'SRFAB|Q04747', 'HfsD|Q9A5L5', 'OmpU|P0C6Q6', 'HfsF|Q9A5M1', 'HfsG|Q9A5M0', 'HfsH|Q9A5L9', 'SRFAC|Q08787', 'yfiB|Q9I4L6', 'ompW|A0A0F4PBB9', 'sipW|P54506', 'HfaB|P27343', 'HfsA|Q9A5L6', 'SRFAD|Q08788']	3	srf_hfacces_ompu	drag-reducing_adhesion	2	2306023	Gemmobacter lutimaris
GCA_002703065.1	9	['SRFAA|P27206', 'SRFAB|Q04747', 'HfsD|Q9A5L5', 'HfsF|Q9A5M1', 'HfsG|Q9A5M0', 'sdrC|A0A6A8FED6', 'ompA|A0A3B6XXR4', 'sipW|P54506', 'ChiA|P32823']	2	chia_sdrc	chitinase-production_adhesion	2	1871037	Flavobacteriaceae bacterium
GCA_002725875.1	11	['HfsD|Q9A5L5', 'HfsF|Q9A5M1', 'HfsE|Q9A5M2', 'HfsH|Q9A5L9', 'HfsG|Q9A5M0', 'sdrC|A0A6A8FED6', 'ompA|A0A3B6XXR4', 'yfiB|Q9I4L6', 'sipW|P54506', 'ChiA|P32823', 'SRFAD|Q08788']	2	chia_sdrc	chitinase-production_adhesion	2	2026735	Deltaproteobacteria bacterium
GCA_002705565.1	11	['HfsD|Q9A5L5', 'HfsF|Q9A5M1', 'HfsH|Q9A5L9', 'HfsG|Q9A5M0', 'sdrC|A0A6A8FED6', 'yfiB|Q9I4L6', 'sipW|P54506', 'ChiA|P32823', 'HfsC|Q9A5L8', 'HfsA|Q9A5L6', 'SRFAD|Q08788']	2	chia_sdrc	chitinase-production_adhesion	2	2024832	Geminicoccus sp.
GCA_002737025.1	17	['HfsD|Q9A5L5', 'OmpU|P0C6Q6', 'HfsF|Q9A5M1', 'HfsH|Q9A5L9', 'HfsG|Q9A5M0', 'tpbB|A0A0H2Z7X0', 'ompA|A0A3B6XXR4', 'yfiB|Q9I4L6', 'ompW|A0A0F4PBB9', 'GbpA|C3LW75', 'sipW|P54506', 'ChiA|P32823', 'HfsC|Q9A5L8', 'yfiR|Q9I4L4', 'HfaB|P27343', 'HfsA|Q9A5L6', 'SRFAD|Q08788']	5	hfacces_chia_yfi_ompu_gbpa	adhesion_chitinase-production	2	29497	Vibrio splendidus
GCA_009903685.1	16	['HfsD|Q9A5L5', 'Foo1|A1X158', 'HfsF|Q9A5M1', 'HfsG|Q9A5M0', 'sdrC|A0A6A8FED6', 'tpbB|A0A0H2Z7X0', 'ompA|A0A3B6XXR4', 'yfiB|Q9I4L6', 'ompW|A0A0F4PBB9', 'sipW|P54506', 'RbmC|A0A2S1ZSI6', 'ChiA|P32823', 'HfsC|Q9A5L8', 'HfsA|Q9A5L6', 'Bap1|Q9KQW0', 'SRFAD|Q08788']	5	foo_chia_sdrc_bap1_rbmc	adhesion_chitinase-production	2	2696472	Muricauda ochracea
GCA_002716625.1	13	['HfsD|Q9A5L5', 'HfsF|Q9A5M1', 'HfsE|Q9A5M2', 'HfsH|Q9A5L9', 'HfsG|Q9A5M0', 'tpbB|A0A0H2Z7X0', 'sdrC|A0A6A8FED6', 'ompA|A0A3B6XXR4', 'yfiB|Q9I4L6', 'sipW|P54506', 'ChiA|P32823', 'HfsC|Q9A5L8', 'HfsA|Q9A5L6']	3	hfs_chia_sdrc	adhesion_chitinase-production	2	2026777	Phycisphaeraceae bacterium
GCA_002683025.1	15	['HfsD|Q9A5L5', 'Foo1|A1X158', 'HfsG|Q9A5M0', 'HfsH|Q9A5L9', 'OmpU|P0C6Q6', 'sdrC|A0A6A8FED6', 'ompA|A0A3B6XXR4', 'yfiB|Q9I4L6', 'ompW|A0A0F4PBB9', 'sipW|P54506', 'ChiA|P32823', 'HfsC|Q9A5L8', 'HfaB|P27343', 'HfsA|Q9A5L6', 'SRFAD|Q08788']	5	hfacces_foo_chia_ompu_sdrc	adhesion_chitinase-production	2	1872427	Alcanivorax sp.
GCA_002721975.1	9	['Foo1|A1X158', 'HfsF|Q9A5M1', 'HfsG|Q9A5M0', 'ompA|A0A3B6XXR4', 'yfiB|Q9I4L6', 'RbmC|A0A2S1ZSI6', 'ChiA|P32823', 'Bap1|Q9KQW0', 'pilF|A0A290TXQ9']	4	foo_chia_bap1_rbmc	adhesion_chitinase-production	2	2026809	Epsilonproteobacteria bacterium
GCA_900107645.1	17	['HfsD|Q9A5L5', 'OmpU|P0C6Q6', 'HfsF|Q9A5M1', 'HfsE|Q9A5M2', 'HfsH|Q9A5L9', 'HfsG|Q9A5M0', 'tpbB|A0A0H2Z7X0', 'sdrC|A0A6A8FED6', 'ompA|A0A3B6XXR4', 'yfiB|Q9I4L6', 'sipW|P54506', 'RbmC|A0A2S1ZSI6', 'ChiA|P32823', 'HfsC|Q9A5L8', 'HfsA|Q9A5L6', 'Bap1|Q9KQW0', 'SRFAD|Q08788']	6	hfs_chia_ompu_sdrc_bap1_rbmc	adhesion_chitinase-production	2	37625	Desulfuromusa kysingii
GCA_900156525.1	14	['SRFAA|P27206', 'SRFAB|Q04747', 'HfsD|Q9A5L5', 'OmpU|P0C6Q6', 'HfsG|Q9A5M0', 'sdrC|A0A6A8FED6', 'tasA|P54507', 'SRFAC|Q08787', 'yfiB|Q9I4L6', 'sipW|P54506', 'RbmC|A0A2S1ZSI6', 'HfsA|Q9A5L6', 'Bap1|Q9KQW0', 'SRFAD|Q08788']	6	srf_tapA_ompu_sdrc_bap1_rbmc	drag-reducing_adhesion	2	515897	Pontibaca methylaminivorans
GCA_900130015.1	17	['SRFAA|P27206', 'SRFAB|Q04747', 'HfsD|Q9A5L5', 'OmpU|P0C6Q6', 'HfsF|Q9A5M1', 'HfsE|Q9A5M2', 'HfsG|Q9A5M0', 'HfsH|Q9A5L9', 'yfiB|Q9I4L6', 'sipW|P54506', 'RbmC|A0A2S1ZSI6', 'ChiA|P32823', 'HfsC|Q9A5L8', 'HfaB|P27343', 'HfsA|Q9A5L6', 'Bap1|Q9KQW0', 'SRFAD|Q08788']	6	hfs_hfacces_chia_ompu_bap1_rbmc	adhesion_chitinase-production	2	1121409	Desulfofustis glycolicus
GCA_014076905.1	18	['HfsD|Q9A5L5', 'Foo1|A1X158', 'HfsF|Q9A5M1', 'HfsH|Q9A5L9', 'HfsG|Q9A5M0', 'OmpU|P0C6Q6', 'sdrC|A0A6A8FED6', 'yfiB|Q9I4L6', 'ompW|A0A0F4PBB9', 'GbpA|C3LW75', 'pilF|A0A290TXQ9', 'sipW|P54506', 'ChiA|P32823', 'HfsC|Q9A5L8', 'yfiR|Q9I4L4', 'HfaB|P27343', 'HfsA|Q9A5L6', 'SRFAD|Q08788']	6	hfacces_foo_chia_ompu_sdrc_gbpa	adhesion_chitinase-production	2	2759814	Colwellia sp. MB02u-7
GCA_013423925.1	17	['HfsD|Q9A5L5', 'Foo1|A1X158', 'HfsG|Q9A5M0', 'HfsH|Q9A5L9', 'OmpU|P0C6Q6', 'sdrC|A0A6A8FED6', 'ompA|A0A3B6XXR4', 'yfiB|Q9I4L6', 'ompW|A0A0F4PBB9', 'GbpA|C3LW75', 'sipW|P54506', 'ChiA|P32823', 'HfsC|Q9A5L8', 'yfiR|Q9I4L4', 'HfaB|P27343', 'HfsA|Q9A5L6', 'SRFAD|Q08788']	6	hfacces_foo_chia_ompu_sdrc_gbpa	adhesion_chitinase-production	2	2752475	Pseudoalteromonas sp. JSTW
GCA_002731055.1	10	['HfsF|Q9A5M1', 'HfsE|Q9A5M2', 'HfsG|Q9A5M0', 'tpbB|A0A0H2Z7X0', 'sipW|P54506', 'RbmC|A0A2S1ZSI6', 'ChiA|P32823', 'HfsC|Q9A5L8', 'Bap1|Q9KQW0', 'pilF|A0A290TXQ9']	3	chia_bap1_rbmc	chitinase-production_adhesion	2	2026760	Candidatus Marinimicrobia bacterium
GCA_000808615.1	18	['SRFAA|P27206', 'SRFAB|Q04747', 'HfsD|Q9A5L5', 'OmpU|P0C6Q6', 'HfsG|Q9A5M0', 'HfsE|Q9A5M2', 'HfsH|Q9A5L9', 'tpbB|A0A0H2Z7X0', 'ompA|A0A3B6XXR4', 'yfiB|Q9I4L6', 'sipW|P54506', 'RbmC|A0A2S1ZSI6', 'ChiA|P32823', 'HfsC|Q9A5L8', 'HfaB|P27343', 'HfsA|Q9A5L6', 'Bap1|Q9KQW0', 'SRFAD|Q08788']	5	hfacces_chia_ompu_bap1_rbmc	adhesion_chitinase-production	2	658445	Photobacterium gaetbulicola
GCA_012272835.1	15	['HfsD|Q9A5L5', 'Foo1|A1X158', 'HfsF|Q9A5M1', 'HfsE|Q9A5M2', 'HfsG|Q9A5M0', 'OmpU|P0C6Q6', 'sdrC|A0A6A8FED6', 'ompA|A0A3B6XXR4', 'yfiB|Q9I4L6', 'sipW|P54506', 'ChiA|P32823', 'HfsC|Q9A5L8', 'yfiR|Q9I4L4', 'HfsA|Q9A5L6', 'SRFAD|Q08788']	4	foo_chia_ompu_sdrc	adhesion_chitinase-production	2	2721624	Spongiibacter thalassae
GCA_015355815.1	14	['HfsD|Q9A5L5', 'OmpU|P0C6Q6', 'HfsG|Q9A5M0', 'HfsE|Q9A5M2', 'HfsH|Q9A5L9', 'tpbB|A0A0H2Z7X0', 'sdrC|A0A6A8FED6', 'yfiB|Q9I4L6', 'sipW|P54506', 'ChiA|P32823', 'HfsC|Q9A5L8', 'HfaB|P27343', 'HfsA|Q9A5L6', 'SRFAD|Q08788']	4	hfacces_chia_ompu_sdrc	adhesion_chitinase-production	2	1419947	Nonlabens mediterrranea
GCA_002730115.1	10	['HfsD|Q9A5L5', 'HfsF|Q9A5M1', 'HfsH|Q9A5L9', 'HfsG|Q9A5M0', 'tpbB|A0A0H2Z7X0', 'sdrC|A0A6A8FED6', 'yfiB|Q9I4L6', 'ChiA|P32823', 'HfsC|Q9A5L8', 'SRFAD|Q08788']	2	chia_sdrc	chitinase-production_adhesion	2	2026742	Gemmatimonadetes bacterium
GCA_014163745.1	19	['Foo1|A1X158', 'ompA|A0A3B6XXR4', 'HfaB|P27343', 'OmpU|P0C6Q6', 'tpbB|A0A0H2Z7X0', 'ompW|A0A0F4PBB9', 'HfsD|Q9A5L5', 'HfsF|Q9A5M1', 'HfsE|Q9A5M2', 'HfsH|Q9A5L9', 'HfsG|Q9A5M0', 'yfiB|Q9I4L6', 'sipW|P54506', 'ChiA|P32823', 'HfsC|Q9A5L8', 'yfiR|Q9I4L4', 'HfsA|Q9A5L6', 'GbpA|C3LW75', 'SRFAD|Q08788']	7	hfs_hfacces_foo_chia_yfi_ompu_gbpa	adhesion_chitinase-production	2	2760937	Pseudoalteromonas sp. SR44-2
GCA_900106635.1	13	['SRFAA|P27206', 'SRFAB|Q04747', 'HfsD|Q9A5L5', 'OmpU|P0C6Q6', 'HfsG|Q9A5M0', 'HfsH|Q9A5L9', 'tpbB|A0A0H2Z7X0', 'yfiB|Q9I4L6', 'ompW|A0A0F4PBB9', 'sipW|P54506', 'ChiA|P32823', 'HfsA|Q9A5L6', 'SRFAD|Q08788']	2	chia_ompu	chitinase-production_adhesion	2	379347	Tritonibacter mobilis
GCA_001579905.1	15	['SRFAA|P27206', 'SRFAB|Q04747', 'HfsD|Q9A5L5', 'Foo1|A1X158', 'HfsF|Q9A5M1', 'HfsE|Q9A5M2', 'HfsG|Q9A5M0', 'HfsH|Q9A5L9', 'tpbB|A0A0H2Z7X0', 'SRFAC|Q08787', 'yfiB|Q9I4L6', 'sipW|P54506', 'HfsC|Q9A5L8', 'HfsA|Q9A5L6', 'SRFAD|Q08788']	3	srf_hfs_foo	drag-reducing_adhesion	2	1674922	Labrenzia sp. CP4
GCA_000737575.1	12	['HfsD|Q9A5L5', 'HfsF|Q9A5M1', 'HfsG|Q9A5M0', 'ompA|A0A3B6XXR4', 'tpbB|A0A0H2Z7X0', 'sipW|P54506', 'RbmC|A0A2S1ZSI6', 'ChiA|P32823', 'HfsC|Q9A5L8', 'HfsA|Q9A5L6', 'Bap1|Q9KQW0', 'SRFAD|Q08788']	3	chia_bap1_rbmc	chitinase-production_adhesion	2	585423	Synechococcus sp. KORDI-49
GCA_012395255.1	18	['SRFAA|P27206', 'SRFAB|Q04747', 'HfsD|Q9A5L5', 'OmpU|P0C6Q6', 'HfsF|Q9A5M1', 'HfsE|Q9A5M2', 'HfsG|Q9A5M0', 'HfsH|Q9A5L9', 'sdrC|A0A6A8FED6', 'ompA|A0A3B6XXR4', 'SRFAC|Q08787', 'yfiB|Q9I4L6', 'ompW|A0A0F4PBB9', 'sipW|P54506', 'RbmC|A0A2S1ZSI6', 'HfsC|Q9A5L8', 'Bap1|Q9KQW0', 'SRFAD|Q08788']	5	srf_ompu_sdrc_bap1_rbmc	drag-reducing_adhesion	2	1665687	Oleiagrimonas citrea
GCA_900100795.1	17	['SRFAA|P27206', 'SRFAB|Q04747', 'HfsD|Q9A5L5', 'HfsF|Q9A5M1', 'HfsE|Q9A5M2', 'HfsG|Q9A5M0', 'HfsH|Q9A5L9', 'ompA|A0A3B6XXR4', 'SRFAC|Q08787', 'yfiB|Q9I4L6', 'ompW|A0A0F4PBB9', 'GbpA|C3LW75', 'sipW|P54506', 'HfsC|Q9A5L8', 'HfaB|P27343', 'HfsA|Q9A5L6', 'SRFAD|Q08788']	4	srf_hfs_hfacces_gbpa	drag-reducing_adhesion	2	89065	Pseudomonas abietaniphila
GCA_900141955.1	15	['HfsD|Q9A5L5', 'HfsF|Q9A5M1', 'HfsE|Q9A5M2', 'HfsH|Q9A5L9', 'HfsG|Q9A5M0', 'tpbB|A0A0H2Z7X0', 'sdrC|A0A6A8FED6', 'ompA|A0A3B6XXR4', 'yfiB|Q9I4L6', 'ompW|A0A0F4PBB9', 'sipW|P54506', 'ChiA|P32823', 'HfsC|Q9A5L8', 'HfsA|Q9A5L6', 'SRFAD|Q08788']	3	hfs_chia_sdrc	adhesion_chitinase-production	2	797419	Aequorivita viscosa
GCA_002693405.1	12	['HfsD|Q9A5L5', 'OmpU|P0C6Q6', 'HfsF|Q9A5M1', 'HfsE|Q9A5M2', 'HfsH|Q9A5L9', 'HfsG|Q9A5M0', 'yfiB|Q9I4L6', 'sipW|P54506', 'ChiA|P32823', 'HfsC|Q9A5L8', 'HfsA|Q9A5L6', 'SRFAD|Q08788']	3	hfs_chia_ompu	adhesion_chitinase-production	2	267	Paracoccus sp.
GCA_003258595.1	12	['HfsD|Q9A5L5', 'HfsF|Q9A5M1', 'HfsE|Q9A5M2', 'HfsH|Q9A5L9', 'HfsG|Q9A5M0', 'tpbB|A0A0H2Z7X0', 'yfiB|Q9I4L6', 'sipW|P54506', 'ChiA|P32823', 'HfsC|Q9A5L8', 'HfsA|Q9A5L6', 'SRFAD|Q08788']	2	hfs_chia	adhesion_chitinase-production	2	2184697	Acuticoccus sediminis
GCA_002382885.1	23	['SRFAB|Q04747', 'CHPC|Q9AD93', 'ompA|A0A3B6XXR4', 'CHPE|Q9X9Z2', 'SRFAA|P27206', 'CHPG|Q9KYH3', 'CHPA|Q8CJY7', 'HfsD|Q9A5L5', 'HfsF|Q9A5M1', 'HfsE|Q9A5M2', 'HfsG|Q9A5M0', 'HfsH|Q9A5L9', 'SRFAC|Q08787', 'yfiB|Q9I4L6', 'CHPF|Q9KYG7', 'CHPH|Q9AD92', 'sipW|P54506', 'HfsC|Q9A5L8', 'CHPB|Q9X7U2', 'sdrC|A0A6A8FED6', 'CHPD|Q9L1J9', 'GbpA|C3LW75', 'SRFAD|Q08788']	4	srf_chp_sdrc_gbpa	drag-reducing_adhesion	2	2023771	Streptomyces sp. WZ.A104
GCA_002726345.1	15	['HfsD|Q9A5L5', 'OmpU|P0C6Q6', 'HfsF|Q9A5M1', 'HfsH|Q9A5L9', 'HfsG|Q9A5M0', 'ompA|A0A3B6XXR4', 'yfiB|Q9I4L6', 'ompW|A0A0F4PBB9', 'sipW|P54506', 'RbmC|A0A2S1ZSI6', 'ChiA|P32823', 'HfaB|P27343', 'HfsA|Q9A5L6', 'Bap1|Q9KQW0', 'SRFAD|Q08788']	5	hfacces_chia_ompu_bap1_rbmc	adhesion_chitinase-production	2	1874361	Idiomarina sp.
GCA_002713645.1	7	['HfsD|Q9A5L5', 'HfsG|Q9A5M0', 'HfsE|Q9A5M2', 'sdrC|A0A6A8FED6', 'yfiB|Q9I4L6', 'ChiA|P32823', 'HfsA|Q9A5L6']	2	chia_sdrc	chitinase-production_adhesion	2	1871037	Flavobacteriaceae bacterium
GCA_002631205.1	18	['SRFAA|P27206', 'SRFAB|Q04747', 'HfsD|Q9A5L5', 'HfsF|Q9A5M1', 'HfsE|Q9A5M2', 'HfsG|Q9A5M0', 'HfsH|Q9A5L9', 'tpbB|A0A0H2Z7X0', 'sdrC|A0A6A8FED6', 'ompA|A0A3B6XXR4', 'yfiB|Q9I4L6', 'sipW|P54506', 'RbmC|A0A2S1ZSI6', 'ChiA|P32823', 'HfsC|Q9A5L8', 'HfsA|Q9A5L6', 'Bap1|Q9KQW0', 'SRFAD|Q08788']	5	hfs_chia_sdrc_bap1_rbmc	adhesion_chitinase-production	2	438751	Lewinella marina
GCA_003231495.1	19	['SRFAB|Q04747', 'HfaB|P27343', 'SRFAA|P27206', 'OmpU|P0C6Q6', 'tpbB|A0A0H2Z7X0', 'RbmC|A0A2S1ZSI6', 'Bap1|Q9KQW0', 'HfsD|Q9A5L5', 'HfsF|Q9A5M1', 'HfsE|Q9A5M2', 'HfsG|Q9A5M0', 'HfsH|Q9A5L9', 'SRFAC|Q08787', 'yfiB|Q9I4L6', 'sipW|P54506', 'HfsC|Q9A5L8', 'HfsA|Q9A5L6', 'sdrC|A0A6A8FED6', 'SRFAD|Q08788']	7	srf_hfs_hfacces_ompu_sdrc_bap1_rbmc	drag-reducing_adhesion	2	1764569	Acaryochloris thomasi
GCA_003987315.1	16	['HfsD|Q9A5L5', 'OmpU|P0C6Q6', 'HfsF|Q9A5M1', 'HfsH|Q9A5L9', 'HfsG|Q9A5M0', 'ompA|A0A3B6XXR4', 'yfiB|Q9I4L6', 'ompW|A0A0F4PBB9', 'sipW|P54506', 'RbmC|A0A2S1ZSI6', 'ChiA|P32823', 'yfiR|Q9I4L4', 'HfaB|P27343', 'HfsA|Q9A5L6', 'Bap1|Q9KQW0', 'SRFAD|Q08788']	5	hfacces_chia_ompu_bap1_rbmc	adhesion_chitinase-production	2	859059	Aliidiomarina haloalkalitolerans
GCA_006546625.1	16	['HfsD|Q9A5L5', 'Foo1|A1X158', 'HfsG|Q9A5M0', 'HfsE|Q9A5M2', 'HfsH|Q9A5L9', 'sdrC|A0A6A8FED6', 'ompA|A0A3B6XXR4', 'yfiB|Q9I4L6', 'sipW|P54506', 'RbmC|A0A2S1ZSI6', 'ChiA|P32823', 'HfsC|Q9A5L8', 'HfaB|P27343', 'HfsA|Q9A5L6', 'Bap1|Q9KQW0', 'SRFAD|Q08788']	6	hfacces_foo_chia_sdrc_bap1_rbmc	adhesion_chitinase-production	2	2576776	Haloflavibacter putidus
GCA_002875525.1	18	['HfsD|Q9A5L5', 'OmpU|P0C6Q6', 'HfsG|Q9A5M0', 'HfsH|Q9A5L9', 'ompA|A0A3B6XXR4', 'tpbB|A0A0H2Z7X0', 'yfiB|Q9I4L6', 'ompW|A0A0F4PBB9', 'GbpA|C3LW75', 'sipW|P54506', 'RbmC|A0A2S1ZSI6', 'ChiA|P32823', 'HfsC|Q9A5L8', 'yfiR|Q9I4L4', 'HfaB|P27343', 'HfsA|Q9A5L6', 'Bap1|Q9KQW0', 'SRFAD|Q08788']	7	hfacces_chia_yfi_ompu_bap1_rbmc_gbpa	adhesion_chitinase-production	2	1884470	Vibrio sp. 10N.222.55.C12
GCA_002873035.1	17	['HfsD|Q9A5L5', 'OmpU|P0C6Q6', 'HfsF|Q9A5M1', 'HfsE|Q9A5M2', 'HfsH|Q9A5L9', 'HfsG|Q9A5M0', 'sdrC|A0A6A8FED6', 'ompA|A0A3B6XXR4', 'yfiB|Q9I4L6', 'GbpA|C3LW75', 'sipW|P54506', 'ChiA|P32823', 'HfsC|Q9A5L8', 'yfiR|Q9I4L4', 'HfaB|P27343', 'HfsA|Q9A5L6', 'SRFAD|Q08788']	6	hfs_hfacces_chia_ompu_sdrc_gbpa	adhesion_chitinase-production	2	188144	Enterovibrio norvegicus
GCA_002701785.1	14	['HfsD|Q9A5L5', 'Foo1|A1X158', 'HfsF|Q9A5M1', 'HfsE|Q9A5M2', 'HfsG|Q9A5M0', 'sdrC|A0A6A8FED6', 'ompA|A0A3B6XXR4', 'yfiB|Q9I4L6', 'sipW|P54506', 'ChiA|P32823', 'HfsC|Q9A5L8', 'HfaB|P27343', 'HfsA|Q9A5L6', 'SRFAD|Q08788']	4	hfacces_foo_chia_sdrc	adhesion_chitinase-production	2	2026760	Candidatus Marinimicrobia bacterium
GCA_014163675.1	21	['Foo1|A1X158', 'ompA|A0A3B6XXR4', 'HfaB|P27343', 'OmpU|P0C6Q6', 'ompW|A0A0F4PBB9', 'RbmC|A0A2S1ZSI6', 'Bap1|Q9KQW0', 'pilF|A0A290TXQ9', 'HfsD|Q9A5L5', 'HfsF|Q9A5M1', 'HfsH|Q9A5L9', 'HfsG|Q9A5M0', 'yfiB|Q9I4L6', 'sipW|P54506', 'ChiA|P32823', 'HfsC|Q9A5L8', 'yfiR|Q9I4L4', 'HfsA|Q9A5L6', 'sdrC|A0A6A8FED6', 'GbpA|C3LW75', 'SRFAD|Q08788']	9	hfacces_foo_chia_omp_ompu_sdrc_bap1_rbmc_gbpa	adhesion_chitinase-production	2	2760934	Pseudoalteromonas sp. SR44-5
GCA_002879675.3	24	['SRFAB|Q04747', 'CHPC|Q9AD93', 'Foo1|A1X158', 'ompA|A0A3B6XXR4', 'CHPE|Q9X9Z2', 'SRFAA|P27206', 'CHPG|Q9KYH3', 'CHPA|Q8CJY7', 'HfsD|Q9A5L5', 'HfsF|Q9A5M1', 'HfsE|Q9A5M2', 'HfsG|Q9A5M0', 'HfsH|Q9A5L9', 'SRFAC|Q08787', 'yfiB|Q9I4L6', 'CHPF|Q9KYG7', 'CHPH|Q9AD92', 'sipW|P54506', 'HfsC|Q9A5L8', 'HfsA|Q9A5L6', 'CHPB|Q9X7U2', 'CHPD|Q9L1J9', 'GbpA|C3LW75', 'SRFAD|Q08788']	5	srf_hfs_chp_foo_gbpa	drag-reducing_adhesion	2	2069440	Streptomyces sp. SMS_SU21
GCA_002693845.1	14	['OmpU|P0C6Q6', 'HfsF|Q9A5M1', 'HfsG|Q9A5M0', 'sdrC|A0A6A8FED6', 'ompA|A0A3B6XXR4', 'yfiB|Q9I4L6', 'ompW|A0A0F4PBB9', 'sipW|P54506', 'RbmC|A0A2S1ZSI6', 'ChiA|P32823', 'HfsC|Q9A5L8', 'HfaB|P27343', 'Bap1|Q9KQW0', 'SRFAD|Q08788']	6	hfacces_chia_ompu_sdrc_bap1_rbmc	adhesion_chitinase-production	2	1872427	Alcanivorax sp.
GCA_002875545.1	19	['SRFAB|Q04747', 'ompA|A0A3B6XXR4', 'HfaB|P27343', 'SRFAA|P27206', 'OmpU|P0C6Q6', 'Bap1|Q9KQW0', 'HfsD|Q9A5L5', 'HfsF|Q9A5M1', 'HfsE|Q9A5M2', 'HfsG|Q9A5M0', 'HfsH|Q9A5L9', 'yfiB|Q9I4L6', 'sipW|P54506', 'ChiA|P32823', 'HfsC|Q9A5L8', 'yfiR|Q9I4L4', 'HfsA|Q9A5L6', 'GbpA|C3LW75', 'SRFAD|Q08788']	6	hfs_hfacces_chia_ompu_bap1_gbpa	adhesion_chitinase-production	2	188144	Enterovibrio norvegicus
GCA_002694065.1	15	['HfsD|Q9A5L5', 'Foo1|A1X158', 'HfsF|Q9A5M1', 'HfsH|Q9A5L9', 'HfsG|Q9A5M0', 'OmpU|P0C6Q6', 'tpbB|A0A0H2Z7X0', 'ompA|A0A3B6XXR4', 'yfiB|Q9I4L6', 'sipW|P54506', 'RbmC|A0A2S1ZSI6', 'ChiA|P32823', 'HfsC|Q9A5L8', 'Bap1|Q9KQW0', 'SRFAD|Q08788']	5	foo_chia_ompu_bap1_rbmc	adhesion_chitinase-production	2	1872107	Acidiferrobacter sp.
GCA_009363695.1	15	['HfsD|Q9A5L5', 'Foo1|A1X158', 'HfsF|Q9A5M1', 'HfsH|Q9A5L9', 'HfsG|Q9A5M0', 'ompA|A0A3B6XXR4', 'tasA|P54507', 'yfiB|Q9I4L6', 'sipW|P54506', 'RbmC|A0A2S1ZSI6', 'ChiA|P32823', 'HfsC|Q9A5L8', 'HfsA|Q9A5L6', 'Bap1|Q9KQW0', 'SRFAD|Q08788']	5	foo_chia_tapA_bap1_rbmc	adhesion_chitinase-production	2	2587848	Bacillus sp. THAF10
GCA_002699605.1	15	['Foo1|A1X158', 'OmpU|P0C6Q6', 'HfsF|Q9A5M1', 'HfsE|Q9A5M2', 'HfsG|Q9A5M0', 'tpbB|A0A0H2Z7X0', 'tasA|P54507', 'sdrC|A0A6A8FED6', 'ompA|A0A3B6XXR4', 'yfiB|Q9I4L6', 'sipW|P54506', 'ChiA|P32823', 'HfsC|Q9A5L8', 'HfsA|Q9A5L6', 'SRFAD|Q08788']	5	foo_chia_tapA_ompu_sdrc	adhesion_chitinase-production	2	192149	Muricauda sp.
GCA_002710745.1	8	['HfsD|Q9A5L5', 'OmpU|P0C6Q6', 'HfsF|Q9A5M1', 'HfsG|Q9A5M0', 'sipW|P54506', 'ChiA|P32823', 'HfsA|Q9A5L6', 'SRFAD|Q08788']	2	chia_ompu	chitinase-production_adhesion	2	2026782	Porticoccaceae bacterium
GCA_006517275.1	14	['SRFAA|P27206', 'SRFAB|Q04747', 'HfsD|Q9A5L5', 'HfsF|Q9A5M1', 'HfsE|Q9A5M2', 'HfsG|Q9A5M0', 'HfsH|Q9A5L9', 'SRFAC|Q08787', 'yfiB|Q9I4L6', 'sipW|P54506', 'HfsC|Q9A5L8', 'yfiR|Q9I4L4', 'HfsA|Q9A5L6', 'SRFAD|Q08788']	2	srf_hfs	drag-reducing_adhesion	2	2590016	Labrenzia sp. PHM005
GCA_002691215.1	19	['ompA|A0A3B6XXR4', 'HfaB|P27343', 'OmpU|P0C6Q6', 'tpbB|A0A0H2Z7X0', 'ompW|A0A0F4PBB9', 'RbmC|A0A2S1ZSI6', 'Bap1|Q9KQW0', 'pilF|A0A290TXQ9', 'HfsD|Q9A5L5', 'HfsF|Q9A5M1', 'HfsE|Q9A5M2', 'HfsH|Q9A5L9', 'HfsG|Q9A5M0', 'yfiB|Q9I4L6', 'sipW|P54506', 'ChiA|P32823', 'HfsC|Q9A5L8', 'HfsA|Q9A5L6', 'SRFAD|Q08788']	7	hfs_hfacces_chia_omp_ompu_bap1_rbmc	adhesion_chitinase-production	2	2020902	Ponticaulis sp.
GCA_001635365.1	20	['SRFAB|Q04747', 'Foo1|A1X158', 'ompA|A0A3B6XXR4', 'HfaB|P27343', 'SRFAA|P27206', 'OmpU|P0C6Q6', 'tpbB|A0A0H2Z7X0', 'ompW|A0A0F4PBB9', 'HfsD|Q9A5L5', 'HfsF|Q9A5M1', 'HfsE|Q9A5M2', 'HfsG|Q9A5M0', 'HfsH|Q9A5L9', 'yfiB|Q9I4L6', 'sipW|P54506', 'ChiA|P32823', 'HfsC|Q9A5L8', 'HfsA|Q9A5L6', 'sdrC|A0A6A8FED6', 'SRFAD|Q08788']	6	hfs_hfacces_foo_chia_ompu_sdrc	adhesion_chitinase-production	2	1822267	Oleiphilus sp. HI0128
GCA_001635315.1	20	['SRFAB|Q04747', 'Foo1|A1X158', 'ompA|A0A3B6XXR4', 'HfaB|P27343', 'SRFAA|P27206', 'OmpU|P0C6Q6', 'tpbB|A0A0H2Z7X0', 'ompW|A0A0F4PBB9', 'HfsD|Q9A5L5', 'HfsF|Q9A5M1', 'HfsE|Q9A5M2', 'HfsG|Q9A5M0', 'HfsH|Q9A5L9', 'yfiB|Q9I4L6', 'sipW|P54506', 'ChiA|P32823', 'HfsC|Q9A5L8', 'HfsA|Q9A5L6', 'sdrC|A0A6A8FED6', 'SRFAD|Q08788']	6	hfs_hfacces_foo_chia_ompu_sdrc	adhesion_chitinase-production	2	1822265	Oleiphilus sp. HI0123
GCA_002692205.1	13	['HfsD|Q9A5L5', 'HfsF|Q9A5M1', 'HfsE|Q9A5M2', 'HfsG|Q9A5M0', 'tpbB|A0A0H2Z7X0', 'ompA|A0A3B6XXR4', 'yfiB|Q9I4L6', 'sipW|P54506', 'RbmC|A0A2S1ZSI6', 'ChiA|P32823', 'HfsC|Q9A5L8', 'Bap1|Q9KQW0', 'SRFAD|Q08788']	3	chia_bap1_rbmc	chitinase-production_adhesion	2	2026754	Legionellales bacterium
GCA_002685395.1	18	['HfsD|Q9A5L5', 'Foo1|A1X158', 'HfsF|Q9A5M1', 'HfsE|Q9A5M2', 'HfsH|Q9A5L9', 'HfsG|Q9A5M0', 'OmpU|P0C6Q6', 'tpbB|A0A0H2Z7X0', 'sdrC|A0A6A8FED6', 'ompA|A0A3B6XXR4', 'yfiB|Q9I4L6', 'sipW|P54506', 'ChiA|P32823', 'HfsC|Q9A5L8', 'yfiR|Q9I4L4', 'HfaB|P27343', 'HfsA|Q9A5L6', 'SRFAD|Q08788']	7	hfs_hfacces_foo_chia_yfi_ompu_sdrc	adhesion_chitinase-production	2	1869214	Rheinheimera sp.
GCA_000808535.1	19	['ompA|A0A3B6XXR4', 'HfaB|P27343', 'OmpU|P0C6Q6', 'tpbB|A0A0H2Z7X0', 'RbmC|A0A2S1ZSI6', 'Bap1|Q9KQW0', 'HfsD|Q9A5L5', 'HfsF|Q9A5M1', 'HfsE|Q9A5M2', 'HfsG|Q9A5M0', 'yfiB|Q9I4L6', 'sipW|P54506', 'ChiA|P32823', 'HfsC|Q9A5L8', 'yfiR|Q9I4L4', 'HfsA|Q9A5L6', 'sdrC|A0A6A8FED6', 'GbpA|C3LW75', 'SRFAD|Q08788']	8	hfacces_chia_yfi_ompu_sdrc_bap1_rbmc_gbpa	adhesion_chitinase-production	2	379097	Vibrio sinaloensis
GCA_001634945.1	20	['SRFAB|Q04747', 'Foo1|A1X158', 'ompA|A0A3B6XXR4', 'HfaB|P27343', 'SRFAA|P27206', 'OmpU|P0C6Q6', 'ompW|A0A0F4PBB9', 'RbmC|A0A2S1ZSI6', 'Bap1|Q9KQW0', 'HfsD|Q9A5L5', 'HfsF|Q9A5M1', 'HfsG|Q9A5M0', 'HfsH|Q9A5L9', 'yfiB|Q9I4L6', 'sipW|P54506', 'ChiA|P32823', 'HfsC|Q9A5L8', 'HfsA|Q9A5L6', 'sdrC|A0A6A8FED6', 'SRFAD|Q08788']	7	hfacces_foo_chia_ompu_sdrc_bap1_rbmc	adhesion_chitinase-production	2	1822234	Alcanivorax sp. HI0044
GCA_002719955.1	14	['HfsD|Q9A5L5', 'OmpU|P0C6Q6', 'HfsG|Q9A5M0', 'HfsE|Q9A5M2', 'HfsH|Q9A5L9', 'sdrC|A0A6A8FED6', 'yfiB|Q9I4L6', 'sipW|P54506', 'ChiA|P32823', 'HfsC|Q9A5L8', 'yfiR|Q9I4L4', 'HfaB|P27343', 'HfsA|Q9A5L6', 'SRFAD|Q08788']	4	hfacces_chia_ompu_sdrc	adhesion_chitinase-production	2	2026735	Deltaproteobacteria bacterium
GCA_013177675.1	14	['HfsD|Q9A5L5', 'OmpU|P0C6Q6', 'HfsF|Q9A5M1', 'HfsH|Q9A5L9', 'HfsG|Q9A5M0', 'tpbB|A0A0H2Z7X0', 'ompA|A0A3B6XXR4', 'yfiB|Q9I4L6', 'sipW|P54506', 'RbmC|A0A2S1ZSI6', 'ChiA|P32823', 'HfsC|Q9A5L8', 'HfsA|Q9A5L6', 'Bap1|Q9KQW0']	4	chia_ompu_bap1_rbmc	chitinase-production_adhesion	2	1849015	Arcobacter acticola
GCA_000836695.1	20	['SRFAB|Q04747', 'CHPC|Q9AD93', 'CHPE|Q9X9Z2', 'SRFAA|P27206', 'OmpU|P0C6Q6', 'CHPG|Q9KYH3', 'CHPA|Q8CJY7', 'HfsD|Q9A5L5', 'HfsF|Q9A5M1', 'HfsG|Q9A5M0', 'HfsH|Q9A5L9', 'yfiB|Q9I4L6', 'CHPF|Q9KYG7', 'CHPH|Q9AD92', 'sipW|P54506', 'HfsC|Q9A5L8', 'HfsA|Q9A5L6', 'CHPB|Q9X7U2', 'CHPD|Q9L1J9', 'SRFAD|Q08788']	2	chp_ompu	drag-reducing_adhesion	2	1123501	Wenxinia marina
GCA_002728225.1	12	['SRFAA|P27206', 'SRFAB|Q04747', 'OmpU|P0C6Q6', 'HfsG|Q9A5M0', 'HfsH|Q9A5L9', 'sdrC|A0A6A8FED6', 'ompA|A0A3B6XXR4', 'SRFAC|Q08787', 'yfiB|Q9I4L6', 'sipW|P54506', 'ChiA|P32823', 'HfsC|Q9A5L8']	3	chia_ompu_sdrc	chitinase-production_adhesion	2	2026801	Verrucomicrobiales bacterium
GCA_014077325.1	19	['Foo1|A1X158', 'ompA|A0A3B6XXR4', 'HfaB|P27343', 'OmpU|P0C6Q6', 'tpbB|A0A0H2Z7X0', 'ompW|A0A0F4PBB9', 'pilF|A0A290TXQ9', 'HfsD|Q9A5L5', 'HfsF|Q9A5M1', 'HfsH|Q9A5L9', 'HfsG|Q9A5M0', 'yfiB|Q9I4L6', 'sipW|P54506', 'ChiA|P32823', 'HfsC|Q9A5L8', 'yfiR|Q9I4L4', 'HfsA|Q9A5L6', 'sdrC|A0A6A8FED6', 'SRFAD|Q08788']	7	hfacces_foo_chia_omp_yfi_ompu_sdrc	adhesion_chitinase-production	2	2759835	Colwellia sp. BRX8-5
GCA_014077545.1	18	['HfsD|Q9A5L5', 'Foo1|A1X158', 'HfsG|Q9A5M0', 'HfsH|Q9A5L9', 'OmpU|P0C6Q6', 'tpbB|A0A0H2Z7X0', 'sdrC|A0A6A8FED6', 'ompA|A0A3B6XXR4', 'yfiB|Q9I4L6', 'ompW|A0A0F4PBB9', 'pilF|A0A290TXQ9', 'sipW|P54506', 'ChiA|P32823', 'HfsC|Q9A5L8', 'yfiR|Q9I4L4', 'HfaB|P27343', 'HfsA|Q9A5L6', 'SRFAD|Q08788']	7	hfacces_foo_chia_omp_yfi_ompu_sdrc	adhesion_chitinase-production	2	2759846	Colwellia sp. BRX10-1
GCA_001304315.1	14	['HfsD|Q9A5L5', 'HfsF|Q9A5M1', 'HfsE|Q9A5M2', 'HfsG|Q9A5M0', 'tpbB|A0A0H2Z7X0', 'yfiB|Q9I4L6', 'ompW|A0A0F4PBB9', 'sipW|P54506', 'RbmC|A0A2S1ZSI6', 'ChiA|P32823', 'HfsC|Q9A5L8', 'HfaB|P27343', 'HfsA|Q9A5L6', 'Bap1|Q9KQW0']	4	hfacces_chia_bap1_rbmc	adhesion_chitinase-production	2	1703426	candidate division Zixibacteria bacterium SM23_73_2
GCA_007860045.1	17	['SRFAA|P27206', 'SRFAB|Q04747', 'HfsD|Q9A5L5', 'HfsF|Q9A5M1', 'HfsE|Q9A5M2', 'HfsG|Q9A5M0', 'HfsH|Q9A5L9', 'ompA|A0A3B6XXR4', 'SRFAC|Q08787', 'yfiB|Q9I4L6', 'sipW|P54506', 'RbmC|A0A2S1ZSI6', 'HfsC|Q9A5L8', 'HfaB|P27343', 'HfsA|Q9A5L6', 'Bap1|Q9KQW0', 'SRFAD|Q08788']	5	srf_hfs_hfacces_bap1_rbmc	drag-reducing_adhesion	2	2528005	Stieleria varia
GCA_002693765.1	17	['HfsD|Q9A5L5', 'Foo1|A1X158', 'HfsG|Q9A5M0', 'HfsE|Q9A5M2', 'HfsH|Q9A5L9', 'OmpU|P0C6Q6', 'tpbB|A0A0H2Z7X0', 'sdrC|A0A6A8FED6', 'ompA|A0A3B6XXR4', 'yfiB|Q9I4L6', 'ompW|A0A0F4PBB9', 'pilF|A0A290TXQ9', 'sipW|P54506', 'ChiA|P32823', 'HfsC|Q9A5L8', 'HfsA|Q9A5L6', 'SRFAD|Q08788']	5	foo_chia_omp_ompu_sdrc	adhesion_chitinase-production	2	232	Alteromonas sp.
GCA_007859715.1	14	['HfsD|Q9A5L5', 'Foo1|A1X158', 'HfsF|Q9A5M1', 'HfsE|Q9A5M2', 'HfsH|Q9A5L9', 'HfsG|Q9A5M0', 'sdrC|A0A6A8FED6', 'ompA|A0A3B6XXR4', 'yfiB|Q9I4L6', 'sipW|P54506', 'ChiA|P32823', 'HfsC|Q9A5L8', 'HfsA|Q9A5L6', 'SRFAD|Q08788']	4	hfs_foo_chia_sdrc	adhesion_chitinase-production	2	2527969	Rubinisphaera italica
GCA_002689445.1	11	['HfsF|Q9A5M1', 'HfsH|Q9A5L9', 'HfsG|Q9A5M0', 'ompA|A0A3B6XXR4', 'yfiB|Q9I4L6', 'sipW|P54506', 'RbmC|A0A2S1ZSI6', 'ChiA|P32823', 'HfsC|Q9A5L8', 'Bap1|Q9KQW0', 'SRFAD|Q08788']	3	chia_bap1_rbmc	chitinase-production_adhesion	2	1913989	Gammaproteobacteria bacterium
GCA_004310335.1	17	['SRFAA|P27206', 'SRFAB|Q04747', 'HfsD|Q9A5L5', 'Foo1|A1X158', 'HfsF|Q9A5M1', 'HfsE|Q9A5M2', 'HfsG|Q9A5M0', 'HfsH|Q9A5L9', 'tpbB|A0A0H2Z7X0', 'sdrC|A0A6A8FED6', 'yfiB|Q9I4L6', 'sipW|P54506', 'ChiA|P32823', 'HfsC|Q9A5L8', 'HfaB|P27343', 'HfsA|Q9A5L6', 'SRFAD|Q08788']	5	hfs_hfacces_foo_chia_sdrc	adhesion_chitinase-production	2	1080224	Hyunsoonleella pacifica
GCA_003026365.1	16	['HfsD|Q9A5L5', 'OmpU|P0C6Q6', 'HfsF|Q9A5M1', 'HfsE|Q9A5M2', 'HfsG|Q9A5M0', 'sdrC|A0A6A8FED6', 'ompA|A0A3B6XXR4', 'yfiB|Q9I4L6', 'GbpA|C3LW75', 'sipW|P54506', 'ChiA|P32823', 'HfsC|Q9A5L8', 'yfiR|Q9I4L4', 'HfaB|P27343', 'HfsA|Q9A5L6', 'SRFAD|Q08788']	5	hfacces_chia_ompu_sdrc_gbpa	adhesion_chitinase-production	2	661	Photobacterium angustum
GCA_014077415.1	18	['HfsD|Q9A5L5', 'Foo1|A1X158', 'HfsG|Q9A5M0', 'HfsH|Q9A5L9', 'OmpU|P0C6Q6', 'tpbB|A0A0H2Z7X0', 'sdrC|A0A6A8FED6', 'ompA|A0A3B6XXR4', 'yfiB|Q9I4L6', 'ompW|A0A0F4PBB9', 'pilF|A0A290TXQ9', 'sipW|P54506', 'ChiA|P32823', 'HfsC|Q9A5L8', 'yfiR|Q9I4L4', 'HfaB|P27343', 'HfsA|Q9A5L6', 'SRFAD|Q08788']	7	hfacces_foo_chia_omp_yfi_ompu_sdrc	adhesion_chitinase-production	2	2759840	Colwellia sp. BRX10-7
GCA_002874055.1	17	['HfsD|Q9A5L5', 'OmpU|P0C6Q6', 'HfsF|Q9A5M1', 'HfsH|Q9A5L9', 'HfsG|Q9A5M0', 'tpbB|A0A0H2Z7X0', 'ompA|A0A3B6XXR4', 'yfiB|Q9I4L6', 'ompW|A0A0F4PBB9', 'GbpA|C3LW75', 'sipW|P54506', 'ChiA|P32823', 'HfsC|Q9A5L8', 'yfiR|Q9I4L4', 'HfaB|P27343', 'HfsA|Q9A5L6', 'SRFAD|Q08788']	5	hfacces_chia_yfi_ompu_gbpa	adhesion_chitinase-production	2	1884478	Vibrio sp. 10N.286.55.C11
GCA_002591625.1	11	['HfsD|Q9A5L5', 'OmpU|P0C6Q6', 'HfsF|Q9A5M1', 'HfsH|Q9A5L9', 'HfsG|Q9A5M0', 'sdrC|A0A6A8FED6', 'yfiB|Q9I4L6', 'sipW|P54506', 'ChiA|P32823', 'HfsA|Q9A5L6', 'SRFAD|Q08788']	3	chia_ompu_sdrc	chitinase-production_adhesion	2	2026782	Porticoccaceae bacterium
GCA_002706925.1	13	['HfsD|Q9A5L5', 'HfsF|Q9A5M1', 'HfsE|Q9A5M2', 'HfsH|Q9A5L9', 'HfsG|Q9A5M0', 'sdrC|A0A6A8FED6', 'yfiB|Q9I4L6', 'ompW|A0A0F4PBB9', 'sipW|P54506', 'ChiA|P32823', 'HfsC|Q9A5L8', 'HfsA|Q9A5L6', 'SRFAD|Q08788']	3	hfs_chia_sdrc	adhesion_chitinase-production	2	1909294	Hyphomicrobiales bacterium
GCA_002683675.1	21	['SRFAB|Q04747', 'Foo1|A1X158', 'ompA|A0A3B6XXR4', 'HfaB|P27343', 'SRFAA|P27206', 'OmpU|P0C6Q6', 'tpbB|A0A0H2Z7X0', 'ompW|A0A0F4PBB9', 'HfsD|Q9A5L5', 'HfsF|Q9A5M1', 'HfsE|Q9A5M2', 'HfsG|Q9A5M0', 'HfsH|Q9A5L9', 'yfiB|Q9I4L6', 'sipW|P54506', 'ChiA|P32823', 'HfsC|Q9A5L8', 'yfiR|Q9I4L4', 'HfsA|Q9A5L6', 'sdrC|A0A6A8FED6', 'SRFAD|Q08788']	7	hfs_hfacces_foo_chia_yfi_ompu_sdrc	adhesion_chitinase-production	2	1869214	Rheinheimera sp.
GCA_002712945.1	13	['HfsD|Q9A5L5', 'OmpU|P0C6Q6', 'HfsF|Q9A5M1', 'HfsE|Q9A5M2', 'HfsH|Q9A5L9', 'HfsG|Q9A5M0', 'yfiB|Q9I4L6', 'ompW|A0A0F4PBB9', 'sipW|P54506', 'ChiA|P32823', 'HfsC|Q9A5L8', 'HfsA|Q9A5L6', 'SRFAD|Q08788']	3	hfs_chia_ompu	adhesion_chitinase-production	2	2024827	Citromicrobium sp.
GCA_000327045.1	13	['HfsD|Q9A5L5', 'OmpU|P0C6Q6', 'HfsF|Q9A5M1', 'HfsE|Q9A5M2', 'HfsH|Q9A5L9', 'HfsG|Q9A5M0', 'tpbB|A0A0H2Z7X0', 'yfiB|Q9I4L6', 'sipW|P54506', 'ChiA|P32823', 'HfsC|Q9A5L8', 'HfsA|Q9A5L6', 'SRFAD|Q08788']	3	hfs_chia_ompu	adhesion_chitinase-production	2	765912	Thioflavicoccus mobilis
[truncated: 3,405 more rows]
