# Supplementary material for: Rational assembly of synthetic marine biofilm community with chitinase production
Source: Research Square preprint supplement (doi:10.21203/rs.3.rs-9419003/v1), 2026-06-04
Supplement: Supplementary file 6 [file b90132cdb077c496bef9d06e.xlsx]

## Sheet: protein_systems_to_find
Supplementray Table 4: Search result for homologous protein in the genomes.
Alias	UniprotID	species	description	trait	Interpro_crossreference
bslA	P71014	Bacillus subtilis	Biofilm-surface layer protein A	drag-reducing
bslB	P39632	Bacillus subtilis	Probable biofilm-surface layer protein B	drag-reducing
Hydrophobin_2	P79073	Hypocrea jecorina	Hydrophobin-2	drag-reducing
Hydrophobin	Q04571	Neurospora crassa	Hydrophobin	drag-reducing
Trihydrophobin	Q9UVI4	Claviceps fusiformis	Trihydrophobin	drag-reducing
HydrophobinA	D4ARW0	Arthroderma benhamiae	Hydrophobin-A	drag-reducing
Hydrophobin_3	O13300	Agaricus bisporus	Hydrophobin-3	drag-reducing
Hydrophobin_neosartorya	P41746	Neosartorya fumigata	Hydrophobin	drag-reducing
Hydrophobin_1_agaricus	P49072	Agaricus bisporus	Hydrophobin-1	drag-reducing
Hydrophobin_1	P52754	Hypocrea jecorina	Hydrophobin-1	drag-reducing
Hydrophobin_B	O43122	Agaricus bisporus	Hydrophobin-B	drag-reducing
Hydrophobin_2	P49073	Agaricus bisporus	Hydrophobin-2	drag-reducing
Hydrophobin_2	P52749	Pisolithus tinctorius	Hydrophobin-2 (Fragment)	drag-reducing
ssgA	P52752	Metarhizium anisopliae	Hydrophobin-like protein ssgA	drag-reducing
Hydrophobin_1_davidiella	Q8NIN9	Davidiella tassiana	Hydrophobin-1	drag-reducing
CHPH	Q9AD92	Streptomyces coelicolor	Chaplin-H	drag-reducing
CHPF	Q9KYG7	Streptomyces coelicolor	Chaplin-F	drag-reducing
CHPD	Q9L1J9	Streptomyces coelicolor	Chaplin-D	drag-reducing
CHPE	Q9X9Z2	Streptomyces coelicolor	Chaplin-C	drag-reducing
CHPC	Q9AD93	Streptomyces coelicolor	Chaplin-C	drag-reducing
CHPG	Q9KYH3	Streptomyces coelicolor	Chaplin-G	drag-reducing
CHPA	Q8CJY7	Streptomyces coelicolor	Chaplin-A	drag-reducing
CHPB	Q9X7U2	Streptomyces coelicolor	Chaplin-B	drag-reducing
SRFAA	P27206	Bacillus subtilis	Surfactin synthase subunit 1	drag-reducing
SRFAB	Q04747	Bacillus subtilis	Surfactin synthase subunit 2	drag-reducing
SRFAC	Q08787	Bacillus subtilis	Surfactin synthase subunit 3	drag-reducing
SRFAD	Q08788	Bacillus subtilis	Surfactin synthase thioesterase subunit	drag-reducing
HfsE	Q9A5M2	Caulobacter vibrioides (Caulobacter crescendus)	HfsE	adhesion
HfsF	Q9A5M1	Caulobacter vibrioides (Caulobacter crescendus)	HfsF	adhesion
HfsG	Q9A5M0	Caulobacter vibrioides (Caulobacter crescendus)	HfsG	adhesion
HfsH	Q9A5L9	Caulobacter vibrioides (Caulobacter crescendus)	HfsH	adhesion
HfsC	Q9A5L8	Caulobacter vibrioides (Caulobacter crescendus)	HfsC	adhesion
HfsB	Q9A5L7	Caulobacter vibrioides (Caulobacter crescendus)	HfsB	adhesion
HfsA	Q9A5L6	Caulobacter vibrioides (Caulobacter crescendus)	HfsA	adhesion
HfsD	Q9A5L5	Caulobacter vibrioides (Caulobacter crescendus)	HfsD	adhesion
HapA	P27342	Caulobacter vibrioides (Caulobacter crescendus)	Holdfast attachment protein A	adhesion
HfaB	P27343	Caulobacter vibrioides (Caulobacter crescendus)	Putative transcription activator protein HfaB	adhesion
HapD	Q45977	Caulobacter vibrioides (Caulobacter crescendus)	Holdfast attachment protein D	adhesion
Foo1	A1X158	Perna viridis (Asian green mussle)	Foot protein 1	adhesion
ChiA	P32823	Pseudoalteromonas piscicida	Chitinase A	chitinase production
Lec	A0A5S3X0S8	Pseudoalteromonas rubra	Lectin	colonization resistance
GalL	C0HLX7	Chondrilla caribensis	Galactose-binding lectin	colonization resistance
Bap1	Q9KQW0	Vibrio cholerae	Matrix-associated protein	adhesion
RbmA	A0A2H4NFB8	Vibrio cholerae	Matrix-associated protein	adhesion
RbmC	A0A2S1ZSI6	Vibrio cholerae	Matrix-associated protein	adhesion
GbpA	C3LW75	Vibrio cholerae	Extracellular chitin binding protein	adhesion
OmpU	P0C6Q6	Vibrio cholerae	OmpU	adhesion
tpbB	A0A0H2Z7X0	Pseudomonas aeruginosa	tpbB	adhesion
yfiB	Q9I4L6	Pseudomonas aeruginosa	yfiB	adhesion
yfiR	Q9I4L4	Pseudomonas aeruginosa	yfiR	adhesion
tasA	P54507	Bacillus subtilis	Major biofilm matrix component (synergy with bslA)	adhesion
sdrC	A0A6A8FED6	Staphylococcus aureus	sdrC	adhesion
ompW	A0A0F4PBB9	Pseudoalteromonas spp	production of biofilm	adhesion
ompA	A0A3B6XXR4	Pseudoalteromonas spp	production of biofilm	adhesion
pilF	A0A290TXQ9	Pseudoalteromonas spp	production of biofilm	adhesion
sipW	P54506	Bacillus subtilis	Major biofilm matrix component (synergy with bslA)	adhesion
TapA	P40949	Bacillus subtilis	Major biofilm matrix component (synergy with bslA)	adhesion
